# Supplementary material
Source: publisher site journal article supplement (https://www.dovepress.com/get_supplementary_file.php?f=484366.xlsx)
Supplement: Supplementary file 1 [file get_supplementary_file.php]

## Sheet: ST1
Supplement Tabel 1: Detailed information on skin microbiota
id	trait	population	Category	Samplesize	Cohort
GCST90133164-1	Univariate microbial feature (genus: chryseobacterium) at the antecubital fossa (moist skin)	European	Genus	142	KORA FF4
GCST90133164-2	Univariate microbial feature (genus: chryseobacterium) at the antecubital fossa (moist skin)	European	Genus	138	PopGen
GCST90133165-1	Univariate microbial feature (genus: acinetobacter) at the antecubital fossa (moist skin)	European	Genus	265	KORA FF4
GCST90133165-2	Univariate microbial feature (genus: acinetobacter) at the antecubital fossa (moist skin)	European	Genus	203	PopGen
GCST90133166-1	Univariate microbial feature (genus: paracoccus) at the antecubital fossa (moist skin)	European	Genus	180	KORA FF4
GCST90133166-2	Univariate microbial feature (genus: paracoccus) at the antecubital fossa (moist skin)	European	Genus	184	PopGen
GCST90133167-1	Univariate microbial feature (genus: rothia) at the antecubital fossa (moist skin)	European	Genus	134	KORA FF4
GCST90133167-2	Univariate microbial feature (genus: rothia) at the antecubital fossa (moist skin)	European	Genus	184	PopGen
GCST90133168-1	Univariate microbial feature (asv: asv005) at the antecubital fossa (moist skin)	European	ASV	236	KORA FF4
GCST90133168-2	Univariate microbial feature (asv: asv005) at the antecubital fossa (moist skin)	European	ASV	197	PopGen
GCST90133169-1	Univariate microbial feature (asv: asv013) at the antecubital fossa (moist skin)	European	ASV	186	KORA FF4
GCST90133169-2	Univariate microbial feature (asv: asv013) at the antecubital fossa (moist skin)	European	ASV	175	PopGen
GCST90133170-1	Univariate microbial feature (asv: asv019) at the antecubital fossa (moist skin)	European	ASV	120	KORA FF4
GCST90133170-2	Univariate microbial feature (asv: asv019) at the antecubital fossa (moist skin)	European	ASV	125	PopGen
GCST90133171-1	Univariate microbial feature (asv: asv037) at the antecubital fossa (moist skin)	European	ASV	104	KORA FF4
GCST90133171-2	Univariate microbial feature (asv: asv037) at the antecubital fossa (moist skin)	European	ASV	103	PopGen
GCST90133172-1	Univariate microbial feature (asv: asv002) at the antecubital fossa (moist skin)	European	ASV	301	KORA FF4
GCST90133172-2	Univariate microbial feature (asv: asv002) at the antecubital fossa (moist skin)	European	ASV	249	PopGen
GCST90133173-1	Univariate microbial feature (asv: asv003) at the antecubital fossa (moist skin)	European	ASV	259	KORA FF4
GCST90133173-2	Univariate microbial feature (asv: asv003) at the antecubital fossa (moist skin)	European	ASV	240	PopGen
GCST90133174-1	Univariate microbial feature (class: alphaproteobacteria) at the dorsal forearm (dry skin)	European	Class	228	PopGen
GCST90133174-2	Univariate microbial feature (class: alphaproteobacteria) at the dorsal forearm (dry skin)	European	Class	220	PopGen
GCST90133175-1	Univariate microbial feature (asv: asv004) at the antecubital fossa (moist skin)	European	ASV	301	KORA FF4
GCST90133175-2	Univariate microbial feature (asv: asv004) at the antecubital fossa (moist skin)	European	ASV	255	PopGen
GCST90133176-1	Univariate microbial feature (asv: asv006) at the antecubital fossa (moist skin)	European	ASV	208	KORA FF4
GCST90133176-2	Univariate microbial feature (asv: asv006) at the antecubital fossa (moist skin)	European	ASV	193	PopGen
GCST90133177-1	Univariate microbial feature (asv: asv008) at the antecubital fossa (moist skin)	European	ASV	183	KORA FF4
GCST90133177-2	Univariate microbial feature (asv: asv008) at the antecubital fossa (moist skin)	European	ASV	133	PopGen
GCST90133178-1	Univariate microbial feature (asv: asv010) at the antecubital fossa (moist skin)	European	ASV	201	KORA FF4
GCST90133178-2	Univariate microbial feature (asv: asv010) at the antecubital fossa (moist skin)	European	ASV	192	PopGen
GCST90133179-1	Univariate microbial feature (asv: asv011) at the antecubital fossa (moist skin)	European	ASV	192	KORA FF4
GCST90133179-2	Univariate microbial feature (asv: asv011) at the antecubital fossa (moist skin)	European	ASV	176	PopGen
GCST90133180-1	Univariate microbial feature (asv: asv012) at the antecubital fossa (moist skin)	European	ASV	170	KORA FF4
GCST90133180-2	Univariate microbial feature (asv: asv012) at the antecubital fossa (moist skin)	European	ASV	131	PopGen
GCST90133181-1	Univariate microbial feature (asv: asv015) at the antecubital fossa (moist skin)	European	ASV	243	KORA FF4
GCST90133181-2	Univariate microbial feature (asv: asv015) at the antecubital fossa (moist skin)	European	ASV	191	PopGen
GCST90133182-1	Univariate microbial feature (asv: asv016) at the antecubital fossa (moist skin)	European	ASV	180	KORA FF4
GCST90133182-2	Univariate microbial feature (asv: asv016) at the antecubital fossa (moist skin)	European	ASV	189	PopGen
GCST90133183-1	Univariate microbial feature (asv: asv021) at the antecubital fossa (moist skin)	European	ASV	171	KORA FF4
GCST90133183-2	Univariate microbial feature (asv: asv021) at the antecubital fossa (moist skin)	European	ASV	164	PopGen
GCST90133184-1	Univariate microbial feature (asv: asv022) at the antecubital fossa (moist skin)	European	ASV	138	KORA FF4
GCST90133184-2	Univariate microbial feature (asv: asv022) at the antecubital fossa (moist skin)	European	ASV	138	PopGen
GCST90133185-1	Univariate microbial feature (order: bacteroidales) at the dorsal forearm (dry skin)	European	Order	168	PopGen
GCST90133185-2	Univariate microbial feature (order: bacteroidales) at the dorsal forearm (dry skin)	European	Order	207	PopGen
GCST90133186-1	Univariate microbial feature (asv: asv026) at the antecubital fossa (moist skin)	European	ASV	233	KORA FF4
GCST90133186-2	Univariate microbial feature (asv: asv026) at the antecubital fossa (moist skin)	European	ASV	111	PopGen
GCST90133187-1	Univariate microbial feature (asv: asv039) at the antecubital fossa (moist skin)	European	ASV	139	KORA FF4
GCST90133187-2	Univariate microbial feature (asv: asv039) at the antecubital fossa (moist skin)	European	ASV	113	PopGen
GCST90133188-1	Univariate microbial feature (asv: asv042) at the antecubital fossa (moist skin)	European	ASV	127	KORA FF4
GCST90133188-2	Univariate microbial feature (asv: asv042) at the antecubital fossa (moist skin)	European	ASV	101	PopGen
GCST90133189-1	Univariate microbial feature (asv: asv045) at the antecubital fossa (moist skin)	European	ASV	148	KORA FF4
GCST90133189-2	Univariate microbial feature (asv: asv045) at the antecubital fossa (moist skin)	European	ASV	117	PopGen
GCST90133190-1	Univariate microbial feature (asv: asv054) at the antecubital fossa (moist skin)	European	ASV	139	KORA FF4
GCST90133190-2	Univariate microbial feature (asv: asv054) at the antecubital fossa (moist skin)	European	ASV	145	PopGen
GCST90133191-2	Univariate microbial feature (asv: asv057) at the antecubital fossa (moist skin)	European	ASV	103	PopGen
GCST90133192-1	Univariate microbial feature (order: actinomycetales) at the forehead (sebaceous skin)	European	Order	252	PopGen
GCST90133192-2	Univariate microbial feature (order: actinomycetales) at the forehead (sebaceous skin)	European	Order	317	KORA FF4
GCST90133193-1	Univariate microbial feature (phylum: firmicutes) at the forehead (sebaceous skin)	European	Phylum	252	PopGen
GCST90133193-2	Univariate microbial feature (phylum: firmicutes) at the forehead (sebaceous skin)	European	Phylum	317	KORA FF4
GCST90133194-1	Univariate microbial feature (phylum: proteobacteria) at the forehead (sebaceous skin)	European	Phylum	251	PopGen
GCST90133194-2	Univariate microbial feature (phylum: proteobacteria) at the forehead (sebaceous skin)	European	Phylum	288	KORA FF4
GCST90133195-1	Univariate microbial feature (class: bacilli) at the forehead (sebaceous skin)	European	Class	252	PopGen
GCST90133195-2	Univariate microbial feature (class: bacilli) at the forehead (sebaceous skin)	European	Class	317	KORA FF4
GCST90133196-1	Univariate microbial feature (order: bacillales) at the dorsal forearm (dry skin)	European	Order	259	PopGen
GCST90133196-2	Univariate microbial feature (order: bacillales) at the dorsal forearm (dry skin)	European	Order	249	PopGen
GCST90133197-1	Univariate microbial feature (class: betaproteobacteria) at the forehead (sebaceous skin)	European	Class	225	PopGen
GCST90133197-2	Univariate microbial feature (class: betaproteobacteria) at the forehead (sebaceous skin)	European	Class	291	KORA FF4
GCST90133198-1	Univariate microbial feature (class: gammaproteobacteria) at the forehead (sebaceous skin)	European	Class	232	PopGen
GCST90133198-2	Univariate microbial feature (class: gammaproteobacteria) at the forehead (sebaceous skin)	European	Class	192	KORA FF4
GCST90133199-1	Univariate microbial feature (genus: staphylococcus) at the forehead (sebaceous skin)	European	Genus	252	PopGen
GCST90133199-2	Univariate microbial feature (genus: staphylococcus) at the forehead (sebaceous skin)	European	Genus	317	KORA FF4
GCST90133200-1	Univariate microbial feature (family: neisseriaceae) at the forehead (sebaceous skin)	European	Family	203	PopGen
GCST90133200-2	Univariate microbial feature (family: neisseriaceae) at the forehead (sebaceous skin)	European	Family	190	KORA FF4
GCST90133201-1	Univariate microbial feature (genus: propionibacterium) at the forehead (sebaceous skin)	European	Genus	252	PopGen
GCST90133201-2	Univariate microbial feature (genus: propionibacterium) at the forehead (sebaceous skin)	European	Genus	317	KORA FF4
GCST90133202-1	Univariate microbial feature (genus: corynebacterium) at the forehead (sebaceous skin)	European	Genus	252	PopGen
GCST90133202-2	Univariate microbial feature (genus: corynebacterium) at the forehead (sebaceous skin)	European	Genus	309	KORA FF4
GCST90133203-1	Univariate microbial feature (asv: asv001) at the forehead (sebaceous skin)	European	ASV	252	PopGen
GCST90133203-2	Univariate microbial feature (asv: asv001) at the forehead (sebaceous skin)	European	ASV	317	KORA FF4
GCST90133204-1	Univariate microbial feature (asv: asv005) at the forehead (sebaceous skin)	European	ASV	219	PopGen
GCST90133204-2	Univariate microbial feature (asv: asv005) at the forehead (sebaceous skin)	European	ASV	298	KORA FF4
GCST90133205-1	Univariate microbial feature (asv: asv033) at the forehead (sebaceous skin)	European	ASV	133	PopGen
GCST90133205-2	Univariate microbial feature (asv: asv033) at the forehead (sebaceous skin)	European	ASV	117	KORA FF4
GCST90133206-1	Univariate microbial feature (asv: asv002) at the forehead (sebaceous skin)	European	ASV	251	PopGen
GCST90133206-2	Univariate microbial feature (asv: asv002) at the forehead (sebaceous skin)	European	ASV	317	KORA FF4
GCST90133207-1	Univariate microbial feature (order: burkholderiales) at the dorsal forearm (dry skin)	European	Order	200	PopGen
GCST90133207-2	Univariate microbial feature (order: burkholderiales) at the dorsal forearm (dry skin)	European	Order	193	PopGen
GCST90133208-1	Univariate microbial feature (asv: asv004) at the forehead (sebaceous skin)	European	ASV	243	PopGen
GCST90133208-2	Univariate microbial feature (asv: asv004) at the forehead (sebaceous skin)	European	ASV	268	KORA FF4
GCST90133209-1	Univariate microbial feature (asv: asv007) at the forehead (sebaceous skin)	European	ASV	147	PopGen
GCST90133209-2	Univariate microbial feature (asv: asv007) at the forehead (sebaceous skin)	European	ASV	175	KORA FF4
GCST90133210-1	Univariate microbial feature (asv: asv008) at the forehead (sebaceous skin)	European	ASV	167	PopGen
GCST90133210-2	Univariate microbial feature (asv: asv008) at the forehead (sebaceous skin)	European	ASV	285	KORA FF4
GCST90133211-1	Univariate microbial feature (asv: asv010) at the forehead (sebaceous skin)	European	ASV	218	PopGen
GCST90133211-2	Univariate microbial feature (asv: asv010) at the forehead (sebaceous skin)	European	ASV	242	KORA FF4
GCST90133212-1	Univariate microbial feature (asv: asv013) at the forehead (sebaceous skin)	European	ASV	166	PopGen
GCST90133212-2	Univariate microbial feature (asv: asv013) at the forehead (sebaceous skin)	European	ASV	264	KORA FF4
GCST90133213-1	Univariate microbial feature (asv: asv015) at the forehead (sebaceous skin)	European	ASV	195	PopGen
GCST90133213-2	Univariate microbial feature (asv: asv015) at the forehead (sebaceous skin)	European	ASV	262	KORA FF4
GCST90133214-1	Univariate microbial feature (asv: asv093) at the forehead (sebaceous skin)	European	ASV	137	PopGen
GCST90133214-2	Univariate microbial feature (asv: asv093) at the forehead (sebaceous skin)	European	ASV	143	KORA FF4
GCST90133215-1	Univariate microbial feature (asv: asv122) at the forehead (sebaceous skin)	European	ASV	143	PopGen
GCST90133215-2	Univariate microbial feature (asv: asv122) at the forehead (sebaceous skin)	European	ASV	136	KORA FF4
GCST90133216-1	Univariate microbial feature (family: moraxellaceae) at the dorsal forearm (dry skin)	European	Family	255	PopGen
GCST90133216-2	Univariate microbial feature (family: moraxellaceae) at the dorsal forearm (dry skin)	European	Family	250	PopGen
GCST90133217-1	Univariate microbial feature (family: neisseriaceae) at the dorsal forearm (dry skin)	European	Family	221	PopGen
GCST90133217-2	Univariate microbial feature (family: neisseriaceae) at the dorsal forearm (dry skin)	European	Family	185	PopGen
GCST90133218-1	Univariate microbial feature (order: lactobacillales) at the dorsal forearm (dry skin)	European	Order	237	PopGen
GCST90133218-2	Univariate microbial feature (order: lactobacillales) at the dorsal forearm (dry skin)	European	Order	236	PopGen
GCST90133219-1	Univariate microbial feature (genus: haemophilus) at the dorsal forearm (dry skin)	European	Genus	148	PopGen
GCST90133219-2	Univariate microbial feature (genus: haemophilus) at the dorsal forearm (dry skin)	European	Genus	142	PopGen
GCST90133220-1	Univariate microbial feature (family: rhodobacteraceae) at the dorsal forearm (dry skin)	European	Family	205	PopGen
GCST90133220-2	Univariate microbial feature (family: rhodobacteraceae) at the dorsal forearm (dry skin)	European	Family	207	PopGen
GCST90133221-1	Univariate microbial feature (asv: asv001) at the dorsal forearm (dry skin)	European	ASV	260	PopGen
GCST90133221-2	Univariate microbial feature (asv: asv001) at the dorsal forearm (dry skin)	European	ASV	251	PopGen
GCST90133222-1	Univariate microbial feature (order: actinomycetales) at the dorsal forearm (dry skin)	European	Order	260	PopGen
GCST90133222-2	Univariate microbial feature (order: actinomycetales) at the dorsal forearm (dry skin)	European	Order	251	PopGen
GCST90133223-1	Univariate microbial feature (genus: staphylococcus) at the dorsal forearm (dry skin)	European	Genus	259	PopGen
GCST90133223-2	Univariate microbial feature (genus: staphylococcus) at the dorsal forearm (dry skin)	European	Genus	249	PopGen
GCST90133224-1	Univariate microbial feature (genus: corynebacterium) at the dorsal forearm (dry skin)	European	Genus	259	PopGen
GCST90133224-2	Univariate microbial feature (genus: corynebacterium) at the dorsal forearm (dry skin)	European	Genus	250	PopGen
GCST90133225-1	Univariate microbial feature (family: clostridiales) at the incertae (dry skin)	European	Family	236	PopGen
GCST90133225-2	Univariate microbial feature (family: clostridiales) at the incertae (dry skin)	European	Family	233	PopGen
GCST90133226-1	Univariate microbial feature (asv: asv009) at the dorsal forearm (dry skin)	European	ASV	184	PopGen
GCST90133226-2	Univariate microbial feature (asv: asv009) at the dorsal forearm (dry skin)	European	ASV	176	PopGen
GCST90133227-1	Univariate microbial feature (family: micrococcaceae) at the dorsal forearm (dry skin)	European	Family	250	PopGen
GCST90133227-2	Univariate microbial feature (family: micrococcaceae) at the dorsal forearm (dry skin)	European	Family	239	PopGen
GCST90133228-1	Univariate microbial feature (family: streptococcaceae) at the dorsal forearm (dry skin)	European	Family	234	PopGen
GCST90133228-2	Univariate microbial feature (family: streptococcaceae) at the dorsal forearm (dry skin)	European	Family	236	PopGen
GCST90133229-1	Univariate microbial feature (genus: bacteroides) at the dorsal forearm (dry skin)	European	Genus	168	PopGen
GCST90133229-2	Univariate microbial feature (genus: bacteroides) at the dorsal forearm (dry skin)	European	Genus	181	PopGen
GCST90133230-1	Univariate microbial feature (genus: anaerococcus) at the dorsal forearm (dry skin)	European	Genus	173	PopGen
GCST90133230-2	Univariate microbial feature (genus: anaerococcus) at the dorsal forearm (dry skin)	European	Genus	179	PopGen
GCST90133231-1	Univariate microbial feature (genus: enhydrobacter) at the dorsal forearm (dry skin)	European	Genus	245	PopGen
GCST90133231-2	Univariate microbial feature (genus: enhydrobacter) at the dorsal forearm (dry skin)	European	Genus	233	PopGen
GCST90133232-1	Univariate microbial feature (genus: micrococcus) at the dorsal forearm (dry skin)	European	Genus	206	PopGen
GCST90133232-2	Univariate microbial feature (genus: micrococcus) at the dorsal forearm (dry skin)	European	Genus	196	PopGen
GCST90133233-1	Univariate microbial feature (phylum: firmicutes) at the dorsal forearm (dry skin)	European	Phylum	260	PopGen
GCST90133233-2	Univariate microbial feature (phylum: firmicutes) at the dorsal forearm (dry skin)	European	Phylum	251	PopGen
GCST90133234-1	Univariate microbial feature (genus: streptococcus) at the dorsal forearm (dry skin)	European	Genus	233	PopGen
GCST90133234-2	Univariate microbial feature (genus: streptococcus) at the dorsal forearm (dry skin)	European	Genus	234	PopGen
GCST90133235-1	Univariate microbial feature (asv: asv031) at the dorsal forearm (dry skin)	European	ASV	114	PopGen
GCST90133235-2	Univariate microbial feature (asv: asv031) at the dorsal forearm (dry skin)	European	ASV	118	PopGen
GCST90133236-1	Univariate microbial feature (genus: chryseobacterium) at the dorsal forearm (dry skin)	European	Genus	165	PopGen
GCST90133236-2	Univariate microbial feature (genus: chryseobacterium) at the dorsal forearm (dry skin)	European	Genus	162	PopGen
GCST90133237-1	Univariate microbial feature (genus: acinetobacter) at the dorsal forearm (dry skin)	European	Genus	227	PopGen
GCST90133237-2	Univariate microbial feature (genus: acinetobacter) at the dorsal forearm (dry skin)	European	Genus	226	PopGen
GCST90133238-1	Univariate microbial feature (genus: paracoccus) at the dorsal forearm (dry skin)	European	Genus	186	PopGen
GCST90133238-2	Univariate microbial feature (genus: paracoccus) at the dorsal forearm (dry skin)	European	Genus	186	PopGen
GCST90133239-1	Univariate microbial feature (genus: finegoldia) at the dorsal forearm (dry skin)	European	Genus	215	PopGen
GCST90133239-2	Univariate microbial feature (genus: finegoldia) at the dorsal forearm (dry skin)	European	Genus	214	PopGen
GCST90133240-1	Univariate microbial feature (genus: rothia) at the dorsal forearm (dry skin)	European	Genus	200	PopGen
GCST90133240-2	Univariate microbial feature (genus: rothia) at the dorsal forearm (dry skin)	European	Genus	191	PopGen
GCST90133241-1	Univariate microbial feature (genus: kocuria) at the dorsal forearm (dry skin)	European	Genus	196	PopGen
GCST90133241-2	Univariate microbial feature (genus: kocuria) at the dorsal forearm (dry skin)	European	Genus	178	PopGen
GCST90133242-1	Univariate microbial feature (asv: asv005) at the dorsal forearm (dry skin)	European	ASV	220	PopGen
GCST90133242-2	Univariate microbial feature (asv: asv005) at the dorsal forearm (dry skin)	European	ASV	220	PopGen
GCST90133243-1	Univariate microbial feature (asv: asv007) at the dorsal forearm (dry skin)	European	ASV	110	PopGen
GCST90133243-2	Univariate microbial feature (asv: asv007) at the dorsal forearm (dry skin)	European	ASV	112	PopGen
GCST90133244-1	Univariate microbial feature (phylum: proteobacteria) at the dorsal forearm (dry skin)	European	Phylum	260	PopGen
GCST90133244-2	Univariate microbial feature (phylum: proteobacteria) at the dorsal forearm (dry skin)	European	Phylum	251	PopGen
GCST90133245-1	Univariate microbial feature (asv: asv013) at the dorsal forearm (dry skin)	European	ASV	170	PopGen
GCST90133245-2	Univariate microbial feature (asv: asv013) at the dorsal forearm (dry skin)	European	ASV	178	PopGen
GCST90133246-1	Univariate microbial feature (asv: asv019) at the dorsal forearm (dry skin)	European	ASV	138	PopGen
GCST90133246-2	Univariate microbial feature (asv: asv019) at the dorsal forearm (dry skin)	European	ASV	133	PopGen
GCST90133247-1	Univariate microbial feature (asv: asv037) at the dorsal forearm (dry skin)	European	ASV	121	PopGen
GCST90133247-2	Univariate microbial feature (asv: asv037) at the dorsal forearm (dry skin)	European	ASV	125	PopGen
GCST90133248-1	Univariate microbial feature (asv: asv072) at the dorsal forearm (dry skin)	European	ASV	149	PopGen
GCST90133248-2	Univariate microbial feature (asv: asv072) at the dorsal forearm (dry skin)	European	ASV	139	PopGen
GCST90133249-1	Univariate microbial feature (asv: asv002) at the dorsal forearm (dry skin)	European	ASV	259	PopGen
GCST90133249-2	Univariate microbial feature (asv: asv002) at the dorsal forearm (dry skin)	European	ASV	248	PopGen
GCST90133250-1	Univariate microbial feature (asv: asv003) at the dorsal forearm (dry skin)	European	ASV	220	PopGen
GCST90133250-2	Univariate microbial feature (asv: asv003) at the dorsal forearm (dry skin)	European	ASV	218	PopGen
GCST90133251-1	Univariate microbial feature (asv: asv004) at the dorsal forearm (dry skin)	European	ASV	259	PopGen
GCST90133251-2	Univariate microbial feature (asv: asv004) at the dorsal forearm (dry skin)	European	ASV	249	PopGen
GCST90133252-1	Univariate microbial feature (asv: asv006) at the dorsal forearm (dry skin)	European	ASV	138	PopGen
GCST90133252-2	Univariate microbial feature (asv: asv006) at the dorsal forearm (dry skin)	European	ASV	138	PopGen
GCST90133253-1	Univariate microbial feature (asv: asv008) at the dorsal forearm (dry skin)	European	ASV	142	PopGen
GCST90133253-2	Univariate microbial feature (asv: asv008) at the dorsal forearm (dry skin)	European	ASV	142	PopGen
GCST90133254-1	Univariate microbial feature (asv: asv010) at the dorsal forearm (dry skin)	European	ASV	225	PopGen
GCST90133254-2	Univariate microbial feature (asv: asv010) at the dorsal forearm (dry skin)	European	ASV	214	PopGen
GCST90133255-1	Univariate microbial feature (phylum: bacteroidetes) at the dorsal forearm (dry skin)	European	Phylum	236	PopGen
GCST90133255-2	Univariate microbial feature (phylum: bacteroidetes) at the dorsal forearm (dry skin)	European	Phylum	232	PopGen
GCST90133256-1	Univariate microbial feature (asv: asv011) at the dorsal forearm (dry skin)	European	ASV	117	PopGen
GCST90133256-2	Univariate microbial feature (asv: asv011) at the dorsal forearm (dry skin)	European	ASV	113	PopGen
GCST90133257-1	Univariate microbial feature (asv: asv015) at the dorsal forearm (dry skin)	European	ASV	200	PopGen
GCST90133257-2	Univariate microbial feature (asv: asv015) at the dorsal forearm (dry skin)	European	ASV	198	PopGen
GCST90133258-1	Univariate microbial feature (asv: asv016) at the dorsal forearm (dry skin)	European	ASV	207	PopGen
GCST90133258-2	Univariate microbial feature (asv: asv016) at the dorsal forearm (dry skin)	European	ASV	195	PopGen
GCST90133259-1	Univariate microbial feature (asv: asv021) at the dorsal forearm (dry skin)	European	ASV	166	PopGen
GCST90133259-2	Univariate microbial feature (asv: asv021) at the dorsal forearm (dry skin)	European	ASV	175	PopGen
GCST90133260-1	Univariate microbial feature (asv: asv022) at the dorsal forearm (dry skin)	European	ASV	148	PopGen
GCST90133260-2	Univariate microbial feature (asv: asv022) at the dorsal forearm (dry skin)	European	ASV	155	PopGen
GCST90133261-1	Univariate microbial feature (asv: asv023) at the dorsal forearm (dry skin)	European	ASV	126	PopGen
GCST90133261-2	Univariate microbial feature (asv: asv023) at the dorsal forearm (dry skin)	European	ASV	122	PopGen
GCST90133262-1	Univariate microbial feature (asv: asv035) at the dorsal forearm (dry skin)	European	ASV	198	PopGen
GCST90133262-2	Univariate microbial feature (asv: asv035) at the dorsal forearm (dry skin)	European	ASV	188	PopGen
GCST90133263-1	Univariate microbial feature (asv: asv039) at the dorsal forearm (dry skin)	European	ASV	129	PopGen
GCST90133263-2	Univariate microbial feature (asv: asv039) at the dorsal forearm (dry skin)	European	ASV	127	PopGen
GCST90133264-1	Univariate microbial feature (asv: asv042) at the dorsal forearm (dry skin)	European	ASV	131	PopGen
GCST90133264-2	Univariate microbial feature (asv: asv042) at the dorsal forearm (dry skin)	European	ASV	132	PopGen
GCST90133265-1	Univariate microbial feature (asv: asv045) at the dorsal forearm (dry skin)	European	ASV	152	PopGen
GCST90133265-2	Univariate microbial feature (asv: asv045) at the dorsal forearm (dry skin)	European	ASV	157	PopGen
GCST90133266-1	Univariate microbial feature (class: bacilli) at the dorsal forearm (dry skin)	European	Class	260	PopGen
GCST90133266-2	Univariate microbial feature (class: bacilli) at the dorsal forearm (dry skin)	European	Class	251	PopGen
GCST90133267-1	Univariate microbial feature (asv: asv053) at the dorsal forearm (dry skin)	European	ASV	113	PopGen
GCST90133267-2	Univariate microbial feature (asv: asv053) at the dorsal forearm (dry skin)	European	ASV	117	PopGen
GCST90133268-1	Univariate microbial feature (asv: asv054) at the dorsal forearm (dry skin)	European	ASV	173	PopGen
GCST90133268-2	Univariate microbial feature (asv: asv054) at the dorsal forearm (dry skin)	European	ASV	162	PopGen
GCST90133269-1	Univariate microbial feature (asv: asv057) at the dorsal forearm (dry skin)	European	ASV	135	PopGen
GCST90133269-2	Univariate microbial feature (asv: asv057) at the dorsal forearm (dry skin)	European	ASV	135	PopGen
GCST90133270-2	Univariate microbial feature (asv: asv059) at the dorsal forearm (dry skin)	European	ASV	104	PopGen
GCST90133271-1	Univariate microbial feature (asv: asv061) at the dorsal forearm (dry skin)	European	ASV	136	PopGen
GCST90133271-2	Univariate microbial feature (asv: asv061) at the dorsal forearm (dry skin)	European	ASV	121	PopGen
GCST90133272-1	Univariate microbial feature (asv: asv063) at the dorsal forearm (dry skin)	European	ASV	106	PopGen
GCST90133272-2	Univariate microbial feature (asv: asv063) at the dorsal forearm (dry skin)	European	ASV	127	PopGen
GCST90133273-1	Univariate microbial feature (asv: asv065) at the dorsal forearm (dry skin)	European	ASV	116	PopGen
GCST90133273-2	Univariate microbial feature (asv: asv065) at the dorsal forearm (dry skin)	European	ASV	133	PopGen
GCST90133274-1	Univariate microbial feature (asv: asv070) at the dorsal forearm (dry skin)	European	ASV	151	PopGen
GCST90133274-2	Univariate microbial feature (asv: asv070) at the dorsal forearm (dry skin)	European	ASV	150	PopGen
GCST90133275-1	Univariate microbial feature (asv: asv076) at the dorsal forearm (dry skin)	European	ASV	115	PopGen
GCST90133275-2	Univariate microbial feature (asv: asv076) at the dorsal forearm (dry skin)	European	ASV	119	PopGen
GCST90133276-1	Univariate microbial feature (asv: asv086) at the dorsal forearm (dry skin)	European	ASV	124	PopGen
GCST90133276-2	Univariate microbial feature (asv: asv086) at the dorsal forearm (dry skin)	European	ASV	131	PopGen
GCST90133277-1	Univariate microbial feature (order: clostridiales) at the dorsal forearm (dry skin)	European	Order	241	PopGen
GCST90133277-2	Univariate microbial feature (order: clostridiales) at the dorsal forearm (dry skin)	European	Order	238	PopGen
GCST90133278-1	Univariate microbial feature (asv: asv092) at the dorsal forearm (dry skin)	European	ASV	128	PopGen
GCST90133278-2	Univariate microbial feature (asv: asv092) at the dorsal forearm (dry skin)	European	ASV	135	PopGen
GCST90133279-1	Univariate microbial feature (asv: asv100) at the dorsal forearm (dry skin)	European	ASV	126	PopGen
GCST90133279-2	Univariate microbial feature (asv: asv100) at the dorsal forearm (dry skin)	European	ASV	123	PopGen
GCST90133280-1	Univariate microbial feature (asv: asv114) at the dorsal forearm (dry skin)	European	ASV	108	PopGen
GCST90133280-2	Univariate microbial feature (asv: asv114) at the dorsal forearm (dry skin)	European	ASV	121	PopGen
GCST90133281-1	Univariate microbial feature (order: actinomycetales) at the antecubital fossa (moist skin)	European	Order	318	KORA FF4
GCST90133281-2	Univariate microbial feature (order: actinomycetales) at the antecubital fossa (moist skin)	European	Order	258	PopGen
GCST90133282-1	Univariate microbial feature (class: bacilli) at the antecubital fossa (moist skin)	European	Class	317	KORA FF4
GCST90133282-2	Univariate microbial feature (class: bacilli) at the antecubital fossa (moist skin)	European	Class	258	PopGen
GCST90133283-1	Univariate microbial feature (phylum: proteobacteria) at the antecubital fossa (moist skin)	European	Phylum	318	KORA FF4
GCST90133283-2	Univariate microbial feature (phylum: proteobacteria) at the antecubital fossa (moist skin)	European	Phylum	258	PopGen
GCST90133284-1	Univariate microbial feature (phylum: bacteroidetes) at the antecubital fossa (moist skin)	European	Phylum	286	KORA FF4
GCST90133284-2	Univariate microbial feature (phylum: bacteroidetes) at the antecubital fossa (moist skin)	European	Phylum	222	PopGen
GCST90133285-1	Univariate microbial feature (order: clostridiales) at the antecubital fossa (moist skin)	European	Order	188	KORA FF4
GCST90133285-2	Univariate microbial feature (order: clostridiales) at the antecubital fossa (moist skin)	European	Order	194	PopGen
GCST90133286-1	Univariate microbial feature (class: betaproteobacteria) at the antecubital fossa (moist skin)	European	Class	304	KORA FF4
GCST90133286-2	Univariate microbial feature (class: betaproteobacteria) at the antecubital fossa (moist skin)	European	Class	244	PopGen
GCST90133287-1	Univariate microbial feature (class: gammaproteobacteria) at the antecubital fossa (moist skin)	European	Class	310	KORA FF4
GCST90133287-2	Univariate microbial feature (class: gammaproteobacteria) at the antecubital fossa (moist skin)	European	Class	254	PopGen
GCST90133288-1	Univariate microbial feature (class: betaproteobacteria) at the dorsal forearm (dry skin)	European	Class	243	PopGen
GCST90133288-2	Univariate microbial feature (class: betaproteobacteria) at the dorsal forearm (dry skin)	European	Class	234	PopGen
GCST90133289-1	Univariate microbial feature (family: flavobacteriaceae) at the antecubital fossa (moist skin)	European	Family	277	KORA FF4
GCST90133289-2	Univariate microbial feature (family: flavobacteriaceae) at the antecubital fossa (moist skin)	European	Family	186	PopGen
GCST90133290-1	Univariate microbial feature (class: alphaproteobacteria) at the antecubital fossa (moist skin)	European	Class	270	KORA FF4
GCST90133290-2	Univariate microbial feature (class: alphaproteobacteria) at the antecubital fossa (moist skin)	European	Class	199	PopGen
GCST90133291-1	Univariate microbial feature (genus: bacteroides) at the antecubital fossa (moist skin)	European	Genus	130	KORA FF4
GCST90133291-2	Univariate microbial feature (genus: bacteroides) at the antecubital fossa (moist skin)	European	Genus	167	PopGen
GCST90133292-1	Univariate microbial feature (asv: asv070) at the antecubital fossa (moist skin)	European	ASV	114	KORA FF4
GCST90133292-2	Univariate microbial feature (asv: asv070) at the antecubital fossa (moist skin)	European	ASV	112	PopGen
GCST90133293-1	Univariate microbial feature (genus: staphylococcus) at the antecubital fossa (moist skin)	European	Genus	317	KORA FF4
GCST90133293-2	Univariate microbial feature (genus: staphylococcus) at the antecubital fossa (moist skin)	European	Genus	258	PopGen
GCST90133294-1	Univariate microbial feature (order: burkholderiales) at the antecubital fossa (moist skin)	European	Order	293	KORA FF4
GCST90133294-2	Univariate microbial feature (order: burkholderiales) at the antecubital fossa (moist skin)	European	Order	218	PopGen
GCST90133295-1	Univariate microbial feature (order: pseudomonadales) at the antecubital fossa (moist skin)	European	Order	304	KORA FF4
GCST90133295-2	Univariate microbial feature (order: pseudomonadales) at the antecubital fossa (moist skin)	European	Order	245	PopGen
GCST90133296-1	Univariate microbial feature (family: neisseriaceae) at the antecubital fossa (moist skin)	European	Family	211	KORA FF4
GCST90133296-2	Univariate microbial feature (family: neisseriaceae) at the antecubital fossa (moist skin)	European	Family	186	PopGen
GCST90133297-1	Univariate microbial feature (order: lactobacillales) at the antecubital fossa (moist skin)	European	Order	274	KORA FF4
GCST90133297-2	Univariate microbial feature (order: lactobacillales) at the antecubital fossa (moist skin)	European	Order	216	PopGen
GCST90133298-1	Univariate microbial feature (family: rhodobacteraceae) at the antecubital fossa (moist skin)	European	Family	180	KORA FF4
GCST90133298-2	Univariate microbial feature (family: rhodobacteraceae) at the antecubital fossa (moist skin)	European	Family	199	PopGen
GCST90133299-1	Univariate microbial feature (class: gammaproteobacteria) at the dorsal forearm (dry skin)	European	Class	259	PopGen
GCST90133299-2	Univariate microbial feature (class: gammaproteobacteria) at the dorsal forearm (dry skin)	European	Class	251	PopGen
GCST90133300-1	Univariate microbial feature (asv: asv001) at the antecubital fossa (moist skin)	European	ASV	318	KORA FF4
GCST90133300-2	Univariate microbial feature (asv: asv001) at the antecubital fossa (moist skin)	European	ASV	258	PopGen
GCST90133301-1	Univariate microbial feature (genus: corynebacterium) at the antecubital fossa (moist skin)	European	Genus	304	KORA FF4
GCST90133301-2	Univariate microbial feature (genus: corynebacterium) at the antecubital fossa (moist skin)	European	Genus	258	PopGen
GCST90133302-1	Univariate microbial feature (family: clostridiales) at the incertae (moist skin)	European	Family	188	KORA FF4
GCST90133302-2	Univariate microbial feature (family: clostridiales) at the incertae (moist skin)	European	Family	175	PopGen
GCST90133303-1	Univariate microbial feature (asv: asv009) at the antecubital fossa (moist skin)	European	ASV	288	KORA FF4
GCST90133303-2	Univariate microbial feature (asv: asv009) at the antecubital fossa (moist skin)	European	ASV	197	PopGen
GCST90133304-1	Univariate microbial feature (family: moraxellaceae) at the antecubital fossa (moist skin)	European	Family	298	KORA FF4
GCST90133304-2	Univariate microbial feature (family: moraxellaceae) at the antecubital fossa (moist skin)	European	Family	245	PopGen
GCST90133305-1	Univariate microbial feature (family: micrococcaceae) at the antecubital fossa (moist skin)	European	Family	255	KORA FF4
GCST90133305-2	Univariate microbial feature (family: micrococcaceae) at the antecubital fossa (moist skin)	European	Family	236	PopGen
GCST90133306-1	Univariate microbial feature (family: streptococcaceae) at the antecubital fossa (moist skin)	European	Family	254	KORA FF4
GCST90133306-2	Univariate microbial feature (family: streptococcaceae) at the antecubital fossa (moist skin)	European	Family	216	PopGen
GCST90133307-1	Univariate microbial feature (genus: enhydrobacter) at the antecubital fossa (moist skin)	European	Genus	237	KORA FF4
GCST90133307-2	Univariate microbial feature (genus: enhydrobacter) at the antecubital fossa (moist skin)	European	Genus	231	PopGen
GCST90133308-1	Univariate microbial feature (genus: micrococcus) at the antecubital fossa (moist skin)	European	Genus	203	KORA FF4
GCST90133308-2	Univariate microbial feature (genus: micrococcus) at the antecubital fossa (moist skin)	European	Genus	196	PopGen
GCST90133309-1	Univariate microbial feature (genus: streptococcus) at the antecubital fossa (moist skin)	European	Genus	253	KORA FF4
GCST90133309-2	Univariate microbial feature (genus: streptococcus) at the antecubital fossa (moist skin)	European	Genus	207	PopGen
GCST90133310-1	Univariate microbial feature (family: flavobacteriaceae) at the dorsal forearm (dry skin)	European	Family	208	PopGen
GCST90133310-2	Univariate microbial feature (family: flavobacteriaceae) at the dorsal forearm (dry skin)	European	Family	196	PopGen
GCST90133311-1	Multivariate microbial feature (beta-diversity) at the antecubital fossa (moist skin)	European	beta_diversity	318	KORA FF4
GCST90133311-2	Multivariate microbial feature (beta-diversity) at the antecubital fossa (moist skin)	European	beta_diversity	258	PopGen
GCST90133313-1	Multivariate microbial feature (beta-diversity) at the forehead (sebaceous skin)	European	beta_diversity	252	PopGen
GCST90133313-2	Multivariate microbial feature (beta-diversity) at the forehead (sebaceous skin)	European	beta_diversity	317	KORA FF4

## Sheet: ST2
Supplement Tabel 2: SNPs used as instrumental variables from skin microbiome and psoriasis GWASs
SNP	effect_allele.exposure	other_allele.exposure	effect_allele.outcome	other_allele.outcome	beta.exposure	beta.outcome	eaf.exposure	eaf.outcome	remove	palindromic	ambiguous	chr	pos	se.outcome	samplesize.outcome	pval.outcome	outcome	chr.exposure	pos.exposure	se.exposure	pval.exposure	samplesize.exposure	exposure	action	mr_keep	R2	F_stat
rs11646200	G	A	G	A	0.667922	0.135309	0.702899	0.819137	FALSE	FALSE	FALSE	16	84302146	0.0933966	397953	0.147406	Guttate psoriasis || id:finngen_R10_L12_PSORI_GUTTATE	16	84335752	0.130705	1.06832e-06	138	Genus_Chryseobacterium_Antecubitalfossa_Moist_KORAFF4 || id:GCST90133164-1	2	TRUE	0.159119	25.735
rs12515495	A	G	A	G	-0.621405	-0.0126919	0.704225	0.628402	FALSE	FALSE	FALSE	5	115984410	0.0745837	397953	0.864877	Guttate psoriasis || id:finngen_R10_L12_PSORI_GUTTATE	5	115320107	0.117256	4.40912e-07	142	Genus_Chryseobacterium_Antecubitalfossa_Moist_KORAFF4 || id:GCST90133164-1	2	TRUE	0.165126	27.69
rs1426471	C	T	C	T	0.765605	0.0658493	0.855634	0.875887	FALSE	FALSE	FALSE	7	136257651	0.108862	397953	0.545254	Guttate psoriasis || id:finngen_R10_L12_PSORI_GUTTATE	7	135942399	0.160728	4.70421e-06	142	Genus_Chryseobacterium_Antecubitalfossa_Moist_KORAFF4 || id:GCST90133164-1	2	TRUE	0.137771	22.3699
rs1496033	T	C	T	C	-0.582204	0.00950408	0.625	0.545236	FALSE	FALSE	FALSE	6	147350697	0.0723176	397953	0.895442	Guttate psoriasis || id:finngen_R10_L12_PSORI_GUTTATE	6	147671833	0.120958	3.84634e-06	140	Genus_Chryseobacterium_Antecubitalfossa_Moist_KORAFF4 || id:GCST90133164-1	2	TRUE	0.141987	22.8367
rs1569814	T	C	T	C	-0.699088	0.0243296	0.822695	0.725213	FALSE	FALSE	FALSE	20	15637185	0.0805682	397953	0.762671	Guttate psoriasis || id:finngen_R10_L12_PSORI_GUTTATE	20	15617830	0.147986	5.59279e-06	141	Genus_Chryseobacterium_Antecubitalfossa_Moist_KORAFF4 || id:GCST90133164-1	2	TRUE	0.136645	21.9997
rs35079835	T	C	T	C	-0.968924	0.107054	0.912409	0.913068	FALSE	FALSE	FALSE	1	84767500	0.127544	397953	0.401273	Guttate psoriasis || id:finngen_R10_L12_PSORI_GUTTATE	1	85233183	0.210286	9.32118e-06	137	Genus_Chryseobacterium_Antecubitalfossa_Moist_KORAFF4 || id:GCST90133164-1	2	TRUE	0.134174	20.9205
rs67293833	A	C	A	C	-1.44357	-0.0664439	0.957447	0.898382	FALSE	FALSE	FALSE	15	60050655	0.119061	397953	0.576801	Guttate psoriasis || id:finngen_R10_L12_PSORI_GUTTATE	15	60342854	0.273282	4.80967e-07	141	Genus_Chryseobacterium_Antecubitalfossa_Moist_KORAFF4 || id:GCST90133164-1	2	TRUE	0.165202	27.5073
rs7152314	C	T	C	T	-0.991937	0.252837	0.919014	0.916931	FALSE	FALSE	FALSE	14	55709294	0.129766	397953	0.0513665	Guttate psoriasis || id:finngen_R10_L12_PSORI_GUTTATE	14	56176012	0.211239	6.26616e-06	142	Genus_Chryseobacterium_Antecubitalfossa_Moist_KORAFF4 || id:GCST90133164-1	2	TRUE	0.134413	21.74
rs74132009	T	G	T	G	-0.904896	0.179002	0.910714	0.935135	FALSE	FALSE	FALSE	10	51420462	0.147828	397953	0.22594	Guttate psoriasis || id:finngen_R10_L12_PSORI_GUTTATE	10	53180222	0.196121	8.9317e-06	140	Genus_Chryseobacterium_Antecubitalfossa_Moist_KORAFF4 || id:GCST90133164-1	2	TRUE	0.131991	20.9845
rs79777996	C	T	C	T	-1.11713	-0.0683312	0.938462	0.930408	FALSE	FALSE	FALSE	5	105657094	0.142268	397953	0.631015	Guttate psoriasis || id:finngen_R10_L12_PSORI_GUTTATE	5	104992795	0.239871	7.9108e-06	130	Genus_Chryseobacterium_Antecubitalfossa_Moist_KORAFF4 || id:GCST90133164-1	2	TRUE	0.142987	21.356
rs79778624	A	G	A	G	-1.0081	0.165135	0.929078	0.965465	FALSE	FALSE	FALSE	3	61078195	0.197578	397953	0.403269	Guttate psoriasis || id:finngen_R10_L12_PSORI_GUTTATE	3	61063868	0.211638	4.73253e-06	141	Genus_Chryseobacterium_Antecubitalfossa_Moist_KORAFF4 || id:GCST90133164-1	2	TRUE	0.138612	22.3674
rs11643968	G	A	G	A	-0.666472	-0.0545241	0.818841	0.712569	FALSE	FALSE	FALSE	16	84258409	0.0798494	397953	0.494709	Guttate psoriasis || id:finngen_R10_L12_PSORI_GUTTATE	16	84292015	0.142171	6.6302e-06	138	Genus_Chryseobacterium_Antecubitalfossa_Moist_PopGen || id:GCST90133164-2	2	TRUE	0.137369	21.6572
rs11742607	A	G	A	G	-0.593827	-0.0358041	0.746377	0.786783	FALSE	FALSE	FALSE	5	173539048	0.0880887	397953	0.684408	Guttate psoriasis || id:finngen_R10_L12_PSORI_GUTTATE	5	172966051	0.127046	7.02367e-06	138	Genus_Chryseobacterium_Antecubitalfossa_Moist_PopGen || id:GCST90133164-2	2	TRUE	0.136675	21.5305
rs1350519	G	A	G	A	-0.644135	0.114682	0.75	0.734006	FALSE	FALSE	FALSE	12	75187221	0.0814336	397953	0.159045	Guttate psoriasis || id:finngen_R10_L12_PSORI_GUTTATE	12	75581001	0.138013	7.22974e-06	138	Genus_Chryseobacterium_Antecubitalfossa_Moist_PopGen || id:GCST90133164-2	2	TRUE	0.136327	21.467
rs28794896	G	A	G	A	-1.16864	0.1566	0.945652	0.945804	FALSE	FALSE	FALSE	18	3144150	0.158872	397953	0.32428	Guttate psoriasis || id:finngen_R10_L12_PSORI_GUTTATE	18	3144148	0.252015	8.1964e-06	138	Genus_Chryseobacterium_Antecubitalfossa_Moist_PopGen || id:GCST90133164-2	2	TRUE	0.134815	21.1919
rs3779412	T	C	T	C	-0.95953	0.0949526	0.902174	0.895233	FALSE	FALSE	FALSE	7	74210798	0.116801	397953	0.41625	Guttate psoriasis || id:finngen_R10_L12_PSORI_GUTTATE	7	73625128	0.177393	2.76913e-07	138	Genus_Chryseobacterium_Antecubitalfossa_Moist_PopGen || id:GCST90133164-2	2	TRUE	0.174928	28.834
rs4614053	T	C	T	C	0.546075	0.0977256	0.550725	0.546624	FALSE	FALSE	FALSE	9	8726343	0.0724188	397953	0.177192	Guttate psoriasis || id:finngen_R10_L12_PSORI_GUTTATE	9	8726343	0.110212	2.11522e-06	138	Genus_Chryseobacterium_Antecubitalfossa_Moist_PopGen || id:GCST90133164-2	2	TRUE	0.15103	24.194
rs58092190	C	T	C	T	-0.816789	0.0880136	0.894928	0.9137	FALSE	FALSE	FALSE	13	26860278	0.128347	397953	0.492871	Guttate psoriasis || id:finngen_R10_L12_PSORI_GUTTATE	13	27434415	0.177887	9.9072e-06	138	Genus_Chryseobacterium_Antecubitalfossa_Moist_PopGen || id:GCST90133164-2	2	TRUE	0.132529	20.7775
rs6842379	T	C	T	C	0.534112	-0.0405028	0.496377	0.57422	FALSE	FALSE	FALSE	4	79685589	0.0730487	397953	0.579262	Guttate psoriasis || id:finngen_R10_L12_PSORI_GUTTATE	4	80606743	0.106652	1.67653e-06	138	Genus_Chryseobacterium_Antecubitalfossa_Moist_PopGen || id:GCST90133164-2	2	TRUE	0.153789	24.7164
rs75794610	C	A	C	A	-1.14969	-0.0410812	0.934783	0.95694	FALSE	FALSE	FALSE	3	12087576	0.177116	397953	0.816581	Guttate psoriasis || id:finngen_R10_L12_PSORI_GUTTATE	3	12129076	0.230452	1.82285e-06	138	Genus_Chryseobacterium_Antecubitalfossa_Moist_PopGen || id:GCST90133164-2	2	TRUE	0.152796	24.5281
rs7605658	C	T	C	T	-0.577245	-0.124816	0.550725	0.568703	FALSE	FALSE	FALSE	2	45183783	0.0732689	397953	0.0884667	Guttate psoriasis || id:finngen_R10_L12_PSORI_GUTTATE	2	45410922	0.113037	1.08474e-06	138	Genus_Chryseobacterium_Antecubitalfossa_Moist_PopGen || id:GCST90133164-2	2	TRUE	0.158939	25.7004
rs9490285	T	C	T	C	0.77701	0.097788	0.851449	0.883178	FALSE	FALSE	FALSE	6	121470947	0.111261	397953	0.379452	Guttate psoriasis || id:finngen_R10_L12_PSORI_GUTTATE	6	121792093	0.165738	6.62032e-06	138	Genus_Chryseobacterium_Antecubitalfossa_Moist_PopGen || id:GCST90133164-2	2	TRUE	0.137387	21.6604
rs1028134	T	C	T	C	-0.628993	-0.267832	0.891051	0.896132	FALSE	FALSE	FALSE	16	27117364	0.107191	397953	0.0124669	Guttate psoriasis || id:finngen_R10_L12_PSORI_GUTTATE	16	27128685	0.129623	2.12556e-06	257	Genus_Acinetobacter_Antecubitalfossa_Moist_KORAFF4 || id:GCST90133165-1	2	TRUE	0.0839304	23.3631
rs145093695	C	T	C	T	-0.606542	-0.0333934	0.866667	0.837396	FALSE	FALSE	FALSE	6	131325769	0.0974932	397953	0.731959	Guttate psoriasis || id:finngen_R10_L12_PSORI_GUTTATE	6	131646909	0.130782	5.6504e-06	255	Genus_Acinetobacter_Antecubitalfossa_Moist_KORAFF4 || id:GCST90133165-1	2	TRUE	0.0777883	21.3405
rs6027039	C	T	C	T	-0.428276	0.0460533	0.730189	0.721058	FALSE	FALSE	FALSE	20	38649915	0.0799977	397953	0.56483	Guttate psoriasis || id:finngen_R10_L12_PSORI_GUTTATE	20	37278558	0.0918919	5.01426e-06	265	Genus_Acinetobacter_Antecubitalfossa_Moist_KORAFF4 || id:GCST90133165-1	2	TRUE	0.0757589	21.5578
rs7138651	G	A	G	A	0.456525	0.0556324	0.709924	0.805196	FALSE	FALSE	FALSE	12	81859836	0.0910698	397953	0.541281	Guttate psoriasis || id:finngen_R10_L12_PSORI_GUTTATE	12	82253615	0.0937787	1.95714e-06	262	Genus_Acinetobacter_Antecubitalfossa_Moist_KORAFF4 || id:GCST90133165-1	2	TRUE	0.0829494	23.5176
rs72978489	A	T	A	T	0.833633	0.2835	0.94186	0.967072	FALSE	TRUE	FALSE	4	157090718	0.204818	397953	0.166311	Guttate psoriasis || id:finngen_R10_L12_PSORI_GUTTATE	4	158011870	0.177532	4.33649e-06	258	Genus_Acinetobacter_Antecubitalfossa_Moist_KORAFF4 || id:GCST90133165-1	2	TRUE	0.0787338	21.8784
rs1026059	A	G	A	G	0.487648	-0.0297272	0.608374	0.65544	FALSE	FALSE	FALSE	12	127312430	0.0757183	397953	0.694613	Guttate psoriasis || id:finngen_R10_L12_PSORI_GUTTATE	12	127796975	0.0972471	1.16494e-06	203	Genus_Acinetobacter_Antecubitalfossa_Moist_PopGen || id:GCST90133165-2	2	TRUE	0.110217	24.8977
rs10411016	G	T	G	T	0.426591	-0.150164	0.541872	0.537296	FALSE	FALSE	FALSE	19	7680157	0.0723925	397953	0.0380505	Guttate psoriasis || id:finngen_R10_L12_PSORI_GUTTATE	19	7745043	0.0926989	7.408e-06	203	Genus_Acinetobacter_Antecubitalfossa_Moist_PopGen || id:GCST90133165-2	2	TRUE	0.0944674	20.9688
rs1045502	G	A	G	A	-0.807112	-0.225905	0.923645	0.870519	FALSE	FALSE	FALSE	11	252818	0.10753	397953	0.0356533	Guttate psoriasis || id:finngen_R10_L12_PSORI_GUTTATE	11	252818	0.177664	9.56004e-06	203	Genus_Acinetobacter_Antecubitalfossa_Moist_PopGen || id:GCST90133165-2	2	TRUE	0.0922828	20.4346
rs116626252	G	T	G	T	-0.702901	0.0253039	0.884236	0.900045	FALSE	FALSE	FALSE	2	115566882	0.121255	397953	0.834696	Guttate psoriasis || id:finngen_R10_L12_PSORI_GUTTATE	2	116324458	0.152812	7.47656e-06	203	Genus_Acinetobacter_Antecubitalfossa_Moist_PopGen || id:GCST90133165-2	2	TRUE	0.0943886	20.9495
rs1588687	A	G	A	G	0.493178	-0.0175712	0.704433	0.778837	FALSE	FALSE	FALSE	12	17288543	0.0867421	397953	0.839473	Guttate psoriasis || id:finngen_R10_L12_PSORI_GUTTATE	12	17441477	0.107499	7.8779e-06	203	Genus_Acinetobacter_Antecubitalfossa_Moist_PopGen || id:GCST90133165-2	2	TRUE	0.0939409	20.8398
rs3012557	A	G	A	G	-0.502324	0.117973	0.665025	0.611478	FALSE	FALSE	FALSE	6	73862086	0.0737154	397953	0.109512	Guttate psoriasis || id:finngen_R10_L12_PSORI_GUTTATE	6	74571797	0.107426	5.35897e-06	203	Genus_Acinetobacter_Antecubitalfossa_Moist_PopGen || id:GCST90133165-2	2	TRUE	0.0972366	21.6497
rs6832067	T	C	T	C	0.466514	-0.0768358	0.593596	0.529138	FALSE	FALSE	FALSE	4	186402766	0.0723595	397953	0.288298	Guttate psoriasis || id:finngen_R10_L12_PSORI_GUTTATE	4	187323920	0.097513	3.31931e-06	203	Genus_Acinetobacter_Antecubitalfossa_Moist_PopGen || id:GCST90133165-2	2	TRUE	0.101324	22.6623
rs7084649	T	C	T	C	-0.845772	-0.0174578	0.933498	0.952964	FALSE	FALSE	FALSE	10	95411774	0.171327	397953	0.918838	Guttate psoriasis || id:finngen_R10_L12_PSORI_GUTTATE	10	97171531	0.17982	4.74929e-06	203	Genus_Acinetobacter_Antecubitalfossa_Moist_PopGen || id:GCST90133165-2	2	TRUE	0.0982682	21.9044
rs10132025	G	A	G	A	-0.617809	-0.00226496	0.828652	0.847024	FALSE	FALSE	FALSE	14	33323423	0.100161	397953	0.981959	Guttate psoriasis || id:finngen_R10_L12_PSORI_GUTTATE	14	33792629	0.133178	6.8107e-06	178	Genus_Paracoccus_Antecubitalfossa_Moist_KORAFF4 || id:GCST90133166-1	2	TRUE	0.107859	21.2783
rs118128871	A	C	A	C	-0.957354	-0.0139256	0.936416	0.964215	FALSE	FALSE	FALSE	8	64955211	0.19531	397953	0.943159	Guttate psoriasis || id:finngen_R10_L12_PSORI_GUTTATE	8	65867446	0.204565	5.81229e-06	173	Genus_Paracoccus_Antecubitalfossa_Moist_KORAFF4 || id:GCST90133166-1	2	TRUE	0.112374	21.6487
rs1991250	T	C	T	C	-0.482753	-0.00299641	0.641618	0.640859	FALSE	FALSE	FALSE	15	59947613	0.0750273	397953	0.968143	Guttate psoriasis || id:finngen_R10_L12_PSORI_GUTTATE	15	60239812	0.10437	7.35012e-06	173	Genus_Paracoccus_Antecubitalfossa_Moist_KORAFF4 || id:GCST90133166-1	2	TRUE	0.110057	21.1471
rs2176664	C	T	C	T	-0.52228	0.00477785	0.716667	0.61484	FALSE	FALSE	FALSE	17	12616554	0.0739421	397953	0.94848	Guttate psoriasis || id:finngen_R10_L12_PSORI_GUTTATE	17	12519871	0.113884	8.49046e-06	180	Genus_Paracoccus_Antecubitalfossa_Moist_KORAFF4 || id:GCST90133166-1	2	TRUE	0.10462	20.7983
rs2767625	A	G	A	G	0.558512	-0.0614671	0.535928	0.366378	FALSE	FALSE	FALSE	10	29969685	0.0747115	397953	0.410663	Guttate psoriasis || id:finngen_R10_L12_PSORI_GUTTATE	10	30258614	0.109799	9.81757e-07	167	Genus_Paracoccus_Antecubitalfossa_Moist_KORAFF4 || id:GCST90133166-1	2	TRUE	0.134151	25.5643
rs759572	C	T	C	T	0.521608	-0.0421455	0.636111	0.523835	FALSE	FALSE	FALSE	12	97089257	0.0720159	397953	0.558397	Guttate psoriasis || id:finngen_R10_L12_PSORI_GUTTATE	12	97483035	0.110784	5.00675e-06	180	Genus_Paracoccus_Antecubitalfossa_Moist_KORAFF4 || id:GCST90133166-1	2	TRUE	0.109653	21.922
rs113280186	A	C	A	C	-0.662469	0.0067129	0.872283	0.887928	FALSE	FALSE	FALSE	9	18218509	0.114272	397953	0.953155	Guttate psoriasis || id:finngen_R10_L12_PSORI_GUTTATE	9	18218507	0.141997	5.95156e-06	184	Genus_Paracoccus_Antecubitalfossa_Moist_PopGen || id:GCST90133166-2	2	TRUE	0.10578	21.5292
rs11711418	G	A	G	A	-0.453469	0.0896657	0.535326	0.524612	FALSE	FALSE	FALSE	3	8498999	0.072211	397953	0.21434	Guttate psoriasis || id:finngen_R10_L12_PSORI_GUTTATE	3	8540685	0.0994445	9.36987e-06	184	Genus_Paracoccus_Antecubitalfossa_Moist_PopGen || id:GCST90133166-2	2	TRUE	0.101535	20.5678
rs12537030	A	G	A	G	0.72322	-0.105852	0.869565	0.877682	FALSE	FALSE	FALSE	7	116191853	0.109559	397953	0.333963	Guttate psoriasis || id:finngen_R10_L12_PSORI_GUTTATE	7	115831907	0.151734	3.82582e-06	184	Genus_Paracoccus_Antecubitalfossa_Moist_PopGen || id:GCST90133166-2	2	TRUE	0.1099	22.4714
rs1565556	C	T	C	T	-0.511289	0.0711227	0.722826	0.716095	FALSE	FALSE	FALSE	3	70547534	0.0797926	397953	0.372744	Guttate psoriasis || id:finngen_R10_L12_PSORI_GUTTATE	3	70596685	0.105329	2.59106e-06	184	Genus_Paracoccus_Antecubitalfossa_Moist_PopGen || id:GCST90133166-2	2	TRUE	0.113523	23.3071
rs35978580	G	A	G	A	-0.67742	0.0439287	0.861413	0.808046	FALSE	FALSE	FALSE	15	80737220	0.0910118	397953	0.629329	Guttate psoriasis || id:finngen_R10_L12_PSORI_GUTTATE	15	81029561	0.141851	3.67365e-06	184	Genus_Paracoccus_Antecubitalfossa_Moist_PopGen || id:GCST90133166-2	2	TRUE	0.110278	22.5582
rs453604	A	G	A	G	-0.639573	0.133945	0.820652	0.78836	FALSE	FALSE	FALSE	1	40344186	0.0881654	397953	0.1287	Guttate psoriasis || id:finngen_R10_L12_PSORI_GUTTATE	1	40809858	0.127676	1.28594e-06	184	Genus_Paracoccus_Antecubitalfossa_Moist_PopGen || id:GCST90133166-2	2	TRUE	0.120012	24.8209
rs7582082	A	C	A	C	0.479833	-0.0370481	0.57337	0.521301	FALSE	FALSE	FALSE	2	138221758	0.0722084	397953	0.607901	Guttate psoriasis || id:finngen_R10_L12_PSORI_GUTTATE	2	138979328	0.0981613	2.22519e-06	184	Genus_Paracoccus_Antecubitalfossa_Moist_PopGen || id:GCST90133166-2	2	TRUE	0.114936	23.6348
rs7914010	G	C	G	C	0.492084	-0.0924312	0.600543	0.617574	FALSE	TRUE	FALSE	10	88100671	0.0742908	397953	0.213433	Guttate psoriasis || id:finngen_R10_L12_PSORI_GUTTATE	10	89860428	0.102809	3.50233e-06	184	Genus_Paracoccus_Antecubitalfossa_Moist_PopGen || id:GCST90133166-2	2	TRUE	0.110722	22.6604
rs9394726	G	A	G	A	-0.868284	-0.00147892	0.915761	0.895731	FALSE	FALSE	FALSE	6	40742640	0.11706	397953	0.98992	Guttate psoriasis || id:finngen_R10_L12_PSORI_GUTTATE	6	40710379	0.168678	6.80178e-07	184	Genus_Paracoccus_Antecubitalfossa_Moist_PopGen || id:GCST90133166-2	2	TRUE	0.125881	26.2096
rs10433290	G	A	G	A	-0.613774	-0.0127073	0.828804	0.770112	FALSE	FALSE	FALSE	22	17545891	0.0856822	397953	0.882101	Guttate psoriasis || id:finngen_R10_L12_PSORI_GUTTATE	22	18025580	0.125404	2.16432e-06	184	Genus_Rothia_Antecubitalfossa_Moist_PopGen || id:GCST90133167-2	2	TRUE	0.115193	23.6946
rs11044406	G	A	G	A	-0.943457	-0.03593	0.940217	0.909758	FALSE	FALSE	FALSE	12	19083553	0.126035	397953	0.775582	Guttate psoriasis || id:finngen_R10_L12_PSORI_GUTTATE	12	19236487	0.203148	6.52471e-06	184	Genus_Rothia_Antecubitalfossa_Moist_PopGen || id:GCST90133167-2	2	TRUE	0.104921	21.334
rs1563054	T	C	T	C	0.576221	0.183486	0.758152	0.763932	FALSE	FALSE	FALSE	11	44796080	0.0844161	397953	0.0297358	Guttate psoriasis || id:finngen_R10_L12_PSORI_GUTTATE	11	44817630	0.118736	2.6054e-06	184	Genus_Rothia_Antecubitalfossa_Moist_PopGen || id:GCST90133167-2	2	TRUE	0.113472	23.2953
rs8074279	C	T	C	T	0.468643	0.129779	0.619565	0.728843	FALSE	FALSE	FALSE	17	61717266	0.0806249	397953	0.107472	Guttate psoriasis || id:finngen_R10_L12_PSORI_GUTTATE	17	59794627	0.100347	5.82728e-06	184	Genus_Rothia_Antecubitalfossa_Moist_PopGen || id:GCST90133167-2	2	TRUE	0.105977	21.5741
rs9820287	C	T	C	T	-0.558929	-0.0297538	0.798913	0.821152	FALSE	FALSE	FALSE	3	133165906	0.0936843	397953	0.750791	Guttate psoriasis || id:finngen_R10_L12_PSORI_GUTTATE	3	132884750	0.11888	5.08253e-06	184	Genus_Rothia_Antecubitalfossa_Moist_PopGen || id:GCST90133167-2	2	TRUE	0.107253	21.8651
rs12440581	G	A	G	A	0.422764	-0.0750258	0.53373	0.557143	FALSE	FALSE	FALSE	15	33656462	0.0722935	397953	0.299366	Guttate psoriasis || id:finngen_R10_L12_PSORI_GUTTATE	15	33948663	0.087947	2.64622e-06	252	Genus_Staphylococcus_Forehead_Sebaceous_PopGen || id:GCST90133199-1	2	TRUE	0.0839947	22.9242
rs12622075	T	C	T	C	0.492211	0.0797969	0.77381	0.76943	FALSE	FALSE	FALSE	2	179259177	0.0852921	397953	0.349493	Guttate psoriasis || id:finngen_R10_L12_PSORI_GUTTATE	2	180123904	0.106381	5.96361e-06	252	Genus_Staphylococcus_Forehead_Sebaceous_PopGen || id:GCST90133199-1	2	TRUE	0.0783007	21.2381
rs2144125	G	A	G	A	0.7163	-0.112563	0.920635	0.878838	FALSE	FALSE	FALSE	20	8693359	0.11002	397953	0.306253	Guttate psoriasis || id:finngen_R10_L12_PSORI_GUTTATE	20	8674006	0.157623	8.58374e-06	252	Genus_Staphylococcus_Forehead_Sebaceous_PopGen || id:GCST90133199-1	2	TRUE	0.0757426	20.4874
rs2443768	A	C	A	C	-0.591699	-0.111966	0.871032	0.920985	FALSE	FALSE	FALSE	5	21701728	0.133487	397953	0.401593	Guttate psoriasis || id:finngen_R10_L12_PSORI_GUTTATE	5	21701837	0.128874	6.98169e-06	252	Genus_Staphylococcus_Forehead_Sebaceous_PopGen || id:GCST90133199-1	2	TRUE	0.077194	20.9129
rs2463117	T	C	T	C	0.56371	0.118837	0.829365	0.831568	FALSE	FALSE	FALSE	14	61528955	0.0964567	397953	0.217939	Guttate psoriasis || id:finngen_R10_L12_PSORI_GUTTATE	14	61995673	0.117997	3.03033e-06	252	Genus_Staphylococcus_Forehead_Sebaceous_PopGen || id:GCST90133199-1	2	TRUE	0.0830462	22.6419
rs2973139	T	C	T	C	-0.571799	0.0468971	0.825397	0.791811	FALSE	FALSE	FALSE	5	153169261	0.0885906	397953	0.59655	Guttate psoriasis || id:finngen_R10_L12_PSORI_GUTTATE	5	152548821	0.113586	9.19222e-07	252	Genus_Staphylococcus_Forehead_Sebaceous_PopGen || id:GCST90133199-1	2	TRUE	0.0913741	25.1407
rs4665554	C	T	C	T	-0.437931	-0.0818357	0.583333	0.492919	FALSE	FALSE	FALSE	2	23127619	0.0722374	397953	0.257268	Guttate psoriasis || id:finngen_R10_L12_PSORI_GUTTATE	2	23350490	0.085642	6.29529e-07	252	Genus_Staphylococcus_Forehead_Sebaceous_PopGen || id:GCST90133199-1	2	TRUE	0.0940072	25.9404
rs9762321	T	G	T	G	0.465675	0.109558	0.714286	0.666996	FALSE	FALSE	FALSE	4	179986596	0.0767127	397953	0.153246	Guttate psoriasis || id:finngen_R10_L12_PSORI_GUTTATE	4	180907749	0.0974505	3.01329e-06	252	Genus_Staphylococcus_Forehead_Sebaceous_PopGen || id:GCST90133199-1	2	TRUE	0.0830856	22.6536
rs112162072	A	G	A	G	0.740482	0.0274008	0.943548	0.916865	FALSE	FALSE	FALSE	7	20601415	0.131249	397953	0.834628	Guttate psoriasis || id:finngen_R10_L12_PSORI_GUTTATE	7	20641038	0.16096	6.16808e-06	310	Genus_Staphylococcus_Retroauricularfold_Sebaceous_KORAFF4 || id:GCST90133199-2	2	TRUE	0.0639073	21.0272
rs1283671	C	T	C	T	0.552612	-0.0647973	0.873016	0.895314	FALSE	FALSE	FALSE	8	107421459	0.117005	397953	0.579714	Guttate psoriasis || id:finngen_R10_L12_PSORI_GUTTATE	8	108433687	0.116536	3.21998e-06	315	Genus_Staphylococcus_Retroauricularfold_Sebaceous_KORAFF4 || id:GCST90133199-2	2	TRUE	0.0666287	22.3435
rs142690890	C	T	C	T	0.765806	-0.00570441	0.942857	0.927829	FALSE	FALSE	FALSE	13	23310276	0.139553	397953	0.967394	Guttate psoriasis || id:finngen_R10_L12_PSORI_GUTTATE	13	23884415	0.161926	3.41247e-06	315	Genus_Staphylococcus_Retroauricularfold_Sebaceous_KORAFF4 || id:GCST90133199-2	2	TRUE	0.066298	22.2247
rs2013210	A	G	A	G	-0.37162	0.0312598	0.68254	0.698457	FALSE	FALSE	FALSE	18	59479263	0.0782766	397953	0.689635	Guttate psoriasis || id:finngen_R10_L12_PSORI_GUTTATE	18	57146495	0.0823968	9.17334e-06	315	Genus_Staphylococcus_Retroauricularfold_Sebaceous_KORAFF4 || id:GCST90133199-2	2	TRUE	0.0606583	20.2121
rs4959153	A	G	A	G	-0.427495	-0.0909161	0.72293	0.808147	FALSE	FALSE	FALSE	6	1723371	0.0911775	397953	0.3187	Guttate psoriasis || id:finngen_R10_L12_PSORI_GUTTATE	6	1723605	0.0894124	2.6903e-06	314	Genus_Staphylococcus_Retroauricularfold_Sebaceous_KORAFF4 || id:GCST90133199-2	2	TRUE	0.0678604	22.7138
rs61975175	A	G	A	G	0.653722	-0.347895	0.914013	0.930872	FALSE	FALSE	FALSE	13	105829077	0.140581	397953	0.0133349	Guttate psoriasis || id:finngen_R10_L12_PSORI_GUTTATE	13	106481426	0.140864	5.11659e-06	314	Genus_Staphylococcus_Retroauricularfold_Sebaceous_KORAFF4 || id:GCST90133199-2	2	TRUE	0.064187	21.3999
rs62138459	T	C	T	C	-0.497753	0.0302888	0.832797	0.797161	FALSE	FALSE	FALSE	2	47357596	0.0899782	397953	0.7364	Guttate psoriasis || id:finngen_R10_L12_PSORI_GUTTATE	2	47584735	0.101008	1.35796e-06	311	Genus_Staphylococcus_Retroauricularfold_Sebaceous_KORAFF4 || id:GCST90133199-2	2	TRUE	0.0724278	24.1277
rs62275583	C	T	C	T	-0.683464	0.0605637	0.916667	0.874165	FALSE	FALSE	FALSE	3	153201322	0.10924	397953	0.579298	Guttate psoriasis || id:finngen_R10_L12_PSORI_GUTTATE	3	152919111	0.147221	5.12913e-06	306	Genus_Staphylococcus_Retroauricularfold_Sebaceous_KORAFF4 || id:GCST90133199-2	2	TRUE	0.0657976	21.4113
rs73167292	C	T	C	T	0.786664	0.147797	0.92381	0.905205	FALSE	FALSE	FALSE	3	172371155	0.122847	397953	0.228936	Guttate psoriasis || id:finngen_R10_L12_PSORI_GUTTATE	3	172088945	0.147228	1.76192e-07	315	Genus_Staphylococcus_Retroauricularfold_Sebaceous_KORAFF4 || id:GCST90133199-2	2	TRUE	0.0831011	28.3681
rs74538992	A	G	A	G	0.682807	0.0129428	0.928797	0.953932	FALSE	FALSE	FALSE	5	126027010	0.173488	397953	0.94053	Guttate psoriasis || id:finngen_R10_L12_PSORI_GUTTATE	5	125362703	0.149262	6.87874e-06	316	Genus_Staphylococcus_Retroauricularfold_Sebaceous_KORAFF4 || id:GCST90133199-2	2	TRUE	0.0621101	20.7941
rs74962111	G	A	G	A	-0.665159	-0.0437964	0.920886	0.970107	FALSE	FALSE	FALSE	12	73601526	0.21562	397953	0.839042	Guttate psoriasis || id:finngen_R10_L12_PSORI_GUTTATE	12	73995306	0.139926	3.04726e-06	316	Genus_Staphylococcus_Retroauricularfold_Sebaceous_KORAFF4 || id:GCST90133199-2	2	TRUE	0.0667376	22.4542
rs10508687	T	C	T	C	0.949608	0.0335833	0.950397	0.946242	FALSE	FALSE	FALSE	10	25037008	0.160645	397953	0.834407	Guttate psoriasis || id:finngen_R10_L12_PSORI_GUTTATE	10	25325937	0.194377	1.84475e-06	252	Genus_Propionibacterium_Forehead_Sebaceous_PopGen || id:GCST90133201-1	2	TRUE	0.0865166	23.6777
rs10847912	G	T	G	T	-0.418054	0.0778129	0.650794	0.621726	FALSE	FALSE	FALSE	12	129619009	0.0742216	397953	0.29446	Guttate psoriasis || id:finngen_R10_L12_PSORI_GUTTATE	12	130103554	0.0884505	3.81776e-06	252	Genus_Propionibacterium_Forehead_Sebaceous_PopGen || id:GCST90133201-1	2	TRUE	0.0814285	22.1617
rs1549112	C	T	C	T	-0.398624	-0.0854543	0.56746	0.676969	FALSE	FALSE	FALSE	3	175369175	0.0770842	397953	0.26761	Guttate psoriasis || id:finngen_R10_L12_PSORI_GUTTATE	3	175086964	0.0848908	4.38405e-06	252	Genus_Propionibacterium_Forehead_Sebaceous_PopGen || id:GCST90133201-1	2	TRUE	0.0804591	21.8748
rs62086066	C	T	C	T	0.536485	-0.0356598	0.837302	0.872077	FALSE	FALSE	FALSE	18	9432178	0.108272	397953	0.741889	Guttate psoriasis || id:finngen_R10_L12_PSORI_GUTTATE	18	9432176	0.116144	6.17261e-06	252	Genus_Propionibacterium_Forehead_Sebaceous_PopGen || id:GCST90133201-1	2	TRUE	0.0780589	21.167
rs9849313	T	C	T	C	0.449495	-0.0355764	0.686508	0.77281	FALSE	FALSE	FALSE	3	29788384	0.0861214	397953	0.679537	Guttate psoriasis || id:finngen_R10_L12_PSORI_GUTTATE	3	29829875	0.0941435	3.06877e-06	252	Genus_Propionibacterium_Forehead_Sebaceous_PopGen || id:GCST90133201-1	2	TRUE	0.0829579	22.6156
rs1016631	C	G	C	G	0.503772	0.0985	0.846645	0.828112	FALSE	TRUE	FALSE	21	21874511	0.0961318	397953	0.305536	Guttate psoriasis || id:finngen_R10_L12_PSORI_GUTTATE	21	23246831	0.109138	5.73242e-06	313	Genus_Propionibacterium_Retroauricularfold_Sebaceous_KORAFF4 || id:GCST90133201-2	2	TRUE	0.0637337	21.1705
rs12155690	C	T	C	T	0.536922	0.040496	0.826667	0.827719	FALSE	FALSE	FALSE	8	107135804	0.0952107	397953	0.670596	Guttate psoriasis || id:finngen_R10_L12_PSORI_GUTTATE	8	108148032	0.10558	6.4961e-07	300	Genus_Propionibacterium_Retroauricularfold_Sebaceous_KORAFF4 || id:GCST90133201-2	2	TRUE	0.0793638	25.6892
rs13006272	T	C	T	C	0.461005	-0.0925858	0.824921	0.792352	FALSE	FALSE	FALSE	2	106207196	0.0884062	397953	0.294972	Guttate psoriasis || id:finngen_R10_L12_PSORI_GUTTATE	2	106823652	0.0993556	5.11849e-06	317	Genus_Propionibacterium_Retroauricularfold_Sebaceous_KORAFF4 || id:GCST90133201-2	2	TRUE	0.063596	21.3933
rs13320213	C	T	C	T	0.536934	0.0158942	0.835962	0.778591	FALSE	FALSE	FALSE	3	168161920	0.0874608	397953	0.855795	Guttate psoriasis || id:finngen_R10_L12_PSORI_GUTTATE	3	167879708	0.108521	1.22439e-06	317	Genus_Propionibacterium_Retroauricularfold_Sebaceous_KORAFF4 || id:GCST90133201-2	2	TRUE	0.0716888	24.3259
rs141801863	C	T	C	T	0.700061	-0.144625	0.928571	0.955812	FALSE	FALSE	FALSE	11	134600669	0.173546	397953	0.404646	Guttate psoriasis || id:finngen_R10_L12_PSORI_GUTTATE	11	134470563	0.154847	8.8095e-06	308	Genus_Propionibacterium_Retroauricularfold_Sebaceous_KORAFF4 || id:GCST90133201-2	2	TRUE	0.0622319	20.3067
rs211830	A	G	A	G	0.392817	-0.11832	0.498423	0.546959	FALSE	FALSE	FALSE	20	39851808	0.0723559	397953	0.101995	Guttate psoriasis || id:finngen_R10_L12_PSORI_GUTTATE	20	38480450	0.078895	1.05476e-06	317	Genus_Propionibacterium_Retroauricularfold_Sebaceous_KORAFF4 || id:GCST90133201-2	2	TRUE	0.0725306	24.6338
rs2277868	T	C	T	C	0.39607	-0.0162615	0.735016	0.746037	FALSE	FALSE	FALSE	20	17699899	0.0827799	397953	0.844264	Guttate psoriasis || id:finngen_R10_L12_PSORI_GUTTATE	20	17680544	0.0837485	3.40501e-06	317	Genus_Propionibacterium_Retroauricularfold_Sebaceous_KORAFF4 || id:GCST90133201-2	2	TRUE	0.0659054	22.2249
rs2698569	C	T	C	T	0.793764	0.152729	0.935127	0.92759	FALSE	FALSE	FALSE	11	18437833	0.139154	397953	0.272399	Guttate psoriasis || id:finngen_R10_L12_PSORI_GUTTATE	11	18459380	0.153544	4.18332e-07	316	Genus_Propionibacterium_Retroauricularfold_Sebaceous_KORAFF4 || id:GCST90133201-2	2	TRUE	0.077978	26.5559
rs36117378	C	G	C	G	0.603202	0.0751001	0.876271	0.917433	FALSE	TRUE	FALSE	8	72344361	0.132523	397953	0.570922	Guttate psoriasis || id:finngen_R10_L12_PSORI_GUTTATE	8	73256596	0.11835	6.20567e-07	295	Genus_Propionibacterium_Retroauricularfold_Sebaceous_KORAFF4 || id:GCST90133201-2	2	TRUE	0.0809314	25.801
rs73370168	A	G	A	G	0.777925	0.0109319	0.940895	0.945672	FALSE	FALSE	FALSE	10	122100324	0.158475	397953	0.945004	Guttate psoriasis || id:finngen_R10_L12_PSORI_GUTTATE	10	123859839	0.16504	3.67834e-06	313	Genus_Propionibacterium_Retroauricularfold_Sebaceous_KORAFF4 || id:GCST90133201-2	2	TRUE	0.066278	22.0756
rs75590953	C	T	C	T	0.458714	-0.00280677	0.823052	0.83895	FALSE	FALSE	FALSE	16	79876212	0.0981672	397953	0.97719	Guttate psoriasis || id:finngen_R10_L12_PSORI_GUTTATE	16	79910109	0.101095	8.18914e-06	308	Genus_Propionibacterium_Retroauricularfold_Sebaceous_KORAFF4 || id:GCST90133201-2	2	TRUE	0.0626577	20.4549
rs75666428	A	G	A	G	0.798376	-0.108895	0.9375	0.952587	FALSE	FALSE	FALSE	15	84012650	0.171302	397953	0.52498	Guttate psoriasis || id:finngen_R10_L12_PSORI_GUTTATE	15	84681402	0.153076	3.35742e-07	312	Genus_Propionibacterium_Retroauricularfold_Sebaceous_KORAFF4 || id:GCST90133201-2	2	TRUE	0.0801942	27.0277
rs7656419	G	T	G	T	0.521765	0.213229	0.8367	0.884094	FALSE	FALSE	FALSE	4	189777963	0.112232	397953	0.0574474	Guttate psoriasis || id:finngen_R10_L12_PSORI_GUTTATE	4	190699117	0.109772	3.13426e-06	297	Genus_Propionibacterium_Retroauricularfold_Sebaceous_KORAFF4 || id:GCST90133201-2	2	TRUE	0.0706917	22.4404
rs79565510	A	T	A	T	0.892609	0.195893	0.94127	0.978279	FALSE	TRUE	FALSE	12	67985845	0.24545	397953	0.424814	Guttate psoriasis || id:finngen_R10_L12_PSORI_GUTTATE	12	68379625	0.157842	3.51287e-08	315	Genus_Propionibacterium_Retroauricularfold_Sebaceous_KORAFF4 || id:GCST90133201-2	2	TRUE	0.0921664	31.7768
rs8039423	G	A	G	A	0.402059	-0.0570029	0.749191	0.820929	FALSE	FALSE	FALSE	15	54158175	0.0943214	397953	0.545613	Guttate psoriasis || id:finngen_R10_L12_PSORI_GUTTATE	15	54450372	0.0885389	8.05095e-06	309	Genus_Propionibacterium_Retroauricularfold_Sebaceous_KORAFF4 || id:GCST90133201-2	2	TRUE	0.0625599	20.4876
rs1417689	T	C	T	C	-0.429214	-0.00420893	0.696429	0.58528	FALSE	FALSE	FALSE	6	63126735	0.0731102	397953	0.954091	Guttate psoriasis || id:finngen_R10_L12_PSORI_GUTTATE	6	63836640	0.0934016	6.85792e-06	252	Genus_Corynebacterium_Forehead_Sebaceous_PopGen || id:GCST90133202-1	2	TRUE	0.0773196	20.9497
rs1521825	A	G	A	G	-0.431833	-0.0218044	0.613095	0.67563	FALSE	FALSE	FALSE	8	83172197	0.0769901	397953	0.777016	Guttate psoriasis || id:finngen_R10_L12_PSORI_GUTTATE	8	84084432	0.0924111	4.8556e-06	252	Genus_Corynebacterium_Forehead_Sebaceous_PopGen || id:GCST90133202-1	2	TRUE	0.0797428	21.6632
rs7244378	G	A	G	A	0.571015	0.0532926	0.80754	0.822516	FALSE	FALSE	FALSE	18	63435607	0.0943381	397953	0.572134	Guttate psoriasis || id:finngen_R10_L12_PSORI_GUTTATE	18	61102840	0.109377	3.75178e-07	252	Genus_Corynebacterium_Forehead_Sebaceous_PopGen || id:GCST90133202-1	2	TRUE	0.0975991	27.0387
rs75742406	G	A	G	A	0.491584	0.0395692	0.765873	0.722301	FALSE	FALSE	FALSE	11	17048818	0.0802898	397953	0.622133	Guttate psoriasis || id:finngen_R10_L12_PSORI_GUTTATE	11	17070365	0.10171	2.34712e-06	252	Genus_Corynebacterium_Forehead_Sebaceous_PopGen || id:GCST90133202-1	2	TRUE	0.0848335	23.1743
rs78998127	T	A	T	A	0.675704	-0.0687949	0.906746	0.941567	FALSE	TRUE	FALSE	3	101611289	0.152802	397953	0.65255	Guttate psoriasis || id:finngen_R10_L12_PSORI_GUTTATE	3	101330133	0.14813	7.95983e-06	252	Genus_Corynebacterium_Forehead_Sebaceous_PopGen || id:GCST90133202-1	2	TRUE	0.0762729	20.6427
rs9887771	C	G	C	G	-0.469644	0.0108767	0.775794	0.717163	FALSE	TRUE	FALSE	1	99811188	0.080185	397953	0.892102	Guttate psoriasis || id:finngen_R10_L12_PSORI_GUTTATE	1	100276744	0.103663	9.12111e-06	252	Genus_Corynebacterium_Forehead_Sebaceous_PopGen || id:GCST90133202-1	2	TRUE	0.0753158	20.3626
rs13050263	G	C	G	C	-0.464315	-0.110867	0.743464	0.788976	FALSE	TRUE	FALSE	21	21292983	0.0885148	397953	0.210377	Guttate psoriasis || id:finngen_R10_L12_PSORI_GUTTATE	21	22665303	0.0873719	2.07572e-07	306	Genus_Corynebacterium_Retroauricularfold_Sebaceous_KORAFF4 || id:GCST90133202-2	2	TRUE	0.0844933	28.0566
rs16960676	C	T	C	T	-0.655785	-0.188103	0.91806	0.934931	FALSE	FALSE	FALSE	16	12786589	0.146323	397953	0.198605	Guttate psoriasis || id:finngen_R10_L12_PSORI_GUTTATE	16	12880446	0.143977	7.66352e-06	299	Genus_Corynebacterium_Retroauricularfold_Sebaceous_KORAFF4 || id:GCST90133202-2	2	TRUE	0.064883	20.6073
rs28807761	G	A	G	A	-0.704745	-0.111297	0.92691	0.933215	FALSE	FALSE	FALSE	15	27396116	0.14338	397953	0.437611	Guttate psoriasis || id:finngen_R10_L12_PSORI_GUTTATE	15	27641262	0.148021	3.00445e-06	301	Genus_Corynebacterium_Retroauricularfold_Sebaceous_KORAFF4 || id:GCST90133202-2	2	TRUE	0.0700352	22.5176
rs11235232	A	G	A	G	0.658933	0.00972567	0.793919	0.814693	FALSE	FALSE	FALSE	11	87615970	0.0933088	397953	0.916986	Guttate psoriasis || id:finngen_R10_L12_PSORI_GUTTATE	11	87326862	0.1408	6.49034e-06	148	Genus_Haemophilus_Dorsalforearm_Dry_PopGen || id:GCST90133219-1	2	TRUE	0.128909	21.6058
rs112384482	C	G	C	G	1.06141	0.0332045	0.929054	0.890374	FALSE	TRUE	FALSE	2	24008950	0.114574	397953	0.771964	Guttate psoriasis || id:finngen_R10_L12_PSORI_GUTTATE	2	24231820	0.218566	3.0456e-06	148	Genus_Haemophilus_Dorsalforearm_Dry_PopGen || id:GCST90133219-1	2	TRUE	0.137444	23.2643
rs149893292	G	A	G	A	-0.881281	-0.129774	0.908784	0.859787	FALSE	FALSE	FALSE	4	186248205	0.104195	397953	0.212952	Guttate psoriasis || id:finngen_R10_L12_PSORI_GUTTATE	4	187169359	0.1903	7.98076e-06	148	Genus_Haemophilus_Dorsalforearm_Dry_PopGen || id:GCST90133219-1	2	TRUE	0.126566	21.1564
rs17562195	T	C	T	C	-1.41257	0.180003	0.959459	0.924732	FALSE	FALSE	FALSE	1	197459299	0.135671	397953	0.184587	Guttate psoriasis || id:finngen_R10_L12_PSORI_GUTTATE	1	197428429	0.277507	1.08496e-06	148	Genus_Haemophilus_Dorsalforearm_Dry_PopGen || id:GCST90133219-1	2	TRUE	0.148987	25.5603
rs2268390	C	T	C	T	0.642972	-0.0869852	0.780405	0.771845	FALSE	FALSE	FALSE	12	109197472	0.085492	397953	0.308932	Guttate psoriasis || id:finngen_R10_L12_PSORI_GUTTATE	12	109635277	0.130334	2.17566e-06	148	Genus_Haemophilus_Dorsalforearm_Dry_PopGen || id:GCST90133219-1	2	TRUE	0.141218	24.0083
rs4705804	C	T	C	T	-0.57201	0.0373215	0.72973	0.698731	FALSE	FALSE	FALSE	5	113223073	0.0784031	397953	0.634059	Guttate psoriasis || id:finngen_R10_L12_PSORI_GUTTATE	5	112558770	0.124001	8.6098e-06	148	Genus_Haemophilus_Dorsalforearm_Dry_PopGen || id:GCST90133219-1	2	TRUE	0.125706	20.9918
rs6456465	A	G	A	G	0.831478	0.00293911	0.875	0.85081	FALSE	FALSE	FALSE	6	22026688	0.101642	397953	0.976931	Guttate psoriasis || id:finngen_R10_L12_PSORI_GUTTATE	6	22026917	0.176909	5.95987e-06	148	Genus_Haemophilus_Dorsalforearm_Dry_PopGen || id:GCST90133219-1	2	TRUE	0.129873	21.7917
rs6765913	A	G	A	G	-0.637569	0.0660992	0.831081	0.847541	FALSE	FALSE	FALSE	3	194473367	0.100463	397953	0.510574	Guttate psoriasis || id:finngen_R10_L12_PSORI_GUTTATE	3	194194096	0.139221	9.903e-06	148	Genus_Haemophilus_Dorsalforearm_Dry_PopGen || id:GCST90133219-1	2	TRUE	0.124117	20.6889
rs7751	T	C	T	C	0.558338	0.129364	0.658784	0.711901	FALSE	FALSE	FALSE	22	17628665	0.0797509	397953	0.104781	Guttate psoriasis || id:finngen_R10_L12_PSORI_GUTTATE	22	18111431	0.120454	7.83786e-06	148	Genus_Haemophilus_Dorsalforearm_Dry_PopGen || id:GCST90133219-1	2	TRUE	0.126771	21.1956
rs10423922	T	A	T	A	-0.93297	0.0615435	0.915493	0.92592	FALSE	TRUE	FALSE	19	52500286	0.136863	397953	0.652946	Guttate psoriasis || id:finngen_R10_L12_PSORI_GUTTATE	19	53003539	0.198939	6.42897e-06	142	Genus_Haemophilus_Volarforearm_Dry_PopGen || id:GCST90133219-2	2	TRUE	0.134112	21.6838
rs10484051	C	A	C	A	1.12672	-0.236018	0.933099	0.893892	FALSE	FALSE	FALSE	14	95502745	0.117487	397953	0.0445482	Guttate psoriasis || id:finngen_R10_L12_PSORI_GUTTATE	14	95969082	0.228015	2.18143e-06	142	Genus_Haemophilus_Volarforearm_Dry_PopGen || id:GCST90133219-2	2	TRUE	0.146725	24.0737
rs11209635	T	G	T	G	-1.00371	0.0109674	0.901408	0.905695	FALSE	FALSE	FALSE	1	70548777	0.12339	397953	0.929174	Guttate psoriasis || id:finngen_R10_L12_PSORI_GUTTATE	1	71014460	0.183999	2.15748e-07	142	Genus_Haemophilus_Volarforearm_Dry_PopGen || id:GCST90133219-2	2	TRUE	0.173249	29.3375
rs1123295	A	G	A	G	-0.504469	0.0252543	0.552817	0.561966	FALSE	FALSE	FALSE	1	33444852	0.0725591	397953	0.727802	Guttate psoriasis || id:finngen_R10_L12_PSORI_GUTTATE	1	33910453	0.108949	8.25323e-06	142	Genus_Haemophilus_Volarforearm_Dry_PopGen || id:GCST90133219-2	2	TRUE	0.131178	21.1378
rs11611443	C	A	C	A	-0.987741	-0.0369884	0.919014	0.93963	FALSE	FALSE	FALSE	12	1501858	0.150721	397953	0.80614	Guttate psoriasis || id:finngen_R10_L12_PSORI_GUTTATE	12	1611024	0.212524	7.67441e-06	142	Genus_Haemophilus_Volarforearm_Dry_PopGen || id:GCST90133219-2	2	TRUE	0.132033	21.2965
rs11894899	G	T	G	T	-0.797766	-0.0681781	0.883803	0.845791	FALSE	FALSE	FALSE	2	1017608	0.0991857	397953	0.491844	Guttate psoriasis || id:finngen_R10_L12_PSORI_GUTTATE	2	1013294	0.160009	1.79655e-06	142	Genus_Haemophilus_Volarforearm_Dry_PopGen || id:GCST90133219-2	2	TRUE	0.148975	24.5076
rs1204632	T	G	T	G	0.895515	-0.103433	0.887324	0.922113	FALSE	FALSE	FALSE	20	22421780	0.133298	397953	0.437775	Guttate psoriasis || id:finngen_R10_L12_PSORI_GUTTATE	20	22402418	0.186574	4.02585e-06	142	Genus_Haemophilus_Volarforearm_Dry_PopGen || id:GCST90133219-2	2	TRUE	0.139591	22.7133
rs12143770	T	C	T	C	0.531059	0.101567	0.637324	0.615848	FALSE	FALSE	FALSE	1	18397443	0.0738104	397953	0.168803	Guttate psoriasis || id:finngen_R10_L12_PSORI_GUTTATE	1	18723937	0.114651	8.1963e-06	142	Genus_Haemophilus_Volarforearm_Dry_PopGen || id:GCST90133219-2	2	TRUE	0.13126	21.1529
rs1917949	T	C	T	C	-0.614193	0.0123358	0.75	0.788818	FALSE	FALSE	FALSE	2	234640696	0.0880223	397953	0.888546	Guttate psoriasis || id:finngen_R10_L12_PSORI_GUTTATE	2	235549340	0.132689	8.30488e-06	142	Genus_Haemophilus_Volarforearm_Dry_PopGen || id:GCST90133219-2	2	TRUE	0.131105	21.1242
rs202559	G	A	G	A	0.660291	0.0857452	0.799296	0.766458	FALSE	FALSE	FALSE	20	1781638	0.0855769	397953	0.31636	Guttate psoriasis || id:finngen_R10_L12_PSORI_GUTTATE	20	1762284	0.144027	9.99201e-06	142	Genus_Haemophilus_Volarforearm_Dry_PopGen || id:GCST90133219-2	2	TRUE	0.128928	20.7215
rs2076075	G	A	G	A	0.748718	0.132622	0.862676	0.880172	FALSE	FALSE	FALSE	1	186854152	0.110627	397953	0.230599	Guttate psoriasis || id:finngen_R10_L12_PSORI_GUTTATE	1	186823284	0.159068	5.97884e-06	142	Genus_Haemophilus_Volarforearm_Dry_PopGen || id:GCST90133219-2	2	TRUE	0.134964	21.8429
rs2496546	C	A	C	A	0.517021	-0.0350772	0.619718	0.632233	FALSE	FALSE	FALSE	6	72124065	0.0746572	397953	0.638466	Guttate psoriasis || id:finngen_R10_L12_PSORI_GUTTATE	6	72833768	0.111692	8.29957e-06	142	Genus_Haemophilus_Volarforearm_Dry_PopGen || id:GCST90133219-2	2	TRUE	0.131113	21.1256
rs4072355	G	C	G	C	-0.793808	-0.0393334	0.820423	0.780956	FALSE	TRUE	FALSE	8	12737789	0.0876376	397953	0.653562	Guttate psoriasis || id:finngen_R10_L12_PSORI_GUTTATE	8	12595298	0.146549	2.57588e-07	142	Genus_Haemophilus_Volarforearm_Dry_PopGen || id:GCST90133219-2	2	TRUE	0.17124	28.9271
rs4836877	A	C	A	C	-0.745611	-0.0423283	0.823944	0.851698	FALSE	FALSE	FALSE	9	116843886	0.1013	397953	0.676055	Guttate psoriasis || id:finngen_R10_L12_PSORI_GUTTATE	9	119606165	0.149003	1.65808e-06	142	Genus_Haemophilus_Volarforearm_Dry_PopGen || id:GCST90133219-2	2	TRUE	0.149904	24.6873
rs61882555	T	G	T	G	-0.668978	0.0269174	0.785211	0.796168	FALSE	FALSE	FALSE	11	79408195	0.0893465	397953	0.763208	Guttate psoriasis || id:finngen_R10_L12_PSORI_GUTTATE	11	79119239	0.138694	3.63755e-06	142	Genus_Haemophilus_Volarforearm_Dry_PopGen || id:GCST90133219-2	2	TRUE	0.140775	22.9375
rs7984030	T	C	T	C	-0.924438	0.153497	0.911972	0.904629	FALSE	FALSE	FALSE	13	44056284	0.121849	397953	0.207766	Guttate psoriasis || id:finngen_R10_L12_PSORI_GUTTATE	13	44630420	0.186407	2.0178e-06	142	Genus_Haemophilus_Volarforearm_Dry_PopGen || id:GCST90133219-2	2	TRUE	0.147629	24.2478
rs111289765	C	T	C	T	0.408139	0.0779846	0.662162	0.668495	FALSE	FALSE	FALSE	2	20402874	0.0766971	397953	0.309255	Guttate psoriasis || id:finngen_R10_L12_PSORI_GUTTATE	2	20602635	0.0849177	2.61815e-06	259	Genus_Staphylococcus_Dorsalforearm_Dry_PopGen || id:GCST90133223-1	2	TRUE	0.0818872	22.922
rs11206972	G	A	G	A	0.578449	-0.0192225	0.841699	0.777823	FALSE	FALSE	FALSE	1	57100826	0.0868207	397953	0.824777	Guttate psoriasis || id:finngen_R10_L12_PSORI_GUTTATE	1	57566499	0.118411	1.82007e-06	259	Genus_Staphylococcus_Dorsalforearm_Dry_PopGen || id:GCST90133223-1	2	TRUE	0.0843657	23.6798
rs12206344	C	G	C	G	0.75434	-0.321705	0.920849	0.909399	FALSE	TRUE	FALSE	6	22245576	0.125921	397953	0.0106248	Guttate psoriasis || id:finngen_R10_L12_PSORI_GUTTATE	6	22245805	0.159695	3.81533e-06	259	Genus_Staphylococcus_Dorsalforearm_Dry_PopGen || id:GCST90133223-1	2	TRUE	0.0793164	22.1404
rs12270027	G	A	G	A	0.477759	0.0300781	0.754826	0.822058	FALSE	FALSE	FALSE	11	129693528	0.0947792	397953	0.750979	Guttate psoriasis || id:finngen_R10_L12_PSORI_GUTTATE	11	129563423	0.105144	8.50568e-06	259	Genus_Staphylococcus_Dorsalforearm_Dry_PopGen || id:GCST90133223-1	2	TRUE	0.0738306	20.487
rs12572683	A	G	A	G	-0.450042	-0.0754647	0.754826	0.690481	FALSE	FALSE	FALSE	10	7610458	0.0782042	397953	0.33456	Guttate psoriasis || id:finngen_R10_L12_PSORI_GUTTATE	10	7652421	0.0972715	5.89688e-06	259	Genus_Staphylococcus_Dorsalforearm_Dry_PopGen || id:GCST90133223-1	2	TRUE	0.0763391	21.2406
rs34323080	C	T	C	T	0.402286	0.0166115	0.683398	0.634719	FALSE	FALSE	FALSE	4	61844375	0.0746194	397953	0.823834	Guttate psoriasis || id:finngen_R10_L12_PSORI_GUTTATE	4	62710093	0.089077	9.60258e-06	259	Genus_Staphylococcus_Dorsalforearm_Dry_PopGen || id:GCST90133223-1	2	TRUE	0.0729993	20.2382
rs35541683	A	G	A	G	0.709757	-0.123341	0.916988	0.930966	FALSE	FALSE	FALSE	18	51667348	0.141713	397953	0.384107	Guttate psoriasis || id:finngen_R10_L12_PSORI_GUTTATE	18	49193718	0.157376	9.86679e-06	259	Genus_Staphylococcus_Dorsalforearm_Dry_PopGen || id:GCST90133223-1	2	TRUE	0.0728132	20.1825
rs66498356	G	C	G	C	0.444924	0.0386294	0.675676	0.695971	FALSE	TRUE	FALSE	4	75935911	0.0783171	397953	0.62184	Guttate psoriasis || id:finngen_R10_L12_PSORI_GUTTATE	4	76857064	0.0941521	3.78165e-06	259	Genus_Staphylococcus_Dorsalforearm_Dry_PopGen || id:GCST90133223-1	2	TRUE	0.0793769	22.1588
rs72695710	T	C	T	C	0.83742	-0.0189669	0.940154	0.888371	FALSE	FALSE	FALSE	4	165906118	0.114938	397953	0.868929	Guttate psoriasis || id:finngen_R10_L12_PSORI_GUTTATE	4	166827270	0.172081	1.98451e-06	259	Genus_Staphylococcus_Dorsalforearm_Dry_PopGen || id:GCST90133223-1	2	TRUE	0.0837765	23.4992
rs9592538	T	G	T	G	0.425857	0.000298926	0.557915	0.536834	FALSE	FALSE	FALSE	13	67940392	0.0723569	397953	0.996704	Guttate psoriasis || id:finngen_R10_L12_PSORI_GUTTATE	13	68514524	0.0812362	3.31292e-07	259	Genus_Staphylococcus_Dorsalforearm_Dry_PopGen || id:GCST90133223-1	2	TRUE	0.0959251	27.2685
rs1539567	G	A	G	A	0.514454	-0.0674602	0.793173	0.873696	FALSE	FALSE	FALSE	9	127479887	0.107666	397953	0.530942	Guttate psoriasis || id:finngen_R10_L12_PSORI_GUTTATE	9	130242166	0.110171	4.95738e-06	249	Genus_Staphylococcus_Volarforearm_Dry_PopGen || id:GCST90133223-2	2	TRUE	0.0805191	21.6298
rs1885482	T	A	T	A	0.596615	-0.10235	0.831325	0.791864	FALSE	TRUE	FALSE	14	70013498	0.0883256	397953	0.246547	Guttate psoriasis || id:finngen_R10_L12_PSORI_GUTTATE	14	70480215	0.12004	1.25158e-06	249	Genus_Staphylococcus_Volarforearm_Dry_PopGen || id:GCST90133223-2	2	TRUE	0.0902516	24.5036
rs2560691	G	A	G	A	-0.523757	-0.0133932	0.716867	0.759554	FALSE	FALSE	FALSE	5	116018886	0.0841675	397953	0.87357	Guttate psoriasis || id:finngen_R10_L12_PSORI_GUTTATE	5	115354583	0.0974374	1.76891e-07	249	Genus_Staphylococcus_Volarforearm_Dry_PopGen || id:GCST90133223-2	2	TRUE	0.103975	28.6619
rs2832084	A	G	A	G	0.518166	-0.136876	0.797189	0.784415	FALSE	FALSE	FALSE	21	28782476	0.0875182	397953	0.117825	Guttate psoriasis || id:finngen_R10_L12_PSORI_GUTTATE	21	30154798	0.113675	8.11652e-06	249	Genus_Staphylococcus_Volarforearm_Dry_PopGen || id:GCST90133223-2	2	TRUE	0.0770193	20.6112
rs2856330	T	C	T	C	0.653799	-0.12769	0.889558	0.884608	FALSE	FALSE	FALSE	12	11789843	0.116639	397953	0.273626	Guttate psoriasis || id:finngen_R10_L12_PSORI_GUTTATE	12	11942777	0.14074	5.52142e-06	249	Genus_Staphylococcus_Volarforearm_Dry_PopGen || id:GCST90133223-2	2	TRUE	0.0797547	21.4067
rs11579228	C	T	C	T	-0.514029	-0.0122744	0.820463	0.840704	FALSE	FALSE	FALSE	1	211378536	0.0979839	397953	0.90031	Guttate psoriasis || id:finngen_R10_L12_PSORI_GUTTATE	1	211551878	0.112661	7.83167e-06	259	Genus_Corynebacterium_Dorsalforearm_Dry_PopGen || id:GCST90133224-1	2	TRUE	0.0743963	20.6566
rs1234358	C	T	C	T	-0.41987	-0.0685095	0.664093	0.770221	FALSE	FALSE	FALSE	7	150683943	0.0856306	397953	0.423677	Guttate psoriasis || id:finngen_R10_L12_PSORI_GUTTATE	7	150381031	0.0899336	4.88744e-06	259	Genus_Corynebacterium_Dorsalforearm_Dry_PopGen || id:GCST90133224-1	2	TRUE	0.0776236	21.6281
rs12436788	G	A	G	A	-0.635006	0.0506498	0.889961	0.884144	FALSE	FALSE	FALSE	14	48309571	0.112595	397953	0.652825	Guttate psoriasis || id:finngen_R10_L12_PSORI_GUTTATE	14	48778774	0.130295	1.9197e-06	259	Genus_Corynebacterium_Dorsalforearm_Dry_PopGen || id:GCST90133224-1	2	TRUE	0.0840027	23.5685
rs13362349	A	G	A	G	-0.514554	0.0783743	0.77027	0.674884	FALSE	FALSE	FALSE	5	71737765	0.077929	397953	0.314553	Guttate psoriasis || id:finngen_R10_L12_PSORI_GUTTATE	5	71033592	0.106007	2.10214e-06	259	Genus_Corynebacterium_Dorsalforearm_Dry_PopGen || id:GCST90133224-1	2	TRUE	0.083384	23.3791
rs149821435	G	A	G	A	-0.564657	0.0111368	0.837838	0.846824	FALSE	FALSE	FALSE	8	102511288	0.100696	397953	0.911934	Guttate psoriasis || id:finngen_R10_L12_PSORI_GUTTATE	8	103523516	0.115964	1.95897e-06	259	Genus_Corynebacterium_Dorsalforearm_Dry_PopGen || id:GCST90133224-1	2	TRUE	0.0838647	23.5263
rs17375837	A	G	A	G	-0.874612	0.033983	0.942085	0.955237	FALSE	FALSE	FALSE	3	123946165	0.173829	397953	0.845004	Guttate psoriasis || id:finngen_R10_L12_PSORI_GUTTATE	3	123665012	0.187344	4.89161e-06	259	Genus_Corynebacterium_Dorsalforearm_Dry_PopGen || id:GCST90133224-1	2	TRUE	0.0776178	21.6264
rs17617684	G	T	G	T	-0.415187	-0.000278317	0.604247	0.5895	FALSE	FALSE	FALSE	17	14230033	0.0729805	397953	0.996957	Guttate psoriasis || id:finngen_R10_L12_PSORI_GUTTATE	17	14133350	0.0893321	5.36888e-06	259	Genus_Corynebacterium_Dorsalforearm_Dry_PopGen || id:GCST90133224-1	2	TRUE	0.076981	21.4341
rs6774189	A	G	A	G	0.767721	-0.180568	0.928571	0.937831	FALSE	FALSE	FALSE	3	46551040	0.149106	397953	0.225894	Guttate psoriasis || id:finngen_R10_L12_PSORI_GUTTATE	3	46592530	0.161197	3.19639e-06	259	Genus_Corynebacterium_Dorsalforearm_Dry_PopGen || id:GCST90133224-1	2	TRUE	0.0805253	22.5074
rs7028802	C	T	C	T	0.630452	0.198345	0.888031	0.920578	FALSE	FALSE	FALSE	9	390228	0.133605	397953	0.137658	Guttate psoriasis || id:finngen_R10_L12_PSORI_GUTTATE	9	390228	0.135098	4.932e-06	259	Genus_Corynebacterium_Dorsalforearm_Dry_PopGen || id:GCST90133224-1	2	TRUE	0.0775615	21.6094
rs72826444	C	T	C	T	0.83598	-0.0343754	0.938224	0.923739	FALSE	FALSE	FALSE	17	51123012	0.136805	397953	0.801603	Guttate psoriasis || id:finngen_R10_L12_PSORI_GUTTATE	17	49200373	0.182455	7.19424e-06	259	Genus_Corynebacterium_Dorsalforearm_Dry_PopGen || id:GCST90133224-1	2	TRUE	0.0749777	20.8312
rs1100150	A	G	A	G	0.649269	0.0130983	0.888	0.843712	FALSE	FALSE	FALSE	7	12398078	0.0993019	397953	0.895061	Guttate psoriasis || id:finngen_R10_L12_PSORI_GUTTATE	7	12437704	0.139833	5.56727e-06	250	Genus_Corynebacterium_Volarforearm_Dry_PopGen || id:GCST90133224-2	2	TRUE	0.0793895	21.3864
rs11059855	C	T	C	T	-0.420798	0.00242078	0.694	0.732386	FALSE	FALSE	FALSE	12	128725565	0.0814451	397953	0.976288	Guttate psoriasis || id:finngen_R10_L12_PSORI_GUTTATE	12	129210110	0.0931672	9.72498e-06	250	Genus_Corynebacterium_Volarforearm_Dry_PopGen || id:GCST90133224-2	2	TRUE	0.0754423	20.2364
rs12873717	G	A	G	A	0.511774	0.00164916	0.76	0.713553	FALSE	FALSE	FALSE	13	110569482	0.0795947	397953	0.983469	Guttate psoriasis || id:finngen_R10_L12_PSORI_GUTTATE	13	111221829	0.104374	1.70575e-06	250	Genus_Corynebacterium_Volarforearm_Dry_PopGen || id:GCST90133224-2	2	TRUE	0.0877306	23.8495
rs340202	A	C	A	C	0.505236	-0.0886381	0.72	0.676237	FALSE	FALSE	FALSE	4	85432643	0.0772457	397953	0.251182	Guttate psoriasis || id:finngen_R10_L12_PSORI_GUTTATE	4	86353796	0.102393	1.4764e-06	250	Genus_Corynebacterium_Volarforearm_Dry_PopGen || id:GCST90133224-2	2	TRUE	0.0887457	24.1524
rs3847320	G	A	G	A	0.448337	0.0749957	0.73	0.6906	FALSE	FALSE	FALSE	9	134041630	0.0782092	397953	0.337604	Guttate psoriasis || id:finngen_R10_L12_PSORI_GUTTATE	9	136906752	0.0962566	5.2172e-06	250	Genus_Corynebacterium_Volarforearm_Dry_PopGen || id:GCST90133224-2	2	TRUE	0.0798485	21.5208
rs57778164	T	C	T	C	-0.507266	-0.0834917	0.732	0.723257	FALSE	FALSE	FALSE	16	56643722	0.0803123	397953	0.298531	Guttate psoriasis || id:finngen_R10_L12_PSORI_GUTTATE	16	56677634	0.0972078	3.81465e-07	250	Genus_Corynebacterium_Volarforearm_Dry_PopGen || id:GCST90133224-2	2	TRUE	0.0982262	27.0135
rs6731937	T	C	T	C	-0.389835	0.0680848	0.574	0.550681	FALSE	FALSE	FALSE	2	120426644	0.0721073	397953	0.34506	Guttate psoriasis || id:finngen_R10_L12_PSORI_GUTTATE	2	121184220	0.0847002	6.66759e-06	250	Genus_Corynebacterium_Volarforearm_Dry_PopGen || id:GCST90133224-2	2	TRUE	0.0781141	21.0138
rs7238445	G	A	G	A	0.504547	-0.0910149	0.794	0.738147	FALSE	FALSE	FALSE	18	52255174	0.0818574	397953	0.266194	Guttate psoriasis || id:finngen_R10_L12_PSORI_GUTTATE	18	49781544	0.110212	7.43129e-06	250	Genus_Corynebacterium_Volarforearm_Dry_PopGen || id:GCST90133224-2	2	TRUE	0.0773469	20.7901
rs73227985	G	A	G	A	-0.696605	0.0724982	0.9	0.85366	FALSE	FALSE	FALSE	13	75818397	0.102489	397953	0.479335	Guttate psoriasis || id:finngen_R10_L12_PSORI_GUTTATE	13	76392533	0.152506	7.77409e-06	250	Genus_Corynebacterium_Volarforearm_Dry_PopGen || id:GCST90133224-2	2	TRUE	0.0770277	20.6971
rs8076452	C	T	C	T	-0.540331	-0.11775	0.832	0.83189	FALSE	FALSE	FALSE	17	17596340	0.0965639	397953	0.222692	Guttate psoriasis || id:finngen_R10_L12_PSORI_GUTTATE	17	17499654	0.118981	8.72875e-06	250	Genus_Corynebacterium_Volarforearm_Dry_PopGen || id:GCST90133224-2	2	TRUE	0.0762077	20.4586
rs876400	C	T	C	T	-0.501821	-0.11072	0.682	0.740497	FALSE	FALSE	FALSE	9	78219983	0.0823305	397953	0.178682	Guttate psoriasis || id:finngen_R10_L12_PSORI_GUTTATE	9	80834899	0.0912914	9.58792e-08	250	Genus_Corynebacterium_Volarforearm_Dry_PopGen || id:GCST90133224-2	2	TRUE	0.107831	29.9743
rs10846578	C	T	C	T	0.522194	0.0693554	0.666667	0.654106	FALSE	FALSE	FALSE	12	123915731	0.0762495	397953	0.363041	Guttate psoriasis || id:finngen_R10_L12_PSORI_GUTTATE	12	124400278	0.111864	6.23645e-06	168	Genus_Bacteroides_Dorsalforearm_Dry_PopGen || id:GCST90133229-1	2	TRUE	0.114818	21.5321
rs112990712	T	C	T	C	-0.816386	0.00240793	0.907738	0.888456	FALSE	FALSE	FALSE	1	163089055	0.114092	397953	0.983162	Guttate psoriasis || id:finngen_R10_L12_PSORI_GUTTATE	1	163058845	0.171774	4.32578e-06	168	Genus_Bacteroides_Dorsalforearm_Dry_PopGen || id:GCST90133229-1	2	TRUE	0.118518	22.3191
rs1891661	A	G	A	G	0.541614	-0.0179171	0.633929	0.62984	FALSE	FALSE	FALSE	1	210812668	0.0747213	397953	0.810496	Guttate psoriasis || id:finngen_R10_L12_PSORI_GUTTATE	1	210986010	0.10985	1.97543e-06	168	Genus_Bacteroides_Dorsalforearm_Dry_PopGen || id:GCST90133229-1	2	TRUE	0.126408	24.0201
rs34885890	G	A	G	A	-0.974744	0.128844	0.925595	0.910403	FALSE	FALSE	FALSE	4	2387668	0.125466	397953	0.304455	Guttate psoriasis || id:finngen_R10_L12_PSORI_GUTTATE	4	2389395	0.190885	8.92166e-07	168	Genus_Bacteroides_Dorsalforearm_Dry_PopGen || id:GCST90133229-1	2	TRUE	0.134359	25.7654
rs4492732	A	G	A	G	-1.08325	0.0100664	0.943452	0.939986	FALSE	FALSE	FALSE	10	120613346	0.15019	397953	0.946562	Guttate psoriasis || id:finngen_R10_L12_PSORI_GUTTATE	10	122372858	0.226221	3.7001e-06	168	Genus_Bacteroides_Dorsalforearm_Dry_PopGen || id:GCST90133229-1	2	TRUE	0.120094	22.6566
rs55702239	G	A	G	A	-0.599683	0.110414	0.75	0.736897	FALSE	FALSE	FALSE	4	54191582	0.081984	397953	0.178052	Guttate psoriasis || id:finngen_R10_L12_PSORI_GUTTATE	4	55057749	0.103672	3.53155e-08	168	Genus_Bacteroides_Dorsalforearm_Dry_PopGen || id:GCST90133229-1	2	TRUE	0.166085	33.061
rs567637	A	G	A	G	-0.50942	0.0482857	0.598214	0.570298	FALSE	FALSE	FALSE	16	84500760	0.0727305	397953	0.506755	Guttate psoriasis || id:finngen_R10_L12_PSORI_GUTTATE	16	84534366	0.10774	4.81074e-06	168	Genus_Bacteroides_Dorsalforearm_Dry_PopGen || id:GCST90133229-1	2	TRUE	0.117444	22.0901
rs62043393	G	T	G	T	-1.02423	-0.499354	0.940476	0.976264	FALSE	FALSE	FALSE	16	87004603	0.233886	397953	0.0327582	Guttate psoriasis || id:finngen_R10_L12_PSORI_GUTTATE	16	87038209	0.222231	8.03886e-06	168	Genus_Bacteroides_Dorsalforearm_Dry_PopGen || id:GCST90133229-1	2	TRUE	0.112244	20.9884
rs6951622	C	G	C	G	-0.55053	-0.198161	0.723214	0.676048	FALSE	TRUE	FALSE	7	148429882	0.0735625	397953	0.00706464	Guttate psoriasis || id:finngen_R10_L12_PSORI_GUTTATE	7	148126974	0.116732	5.06879e-06	168	Genus_Bacteroides_Dorsalforearm_Dry_PopGen || id:GCST90133229-1	2	TRUE	0.116916	21.9775
rs73231219	T	C	T	C	0.735643	-0.0521695	0.857143	0.94335	FALSE	FALSE	FALSE	3	140470530	0.156339	397953	0.73861	Guttate psoriasis || id:finngen_R10_L12_PSORI_GUTTATE	3	140189372	0.133959	1.47038e-07	168	Genus_Bacteroides_Dorsalforearm_Dry_PopGen || id:GCST90133229-1	2	TRUE	0.152188	29.7982
rs10786219	G	T	G	T	0.476433	-0.0860726	0.607735	0.674243	FALSE	FALSE	FALSE	10	95543030	0.0770103	397953	0.263705	Guttate psoriasis || id:finngen_R10_L12_PSORI_GUTTATE	10	97302787	0.103438	7.769e-06	181	Genus_Bacteroides_Volarforearm_Dry_PopGen || id:GCST90133229-2	2	TRUE	0.104914	20.9808
rs112758501	C	T	C	T	0.734544	-0.0789714	0.900552	0.942114	FALSE	FALSE	FALSE	2	52244531	0.15658	397953	0.614014	Guttate psoriasis || id:finngen_R10_L12_PSORI_GUTTATE	2	52471669	0.159241	7.54554e-06	181	Genus_Bacteroides_Volarforearm_Dry_PopGen || id:GCST90133229-2	2	TRUE	0.105191	21.0427
rs112882319	C	T	C	T	-0.885855	-0.0301693	0.917127	0.890528	FALSE	FALSE	FALSE	2	49198190	0.114277	397953	0.791777	Guttate psoriasis || id:finngen_R10_L12_PSORI_GUTTATE	2	49425329	0.179412	1.80422e-06	181	Genus_Bacteroides_Volarforearm_Dry_PopGen || id:GCST90133229-2	2	TRUE	0.118704	24.11
rs11701158	G	A	G	A	-0.559623	-0.0404525	0.734807	0.69833	FALSE	FALSE	FALSE	21	42941303	0.0787799	397953	0.60761	Guttate psoriasis || id:finngen_R10_L12_PSORI_GUTTATE	21	44361413	0.108516	6.604e-07	181	Genus_Bacteroides_Volarforearm_Dry_PopGen || id:GCST90133229-2	2	TRUE	0.128111	26.3014
rs1391569	A	T	A	T	-0.526073	-0.147943	0.767956	0.725257	FALSE	TRUE	FALSE	15	37708332	0.0804219	397953	0.0658294	Guttate psoriasis || id:finngen_R10_L12_PSORI_GUTTATE	15	38000533	0.113031	6.31076e-06	181	Genus_Bacteroides_Volarforearm_Dry_PopGen || id:GCST90133229-2	2	TRUE	0.106886	21.4224
rs1429955	T	C	T	C	-0.476523	-0.0198901	0.588398	0.630787	FALSE	FALSE	FALSE	8	40504108	0.0745473	397953	0.789614	Guttate psoriasis || id:finngen_R10_L12_PSORI_GUTTATE	8	40361627	0.0996016	3.57471e-06	181	Genus_Bacteroides_Volarforearm_Dry_PopGen || id:GCST90133229-2	2	TRUE	0.112264	22.6365
rs145438026	C	T	C	T	-0.918342	0.0921435	0.928177	0.967251	FALSE	FALSE	FALSE	2	156371743	0.204024	397953	0.651534	Guttate psoriasis || id:finngen_R10_L12_PSORI_GUTTATE	2	157228255	0.199208	7.63777e-06	181	Genus_Bacteroides_Volarforearm_Dry_PopGen || id:GCST90133229-2	2	TRUE	0.105076	21.017
rs17004734	A	G	A	G	-0.705987	-0.0725861	0.853591	0.858855	FALSE	FALSE	FALSE	21	45101543	0.104348	397953	0.48667	Guttate psoriasis || id:finngen_R10_L12_PSORI_GUTTATE	21	46521458	0.141241	1.36932e-06	181	Genus_Bacteroides_Volarforearm_Dry_PopGen || id:GCST90133229-2	2	TRUE	0.121293	24.7084
rs1883628	C	T	C	T	-0.795622	0.027448	0.906077	0.929519	FALSE	FALSE	FALSE	6	1058079	0.141374	397953	0.846058	Guttate psoriasis || id:finngen_R10_L12_PSORI_GUTTATE	6	1058314	0.172751	7.7823e-06	181	Genus_Bacteroides_Volarforearm_Dry_PopGen || id:GCST90133229-2	2	TRUE	0.104898	20.9772
rs283819	C	A	C	A	-0.543768	0.0477912	0.790055	0.813193	FALSE	FALSE	FALSE	2	79000117	0.0922435	397953	0.60439	Guttate psoriasis || id:finngen_R10_L12_PSORI_GUTTATE	2	79227243	0.115347	4.86238e-06	181	Genus_Bacteroides_Volarforearm_Dry_PopGen || id:GCST90133229-2	2	TRUE	0.109356	21.9781
rs342701	C	T	C	T	-0.56591	-0.06454	0.790055	0.783261	FALSE	FALSE	FALSE	13	91773603	0.0873913	397953	0.4602	Guttate psoriasis || id:finngen_R10_L12_PSORI_GUTTATE	13	92425857	0.121083	5.79905e-06	181	Genus_Bacteroides_Volarforearm_Dry_PopGen || id:GCST90133229-2	2	TRUE	0.107688	21.6024
rs34435660	C	T	C	T	-0.662063	-0.103553	0.859116	0.832231	FALSE	FALSE	FALSE	21	20340720	0.0964419	397953	0.282942	Guttate psoriasis || id:finngen_R10_L12_PSORI_GUTTATE	21	21713032	0.140355	4.80174e-06	181	Genus_Bacteroides_Volarforearm_Dry_PopGen || id:GCST90133229-2	2	TRUE	0.109475	22.0049
rs75565556	A	G	A	G	1.09046	0.00740802	0.950276	0.980502	FALSE	FALSE	FALSE	18	69156817	0.260311	397953	0.977297	Guttate psoriasis || id:finngen_R10_L12_PSORI_GUTTATE	18	66824054	0.233101	5.69093e-06	181	Genus_Bacteroides_Volarforearm_Dry_PopGen || id:GCST90133229-2	2	TRUE	0.107866	21.6425
rs78751417	C	T	C	T	0.768527	0.11422	0.89779	0.928385	FALSE	FALSE	FALSE	6	43836565	0.138448	397953	0.409371	Guttate psoriasis || id:finngen_R10_L12_PSORI_GUTTATE	6	43804302	0.167761	8.64489e-06	181	Genus_Bacteroides_Volarforearm_Dry_PopGen || id:GCST90133229-2	2	TRUE	0.1039	20.7544
rs8077283	T	C	T	C	-0.678809	-0.0559699	0.848066	0.857019	FALSE	FALSE	FALSE	17	10059955	0.102406	397953	0.584686	Guttate psoriasis || id:finngen_R10_L12_PSORI_GUTTATE	17	9963272	0.144225	5.02655e-06	181	Genus_Bacteroides_Volarforearm_Dry_PopGen || id:GCST90133229-2	2	TRUE	0.109042	21.9072
rs10860026	G	A	G	A	0.745665	0.0144637	0.875723	0.873368	FALSE	FALSE	FALSE	12	96369471	0.109628	397953	0.895036	Guttate psoriasis || id:finngen_R10_L12_PSORI_GUTTATE	12	96763249	0.155184	3.36808e-06	173	Genus_Anaerococcus_Dorsalforearm_Dry_PopGen || id:GCST90133230-1	2	TRUE	0.117744	22.8214
rs10937638	T	C	T	C	-0.650538	0.0157092	0.82948	0.798671	FALSE	FALSE	FALSE	4	5375515	0.0893387	397953	0.86042	Guttate psoriasis || id:finngen_R10_L12_PSORI_GUTTATE	4	5377242	0.13674	4.14916e-06	173	Genus_Anaerococcus_Dorsalforearm_Dry_PopGen || id:GCST90133230-1	2	TRUE	0.115694	22.372
rs114158060	A	G	A	G	0.84523	0.234746	0.904624	0.941253	FALSE	FALSE	FALSE	6	89551396	0.15308	397953	0.125157	Guttate psoriasis || id:finngen_R10_L12_PSORI_GUTTATE	6	90261115	0.181628	6.51113e-06	173	Genus_Anaerococcus_Dorsalforearm_Dry_PopGen || id:GCST90133230-1	2	TRUE	0.111254	21.4059
rs11818509	C	T	C	T	-0.76904	0.170555	0.884393	0.919549	FALSE	FALSE	FALSE	10	2837817	0.132005	397953	0.196343	Guttate psoriasis || id:finngen_R10_L12_PSORI_GUTTATE	10	2880009	0.16385	5.47967e-06	173	Genus_Anaerococcus_Dorsalforearm_Dry_PopGen || id:GCST90133230-1	2	TRUE	0.112955	21.7749
rs12956696	C	G	C	G	-1.08454	0.00865676	0.942197	0.943571	FALSE	TRUE	FALSE	18	39054262	0.155093	397953	0.955488	Guttate psoriasis || id:finngen_R10_L12_PSORI_GUTTATE	18	36634226	0.221892	2.33583e-06	173	Genus_Anaerococcus_Dorsalforearm_Dry_PopGen || id:GCST90133230-1	2	TRUE	0.121334	23.6133
rs1403026	A	G	A	G	-0.740491	0.101362	0.869942	0.923291	FALSE	FALSE	FALSE	3	149826153	0.135501	397953	0.454425	Guttate psoriasis || id:finngen_R10_L12_PSORI_GUTTATE	3	149543940	0.1485	1.49988e-06	173	Genus_Anaerococcus_Dorsalforearm_Dry_PopGen || id:GCST90133230-1	2	TRUE	0.125666	24.5774
rs16875319	T	G	T	G	-0.792044	0.0189751	0.872832	0.83198	FALSE	FALSE	FALSE	5	5319294	0.0979985	397953	0.846469	Guttate psoriasis || id:finngen_R10_L12_PSORI_GUTTATE	5	5319407	0.15263	5.92758e-07	173	Genus_Anaerococcus_Dorsalforearm_Dry_PopGen || id:GCST90133230-1	2	TRUE	0.134692	26.6176
rs1908208	A	C	A	C	-0.494847	-0.0545533	0.635838	0.556188	FALSE	FALSE	FALSE	16	19881414	0.0722781	397953	0.450387	Guttate psoriasis || id:finngen_R10_L12_PSORI_GUTTATE	16	19892736	0.107648	8.30397e-06	173	Genus_Anaerococcus_Dorsalforearm_Dry_PopGen || id:GCST90133230-1	2	TRUE	0.108851	20.8871
rs2358910	G	T	G	T	-0.457761	0.10804	0.523121	0.47978	FALSE	FALSE	FALSE	4	148753595	0.0721735	397953	0.134405	Guttate psoriasis || id:finngen_R10_L12_PSORI_GUTTATE	4	149674747	0.100504	9.93864e-06	173	Genus_Anaerococcus_Dorsalforearm_Dry_PopGen || id:GCST90133230-1	2	TRUE	0.107073	20.505
rs4318543	A	T	A	T	0.50086	-0.0315169	0.699422	0.715512	FALSE	TRUE	FALSE	3	4912971	0.0801663	397953	0.694213	Guttate psoriasis || id:finngen_R10_L12_PSORI_GUTTATE	3	4954656	0.108087	7.08846e-06	173	Genus_Anaerococcus_Dorsalforearm_Dry_PopGen || id:GCST90133230-1	2	TRUE	0.110415	21.2244
rs4997807	C	T	C	T	0.455842	-0.0207428	0.578035	0.587798	FALSE	FALSE	FALSE	7	156365978	0.0734023	397953	0.77749	Guttate psoriasis || id:finngen_R10_L12_PSORI_GUTTATE	7	156158672	0.098578	7.38901e-06	173	Genus_Anaerococcus_Dorsalforearm_Dry_PopGen || id:GCST90133230-1	2	TRUE	0.110005	21.1358
rs56214776	G	A	G	A	-0.688283	0.100332	0.869942	0.898961	FALSE	FALSE	FALSE	16	78011892	0.119672	397953	0.401812	Guttate psoriasis || id:finngen_R10_L12_PSORI_GUTTATE	16	78045789	0.149962	8.56161e-06	173	Genus_Anaerococcus_Dorsalforearm_Dry_PopGen || id:GCST90133230-1	2	TRUE	0.108549	20.822
rs6474615	T	C	T	C	-0.472202	-0.0598295	0.65896	0.645518	FALSE	FALSE	FALSE	9	11024277	0.0753451	397953	0.427153	Guttate psoriasis || id:finngen_R10_L12_PSORI_GUTTATE	9	11024277	0.102863	8.52949e-06	173	Genus_Anaerococcus_Dorsalforearm_Dry_PopGen || id:GCST90133230-1	2	TRUE	0.108586	20.83
rs6586815	G	C	G	C	-0.751455	-0.0578978	0.852601	0.853695	FALSE	TRUE	FALSE	8	16424002	0.102335	397953	0.571552	Guttate psoriasis || id:finngen_R10_L12_PSORI_GUTTATE	8	16281511	0.151133	1.59994e-06	173	Genus_Anaerococcus_Dorsalforearm_Dry_PopGen || id:GCST90133230-1	2	TRUE	0.125035	24.4364
rs73888313	C	T	C	T	-0.873208	0.139443	0.924855	0.92521	FALSE	FALSE	FALSE	22	42453192	0.136885	397953	0.30835	Guttate psoriasis || id:finngen_R10_L12_PSORI_GUTTATE	22	42849198	0.191672	9.89277e-06	173	Genus_Anaerococcus_Dorsalforearm_Dry_PopGen || id:GCST90133230-1	2	TRUE	0.107119	20.5148
rs7908505	A	G	A	G	0.448603	0.0870513	0.638728	0.562067	FALSE	FALSE	FALSE	10	82921307	0.0726217	397953	0.230646	Guttate psoriasis || id:finngen_R10_L12_PSORI_GUTTATE	10	84681063	0.0976333	8.3792e-06	173	Genus_Anaerococcus_Dorsalforearm_Dry_PopGen || id:GCST90133230-1	2	TRUE	0.108762	20.8678
rs838553	G	C	G	C	-0.489965	0.00136536	0.644509	0.630932	FALSE	TRUE	FALSE	2	233513464	0.0746312	397953	0.985404	Guttate psoriasis || id:finngen_R10_L12_PSORI_GUTTATE	2	234422110	0.103765	4.84651e-06	173	Genus_Anaerococcus_Dorsalforearm_Dry_PopGen || id:GCST90133230-1	2	TRUE	0.114165	22.0382
rs9370504	A	G	A	G	-0.501065	0.0532097	0.67052	0.667676	FALSE	FALSE	FALSE	6	56285233	0.0765018	397953	0.48672	Guttate psoriasis || id:finngen_R10_L12_PSORI_GUTTATE	6	56150031	0.106969	5.70591e-06	173	Genus_Anaerococcus_Dorsalforearm_Dry_PopGen || id:GCST90133230-1	2	TRUE	0.112556	21.6882
rs9484795	T	C	T	C	-0.741571	-0.00317549	0.783237	0.793777	FALSE	FALSE	FALSE	6	143700903	0.0888568	397953	0.971492	Guttate psoriasis || id:finngen_R10_L12_PSORI_GUTTATE	6	144022040	0.128234	3.41412e-08	173	Genus_Anaerococcus_Dorsalforearm_Dry_PopGen || id:GCST90133230-1	2	TRUE	0.161994	33.0558
rs1965662	C	T	C	T	0.534579	0.0160599	0.751397	0.669122	FALSE	FALSE	FALSE	18	54818849	0.0764061	397953	0.833518	Guttate psoriasis || id:finngen_R10_L12_PSORI_GUTTATE	18	52486080	0.117279	9.59475e-06	179	Genus_Anaerococcus_Volarforearm_Dry_PopGen || id:GCST90133230-2	2	TRUE	0.104001	20.5449
rs2500288	C	T	C	T	-0.475425	-0.0493167	0.530726	0.612175	FALSE	FALSE	FALSE	1	3297538	0.0740611	397953	0.50548	Guttate psoriasis || id:finngen_R10_L12_PSORI_GUTTATE	1	3214102	0.0974756	2.3835e-06	179	Genus_Anaerococcus_Volarforearm_Dry_PopGen || id:GCST90133230-2	2	TRUE	0.117308	23.523
rs6516034	G	A	G	A	0.481893	0.0187717	0.539106	0.496496	FALSE	FALSE	FALSE	20	5433900	0.0723345	397953	0.79524	Guttate psoriasis || id:finngen_R10_L12_PSORI_GUTTATE	20	5414546	0.104823	8.12105e-06	179	Genus_Anaerococcus_Volarforearm_Dry_PopGen || id:GCST90133230-2	2	TRUE	0.105601	20.8983
rs7307114	C	A	C	A	-0.599659	-0.089468	0.804469	0.792541	FALSE	FALSE	FALSE	12	26701016	0.0890055	397953	0.314802	Guttate psoriasis || id:finngen_R10_L12_PSORI_GUTTATE	12	26853949	0.124667	3.21459e-06	179	Genus_Anaerococcus_Volarforearm_Dry_PopGen || id:GCST90133230-2	2	TRUE	0.114461	22.8783
rs9310238	T	C	T	C	-0.444738	-0.0972283	0.5	0.488895	FALSE	FALSE	FALSE	3	72259375	0.0722223	397953	0.178226	Guttate psoriasis || id:finngen_R10_L12_PSORI_GUTTATE	3	72308526	0.0950618	5.72279e-06	179	Genus_Anaerococcus_Volarforearm_Dry_PopGen || id:GCST90133230-2	2	TRUE	0.108954	21.643
rs11055251	A	C	A	C	0.54369	-0.0265822	0.753061	0.629508	FALSE	FALSE	FALSE	12	13138092	0.074596	397953	0.721579	Guttate psoriasis || id:finngen_R10_L12_PSORI_GUTTATE	12	13291026	0.10589	5.80034e-07	245	Genus_Enhydrobacter_Dorsalforearm_Dry_PopGen || id:GCST90133231-1	2	TRUE	0.0971498	26.1477
rs112065281	T	C	T	C	-0.506991	0.0876677	0.834694	0.816791	FALSE	FALSE	FALSE	18	51646911	0.0926602	397953	0.344087	Guttate psoriasis || id:finngen_R10_L12_PSORI_GUTTATE	18	49173281	0.108922	5.33992e-06	245	Genus_Enhydrobacter_Dorsalforearm_Dry_PopGen || id:GCST90133231-1	2	TRUE	0.0812467	21.4888
rs11791149	T	C	T	C	-0.510922	-0.112382	0.816327	0.838606	FALSE	FALSE	FALSE	9	130629522	0.0977888	397953	0.250459	Guttate psoriasis || id:finngen_R10_L12_PSORI_GUTTATE	9	133504909	0.111485	7.33733e-06	245	Genus_Enhydrobacter_Dorsalforearm_Dry_PopGen || id:GCST90133231-1	2	TRUE	0.0789573	20.8314
rs434474	T	A	T	A	-0.454843	0.0112855	0.689796	0.696199	FALSE	TRUE	FALSE	1	4754057	0.0782254	397953	0.885288	Guttate psoriasis || id:finngen_R10_L12_PSORI_GUTTATE	1	4814117	0.0920145	1.43327e-06	245	Genus_Enhydrobacter_Dorsalforearm_Dry_PopGen || id:GCST90133231-1	2	TRUE	0.0906894	24.2354
rs55806473	A	T	A	T	-0.430967	0.043044	0.691837	0.653652	FALSE	TRUE	FALSE	16	5409039	0.0759312	397953	0.570795	Guttate psoriasis || id:finngen_R10_L12_PSORI_GUTTATE	16	5459040	0.0847501	7.342e-07	245	Genus_Enhydrobacter_Dorsalforearm_Dry_PopGen || id:GCST90133231-1	2	TRUE	0.0954695	25.6476
rs62257654	T	C	T	C	-0.561559	0.132262	0.814286	0.818776	FALSE	FALSE	FALSE	3	4043892	0.0935798	397953	0.157549	Guttate psoriasis || id:finngen_R10_L12_PSORI_GUTTATE	3	4085576	0.108625	4.89642e-07	245	Genus_Enhydrobacter_Dorsalforearm_Dry_PopGen || id:GCST90133231-1	2	TRUE	0.0983564	26.5078
rs12117900	C	G	C	G	-0.678651	0.0591207	0.896996	0.835815	FALSE	TRUE	FALSE	1	210432546	0.096975	397953	0.542094	Guttate psoriasis || id:finngen_R10_L12_PSORI_GUTTATE	1	210605890	0.142493	3.37395e-06	233	Genus_Enhydrobacter_Volarforearm_Dry_PopGen || id:GCST90133231-2	2	TRUE	0.0887168	22.4887
rs12586414	G	T	G	T	-0.517588	0.004022	0.798283	0.735462	FALSE	FALSE	FALSE	14	100837902	0.081563	397953	0.960671	Guttate psoriasis || id:finngen_R10_L12_PSORI_GUTTATE	14	101304239	0.105467	1.74193e-06	233	Genus_Enhydrobacter_Volarforearm_Dry_PopGen || id:GCST90133231-2	2	TRUE	0.0936821	23.8775
rs12965141	G	C	G	C	-0.472953	-0.118941	0.770386	0.74493	FALSE	TRUE	FALSE	18	43815744	0.08243	397953	0.149041	Guttate psoriasis || id:finngen_R10_L12_PSORI_GUTTATE	18	41395709	0.103732	8.32246e-06	233	Genus_Enhydrobacter_Volarforearm_Dry_PopGen || id:GCST90133231-2	2	TRUE	0.0819102	20.6094
rs1334751	T	C	T	C	0.595221	0.193391	0.839056	0.670944	FALSE	FALSE	FALSE	10	28728644	0.0771783	397953	0.0122186	Guttate psoriasis || id:finngen_R10_L12_PSORI_GUTTATE	10	29017573	0.128047	5.62399e-06	233	Genus_Enhydrobacter_Volarforearm_Dry_PopGen || id:GCST90133231-2	2	TRUE	0.0848682	21.4227
rs1401283	G	A	G	A	-0.381361	-0.0136958	0.630901	0.683952	FALSE	FALSE	FALSE	2	170278536	0.0793397	397953	0.862949	Guttate psoriasis || id:finngen_R10_L12_PSORI_GUTTATE	2	171135046	0.0829281	7.00509e-06	233	Genus_Enhydrobacter_Volarforearm_Dry_PopGen || id:GCST90133231-2	2	TRUE	0.0832114	20.9665
rs141500492	T	C	T	C	0.81967	-0.0473086	0.929185	0.933574	FALSE	FALSE	FALSE	2	38430056	0.144102	397953	0.742686	Guttate psoriasis || id:finngen_R10_L12_PSORI_GUTTATE	2	38657198	0.178369	7.10865e-06	233	Genus_Enhydrobacter_Volarforearm_Dry_PopGen || id:GCST90133231-2	2	TRUE	0.0831007	20.9361
rs1425130	A	C	A	C	0.418714	-0.0794832	0.560086	0.628279	FALSE	FALSE	FALSE	7	37519127	0.0746094	397953	0.286729	Guttate psoriasis || id:finngen_R10_L12_PSORI_GUTTATE	7	37558730	0.0910778	7.04765e-06	233	Genus_Enhydrobacter_Volarforearm_Dry_PopGen || id:GCST90133231-2	2	TRUE	0.0831657	20.9539
rs1491121	T	A	T	A	-0.503535	0.0147855	0.783262	0.762732	FALSE	TRUE	FALSE	9	106753141	0.0847959	397953	0.861578	Guttate psoriasis || id:finngen_R10_L12_PSORI_GUTTATE	9	109515422	0.111068	9.3123e-06	233	Genus_Enhydrobacter_Volarforearm_Dry_PopGen || id:GCST90133231-2	2	TRUE	0.0810612	20.3769
rs6496260	A	C	A	C	-0.41171	0.0340924	0.56867	0.540329	FALSE	FALSE	FALSE	15	97838255	0.0724378	397953	0.637896	Guttate psoriasis || id:finngen_R10_L12_PSORI_GUTTATE	15	98381485	0.0849929	2.33184e-06	233	Genus_Enhydrobacter_Volarforearm_Dry_PopGen || id:GCST90133231-2	2	TRUE	0.0914935	23.2635
rs9828670	G	A	G	A	-0.425327	-0.00817228	0.579399	0.646778	FALSE	FALSE	FALSE	3	66666385	0.0756983	397953	0.914029	Guttate psoriasis || id:finngen_R10_L12_PSORI_GUTTATE	3	66716809	0.0856588	1.33254e-06	233	Genus_Enhydrobacter_Volarforearm_Dry_PopGen || id:GCST90133231-2	2	TRUE	0.0956896	24.4433
rs111743743	C	A	C	A	-0.855623	-0.125143	0.929612	0.936905	FALSE	FALSE	FALSE	3	43818836	0.147311	397953	0.395594	Guttate psoriasis || id:finngen_R10_L12_PSORI_GUTTATE	3	43860328	0.18766	8.83546e-06	206	Genus_Micrococcus_Dorsalforearm_Dry_PopGen || id:GCST90133232-1	2	TRUE	0.0916643	20.5866
rs11764256	A	G	A	G	-0.413861	-0.154027	0.558252	0.503323	FALSE	FALSE	FALSE	7	37701701	0.0718626	397953	0.0320848	Guttate psoriasis || id:finngen_R10_L12_PSORI_GUTTATE	7	37741303	0.0904426	8.22596e-06	206	Genus_Micrococcus_Dorsalforearm_Dry_PopGen || id:GCST90133232-1	2	TRUE	0.0922685	20.7361
rs140949500	G	A	G	A	-0.882304	0.0590076	0.93932	0.943114	FALSE	FALSE	FALSE	3	101728461	0.155056	397953	0.703532	Guttate psoriasis || id:finngen_R10_L12_PSORI_GUTTATE	3	101447305	0.191127	6.90255e-06	206	Genus_Micrococcus_Dorsalforearm_Dry_PopGen || id:GCST90133232-1	2	TRUE	0.0937503	21.1035
rs17084026	C	T	C	T	-0.647219	0.092172	0.856796	0.89611	FALSE	FALSE	FALSE	13	64271111	0.117479	397953	0.4327	Guttate psoriasis || id:finngen_R10_L12_PSORI_GUTTATE	13	64845243	0.123214	3.75534e-07	206	Genus_Micrococcus_Dorsalforearm_Dry_PopGen || id:GCST90133232-1	2	TRUE	0.11812	27.3241
rs2664121	T	G	T	G	-0.629771	-0.0205451	0.75	0.701634	FALSE	FALSE	FALSE	3	9122413	0.0786689	397953	0.79397	Guttate psoriasis || id:finngen_R10_L12_PSORI_GUTTATE	3	9164097	0.102627	4.31981e-09	206	Genus_Micrococcus_Dorsalforearm_Dry_PopGen || id:GCST90133232-1	2	TRUE	0.154549	37.2913
rs77505408	G	A	G	A	-0.982032	0.0781187	0.949029	0.893405	FALSE	FALSE	FALSE	3	55564566	0.118395	397953	0.509374	Guttate psoriasis || id:finngen_R10_L12_PSORI_GUTTATE	3	55598594	0.215739	9.12528e-06	206	Genus_Micrococcus_Dorsalforearm_Dry_PopGen || id:GCST90133232-1	2	TRUE	0.0913914	20.5191
rs10142830	G	A	G	A	0.525342	0.0409624	0.704082	0.650876	FALSE	FALSE	FALSE	14	96251460	0.0757092	397953	0.588474	Guttate psoriasis || id:finngen_R10_L12_PSORI_GUTTATE	14	96717797	0.108894	2.836e-06	196	Genus_Micrococcus_Volarforearm_Dry_PopGen || id:GCST90133232-2	2	TRUE	0.106141	23.0366
rs12477082	T	C	T	C	-0.616321	0.193097	0.857143	0.831457	FALSE	FALSE	FALSE	2	55146800	0.0963807	397953	0.0451253	Guttate psoriasis || id:finngen_R10_L12_PSORI_GUTTATE	2	55373936	0.129516	3.80045e-06	196	Genus_Micrococcus_Volarforearm_Dry_PopGen || id:GCST90133232-2	2	TRUE	0.103568	22.4135
rs142188220	C	T	C	T	-0.860869	0.241843	0.936224	0.946572	FALSE	FALSE	FALSE	3	14915698	0.160984	397953	0.133025	Guttate psoriasis || id:finngen_R10_L12_PSORI_GUTTATE	3	14957205	0.184171	5.51067e-06	196	Genus_Micrococcus_Volarforearm_Dry_PopGen || id:GCST90133232-2	2	TRUE	0.100294	21.6261
rs3782447	A	C	A	C	-0.480893	0.0858086	0.632653	0.680165	FALSE	FALSE	FALSE	12	113875211	0.0773167	397953	0.267071	Guttate psoriasis || id:finngen_R10_L12_PSORI_GUTTATE	12	114313016	0.0980137	1.95953e-06	196	Genus_Micrococcus_Volarforearm_Dry_PopGen || id:GCST90133232-2	2	TRUE	0.109385	23.827
rs4768565	T	C	T	C	-1.07744	-0.157776	0.951531	0.873729	FALSE	FALSE	FALSE	12	39099256	0.109176	397953	0.148415	Guttate psoriasis || id:finngen_R10_L12_PSORI_GUTTATE	12	39493058	0.225361	3.44189e-06	196	Genus_Micrococcus_Volarforearm_Dry_PopGen || id:GCST90133232-2	2	TRUE	0.10444	22.6242
rs6871719	A	G	A	G	-0.652051	-0.11824	0.854592	0.83653	FALSE	FALSE	FALSE	5	3872730	0.0983472	397953	0.22926	Guttate psoriasis || id:finngen_R10_L12_PSORI_GUTTATE	5	3872844	0.133882	2.30641e-06	196	Genus_Micrococcus_Volarforearm_Dry_PopGen || id:GCST90133232-2	2	TRUE	0.107956	23.478
rs7848343	C	T	C	T	-0.991752	-0.135854	0.941327	0.905938	FALSE	FALSE	FALSE	9	16510626	0.124075	397953	0.273542	Guttate psoriasis || id:finngen_R10_L12_PSORI_GUTTATE	9	16510624	0.207153	3.34242e-06	196	Genus_Micrococcus_Volarforearm_Dry_PopGen || id:GCST90133232-2	2	TRUE	0.104698	22.6866
rs8048962	T	C	T	C	0.433879	-0.0833705	0.487245	0.464471	FALSE	FALSE	FALSE	16	83052913	0.0725388	397953	0.250423	Guttate psoriasis || id:finngen_R10_L12_PSORI_GUTTATE	16	83086518	0.0932003	5.98664e-06	196	Genus_Micrococcus_Volarforearm_Dry_PopGen || id:GCST90133232-2	2	TRUE	0.0995634	21.451
rs944413	A	C	A	C	0.446211	0.076537	0.548469	0.448966	FALSE	FALSE	FALSE	21	34022442	0.0722179	397953	0.289232	Guttate psoriasis || id:finngen_R10_L12_PSORI_GUTTATE	21	35394743	0.0937939	3.822e-06	196	Genus_Micrococcus_Volarforearm_Dry_PopGen || id:GCST90133232-2	2	TRUE	0.103518	22.4015
rs10999373	G	A	G	A	-0.81079	0.0972316	0.916309	0.838827	FALSE	FALSE	FALSE	10	70525731	0.0982901	397953	0.32255	Guttate psoriasis || id:finngen_R10_L12_PSORI_GUTTATE	10	72285487	0.167429	2.34734e-06	233	Genus_Streptococcus_Dorsalforearm_Dry_PopGen || id:GCST90133234-1	2	TRUE	0.0914438	23.2495
rs11263700	G	A	G	A	-0.426762	-0.0591223	0.633047	0.628541	FALSE	FALSE	FALSE	15	27044869	0.0744671	397953	0.427231	Guttate psoriasis || id:finngen_R10_L12_PSORI_GUTTATE	15	27290016	0.0933565	7.89898e-06	233	Genus_Streptococcus_Dorsalforearm_Dry_PopGen || id:GCST90133234-1	2	TRUE	0.0823047	20.7175
rs1468231	C	T	C	T	-0.424383	0.0680643	0.648069	0.733636	FALSE	FALSE	FALSE	4	104571665	0.0813028	397953	0.402496	Guttate psoriasis || id:finngen_R10_L12_PSORI_GUTTATE	4	105492822	0.0910433	5.3117e-06	233	Genus_Streptococcus_Dorsalforearm_Dry_PopGen || id:GCST90133234-1	2	TRUE	0.085299	21.5415
rs2183307	C	T	C	T	0.616703	0.0144876	0.875536	0.909244	FALSE	FALSE	FALSE	20	857617	0.125782	397953	0.908303	Guttate psoriasis || id:finngen_R10_L12_PSORI_GUTTATE	20	838260	0.136324	9.71646e-06	233	Genus_Streptococcus_Dorsalforearm_Dry_PopGen || id:GCST90133234-1	2	TRUE	0.08074	20.2891
rs2977806	T	C	T	C	-0.431465	0.0394118	0.523605	0.4907	FALSE	FALSE	FALSE	8	6835446	0.0721527	397953	0.58491	Guttate psoriasis || id:finngen_R10_L12_PSORI_GUTTATE	8	6692968	0.0866973	1.26413e-06	233	Genus_Streptococcus_Dorsalforearm_Dry_PopGen || id:GCST90133234-1	2	TRUE	0.0960842	24.5548
rs55985964	A	G	A	G	-0.685423	-0.0560264	0.89485	0.913849	FALSE	FALSE	FALSE	8	32298837	0.128785	397953	0.663535	Guttate psoriasis || id:finngen_R10_L12_PSORI_GUTTATE	8	32156353	0.150349	8.34046e-06	233	Genus_Streptococcus_Dorsalforearm_Dry_PopGen || id:GCST90133234-1	2	TRUE	0.0818939	20.6049
rs56865570	C	T	C	T	-0.682057	-0.0543112	0.888412	0.911035	FALSE	FALSE	FALSE	5	1654566	0.126741	397953	0.668272	Guttate psoriasis || id:finngen_R10_L12_PSORI_GUTTATE	5	1654681	0.143428	3.48711e-06	233	Genus_Streptococcus_Dorsalforearm_Dry_PopGen || id:GCST90133234-1	2	TRUE	0.0884686	22.4197
rs60368176	T	C	T	C	-0.419083	0.0140178	0.665236	0.615025	FALSE	FALSE	FALSE	3	8206173	0.0739163	397953	0.849588	Guttate psoriasis || id:finngen_R10_L12_PSORI_GUTTATE	3	8247860	0.0898314	5.22091e-06	233	Genus_Streptococcus_Dorsalforearm_Dry_PopGen || id:GCST90133234-1	2	TRUE	0.0854289	21.5774
rs648161	A	G	A	G	-0.425907	-0.047385	0.624464	0.648487	FALSE	FALSE	FALSE	18	7042403	0.0763421	397953	0.534802	Guttate psoriasis || id:finngen_R10_L12_PSORI_GUTTATE	18	7042402	0.091468	5.4305e-06	233	Genus_Streptococcus_Dorsalforearm_Dry_PopGen || id:GCST90133234-1	2	TRUE	0.0851322	21.4955
rs7215354	G	A	G	A	-0.47275	0.120819	0.746781	0.720286	FALSE	FALSE	FALSE	17	50644879	0.0808545	397953	0.135104	Guttate psoriasis || id:finngen_R10_L12_PSORI_GUTTATE	17	48722240	0.103243	7.6369e-06	233	Genus_Streptococcus_Dorsalforearm_Dry_PopGen || id:GCST90133234-1	2	TRUE	0.0825595	20.7874
rs72808194	G	C	G	C	-0.7456	-0.0215293	0.916309	0.908627	FALSE	TRUE	FALSE	5	159918615	0.12471	397953	0.862938	Guttate psoriasis || id:finngen_R10_L12_PSORI_GUTTATE	5	159345622	0.16334	8.1307e-06	233	Genus_Streptococcus_Dorsalforearm_Dry_PopGen || id:GCST90133234-1	2	TRUE	0.0820863	20.6576
rs957231	G	A	G	A	-0.638355	0.221509	0.845494	0.860715	FALSE	FALSE	FALSE	3	150999132	0.104037	397953	0.0332437	Guttate psoriasis || id:finngen_R10_L12_PSORI_GUTTATE	3	150716919	0.120305	2.62171e-07	233	Genus_Streptococcus_Dorsalforearm_Dry_PopGen || id:GCST90133234-1	2	TRUE	0.107809	27.9133
rs12460776	G	A	G	A	-0.876079	0.0648159	0.944444	0.930792	FALSE	FALSE	FALSE	19	54687475	0.142686	397953	0.649645	Guttate psoriasis || id:finngen_R10_L12_PSORI_GUTTATE	19	55198771	0.191748	7.9666e-06	234	Genus_Streptococcus_Volarforearm_Dry_PopGen || id:GCST90133234-2	2	TRUE	0.0819027	20.6965
rs16905575	T	G	T	G	-0.684837	0.138497	0.90812	0.896749	FALSE	FALSE	FALSE	9	117384493	0.118931	397953	0.244216	Guttate psoriasis || id:finngen_R10_L12_PSORI_GUTTATE	9	120146772	0.142453	2.74843e-06	234	Genus_Streptococcus_Volarforearm_Dry_PopGen || id:GCST90133234-2	2	TRUE	0.0898898	22.9142
rs17384121	C	T	C	T	-0.810447	-0.0822019	0.938034	0.900941	FALSE	FALSE	FALSE	9	118941150	0.121257	397953	0.497828	Guttate psoriasis || id:finngen_R10_L12_PSORI_GUTTATE	9	121703428	0.177176	7.78234e-06	234	Genus_Streptococcus_Volarforearm_Dry_PopGen || id:GCST90133234-2	2	TRUE	0.0820787	20.745
rs28661929	G	T	G	T	-0.7494	-0.0970519	0.901709	0.92774	FALSE	FALSE	FALSE	15	35726433	0.138969	397953	0.484944	Guttate psoriasis || id:finngen_R10_L12_PSORI_GUTTATE	15	36018634	0.157509	3.44137e-06	234	Genus_Streptococcus_Volarforearm_Dry_PopGen || id:GCST90133234-2	2	TRUE	0.0882056	22.4433
rs61942139	G	A	G	A	0.553676	0.00852298	0.83547	0.870272	FALSE	FALSE	FALSE	12	106269985	0.106967	397953	0.936493	Guttate psoriasis || id:finngen_R10_L12_PSORI_GUTTATE	12	106663763	0.12247	9.81956e-06	234	Genus_Streptococcus_Volarforearm_Dry_PopGen || id:GCST90133234-2	2	TRUE	0.0803289	20.2641
rs7222487	T	G	T	G	0.68131	-0.178619	0.867521	0.873596	FALSE	FALSE	FALSE	17	879659	0.107827	397953	0.0976158	Guttate psoriasis || id:finngen_R10_L12_PSORI_GUTTATE	17	782899	0.135276	9.5279e-07	234	Genus_Streptococcus_Volarforearm_Dry_PopGen || id:GCST90133234-2	2	TRUE	0.0977995	25.1491
rs12893622	C	T	C	T	-1.10345	0.118474	0.936364	0.921365	FALSE	FALSE	FALSE	14	52208926	0.132755	397953	0.372165	Guttate psoriasis || id:finngen_R10_L12_PSORI_GUTTATE	14	52675644	0.215461	8.47476e-07	165	Genus_Chryseobacterium_Dorsalforearm_Dry_PopGen || id:GCST90133236-1	2	TRUE	0.137158	25.9105
rs13211056	A	G	A	G	-0.488296	0.135603	0.587879	0.605103	FALSE	FALSE	FALSE	6	20961640	0.0735803	397953	0.0653401	Guttate psoriasis || id:finngen_R10_L12_PSORI_GUTTATE	6	20961871	0.100176	2.57137e-06	165	Genus_Chryseobacterium_Dorsalforearm_Dry_PopGen || id:GCST90133236-1	2	TRUE	0.125872	23.4715
rs2012235	T	C	T	C	-0.524204	0.103632	0.681818	0.655798	FALSE	FALSE	FALSE	1	68447072	0.0761502	397953	0.173551	Guttate psoriasis || id:finngen_R10_L12_PSORI_GUTTATE	1	68912755	0.11314	7.33033e-06	165	Genus_Chryseobacterium_Dorsalforearm_Dry_PopGen || id:GCST90133236-1	2	TRUE	0.115124	21.2065
rs3807302	T	C	T	C	0.489323	0.0445247	0.642424	0.722435	FALSE	FALSE	FALSE	7	129004803	0.0800588	397953	0.578108	Guttate psoriasis || id:finngen_R10_L12_PSORI_GUTTATE	7	128644857	0.104583	6.0309e-06	165	Genus_Chryseobacterium_Dorsalforearm_Dry_PopGen || id:GCST90133236-1	2	TRUE	0.117132	21.6256
rs665207	G	T	G	T	-0.744956	-0.0298268	0.845455	0.837109	FALSE	FALSE	FALSE	18	22514315	0.0973052	397953	0.759203	Guttate psoriasis || id:finngen_R10_L12_PSORI_GUTTATE	18	20094278	0.143346	5.99167e-07	165	Genus_Chryseobacterium_Dorsalforearm_Dry_PopGen || id:GCST90133236-1	2	TRUE	0.140661	26.6806
rs9381217	A	G	A	G	-0.904829	0.114007	0.927273	0.957022	FALSE	FALSE	FALSE	6	42761634	0.176624	397953	0.518617	Guttate psoriasis || id:finngen_R10_L12_PSORI_GUTTATE	6	42729372	0.197125	8.80493e-06	165	Genus_Chryseobacterium_Dorsalforearm_Dry_PopGen || id:GCST90133236-1	2	TRUE	0.113234	20.814
rs2400118	A	G	A	G	0.51419	0.0226839	0.722222	0.743159	FALSE	FALSE	FALSE	10	15106149	0.0821508	397953	0.782453	Guttate psoriasis || id:finngen_R10_L12_PSORI_GUTTATE	10	15148148	0.111925	8.76407e-06	162	Genus_Chryseobacterium_Volarforearm_Dry_PopGen || id:GCST90133236-2	2	TRUE	0.115263	20.8447
rs6555076	C	T	C	T	0.545129	-0.130007	0.450617	0.547299	FALSE	FALSE	FALSE	5	2272499	0.0725157	397953	0.0730046	Guttate psoriasis || id:finngen_R10_L12_PSORI_GUTTATE	5	2272613	0.110625	2.06075e-06	162	Genus_Chryseobacterium_Volarforearm_Dry_PopGen || id:GCST90133236-2	2	TRUE	0.130353	23.9826
rs6594434	G	A	G	A	-0.680321	-0.118945	0.824074	0.868248	FALSE	FALSE	FALSE	5	110160435	0.106934	397953	0.266003	Guttate psoriasis || id:finngen_R10_L12_PSORI_GUTTATE	5	109496136	0.138535	2.22102e-06	162	Genus_Chryseobacterium_Volarforearm_Dry_PopGen || id:GCST90133236-2	2	TRUE	0.129576	23.8185
rs7302235	T	C	T	C	-0.547382	-0.0645763	0.753086	0.787408	FALSE	FALSE	FALSE	12	47899055	0.0879334	397953	0.462719	Guttate psoriasis || id:finngen_R10_L12_PSORI_GUTTATE	12	48292838	0.116265	5.38648e-06	162	Genus_Chryseobacterium_Volarforearm_Dry_PopGen || id:GCST90133236-2	2	TRUE	0.120357	21.8919
rs7339361	C	T	C	T	-0.969383	-0.0505712	0.938272	0.930468	FALSE	FALSE	FALSE	13	108851784	0.142445	397953	0.722572	Guttate psoriasis || id:finngen_R10_L12_PSORI_GUTTATE	13	109504132	0.212009	9.6055e-06	162	Genus_Chryseobacterium_Volarforearm_Dry_PopGen || id:GCST90133236-2	2	TRUE	0.114301	20.6483
rs12540948	A	T	A	T	-0.893188	0.382335	0.933921	0.969142	FALSE	TRUE	FALSE	7	12664197	0.209042	397953	0.0674016	Guttate psoriasis || id:finngen_R10_L12_PSORI_GUTTATE	7	12703822	0.186236	2.94483e-06	227	Genus_Acinetobacter_Dorsalforearm_Dry_PopGen || id:GCST90133237-1	2	TRUE	0.0920061	22.799
rs1959553	C	T	C	T	-0.414792	0.167075	0.601322	0.550648	FALSE	FALSE	FALSE	14	48724098	0.0723067	397953	0.0208526	Guttate psoriasis || id:finngen_R10_L12_PSORI_GUTTATE	14	49193301	0.0898252	6.52354e-06	227	Genus_Acinetobacter_Dorsalforearm_Dry_PopGen || id:GCST90133237-1	2	TRUE	0.085871	21.1359
rs2031063	T	C	T	C	-0.45696	0.0511913	0.689427	0.718916	FALSE	FALSE	FALSE	14	21534209	0.0831163	397953	0.537961	Guttate psoriasis || id:finngen_R10_L12_PSORI_GUTTATE	14	22002343	0.10101	9.82639e-06	227	Genus_Acinetobacter_Dorsalforearm_Dry_PopGen || id:GCST90133237-1	2	TRUE	0.0827022	20.2857
rs304020	T	C	T	C	-0.597734	-0.0852595	0.803965	0.79888	FALSE	FALSE	FALSE	3	4523544	0.0899847	397953	0.343389	Guttate psoriasis || id:finngen_R10_L12_PSORI_GUTTATE	3	4565228	0.114133	3.74036e-07	227	Genus_Acinetobacter_Dorsalforearm_Dry_PopGen || id:GCST90133237-1	2	TRUE	0.107803	27.1863
rs36125261	T	G	T	G	0.574782	0.2565	0.834802	0.855079	FALSE	FALSE	FALSE	4	136431847	0.102081	397953	0.0119806	Guttate psoriasis || id:finngen_R10_L12_PSORI_GUTTATE	4	137353002	0.120533	3.33204e-06	227	Genus_Acinetobacter_Dorsalforearm_Dry_PopGen || id:GCST90133237-1	2	TRUE	0.0910548	22.5397
rs3827962	T	C	T	C	-0.558491	0.0151682	0.823789	0.812139	FALSE	FALSE	FALSE	20	20535376	0.0923086	397953	0.869479	Guttate psoriasis || id:finngen_R10_L12_PSORI_GUTTATE	20	20516020	0.117212	3.3905e-06	227	Genus_Acinetobacter_Dorsalforearm_Dry_PopGen || id:GCST90133237-1	2	TRUE	0.0909208	22.5032
rs62068856	G	A	G	A	0.519019	-0.086569	0.801762	0.675685	FALSE	FALSE	FALSE	17	70900034	0.0771224	397953	0.261655	Guttate psoriasis || id:finngen_R10_L12_PSORI_GUTTATE	17	68896175	0.112098	6.18025e-06	227	Genus_Acinetobacter_Dorsalforearm_Dry_PopGen || id:GCST90133237-1	2	TRUE	0.0862887	21.2485
rs7259156	G	A	G	A	-0.86694	-0.0887982	0.927313	0.861603	FALSE	FALSE	FALSE	19	10387790	0.104617	397953	0.395996	Guttate psoriasis || id:finngen_R10_L12_PSORI_GUTTATE	19	10498466	0.178749	2.30361e-06	227	Genus_Acinetobacter_Dorsalforearm_Dry_PopGen || id:GCST90133237-1	2	TRUE	0.0938954	23.3157
rs75113394	G	T	G	T	-0.933056	-0.0808189	0.947137	0.9453	FALSE	FALSE	FALSE	17	74117633	0.157278	397953	0.60735	Guttate psoriasis || id:finngen_R10_L12_PSORI_GUTTATE	17	72113772	0.206168	9.751e-06	227	Genus_Acinetobacter_Dorsalforearm_Dry_PopGen || id:GCST90133237-1	2	TRUE	0.0827618	20.3016
rs76950018	C	T	C	T	-0.623869	-0.0258614	0.865639	0.886851	FALSE	FALSE	FALSE	3	82360196	0.114112	397953	0.82071	Guttate psoriasis || id:finngen_R10_L12_PSORI_GUTTATE	3	82409347	0.136918	8.52978e-06	227	Genus_Acinetobacter_Dorsalforearm_Dry_PopGen || id:GCST90133237-1	2	TRUE	0.0837975	20.5789
rs111677838	A	G	A	G	-0.892773	0.0293396	0.933628	0.970506	FALSE	FALSE	FALSE	7	114995057	0.214969	397953	0.89144	Guttate psoriasis || id:finngen_R10_L12_PSORI_GUTTATE	7	114635111	0.185779	2.82706e-06	226	Genus_Acinetobacter_Volarforearm_Dry_PopGen || id:GCST90133237-2	2	TRUE	0.0927103	22.8892
rs13404351	A	G	A	G	-0.639639	-0.0834702	0.873894	0.888686	FALSE	FALSE	FALSE	2	38231593	0.114471	397953	0.46589	Guttate psoriasis || id:finngen_R10_L12_PSORI_GUTTATE	2	38458735	0.139352	7.38182e-06	226	Genus_Acinetobacter_Volarforearm_Dry_PopGen || id:GCST90133237-2	2	TRUE	0.0852758	20.8826
rs149780745	C	T	C	T	-0.71511	0.11178	0.915929	0.926152	FALSE	FALSE	FALSE	5	75097923	0.136967	397953	0.414437	Guttate psoriasis || id:finngen_R10_L12_PSORI_GUTTATE	5	74393748	0.155093	6.73998e-06	226	Genus_Acinetobacter_Volarforearm_Dry_PopGen || id:GCST90133237-2	2	TRUE	0.0859819	21.0717
rs2405112	G	A	G	A	-0.517864	-0.0413897	0.800885	0.702258	FALSE	FALSE	FALSE	4	135481558	0.0785762	397953	0.59837	Guttate psoriasis || id:finngen_R10_L12_PSORI_GUTTATE	4	136402713	0.113672	8.57464e-06	226	Genus_Acinetobacter_Volarforearm_Dry_PopGen || id:GCST90133237-2	2	TRUE	0.0841125	20.5715
rs2780993	C	A	C	A	0.466854	-0.0709737	0.75885	0.749919	FALSE	FALSE	FALSE	9	83573298	0.0833303	397953	0.394372	Guttate psoriasis || id:finngen_R10_L12_PSORI_GUTTATE	9	86188213	0.101136	6.58649e-06	226	Genus_Acinetobacter_Volarforearm_Dry_PopGen || id:GCST90133237-2	2	TRUE	0.0861607	21.1197
rs62109119	A	C	A	C	0.716067	-0.161741	0.900442	0.880703	FALSE	FALSE	FALSE	19	13339561	0.111483	397953	0.14683	Guttate psoriasis || id:finngen_R10_L12_PSORI_GUTTATE	19	13450375	0.154112	5.76291e-06	226	Genus_Acinetobacter_Volarforearm_Dry_PopGen || id:GCST90133237-2	2	TRUE	0.0871969	21.3979
rs73162649	T	G	T	G	0.690314	-0.00235641	0.896018	0.908439	FALSE	FALSE	FALSE	12	129981163	0.124524	397953	0.984902	Guttate psoriasis || id:finngen_R10_L12_PSORI_GUTTATE	12	130465708	0.147986	5.31442e-06	226	Genus_Acinetobacter_Volarforearm_Dry_PopGen || id:GCST90133237-2	2	TRUE	0.087825	21.5669
rs76548567	A	G	A	G	-0.742535	-0.139352	0.90708	0.906645	FALSE	FALSE	FALSE	11	21465183	0.123518	397953	0.25924	Guttate psoriasis || id:finngen_R10_L12_PSORI_GUTTATE	11	21486729	0.153208	2.34642e-06	226	Genus_Acinetobacter_Volarforearm_Dry_PopGen || id:GCST90133237-2	2	TRUE	0.0941497	23.2815
rs11569020	A	G	A	G	-0.928615	0.224604	0.930108	0.936075	FALSE	FALSE	FALSE	4	109981913	0.146106	397953	0.124227	Guttate psoriasis || id:finngen_R10_L12_PSORI_GUTTATE	4	110903069	0.197451	5.01765e-06	186	Genus_Paracoccus_Dorsalforearm_Dry_PopGen || id:GCST90133238-1	2	TRUE	0.106278	21.8805
rs12583353	A	G	A	G	-0.720948	0.137684	0.889785	0.851355	FALSE	FALSE	FALSE	13	37493438	0.102628	397953	0.179731	Guttate psoriasis || id:finngen_R10_L12_PSORI_GUTTATE	13	38067575	0.156002	7.15289e-06	186	Genus_Paracoccus_Dorsalforearm_Dry_PopGen || id:GCST90133238-1	2	TRUE	0.102998	21.1278
rs17241022	G	A	G	A	-0.811424	-0.086114	0.895161	0.875006	FALSE	FALSE	FALSE	16	57920621	0.108966	397953	0.429363	Guttate psoriasis || id:finngen_R10_L12_PSORI_GUTTATE	16	57954525	0.161806	1.24368e-06	186	Genus_Paracoccus_Dorsalforearm_Dry_PopGen || id:GCST90133238-1	2	TRUE	0.119102	24.8777
rs640184	G	A	G	A	-0.639823	-0.0241193	0.857527	0.855364	FALSE	FALSE	FALSE	9	98354047	0.1024	397953	0.813791	Guttate psoriasis || id:finngen_R10_L12_PSORI_GUTTATE	9	101116329	0.131723	2.53531e-06	186	Genus_Paracoccus_Dorsalforearm_Dry_PopGen || id:GCST90133238-1	2	TRUE	0.112569	23.3402
rs643106	T	A	T	A	-0.93612	0.019449	0.932796	0.925321	FALSE	TRUE	FALSE	7	125148521	0.136562	397953	0.88675	Guttate psoriasis || id:finngen_R10_L12_PSORI_GUTTATE	7	124788575	0.200937	6.08459e-06	186	Genus_Paracoccus_Dorsalforearm_Dry_PopGen || id:GCST90133238-1	2	TRUE	0.104495	21.4707
rs6996139	C	T	C	T	-0.483451	-0.00890139	0.629032	0.662873	FALSE	FALSE	FALSE	8	129543825	0.0761034	397953	0.906888	Guttate psoriasis || id:finngen_R10_L12_PSORI_GUTTATE	8	130556071	0.102039	4.30599e-06	186	Genus_Paracoccus_Dorsalforearm_Dry_PopGen || id:GCST90133238-1	2	TRUE	0.10769	22.2063
rs7117184	G	A	G	A	-0.767815	-0.00610155	0.903226	0.930444	FALSE	FALSE	FALSE	11	88341550	0.14101	397953	0.965486	Guttate psoriasis || id:finngen_R10_L12_PSORI_GUTTATE	11	88074718	0.162378	4.48627e-06	186	Genus_Paracoccus_Dorsalforearm_Dry_PopGen || id:GCST90133238-1	2	TRUE	0.107311	22.1189
rs73136542	G	A	G	A	-0.941252	-0.0681514	0.932796	0.960878	FALSE	FALSE	FALSE	2	8650680	0.184429	397953	0.711736	Guttate psoriasis || id:finngen_R10_L12_PSORI_GUTTATE	2	8790810	0.200807	5.3729e-06	186	Genus_Paracoccus_Dorsalforearm_Dry_PopGen || id:GCST90133238-1	2	TRUE	0.105645	21.735
rs76013506	A	G	A	G	-0.686727	0.218695	0.841398	0.907448	FALSE	FALSE	FALSE	11	63691726	0.124646	397953	0.0793396	Guttate psoriasis || id:finngen_R10_L12_PSORI_GUTTATE	11	63459198	0.132916	6.16525e-07	186	Genus_Paracoccus_Dorsalforearm_Dry_PopGen || id:GCST90133238-1	2	TRUE	0.125505	26.407
rs10801363	T	A	T	A	0.504419	-0.0338481	0.610215	0.667387	FALSE	TRUE	FALSE	1	194953077	0.0760592	397953	0.656304	Guttate psoriasis || id:finngen_R10_L12_PSORI_GUTTATE	1	194922207	0.107522	5.28038e-06	186	Genus_Paracoccus_Volarforearm_Dry_PopGen || id:GCST90133238-2	2	TRUE	0.105806	21.7719
rs10986020	A	G	A	G	-0.931344	-0.0909304	0.922043	0.9202	FALSE	FALSE	FALSE	9	123449487	0.13196	397953	0.490777	Guttate psoriasis || id:finngen_R10_L12_PSORI_GUTTATE	9	126211766	0.18546	1.20445e-06	186	Genus_Paracoccus_Volarforearm_Dry_PopGen || id:GCST90133238-2	2	TRUE	0.119395	24.9473
rs12456652	A	C	A	C	-0.598046	-0.151314	0.846774	0.845815	FALSE	FALSE	FALSE	18	55582819	0.100311	397953	0.131442	Guttate psoriasis || id:finngen_R10_L12_PSORI_GUTTATE	18	53250050	0.128972	6.68635e-06	186	Genus_Paracoccus_Volarforearm_Dry_PopGen || id:GCST90133238-2	2	TRUE	0.103623	21.2707
rs12583353	A	G	A	G	-0.941265	0.137684	0.88172	0.851355	FALSE	FALSE	FALSE	13	37493438	0.102628	397953	0.179731	Guttate psoriasis || id:finngen_R10_L12_PSORI_GUTTATE	13	38067575	0.143708	5.59157e-10	186	Genus_Paracoccus_Volarforearm_Dry_PopGen || id:GCST90133238-2	2	TRUE	0.187419	42.4391
rs12781740	C	T	C	T	-0.633722	0.145689	0.86828	0.808562	FALSE	FALSE	FALSE	10	62618207	0.0917798	397953	0.112428	Guttate psoriasis || id:finngen_R10_L12_PSORI_GUTTATE	10	64377967	0.136338	6.37069e-06	186	Genus_Paracoccus_Volarforearm_Dry_PopGen || id:GCST90133238-2	2	TRUE	0.10407	21.3733
rs45546031	C	T	C	T	-0.591108	-0.207398	0.827957	0.851348	FALSE	FALSE	FALSE	10	95290798	0.101068	397953	0.0401624	Guttate psoriasis || id:finngen_R10_L12_PSORI_GUTTATE	10	97050555	0.120885	2.19153e-06	186	Genus_Paracoccus_Volarforearm_Dry_PopGen || id:GCST90133238-2	2	TRUE	0.113909	23.6535
rs72752881	G	A	G	A	-0.736345	-0.164547	0.876344	0.853393	FALSE	FALSE	FALSE	1	240602074	0.102207	397953	0.107409	Guttate psoriasis || id:finngen_R10_L12_PSORI_GUTTATE	1	240765374	0.147783	1.44042e-06	186	Genus_Paracoccus_Volarforearm_Dry_PopGen || id:GCST90133238-2	2	TRUE	0.117758	24.5595
rs7512985	G	A	G	A	0.487232	-0.00535474	0.577957	0.614369	FALSE	FALSE	FALSE	1	181711957	0.0740986	397953	0.942391	Guttate psoriasis || id:finngen_R10_L12_PSORI_GUTTATE	1	181681093	0.100211	2.48242e-06	186	Genus_Paracoccus_Volarforearm_Dry_PopGen || id:GCST90133238-2	2	TRUE	0.112763	23.3855
rs7611260	C	T	C	T	-0.43698	-0.00750648	0.620968	0.633884	FALSE	FALSE	FALSE	3	32983618	0.0750927	397953	0.920374	Guttate psoriasis || id:finngen_R10_L12_PSORI_GUTTATE	3	33025110	0.0955748	8.8422e-06	186	Genus_Paracoccus_Volarforearm_Dry_PopGen || id:GCST90133238-2	2	TRUE	0.101034	20.6796
rs77095324	G	A	G	A	-0.571266	0.0495242	0.795699	0.760955	FALSE	FALSE	FALSE	5	35446361	0.0846565	397953	0.558546	Guttate psoriasis || id:finngen_R10_L12_PSORI_GUTTATE	5	35446463	0.125099	9.05725e-06	186	Genus_Paracoccus_Volarforearm_Dry_PopGen || id:GCST90133238-2	2	TRUE	0.100811	20.6288
rs78808473	G	C	G	C	-0.764027	-0.0672954	0.895161	0.92744	FALSE	TRUE	FALSE	8	100618774	0.13877	397953	0.627717	Guttate psoriasis || id:finngen_R10_L12_PSORI_GUTTATE	8	101631002	0.166995	8.72852e-06	186	Genus_Paracoccus_Volarforearm_Dry_PopGen || id:GCST90133238-2	2	TRUE	0.101154	20.7069
rs7976781	C	T	C	T	-0.589291	-0.00857435	0.830645	0.77956	FALSE	FALSE	FALSE	12	104461852	0.0875866	397953	0.922015	Guttate psoriasis || id:finngen_R10_L12_PSORI_GUTTATE	12	104855630	0.126306	5.90718e-06	186	Genus_Paracoccus_Volarforearm_Dry_PopGen || id:GCST90133238-2	2	TRUE	0.104769	21.5336
rs10118880	A	G	A	G	-0.436452	-0.0686059	0.667442	0.724139	FALSE	FALSE	FALSE	9	21559962	0.0808913	397953	0.396368	Guttate psoriasis || id:finngen_R10_L12_PSORI_GUTTATE	9	21559961	0.0947295	7.01819e-06	215	Genus_Finegoldia_Dorsalforearm_Dry_PopGen || id:GCST90133239-1	2	TRUE	0.0898612	21.0302
rs10226357	G	A	G	A	0.497015	0.139082	0.590698	0.684468	FALSE	FALSE	FALSE	7	886312	0.0775647	397953	0.0729541	Guttate psoriasis || id:finngen_R10_L12_PSORI_GUTTATE	7	925949	0.102672	2.48231e-06	215	Genus_Finegoldia_Dorsalforearm_Dry_PopGen || id:GCST90133239-1	2	TRUE	0.0982809	23.2155
rs11940551	T	G	T	G	0.724761	-0.0751448	0.911628	0.883875	FALSE	FALSE	FALSE	4	27160856	0.11217	397953	0.502907	Guttate psoriasis || id:finngen_R10_L12_PSORI_GUTTATE	4	27162478	0.152079	3.48262e-06	215	Genus_Finegoldia_Dorsalforearm_Dry_PopGen || id:GCST90133239-1	2	TRUE	0.0955431	22.5004
rs1320110	G	C	G	C	-0.482034	0.0363702	0.7	0.621656	FALSE	TRUE	FALSE	2	102935850	0.0744244	397953	0.625063	Guttate psoriasis || id:finngen_R10_L12_PSORI_GUTTATE	2	103552308	0.0970888	1.40724e-06	215	Genus_Finegoldia_Dorsalforearm_Dry_PopGen || id:GCST90133239-1	2	TRUE	0.102858	24.4207
rs4813706	A	G	A	G	-0.961994	0.143675	0.94186	0.883412	FALSE	FALSE	FALSE	20	4628351	0.112887	397953	0.203112	Guttate psoriasis || id:finngen_R10_L12_PSORI_GUTTATE	20	4608997	0.20289	3.88118e-06	215	Genus_Finegoldia_Dorsalforearm_Dry_PopGen || id:GCST90133239-1	2	TRUE	0.0946658	22.2722
rs9355457	A	G	A	G	-0.610404	-0.200357	0.774419	0.776207	FALSE	FALSE	FALSE	6	164036224	0.0861919	397953	0.020096	Guttate psoriasis || id:finngen_R10_L12_PSORI_GUTTATE	6	164457256	0.111196	1.14098e-07	215	Genus_Finegoldia_Dorsalforearm_Dry_PopGen || id:GCST90133239-1	2	TRUE	0.122928	29.8534
rs10248630	G	T	G	T	0.453572	-0.00854165	0.567757	0.577021	FALSE	FALSE	FALSE	7	67650451	0.072816	397953	0.906619	Guttate psoriasis || id:finngen_R10_L12_PSORI_GUTTATE	7	67115438	0.0945887	3.05863e-06	214	Genus_Finegoldia_Volarforearm_Dry_PopGen || id:GCST90133239-2	2	TRUE	0.0970235	22.7791
rs12132293	T	C	T	C	-0.763481	-0.258519	0.913551	0.90589	FALSE	FALSE	FALSE	1	92417920	0.122877	397953	0.0353883	Guttate psoriasis || id:finngen_R10_L12_PSORI_GUTTATE	1	92883477	0.167317	8.53023e-06	214	Genus_Finegoldia_Volarforearm_Dry_PopGen || id:GCST90133239-2	2	TRUE	0.0886704	20.6271
rs12215511	C	A	C	A	-0.558268	0.00166927	0.808411	0.785517	FALSE	FALSE	FALSE	6	4878338	0.0876724	397953	0.984809	Guttate psoriasis || id:finngen_R10_L12_PSORI_GUTTATE	6	4878572	0.120612	6.40967e-06	214	Genus_Finegoldia_Volarforearm_Dry_PopGen || id:GCST90133239-2	2	TRUE	0.0910026	21.224
rs1223678	C	T	C	T	0.576003	0.174336	0.827103	0.766148	FALSE	FALSE	FALSE	1	214220281	0.0850965	397953	0.040493	Guttate psoriasis || id:finngen_R10_L12_PSORI_GUTTATE	1	214393624	0.120397	3.21393e-06	214	Genus_Finegoldia_Volarforearm_Dry_PopGen || id:GCST90133239-2	2	TRUE	0.0966212	22.6745
rs16890598	C	T	C	T	-0.609106	-0.0762421	0.813084	0.833297	FALSE	FALSE	FALSE	4	14510088	0.0966124	397953	0.430022	Guttate psoriasis || id:finngen_R10_L12_PSORI_GUTTATE	4	14511712	0.124516	1.97416e-06	214	Genus_Finegoldia_Volarforearm_Dry_PopGen || id:GCST90133239-2	2	TRUE	0.100575	23.7061
rs413840	G	T	G	T	-0.760262	0.196954	0.906542	0.919841	FALSE	FALSE	FALSE	7	108143167	0.132332	397953	0.136665	Guttate psoriasis || id:finngen_R10_L12_PSORI_GUTTATE	7	107783612	0.162197	4.95044e-06	214	Genus_Finegoldia_Volarforearm_Dry_PopGen || id:GCST90133239-2	2	TRUE	0.0931076	21.7653
rs58997504	G	T	G	T	-0.914028	-0.0648917	0.936916	0.911685	FALSE	FALSE	FALSE	2	212667523	0.127431	397953	0.610592	Guttate psoriasis || id:finngen_R10_L12_PSORI_GUTTATE	2	213532247	0.196325	5.69154e-06	214	Genus_Finegoldia_Volarforearm_Dry_PopGen || id:GCST90133239-2	2	TRUE	0.0919712	21.4728
rs6020156	C	G	C	G	-0.754534	-0.29806	0.89486	0.900333	FALSE	TRUE	FALSE	20	49971096	0.107462	397953	0.00554358	Guttate psoriasis || id:finngen_R10_L12_PSORI_GUTTATE	20	48587633	0.142609	3.02699e-07	214	Genus_Finegoldia_Volarforearm_Dry_PopGen || id:GCST90133239-2	2	TRUE	0.11568	27.7322
rs932047	G	T	G	T	-0.606661	-0.142146	0.864486	0.806333	FALSE	FALSE	FALSE	15	76957675	0.0912481	397953	0.119281	Guttate psoriasis || id:finngen_R10_L12_PSORI_GUTTATE	15	77250016	0.129345	4.8861e-06	214	Genus_Finegoldia_Volarforearm_Dry_PopGen || id:GCST90133239-2	2	TRUE	0.0932141	21.7928
rs112247259	C	T	C	T	0.510929	0.00748284	0.76	0.871225	FALSE	FALSE	FALSE	6	146781301	0.107247	397953	0.944375	Guttate psoriasis || id:finngen_R10_L12_PSORI_GUTTATE	6	147102437	0.111899	8.72325e-06	200	Genus_Rothia_Dorsalforearm_Dry_PopGen || id:GCST90133240-1	2	TRUE	0.0944004	20.6397
rs2386584	T	G	T	G	0.462372	0.0484893	0.5725	0.585568	FALSE	FALSE	FALSE	15	90996342	0.0728757	397953	0.505814	Guttate psoriasis || id:finngen_R10_L12_PSORI_GUTTATE	15	91539572	0.100648	7.72922e-06	200	Genus_Rothia_Dorsalforearm_Dry_PopGen || id:GCST90133240-1	2	TRUE	0.0954506	20.8935
rs2722313	G	A	G	A	-0.861561	-0.112479	0.9275	0.84371	FALSE	FALSE	FALSE	7	37862887	0.0997013	397953	0.259251	Guttate psoriasis || id:finngen_R10_L12_PSORI_GUTTATE	7	37902489	0.175551	1.92035e-06	200	Genus_Rothia_Dorsalforearm_Dry_PopGen || id:GCST90133240-1	2	TRUE	0.107485	23.8451
rs4000736	G	A	G	A	-0.46031	0.0462137	0.7	0.638547	FALSE	FALSE	FALSE	1	92501859	0.074983	397953	0.537681	Guttate psoriasis || id:finngen_R10_L12_PSORI_GUTTATE	1	92967416	0.101197	9.39857e-06	200	Genus_Rothia_Dorsalforearm_Dry_PopGen || id:GCST90133240-1	2	TRUE	0.0937527	20.4834
rs4654254	A	G	A	G	-0.508742	0.00270571	0.7475	0.785678	FALSE	FALSE	FALSE	1	246446974	0.0879924	397953	0.97547	Guttate psoriasis || id:finngen_R10_L12_PSORI_GUTTATE	1	246610276	0.111885	9.46593e-06	200	Genus_Rothia_Dorsalforearm_Dry_PopGen || id:GCST90133240-1	2	TRUE	0.0936907	20.4685
rs56839549	A	G	A	G	-0.658742	-0.0487244	0.905	0.879021	FALSE	FALSE	FALSE	14	50812717	0.110398	397953	0.658957	Guttate psoriasis || id:finngen_R10_L12_PSORI_GUTTATE	14	51279435	0.145174	9.85538e-06	200	Genus_Rothia_Dorsalforearm_Dry_PopGen || id:GCST90133240-1	2	TRUE	0.0933403	20.384
rs6027553	T	C	T	C	-0.465516	0.0110883	0.6725	0.645265	FALSE	FALSE	FALSE	20	60368123	0.0752635	397953	0.882875	Guttate psoriasis || id:finngen_R10_L12_PSORI_GUTTATE	20	58943181	0.0967552	2.96738e-06	200	Genus_Rothia_Dorsalforearm_Dry_PopGen || id:GCST90133240-1	2	TRUE	0.103735	22.9169
rs9514997	A	G	A	G	0.583054	-0.0283246	0.835	0.822587	FALSE	FALSE	FALSE	13	109159163	0.0937702	397953	0.762604	Guttate psoriasis || id:finngen_R10_L12_PSORI_GUTTATE	13	109811511	0.126443	7.17268e-06	200	Genus_Rothia_Dorsalforearm_Dry_PopGen || id:GCST90133240-1	2	TRUE	0.096099	21.0505
rs9901397	G	A	G	A	-0.46618	0.0569743	0.615	0.58046	FALSE	FALSE	FALSE	17	14565848	0.0728139	397953	0.433941	Guttate psoriasis || id:finngen_R10_L12_PSORI_GUTTATE	17	14469165	0.101432	7.66165e-06	200	Genus_Rothia_Dorsalforearm_Dry_PopGen || id:GCST90133240-1	2	TRUE	0.0955269	20.912
rs1209	T	G	T	G	0.482444	0.0599745	0.594241	0.686659	FALSE	FALSE	FALSE	8	118193795	0.0776538	397953	0.439917	Guttate psoriasis || id:finngen_R10_L12_PSORI_GUTTATE	8	119206034	0.092764	5.13255e-07	191	Genus_Rothia_Volarforearm_Dry_PopGen || id:GCST90133240-2	2	TRUE	0.124046	26.7647
rs12279795	A	G	A	G	0.525157	0.088866	0.730366	0.731056	FALSE	FALSE	FALSE	11	5985658	0.0812183	397953	0.273884	Guttate psoriasis || id:finngen_R10_L12_PSORI_GUTTATE	11	6006888	0.11347	6.83944e-06	191	Genus_Rothia_Volarforearm_Dry_PopGen || id:GCST90133240-2	2	TRUE	0.100838	21.1957
rs1369450	C	A	C	A	0.535759	0.111265	0.531414	0.528871	FALSE	FALSE	FALSE	8	130880476	0.0720442	397953	0.122493	Guttate psoriasis || id:finngen_R10_L12_PSORI_GUTTATE	8	131892722	0.1008	2.98489e-07	191	Genus_Rothia_Volarforearm_Dry_PopGen || id:GCST90133240-2	2	TRUE	0.128849	27.9544
rs2031959	T	G	T	G	-0.564889	-0.0269102	0.790576	0.776315	FALSE	FALSE	FALSE	1	101246227	0.086461	397953	0.755617	Guttate psoriasis || id:finngen_R10_L12_PSORI_GUTTATE	1	101711783	0.117258	2.97445e-06	191	Genus_Rothia_Volarforearm_Dry_PopGen || id:GCST90133240-2	2	TRUE	0.108345	22.9653
rs6445168	C	T	C	T	0.53244	0.0241931	0.746073	0.708712	FALSE	FALSE	FALSE	3	174432514	0.0793615	397953	0.760484	Guttate psoriasis || id:finngen_R10_L12_PSORI_GUTTATE	3	174150304	0.106336	1.26152e-06	191	Genus_Rothia_Volarforearm_Dry_PopGen || id:GCST90133240-2	2	TRUE	0.116034	24.8092
rs12369866	T	G	T	G	-0.702076	0.163604	0.875	0.928137	FALSE	FALSE	FALSE	12	89970087	0.138903	397953	0.238865	Guttate psoriasis || id:finngen_R10_L12_PSORI_GUTTATE	12	90363864	0.139458	1.09158e-06	196	Genus_Kocuria_Dorsalforearm_Dry_PopGen || id:GCST90133241-1	2	TRUE	0.114501	25.0856
rs156472	T	G	T	G	0.498894	0.0551485	0.581633	0.516702	FALSE	FALSE	FALSE	5	8738175	0.0728099	397953	0.448792	Guttate psoriasis || id:finngen_R10_L12_PSORI_GUTTATE	5	8738287	0.10298	2.58997e-06	196	Genus_Kocuria_Dorsalforearm_Dry_PopGen || id:GCST90133241-1	2	TRUE	0.106938	23.2302
rs7649275	A	G	A	G	0.626393	0.0942169	0.864796	0.913652	FALSE	FALSE	FALSE	3	53724676	0.128528	397953	0.46353	Guttate psoriasis || id:finngen_R10_L12_PSORI_GUTTATE	3	53758703	0.134894	6.30175e-06	196	Genus_Kocuria_Dorsalforearm_Dry_PopGen || id:GCST90133241-1	2	TRUE	0.0991107	21.3428
rs10463984	G	A	G	A	-0.468649	-0.0385017	0.634831	0.671769	FALSE	FALSE	FALSE	5	102541428	0.0766271	397953	0.615347	Guttate psoriasis || id:finngen_R10_L12_PSORI_GUTTATE	5	101877132	0.102958	9.88845e-06	178	Genus_Kocuria_Volarforearm_Dry_PopGen || id:GCST90133241-2	2	TRUE	0.104265	20.4867
rs10513846	G	A	G	A	-0.683756	-0.168699	0.848315	0.799098	FALSE	FALSE	FALSE	3	190313200	0.0905386	397953	0.0624223	Guttate psoriasis || id:finngen_R10_L12_PSORI_GUTTATE	3	190030989	0.148938	8.37266e-06	178	Genus_Kocuria_Volarforearm_Dry_PopGen || id:GCST90133241-2	2	TRUE	0.10587	20.8394
rs12675846	G	A	G	A	-0.4841	0.0345543	0.662921	0.632082	FALSE	FALSE	FALSE	8	55934986	0.0749524	397953	0.644787	Guttate psoriasis || id:finngen_R10_L12_PSORI_GUTTATE	8	56847545	0.103934	6.28001e-06	178	Genus_Kocuria_Volarforearm_Dry_PopGen || id:GCST90133241-2	2	TRUE	0.10864	21.4511
rs140375257	A	G	A	G	-0.856462	0.255986	0.924157	0.924327	FALSE	FALSE	FALSE	11	37207808	0.136389	397953	0.0605355	Guttate psoriasis || id:finngen_R10_L12_PSORI_GUTTATE	11	37229358	0.188005	9.73526e-06	178	Genus_Kocuria_Volarforearm_Dry_PopGen || id:GCST90133241-2	2	TRUE	0.104416	20.5198
rs2577903	A	G	A	G	-0.690154	0.0426721	0.853933	0.824505	FALSE	FALSE	FALSE	8	64416956	0.0949596	397953	0.653164	Guttate psoriasis || id:finngen_R10_L12_PSORI_GUTTATE	8	65329513	0.138762	1.55305e-06	178	Genus_Kocuria_Volarforearm_Dry_PopGen || id:GCST90133241-2	2	TRUE	0.122016	24.4591
rs2939848	C	T	C	T	-0.566564	0.0668225	0.758427	0.752362	FALSE	FALSE	FALSE	15	90075849	0.083754	397953	0.424962	Guttate psoriasis || id:finngen_R10_L12_PSORI_GUTTATE	15	90619081	0.118042	3.37898e-06	178	Genus_Kocuria_Volarforearm_Dry_PopGen || id:GCST90133241-2	2	TRUE	0.114591	22.7781
rs9944797	C	T	C	T	-0.531691	-0.0466375	0.724719	0.687228	FALSE	FALSE	FALSE	18	14471770	0.0785294	397953	0.552589	Guttate psoriasis || id:finngen_R10_L12_PSORI_GUTTATE	18	14471769	0.115298	7.66689e-06	178	Genus_Kocuria_Volarforearm_Dry_PopGen || id:GCST90133241-2	2	TRUE	0.106719	21.0264
rs11619782	G	A	G	A	-0.762383	0.136789	0.792	0.780386	FALSE	FALSE	FALSE	13	43030022	0.0869516	397953	0.115682	Guttate psoriasis || id:finngen_R10_L12_PSORI_GUTTATE	13	43604158	0.152957	2.0606e-06	125	Genus_Bacteroides_Antecubitalfossa_Moist_KORAFF4 || id:GCST90133291-1	2	TRUE	0.165795	24.4457
rs169074	A	T	A	T	-0.638267	0.0536682	0.76	0.836412	FALSE	TRUE	FALSE	3	65874315	0.098016	397953	0.584004	Guttate psoriasis || id:finngen_R10_L12_PSORI_GUTTATE	3	65859990	0.129337	2.5466e-06	125	Genus_Bacteroides_Antecubitalfossa_Moist_KORAFF4 || id:GCST90133291-1	2	TRUE	0.163058	23.9637
rs17032739	C	T	C	T	-0.858281	0.25116	0.884615	0.926514	FALSE	FALSE	FALSE	2	106272925	0.138638	397953	0.0700438	Guttate psoriasis || id:finngen_R10_L12_PSORI_GUTTATE	2	106889381	0.185616	9.07854e-06	130	Genus_Bacteroides_Antecubitalfossa_Moist_KORAFF4 || id:GCST90133291-1	2	TRUE	0.14124	21.0521
rs60838429	T	A	T	A	-1.13696	-0.151725	0.937984	0.92194	FALSE	TRUE	FALSE	5	167926927	0.134409	397953	0.258971	Guttate psoriasis || id:finngen_R10_L12_PSORI_GUTTATE	5	167353932	0.24545	8.83279e-06	129	Genus_Bacteroides_Antecubitalfossa_Moist_KORAFF4 || id:GCST90133291-1	2	TRUE	0.14261	21.124
rs61025394	G	A	G	A	-0.696151	0.0954786	0.818548	0.73297	FALSE	FALSE	FALSE	6	7085584	0.0815198	397953	0.241505	Guttate psoriasis || id:finngen_R10_L12_PSORI_GUTTATE	6	7085817	0.149391	8.14172e-06	124	Genus_Bacteroides_Antecubitalfossa_Moist_KORAFF4 || id:GCST90133291-1	2	TRUE	0.149023	21.3647
rs6893166	G	T	G	T	1.07907	0.208298	0.922481	0.892451	FALSE	FALSE	FALSE	5	143897836	0.116421	397953	0.0735851	Guttate psoriasis || id:finngen_R10_L12_PSORI_GUTTATE	5	143277401	0.225438	4.63663e-06	129	Genus_Bacteroides_Antecubitalfossa_Moist_KORAFF4 || id:GCST90133291-1	2	TRUE	0.150818	22.5557
rs737269	C	T	C	T	-0.759803	-0.0842534	0.832	0.824605	FALSE	FALSE	FALSE	20	57047150	0.0948682	397953	0.374481	Guttate psoriasis || id:finngen_R10_L12_PSORI_GUTTATE	20	55622206	0.15672	3.68269e-06	125	Genus_Bacteroides_Antecubitalfossa_Moist_KORAFF4 || id:GCST90133291-1	2	TRUE	0.158275	23.1285
rs11067674	G	T	G	T	-1.13928	0.148869	0.952096	0.873545	FALSE	FALSE	FALSE	12	115605763	0.108311	397953	0.1693	Guttate psoriasis || id:finngen_R10_L12_PSORI_GUTTATE	12	116043568	0.246003	7.33666e-06	167	Genus_Bacteroides_Antecubitalfossa_Moist_PopGen || id:GCST90133291-2	2	TRUE	0.113812	21.1907
rs12195413	G	A	G	A	-0.839351	0.0158711	0.91018	0.914407	FALSE	FALSE	FALSE	6	148225929	0.128953	397953	0.902047	Guttate psoriasis || id:finngen_R10_L12_PSORI_GUTTATE	6	148547065	0.181404	7.46868e-06	167	Genus_Bacteroides_Antecubitalfossa_Moist_PopGen || id:GCST90133291-2	2	TRUE	0.11363	21.1525
rs472420	A	G	A	G	-0.76092	0.0209078	0.853293	0.887556	FALSE	FALSE	FALSE	11	130216443	0.113861	397953	0.854308	Guttate psoriasis || id:finngen_R10_L12_PSORI_GUTTATE	11	130086338	0.153312	1.71473e-06	167	Genus_Bacteroides_Antecubitalfossa_Moist_PopGen || id:GCST90133291-2	2	TRUE	0.128545	24.3385
rs73053986	T	G	T	G	-0.572457	0.0138244	0.658683	0.613636	FALSE	FALSE	FALSE	19	55748084	0.0737904	397953	0.851388	Guttate psoriasis || id:finngen_R10_L12_PSORI_GUTTATE	19	56259450	0.106539	2.59914e-07	167	Genus_Bacteroides_Antecubitalfossa_Moist_PopGen || id:GCST90133291-2	2	TRUE	0.1474	28.5256
rs74499983	C	G	C	G	-1.0168	0.146711	0.946108	0.939346	FALSE	TRUE	FALSE	13	28959401	0.150666	397953	0.33018	Guttate psoriasis || id:finngen_R10_L12_PSORI_GUTTATE	13	29533538	0.220258	7.8132e-06	167	Genus_Bacteroides_Antecubitalfossa_Moist_PopGen || id:GCST90133291-2	2	TRUE	0.11317	21.056
rs10887261	C	T	C	T	0.594577	-0.0650788	0.892405	0.874846	FALSE	FALSE	FALSE	10	84244513	0.109143	397953	0.550994	Guttate psoriasis || id:finngen_R10_L12_PSORI_GUTTATE	10	86004269	0.130854	7.89023e-06	316	Genus_Staphylococcus_Antecubitalfossa_Moist_KORAFF4 || id:GCST90133293-1	2	TRUE	0.0613295	20.5157
rs113987257	A	G	A	G	0.660019	-0.0859474	0.916388	0.925267	FALSE	FALSE	FALSE	9	26350000	0.138631	397953	0.535275	Guttate psoriasis || id:finngen_R10_L12_PSORI_GUTTATE	9	26349998	0.142847	5.71368e-06	299	Genus_Staphylococcus_Antecubitalfossa_Moist_KORAFF4 || id:GCST90133293-1	2	TRUE	0.066642	21.2059
rs11779071	G	C	G	C	-0.471313	-0.0111356	0.79288	0.771599	FALSE	TRUE	FALSE	8	22944485	0.0863651	397953	0.897408	Guttate psoriasis || id:finngen_R10_L12_PSORI_GUTTATE	8	22801998	0.096768	1.78518e-06	309	Genus_Staphylococcus_Antecubitalfossa_Moist_KORAFF4 || id:GCST90133293-1	2	TRUE	0.0712974	23.5687
rs12045182	G	A	G	A	0.374236	-0.079257	0.539432	0.534599	FALSE	FALSE	FALSE	1	232406101	0.0719995	397953	0.270984	Guttate psoriasis || id:finngen_R10_L12_PSORI_GUTTATE	1	232541847	0.0824742	8.1025e-06	317	Genus_Staphylococcus_Antecubitalfossa_Moist_KORAFF4 || id:GCST90133293-1	2	TRUE	0.0609911	20.4601
rs12290684	G	C	G	C	0.685045	-0.00993604	0.929022	0.95862	FALSE	TRUE	FALSE	11	86628032	0.180043	397953	0.955989	Guttate psoriasis || id:finngen_R10_L12_PSORI_GUTTATE	11	86339074	0.145236	3.60616e-06	317	Genus_Staphylococcus_Antecubitalfossa_Moist_KORAFF4 || id:GCST90133293-1	2	TRUE	0.0655803	22.1076
rs2494995	A	C	A	C	0.559152	0.216633	0.830097	0.818297	FALSE	FALSE	FALSE	1	43556632	0.0928627	397953	0.0196567	Guttate psoriasis || id:finngen_R10_L12_PSORI_GUTTATE	1	44022303	0.103939	1.48264e-07	309	Genus_Staphylococcus_Antecubitalfossa_Moist_KORAFF4 || id:GCST90133293-1	2	TRUE	0.0856381	28.7533
rs643246	T	C	T	C	0.363698	0.0647625	0.5347	0.521955	FALSE	FALSE	FALSE	6	56399929	0.0722189	397953	0.369851	Guttate psoriasis || id:finngen_R10_L12_PSORI_GUTTATE	6	56264727	0.0803639	8.54525e-06	317	Genus_Staphylococcus_Antecubitalfossa_Moist_KORAFF4 || id:GCST90133293-1	2	TRUE	0.0606891	20.3522
rs7255003	T	C	T	C	-0.533437	-0.0983249	0.853312	0.873417	FALSE	FALSE	FALSE	19	51874382	0.107409	397953	0.359968	Guttate psoriasis || id:finngen_R10_L12_PSORI_GUTTATE	19	52377635	0.112977	3.52635e-06	317	Genus_Staphylococcus_Antecubitalfossa_Moist_KORAFF4 || id:GCST90133293-1	2	TRUE	0.0657071	22.1534
rs10978947	G	A	G	A	0.696334	-0.031069	0.916667	0.905396	FALSE	FALSE	FALSE	9	107624453	0.123665	397953	0.801633	Guttate psoriasis || id:finngen_R10_L12_PSORI_GUTTATE	9	110386734	0.145654	2.94852e-06	258	Genus_Staphylococcus_Antecubitalfossa_Moist_PopGen || id:GCST90133293-2	2	TRUE	0.0813782	22.6783
rs12655553	A	G	A	G	0.474331	0.0536251	0.753876	0.775588	FALSE	FALSE	FALSE	5	169209636	0.0860027	397953	0.532937	Guttate psoriasis || id:finngen_R10_L12_PSORI_GUTTATE	5	168636640	0.102805	6.2524e-06	258	Genus_Staphylococcus_Antecubitalfossa_Moist_PopGen || id:GCST90133293-2	2	TRUE	0.076222	21.1229
rs1810081	A	C	A	C	-0.471502	-0.00387513	0.790698	0.788822	FALSE	FALSE	FALSE	5	175568762	0.0889564	397953	0.965254	Guttate psoriasis || id:finngen_R10_L12_PSORI_GUTTATE	5	174995765	0.103936	8.80033e-06	258	Genus_Staphylococcus_Antecubitalfossa_Moist_PopGen || id:GCST90133293-2	2	TRUE	0.0738724	20.4198
rs1929699	T	C	T	C	-0.381115	-0.0168187	0.525194	0.581839	FALSE	FALSE	FALSE	10	120196028	0.0730981	397953	0.818026	Guttate psoriasis || id:finngen_R10_L12_PSORI_GUTTATE	10	121955540	0.0841813	9.15984e-06	258	Genus_Staphylococcus_Antecubitalfossa_Moist_PopGen || id:GCST90133293-2	2	TRUE	0.073597	20.3376
rs6772042	C	T	C	T	-0.506346	-0.119896	0.765504	0.747716	FALSE	FALSE	FALSE	3	71372001	0.0829144	397953	0.14817	Guttate psoriasis || id:finngen_R10_L12_PSORI_GUTTATE	3	71421152	0.0964791	3.22491e-07	258	Genus_Staphylococcus_Antecubitalfossa_Moist_PopGen || id:GCST90133293-2	2	TRUE	0.0964619	27.3306
rs72836640	T	C	T	C	0.567903	-0.00316587	0.885659	0.869179	FALSE	FALSE	FALSE	17	40216894	0.107095	397953	0.976417	Guttate psoriasis || id:finngen_R10_L12_PSORI_GUTTATE	17	38373146	0.125548	9.31836e-06	258	Genus_Staphylococcus_Antecubitalfossa_Moist_PopGen || id:GCST90133293-2	2	TRUE	0.073479	20.3024
rs74383656	G	A	G	A	0.759705	0.149049	0.916667	0.915842	FALSE	FALSE	FALSE	4	123534463	0.128945	397953	0.247718	Guttate psoriasis || id:finngen_R10_L12_PSORI_GUTTATE	4	124455618	0.161288	4.06103e-06	258	Genus_Staphylococcus_Antecubitalfossa_Moist_PopGen || id:GCST90133293-2	2	TRUE	0.079184	22.0143
rs78761638	G	A	G	A	0.700039	-0.0249573	0.908915	0.909359	FALSE	FALSE	FALSE	1	91440545	0.125482	397953	0.842348	Guttate psoriasis || id:finngen_R10_L12_PSORI_GUTTATE	1	91906102	0.141063	1.26996e-06	258	Genus_Staphylococcus_Antecubitalfossa_Moist_PopGen || id:GCST90133293-2	2	TRUE	0.0871375	24.4365
rs11025448	C	A	C	A	0.608709	-0.0242628	0.890288	0.927393	FALSE	FALSE	FALSE	11	20224723	0.139726	397953	0.862144	Guttate psoriasis || id:finngen_R10_L12_PSORI_GUTTATE	11	20246269	0.1327	6.82481e-06	278	Genus_Corynebacterium_Antecubitalfossa_Moist_KORAFF4 || id:GCST90133301-1	2	TRUE	0.0703638	20.8903
rs13134842	G	A	G	A	0.366546	-0.036388	0.542763	0.437213	FALSE	FALSE	FALSE	4	100600542	0.072717	397953	0.61679	Guttate psoriasis || id:finngen_R10_L12_PSORI_GUTTATE	4	101521699	0.079958	6.67996e-06	304	Genus_Corynebacterium_Antecubitalfossa_Moist_KORAFF4 || id:GCST90133301-1	2	TRUE	0.0646589	20.8769
rs17091053	A	G	A	G	-0.778757	0.340395	0.944079	0.943243	FALSE	FALSE	FALSE	14	56127553	0.155882	397953	0.0289868	Guttate psoriasis || id:finngen_R10_L12_PSORI_GUTTATE	14	56594271	0.170154	6.90571e-06	304	Genus_Corynebacterium_Antecubitalfossa_Moist_KORAFF4 || id:GCST90133301-1	2	TRUE	0.0644629	20.8092
rs306635	T	G	T	G	-0.655388	0.0740862	0.90429	0.942377	FALSE	FALSE	FALSE	12	27467135	0.153899	397953	0.630234	Guttate psoriasis || id:finngen_R10_L12_PSORI_GUTTATE	12	27620068	0.13219	1.1921e-06	303	Genus_Corynebacterium_Antecubitalfossa_Moist_KORAFF4 || id:GCST90133301-1	2	TRUE	0.0750382	24.4188
rs35994782	G	T	G	T	-0.551439	0.0140511	0.871237	0.797899	FALSE	FALSE	FALSE	3	107011760	0.0904327	397953	0.876524	Guttate psoriasis || id:finngen_R10_L12_PSORI_GUTTATE	3	106730607	0.121388	8.08289e-06	299	Genus_Corynebacterium_Antecubitalfossa_Moist_KORAFF4 || id:GCST90133301-1	2	TRUE	0.0645637	20.4989
rs7412359	G	A	G	A	-0.542931	0.04435	0.887789	0.907902	FALSE	FALSE	FALSE	1	196863795	0.125279	397953	0.723331	Guttate psoriasis || id:finngen_R10_L12_PSORI_GUTTATE	1	196832925	0.11833	6.56848e-06	303	Genus_Corynebacterium_Antecubitalfossa_Moist_KORAFF4 || id:GCST90133301-1	2	TRUE	0.0649652	20.9132
rs12455100	C	A	C	A	0.596853	0.192664	0.860465	0.811843	FALSE	FALSE	FALSE	18	67189995	0.0930087	397953	0.038316	Guttate psoriasis || id:finngen_R10_L12_PSORI_GUTTATE	18	64857232	0.124357	2.70599e-06	258	Genus_Corynebacterium_Antecubitalfossa_Moist_PopGen || id:GCST90133301-2	2	TRUE	0.081966	22.8568
rs13195974	G	A	G	A	0.410285	-0.126836	0.589147	0.636063	FALSE	FALSE	FALSE	6	148313647	0.074917	397953	0.0904503	Guttate psoriasis || id:finngen_R10_L12_PSORI_GUTTATE	6	148634783	0.0858464	2.96818e-06	258	Genus_Corynebacterium_Antecubitalfossa_Moist_PopGen || id:GCST90133301-2	2	TRUE	0.0813327	22.6645
rs1548770	T	C	T	C	0.958658	0.18876	0.947674	0.929059	FALSE	FALSE	FALSE	14	74219855	0.142028	397953	0.183837	Guttate psoriasis || id:finngen_R10_L12_PSORI_GUTTATE	14	74686558	0.187056	5.86755e-07	258	Genus_Corynebacterium_Antecubitalfossa_Moist_PopGen || id:GCST90133301-2	2	TRUE	0.0923977	26.0619
rs1873242	T	C	T	C	0.434022	0.0275836	0.507752	0.579593	FALSE	FALSE	FALSE	12	25368258	0.0729909	397953	0.705502	Guttate psoriasis || id:finngen_R10_L12_PSORI_GUTTATE	12	25521192	0.0884664	1.65433e-06	258	Genus_Corynebacterium_Antecubitalfossa_Moist_PopGen || id:GCST90133301-2	2	TRUE	0.0853318	23.8829
rs331602	C	T	C	T	0.489922	0.0630513	0.777132	0.804096	FALSE	FALSE	FALSE	13	110555308	0.0910402	397953	0.488583	Guttate psoriasis || id:finngen_R10_L12_PSORI_GUTTATE	13	111207655	0.100347	1.84788e-06	258	Genus_Corynebacterium_Antecubitalfossa_Moist_PopGen || id:GCST90133301-2	2	TRUE	0.0845757	23.6517
rs3861473	T	C	T	C	0.422367	-0.0407537	0.686047	0.692463	FALSE	FALSE	FALSE	14	33305520	0.0777535	397953	0.600181	Guttate psoriasis || id:finngen_R10_L12_PSORI_GUTTATE	14	33774726	0.091087	5.6419e-06	258	Genus_Corynebacterium_Antecubitalfossa_Moist_PopGen || id:GCST90133301-2	2	TRUE	0.0769277	21.3347
rs4727933	T	C	T	C	-0.43541	0.109852	0.5	0.520451	FALSE	FALSE	FALSE	7	121523674	0.0720745	397953	0.127472	Guttate psoriasis || id:finngen_R10_L12_PSORI_GUTTATE	7	121163728	0.09097	2.87457e-06	258	Genus_Corynebacterium_Antecubitalfossa_Moist_PopGen || id:GCST90133301-2	2	TRUE	0.0815522	22.7311
rs62228538	T	C	T	C	-0.678688	0.0221914	0.897287	0.94753	FALSE	FALSE	FALSE	3	25064628	0.161073	397953	0.89042	Guttate psoriasis || id:finngen_R10_L12_PSORI_GUTTATE	3	25106119	0.145232	4.79901e-06	258	Genus_Corynebacterium_Antecubitalfossa_Moist_PopGen || id:GCST90133301-2	2	TRUE	0.0780385	21.6689
rs72877757	G	A	G	A	0.671747	-0.107341	0.885659	0.953093	FALSE	FALSE	FALSE	6	62547166	0.170658	397953	0.529359	Guttate psoriasis || id:finngen_R10_L12_PSORI_GUTTATE	6	63257071	0.136507	1.5433e-06	258	Genus_Corynebacterium_Antecubitalfossa_Moist_PopGen || id:GCST90133301-2	2	TRUE	0.0858064	24.0282
rs13184329	G	A	G	A	-0.586449	-0.129576	0.824895	0.825227	FALSE	FALSE	FALSE	5	58485148	0.0947374	397953	0.171393	Guttate psoriasis || id:finngen_R10_L12_PSORI_GUTTATE	5	57780975	0.116046	8.71517e-07	237	Genus_Enhydrobacter_Antecubitalfossa_Moist_KORAFF4 || id:GCST90133307-1	2	TRUE	0.0972761	25.3232
rs1380759	C	T	C	T	-0.411499	-0.0592531	0.649789	0.780309	FALSE	FALSE	FALSE	12	83756960	0.0867296	397953	0.494485	Guttate psoriasis || id:finngen_R10_L12_PSORI_GUTTATE	12	84150739	0.0890781	6.33909e-06	237	Genus_Enhydrobacter_Antecubitalfossa_Moist_KORAFF4 || id:GCST90133307-1	2	TRUE	0.0826046	21.16
rs2816456	A	G	A	G	0.417576	-0.0548563	0.607595	0.611548	FALSE	FALSE	FALSE	8	5991148	0.0739336	397953	0.458107	Guttate psoriasis || id:finngen_R10_L12_PSORI_GUTTATE	8	5848670	0.0914907	8.08751e-06	237	Genus_Enhydrobacter_Antecubitalfossa_Moist_KORAFF4 || id:GCST90133307-1	2	TRUE	0.0807943	20.6555
rs55979619	C	T	C	T	-0.570929	0.144951	0.846983	0.917287	FALSE	FALSE	FALSE	12	115939584	0.13093	397953	0.268256	Guttate psoriasis || id:finngen_R10_L12_PSORI_GUTTATE	12	116377389	0.12511	8.19222e-06	232	Genus_Enhydrobacter_Antecubitalfossa_Moist_KORAFF4 || id:GCST90133307-1	2	TRUE	0.082369	20.6454
rs6917797	A	G	A	G	-0.546826	0.0936006	0.824153	0.811094	FALSE	FALSE	FALSE	6	66482957	0.0916124	397953	0.306922	Guttate psoriasis || id:finngen_R10_L12_PSORI_GUTTATE	6	67192850	0.119158	7.26374e-06	236	Genus_Enhydrobacter_Antecubitalfossa_Moist_KORAFF4 || id:GCST90133307-1	2	TRUE	0.081925	20.8811
rs12447535	A	G	A	G	0.711953	0.0515201	0.896104	0.941851	FALSE	FALSE	FALSE	16	10584361	0.153982	397953	0.737938	Guttate psoriasis || id:finngen_R10_L12_PSORI_GUTTATE	16	10678218	0.148703	3.02733e-06	231	Genus_Enhydrobacter_Antecubitalfossa_Moist_PopGen || id:GCST90133307-2	2	TRUE	0.0902734	22.724
rs12788198	G	C	G	C	0.725248	0.0605964	0.885281	0.895673	FALSE	TRUE	FALSE	11	22548259	0.118513	397953	0.609138	Guttate psoriasis || id:finngen_R10_L12_PSORI_GUTTATE	11	22569805	0.139347	4.31825e-07	231	Genus_Enhydrobacter_Antecubitalfossa_Moist_PopGen || id:GCST90133307-2	2	TRUE	0.104956	26.8534
rs62140373	C	A	C	A	-0.6806	0.117049	0.91342	0.891006	FALSE	FALSE	FALSE	2	65022432	0.114979	397953	0.308676	Guttate psoriasis || id:finngen_R10_L12_PSORI_GUTTATE	2	65249566	0.147251	6.34759e-06	231	Genus_Enhydrobacter_Antecubitalfossa_Moist_PopGen || id:GCST90133307-2	2	TRUE	0.0846525	21.1782
rs7919007	A	G	A	G	-0.4708	-0.0863628	0.766234	0.763943	FALSE	FALSE	FALSE	10	23613094	0.084731	397953	0.30808	Guttate psoriasis || id:finngen_R10_L12_PSORI_GUTTATE	10	23902023	0.103402	8.58749e-06	231	Genus_Enhydrobacter_Antecubitalfossa_Moist_PopGen || id:GCST90133307-2	2	TRUE	0.0823526	20.5512
rs10806229	C	A	C	A	-0.51008	-0.0342613	0.73399	0.698959	FALSE	FALSE	FALSE	6	81637672	0.0783788	397953	0.662021	Guttate psoriasis || id:finngen_R10_L12_PSORI_GUTTATE	6	82347389	0.106469	3.22053e-06	203	Genus_Micrococcus_Antecubitalfossa_Moist_KORAFF4 || id:GCST90133308-1	2	TRUE	0.101581	22.7264
rs11158204	C	T	C	T	0.611385	-0.0247765	0.770619	0.674811	FALSE	FALSE	FALSE	14	58377808	0.0768201	397953	0.747054	Guttate psoriasis || id:finngen_R10_L12_PSORI_GUTTATE	14	58844526	0.120115	8.50301e-07	194	Genus_Micrococcus_Antecubitalfossa_Moist_KORAFF4 || id:GCST90133308-1	2	TRUE	0.117813	25.6409
rs12222311	C	T	C	T	-0.765777	-0.0434325	0.918719	0.907246	FALSE	FALSE	FALSE	11	80657217	0.123952	397953	0.726039	Guttate psoriasis || id:finngen_R10_L12_PSORI_GUTTATE	11	80368261	0.166256	7.27654e-06	203	Genus_Micrococcus_Antecubitalfossa_Moist_KORAFF4 || id:GCST90133308-1	2	TRUE	0.0946207	21.0064
rs17093700	A	G	A	G	-0.517765	-0.0290884	0.755	0.778673	FALSE	FALSE	FALSE	10	115876287	0.0866545	397953	0.737109	Guttate psoriasis || id:finngen_R10_L12_PSORI_GUTTATE	10	117635798	0.10895	3.85995e-06	200	Genus_Micrococcus_Antecubitalfossa_Moist_KORAFF4 || id:GCST90133308-1	2	TRUE	0.101464	22.3585
rs2055438	C	T	C	T	0.516538	0.050499	0.770936	0.699685	FALSE	FALSE	FALSE	5	82666969	0.0790577	397953	0.522979	Guttate psoriasis || id:finngen_R10_L12_PSORI_GUTTATE	5	81962788	0.113169	8.71796e-06	203	Genus_Micrococcus_Antecubitalfossa_Moist_KORAFF4 || id:GCST90133308-1	2	TRUE	0.093073	20.6275
rs35571573	C	T	C	T	-0.982347	0.0291408	0.945545	0.896324	FALSE	FALSE	FALSE	4	29034219	0.118837	397953	0.806289	Guttate psoriasis || id:finngen_R10_L12_PSORI_GUTTATE	4	29035841	0.198865	1.64814e-06	202	Genus_Micrococcus_Antecubitalfossa_Moist_KORAFF4 || id:GCST90133308-1	2	TRUE	0.10778	24.1598
rs492613	C	T	C	T	-0.789913	0.261851	0.926108	0.879877	FALSE	FALSE	FALSE	13	26238185	0.110165	397953	0.017459	Guttate psoriasis || id:finngen_R10_L12_PSORI_GUTTATE	13	26812322	0.172025	7.73779e-06	203	Genus_Micrococcus_Antecubitalfossa_Moist_KORAFF4 || id:GCST90133308-1	2	TRUE	0.0940945	20.8775
rs6493601	C	G	C	G	0.439218	0.0298826	0.590206	0.645363	FALSE	TRUE	FALSE	15	52962935	0.0751264	397953	0.690804	Guttate psoriasis || id:finngen_R10_L12_PSORI_GUTTATE	15	53255132	0.0967354	9.89598e-06	194	Genus_Micrococcus_Antecubitalfossa_Moist_KORAFF4 || id:GCST90133308-1	2	TRUE	0.096057	20.4028
rs6719161	T	C	T	C	0.479327	-0.0134998	0.619792	0.597153	FALSE	FALSE	FALSE	2	125635957	0.0733718	397953	0.85402	Guttate psoriasis || id:finngen_R10_L12_PSORI_GUTTATE	2	126393534	0.101653	4.66022e-06	192	Genus_Micrococcus_Antecubitalfossa_Moist_KORAFF4 || id:GCST90133308-1	2	TRUE	0.103786	22.0029
rs72784039	A	C	A	C	-0.624962	0.149318	0.828283	0.810301	FALSE	FALSE	FALSE	5	118956584	0.0919533	397953	0.104408	Guttate psoriasis || id:finngen_R10_L12_PSORI_GUTTATE	5	118292279	0.126251	1.59433e-06	198	Genus_Micrococcus_Antecubitalfossa_Moist_KORAFF4 || id:GCST90133308-1	2	TRUE	0.110128	24.2564
rs72784256	C	T	C	T	-0.602782	-0.120891	0.812834	0.833687	FALSE	FALSE	FALSE	10	24562839	0.0970581	397953	0.21293	Guttate psoriasis || id:finngen_R10_L12_PSORI_GUTTATE	10	24851768	0.125208	3.06129e-06	187	Genus_Micrococcus_Antecubitalfossa_Moist_KORAFF4 || id:GCST90133308-1	2	TRUE	0.110274	22.9292
rs7395655	T	C	T	C	-0.429342	-0.032378	0.5	0.561254	FALSE	FALSE	FALSE	11	18645519	0.0726987	397953	0.65605	Guttate psoriasis || id:finngen_R10_L12_PSORI_GUTTATE	11	18667066	0.0915335	5.0273e-06	203	Genus_Micrococcus_Antecubitalfossa_Moist_KORAFF4 || id:GCST90133308-1	2	TRUE	0.0977824	21.7844
rs77411065	T	C	T	C	-0.702937	0.048612	0.898515	0.881396	FALSE	FALSE	FALSE	16	11739661	0.110775	397953	0.66078	Guttate psoriasis || id:finngen_R10_L12_PSORI_GUTTATE	16	11833517	0.154833	9.70575e-06	202	Genus_Micrococcus_Antecubitalfossa_Moist_KORAFF4 || id:GCST90133308-1	2	TRUE	0.092589	20.4073
rs77649192	G	A	G	A	-0.832495	-0.265461	0.91206	0.887307	FALSE	FALSE	FALSE	6	827999	0.114555	397953	0.0204861	Guttate psoriasis || id:finngen_R10_L12_PSORI_GUTTATE	6	827999	0.16702	1.35791e-06	199	Genus_Micrococcus_Antecubitalfossa_Moist_KORAFF4 || id:GCST90133308-1	2	TRUE	0.110989	24.5946
rs860049	A	G	A	G	0.605354	0.0795715	0.841398	0.78935	FALSE	FALSE	FALSE	3	196664444	0.089011	397953	0.371348	Guttate psoriasis || id:finngen_R10_L12_PSORI_GUTTATE	3	196391315	0.130375	6.5102e-06	186	Genus_Micrococcus_Antecubitalfossa_Moist_KORAFF4 || id:GCST90133308-1	2	TRUE	0.10387	21.3273
rs11031254	T	C	T	C	-0.53653	0.0319288	0.686224	0.702625	FALSE	FALSE	FALSE	11	30971328	0.0786822	397953	0.684893	Guttate psoriasis || id:finngen_R10_L12_PSORI_GUTTATE	11	30992875	0.109241	1.91498e-06	196	Genus_Micrococcus_Antecubitalfossa_Moist_PopGen || id:GCST90133308-2	2	TRUE	0.109586	23.8763
rs112193157	G	A	G	A	-0.944418	-0.0267551	0.933673	0.937576	FALSE	FALSE	FALSE	18	50157167	0.148614	397953	0.857128	Guttate psoriasis || id:finngen_R10_L12_PSORI_GUTTATE	18	47683537	0.195265	2.68425e-06	196	Genus_Micrococcus_Antecubitalfossa_Moist_PopGen || id:GCST90133308-2	2	TRUE	0.106624	23.1539
rs12028060	C	T	C	T	-0.520398	-0.0594907	0.696429	0.762599	FALSE	FALSE	FALSE	1	241707708	0.0851716	397953	0.484876	Guttate psoriasis || id:finngen_R10_L12_PSORI_GUTTATE	1	241871010	0.110556	4.77188e-06	196	Genus_Micrococcus_Antecubitalfossa_Moist_PopGen || id:GCST90133308-2	2	TRUE	0.101563	21.9306
rs13025632	T	C	T	C	-0.569477	-0.122516	0.788265	0.820797	FALSE	FALSE	FALSE	2	233222032	0.0947763	397953	0.196121	Guttate psoriasis || id:finngen_R10_L12_PSORI_GUTTATE	2	234130678	0.122406	6.06463e-06	196	Genus_Micrococcus_Antecubitalfossa_Moist_PopGen || id:GCST90133308-2	2	TRUE	0.0994492	21.4237
rs2930631	C	T	C	T	-0.661722	-0.0866344	0.844388	0.85276	FALSE	FALSE	FALSE	15	25690474	0.10161	397953	0.393872	Guttate psoriasis || id:finngen_R10_L12_PSORI_GUTTATE	15	25935621	0.130412	9.08048e-07	196	Genus_Micrococcus_Antecubitalfossa_Moist_PopGen || id:GCST90133308-2	2	TRUE	0.116107	25.4836
rs7081286	C	T	C	T	-0.423937	0.0242833	0.563776	0.662406	FALSE	FALSE	FALSE	10	61871901	0.0763175	397953	0.750343	Guttate psoriasis || id:finngen_R10_L12_PSORI_GUTTATE	10	63631660	0.0923977	8.01339e-06	196	Genus_Micrococcus_Antecubitalfossa_Moist_PopGen || id:GCST90133308-2	2	TRUE	0.0969881	20.8366
rs75650848	T	C	T	C	-0.831696	-0.216067	0.913265	0.973791	FALSE	FALSE	FALSE	10	107704657	0.224196	397953	0.335176	Guttate psoriasis || id:finngen_R10_L12_PSORI_GUTTATE	10	109464415	0.16865	1.74837e-06	196	Genus_Micrococcus_Antecubitalfossa_Moist_PopGen || id:GCST90133308-2	2	TRUE	0.110384	24.0715
rs10908733	T	A	T	A	-0.636085	-0.0115914	0.895582	0.860937	FALSE	TRUE	FALSE	1	159534264	0.104405	397953	0.911598	Guttate psoriasis || id:finngen_R10_L12_PSORI_GUTTATE	1	159504054	0.140053	8.72745e-06	249	Genus_Streptococcus_Antecubitalfossa_Moist_KORAFF4 || id:GCST90133309-1	2	TRUE	0.0765036	20.4618
rs11119610	C	G	C	G	-0.404399	-0.0151597	0.623016	0.632721	FALSE	TRUE	FALSE	1	210824026	0.0748723	397953	0.839546	Guttate psoriasis || id:finngen_R10_L12_PSORI_GUTTATE	1	210997368	0.0855828	3.83824e-06	252	Genus_Streptococcus_Antecubitalfossa_Moist_KORAFF4 || id:GCST90133309-1	2	TRUE	0.081391	22.1506
rs11177899	T	G	T	G	0.49936	-0.0513402	0.804	0.883447	FALSE	FALSE	FALSE	12	69847593	0.112069	397953	0.646873	Guttate psoriasis || id:finngen_R10_L12_PSORI_GUTTATE	12	70241373	0.110577	9.75205e-06	250	Genus_Streptococcus_Antecubitalfossa_Moist_KORAFF4 || id:GCST90133309-1	2	TRUE	0.0754226	20.2307
rs116139915	T	C	T	C	-0.815592	-0.0112277	0.927419	0.870067	FALSE	FALSE	FALSE	9	4787922	0.106971	397953	0.916408	Guttate psoriasis || id:finngen_R10_L12_PSORI_GUTTATE	9	4787922	0.160324	7.21451e-07	248	Genus_Streptococcus_Antecubitalfossa_Moist_KORAFF4 || id:GCST90133309-1	2	TRUE	0.0944914	25.6705
rs1370396	C	A	C	A	0.431655	-0.0544116	0.719368	0.761697	FALSE	FALSE	FALSE	15	59832064	0.0846461	397953	0.520346	Guttate psoriasis || id:finngen_R10_L12_PSORI_GUTTATE	15	60124263	0.0926483	5.15706e-06	253	Genus_Streptococcus_Antecubitalfossa_Moist_KORAFF4 || id:GCST90133309-1	2	TRUE	0.0790187	21.5354
rs165614	A	C	A	C	-0.489596	-0.0931481	0.792181	0.802945	FALSE	FALSE	FALSE	22	20581386	0.0903083	397953	0.302332	Guttate psoriasis || id:finngen_R10_L12_PSORI_GUTTATE	22	20935673	0.106334	6.69993e-06	243	Genus_Streptococcus_Antecubitalfossa_Moist_KORAFF4 || id:GCST90133309-1	2	TRUE	0.0802423	21.0255
rs1952634	T	C	T	C	0.797111	0.226318	0.936759	0.938424	FALSE	FALSE	FALSE	9	24534501	0.15002	397953	0.131404	Guttate psoriasis || id:finngen_R10_L12_PSORI_GUTTATE	9	24534499	0.168803	3.88497e-06	253	Genus_Streptococcus_Antecubitalfossa_Moist_KORAFF4 || id:GCST90133309-1	2	TRUE	0.0809974	22.1222
rs2055943	C	A	C	A	-0.446849	0.118136	0.703187	0.804759	FALSE	FALSE	FALSE	4	46965262	0.0911272	397953	0.194842	Guttate psoriasis || id:finngen_R10_L12_PSORI_GUTTATE	4	46967279	0.0966155	6.02393e-06	251	Genus_Streptococcus_Antecubitalfossa_Moist_KORAFF4 || id:GCST90133309-1	2	TRUE	0.0785299	21.2204
rs2904413	G	A	G	A	-0.39296	0.115479	0.511858	0.48359	FALSE	FALSE	FALSE	15	79244098	0.0721388	397953	0.109423	Guttate psoriasis || id:finngen_R10_L12_PSORI_GUTTATE	15	79536440	0.0817426	2.63767e-06	253	Genus_Streptococcus_Antecubitalfossa_Moist_KORAFF4 || id:GCST90133309-1	2	TRUE	0.0836987	22.9274
rs71641023	A	C	A	C	-0.930854	0.0942084	0.933198	0.914144	FALSE	FALSE	FALSE	5	94689342	0.128716	397953	0.464224	Guttate psoriasis || id:finngen_R10_L12_PSORI_GUTTATE	5	94025047	0.164223	4.04246e-08	247	Genus_Streptococcus_Antecubitalfossa_Moist_KORAFF4 || id:GCST90133309-1	2	TRUE	0.115104	31.8686
rs11762959	A	G	A	G	0.472064	-0.00645427	0.531401	0.523222	FALSE	FALSE	FALSE	7	57301973	0.0720766	397953	0.928647	Guttate psoriasis || id:finngen_R10_L12_PSORI_GUTTATE	7	57369680	0.0928814	8.37308e-07	207	Genus_Streptococcus_Antecubitalfossa_Moist_PopGen || id:GCST90133309-2	2	TRUE	0.110944	25.5816
rs198196	A	G	A	G	-0.508445	-0.0711583	0.751208	0.807206	FALSE	FALSE	FALSE	16	24116422	0.0910277	397953	0.434378	Guttate psoriasis || id:finngen_R10_L12_PSORI_GUTTATE	16	24127743	0.105762	2.95421e-06	207	Genus_Streptococcus_Antecubitalfossa_Moist_PopGen || id:GCST90133309-2	2	TRUE	0.100436	22.8881
rs6597674	G	A	G	A	-0.503908	-0.0979409	0.743961	0.734926	FALSE	FALSE	FALSE	9	131062557	0.0817892	397953	0.23112	Guttate psoriasis || id:finngen_R10_L12_PSORI_GUTTATE	9	133937944	0.104441	2.73198e-06	207	Genus_Streptococcus_Antecubitalfossa_Moist_PopGen || id:GCST90133309-2	2	TRUE	0.10109	23.0539
rs7741846	G	A	G	A	-0.437819	-0.103408	0.60628	0.578622	FALSE	FALSE	FALSE	6	132614922	0.0729165	397953	0.156142	Guttate psoriasis || id:finngen_R10_L12_PSORI_GUTTATE	6	132936061	0.0905596	2.61415e-06	207	Genus_Streptococcus_Antecubitalfossa_Moist_PopGen || id:GCST90133309-2	2	TRUE	0.101459	23.1475
rs7777658	C	T	C	T	-0.862069	-0.206465	0.917874	0.917539	FALSE	FALSE	FALSE	7	19662932	0.131106	397953	0.115304	Guttate psoriasis || id:finngen_R10_L12_PSORI_GUTTATE	7	19702555	0.164306	3.84997e-07	207	Genus_Streptococcus_Antecubitalfossa_Moist_PopGen || id:GCST90133309-2	2	TRUE	0.117377	27.2623
rs9392171	C	T	C	T	-0.577249	0.0920496	0.826087	0.795958	FALSE	FALSE	FALSE	6	7663412	0.0895641	397953	0.304067	Guttate psoriasis || id:finngen_R10_L12_PSORI_GUTTATE	6	7663645	0.121072	3.52787e-06	207	Genus_Streptococcus_Antecubitalfossa_Moist_PopGen || id:GCST90133309-2	2	TRUE	0.0989501	22.5124
rs9994801	A	G	A	G	0.432942	0.0061038	0.524155	0.511518	FALSE	FALSE	FALSE	4	90910362	0.0721727	397953	0.932602	Guttate psoriasis || id:finngen_R10_L12_PSORI_GUTTATE	4	91831513	0.094146	7.43619e-06	207	Genus_Streptococcus_Antecubitalfossa_Moist_PopGen || id:GCST90133309-2	2	TRUE	0.0926916	20.943
rs11646200	G	A	G	A	0.667922	-0.0198431	0.702899	0.819107	FALSE	FALSE	FALSE	16	84302146	0.0424889	399474	0.640487	Other and unspecified psoriasis || id:finngen_R10_L12_PSORI_NAS	16	84335752	0.130705	1.06832e-06	138	Genus_Chryseobacterium_Antecubitalfossa_Moist_KORAFF4 || id:GCST90133164-1	2	TRUE	0.159119	25.735
rs12515495	A	G	A	G	-0.621405	-0.00655311	0.704225	0.628401	FALSE	FALSE	FALSE	5	115984410	0.0338345	399474	0.846426	Other and unspecified psoriasis || id:finngen_R10_L12_PSORI_NAS	5	115320107	0.117256	4.40912e-07	142	Genus_Chryseobacterium_Antecubitalfossa_Moist_KORAFF4 || id:GCST90133164-1	2	TRUE	0.165126	27.69
rs1426471	C	T	C	T	0.765605	-0.0753492	0.855634	0.875839	FALSE	FALSE	FALSE	7	136257651	0.0491717	399474	0.125431	Other and unspecified psoriasis || id:finngen_R10_L12_PSORI_NAS	7	135942399	0.160728	4.70421e-06	142	Genus_Chryseobacterium_Antecubitalfossa_Moist_KORAFF4 || id:GCST90133164-1	2	TRUE	0.137771	22.3699
rs1496033	T	C	T	C	-0.582204	-0.0437087	0.625	0.545186	FALSE	FALSE	FALSE	6	147350697	0.032739	399474	0.181854	Other and unspecified psoriasis || id:finngen_R10_L12_PSORI_NAS	6	147671833	0.120958	3.84634e-06	140	Genus_Chryseobacterium_Antecubitalfossa_Moist_KORAFF4 || id:GCST90133164-1	2	TRUE	0.141987	22.8367
rs1569814	T	C	T	C	-0.699088	-0.0015547	0.822695	0.725203	FALSE	FALSE	FALSE	20	15637185	0.0364972	399474	0.966022	Other and unspecified psoriasis || id:finngen_R10_L12_PSORI_NAS	20	15617830	0.147986	5.59279e-06	141	Genus_Chryseobacterium_Antecubitalfossa_Moist_KORAFF4 || id:GCST90133164-1	2	TRUE	0.136645	21.9997
rs35079835	T	C	T	C	-0.968924	-0.0499087	0.912409	0.913039	FALSE	FALSE	FALSE	1	84767500	0.0578769	399474	0.388509	Other and unspecified psoriasis || id:finngen_R10_L12_PSORI_NAS	1	85233183	0.210286	9.32118e-06	137	Genus_Chryseobacterium_Antecubitalfossa_Moist_KORAFF4 || id:GCST90133164-1	2	TRUE	0.134174	20.9205
rs67293833	A	C	A	C	-1.44357	0.0463361	0.957447	0.898407	FALSE	FALSE	FALSE	15	60050655	0.0538727	399474	0.389732	Other and unspecified psoriasis || id:finngen_R10_L12_PSORI_NAS	15	60342854	0.273282	4.80967e-07	141	Genus_Chryseobacterium_Antecubitalfossa_Moist_KORAFF4 || id:GCST90133164-1	2	TRUE	0.165202	27.5073
rs7152314	C	T	C	T	-0.991937	0.0849397	0.919014	0.916946	FALSE	FALSE	FALSE	14	55709294	0.0591651	399474	0.151106	Other and unspecified psoriasis || id:finngen_R10_L12_PSORI_NAS	14	56176012	0.211239	6.26616e-06	142	Genus_Chryseobacterium_Antecubitalfossa_Moist_KORAFF4 || id:GCST90133164-1	2	TRUE	0.134413	21.74
rs74132009	T	G	T	G	-0.904896	-0.0121152	0.910714	0.935122	FALSE	FALSE	FALSE	10	51420462	0.0664533	399474	0.855339	Other and unspecified psoriasis || id:finngen_R10_L12_PSORI_NAS	10	53180222	0.196121	8.9317e-06	140	Genus_Chryseobacterium_Antecubitalfossa_Moist_KORAFF4 || id:GCST90133164-1	2	TRUE	0.131991	20.9845
rs79777996	C	T	C	T	-1.11713	-0.0752947	0.938462	0.930391	FALSE	FALSE	FALSE	5	105657094	0.0644919	399474	0.243007	Other and unspecified psoriasis || id:finngen_R10_L12_PSORI_NAS	5	104992795	0.239871	7.9108e-06	130	Genus_Chryseobacterium_Antecubitalfossa_Moist_KORAFF4 || id:GCST90133164-1	2	TRUE	0.142987	21.356
rs79778624	A	G	A	G	-1.0081	0.0344961	0.929078	0.965464	FALSE	FALSE	FALSE	3	61078195	0.0895176	399474	0.699974	Other and unspecified psoriasis || id:finngen_R10_L12_PSORI_NAS	3	61063868	0.211638	4.73253e-06	141	Genus_Chryseobacterium_Antecubitalfossa_Moist_KORAFF4 || id:GCST90133164-1	2	TRUE	0.138612	22.3674
rs11643968	G	A	G	A	-0.666472	0.018021	0.818841	0.71259	FALSE	FALSE	FALSE	16	84258409	0.0360277	399474	0.616934	Other and unspecified psoriasis || id:finngen_R10_L12_PSORI_NAS	16	84292015	0.142171	6.6302e-06	138	Genus_Chryseobacterium_Antecubitalfossa_Moist_PopGen || id:GCST90133164-2	2	TRUE	0.137369	21.6572
rs11742607	A	G	A	G	-0.593827	0.0455641	0.746377	0.786829	FALSE	FALSE	FALSE	5	173539048	0.0399599	399474	0.254183	Other and unspecified psoriasis || id:finngen_R10_L12_PSORI_NAS	5	172966051	0.127046	7.02367e-06	138	Genus_Chryseobacterium_Antecubitalfossa_Moist_PopGen || id:GCST90133164-2	2	TRUE	0.136675	21.5305
rs1350519	G	A	G	A	-0.644135	0.0470736	0.75	0.734033	FALSE	FALSE	FALSE	12	75187221	0.0369199	399474	0.202302	Other and unspecified psoriasis || id:finngen_R10_L12_PSORI_NAS	12	75581001	0.138013	7.22974e-06	138	Genus_Chryseobacterium_Antecubitalfossa_Moist_PopGen || id:GCST90133164-2	2	TRUE	0.136327	21.467
rs28794896	G	A	G	A	-1.16864	-0.0126572	0.945652	0.945791	FALSE	FALSE	FALSE	18	3144150	0.0719948	399474	0.860446	Other and unspecified psoriasis || id:finngen_R10_L12_PSORI_NAS	18	3144148	0.252015	8.1964e-06	138	Genus_Chryseobacterium_Antecubitalfossa_Moist_PopGen || id:GCST90133164-2	2	TRUE	0.134815	21.1919
rs3779412	T	C	T	C	-0.95953	0.0139443	0.902174	0.895231	FALSE	FALSE	FALSE	7	74210798	0.0531004	399474	0.792857	Other and unspecified psoriasis || id:finngen_R10_L12_PSORI_NAS	7	73625128	0.177393	2.76913e-07	138	Genus_Chryseobacterium_Antecubitalfossa_Moist_PopGen || id:GCST90133164-2	2	TRUE	0.174928	28.834
rs4614053	T	C	T	C	0.546075	0.00538097	0.550725	0.546608	FALSE	FALSE	FALSE	9	8726343	0.032721	399474	0.869377	Other and unspecified psoriasis || id:finngen_R10_L12_PSORI_NAS	9	8726343	0.110212	2.11522e-06	138	Genus_Chryseobacterium_Antecubitalfossa_Moist_PopGen || id:GCST90133164-2	2	TRUE	0.15103	24.194
rs58092190	C	T	C	T	-0.816789	0.0385579	0.894928	0.913707	FALSE	FALSE	FALSE	13	26860278	0.058278	399474	0.508214	Other and unspecified psoriasis || id:finngen_R10_L12_PSORI_NAS	13	27434415	0.177887	9.9072e-06	138	Genus_Chryseobacterium_Antecubitalfossa_Moist_PopGen || id:GCST90133164-2	2	TRUE	0.132529	20.7775
rs6842379	T	C	T	C	0.534112	-0.0425232	0.496377	0.574184	FALSE	FALSE	FALSE	4	79685589	0.0331778	399474	0.199957	Other and unspecified psoriasis || id:finngen_R10_L12_PSORI_NAS	4	80606743	0.106652	1.67653e-06	138	Genus_Chryseobacterium_Antecubitalfossa_Moist_PopGen || id:GCST90133164-2	2	TRUE	0.153789	24.7164
rs75794610	C	A	C	A	-1.14969	-0.0847984	0.934783	0.956927	FALSE	FALSE	FALSE	3	12087576	0.0807065	399474	0.293396	Other and unspecified psoriasis || id:finngen_R10_L12_PSORI_NAS	3	12129076	0.230452	1.82285e-06	138	Genus_Chryseobacterium_Antecubitalfossa_Moist_PopGen || id:GCST90133164-2	2	TRUE	0.152796	24.5281
rs7605658	C	T	C	T	-0.577245	-0.0315228	0.550725	0.568695	FALSE	FALSE	FALSE	2	45183783	0.0331631	399474	0.341839	Other and unspecified psoriasis || id:finngen_R10_L12_PSORI_NAS	2	45410922	0.113037	1.08474e-06	138	Genus_Chryseobacterium_Antecubitalfossa_Moist_PopGen || id:GCST90133164-2	2	TRUE	0.158939	25.7004
rs9490285	T	C	T	C	0.77701	0.0105883	0.851449	0.883178	FALSE	FALSE	FALSE	6	121470947	0.050938	399474	0.835334	Other and unspecified psoriasis || id:finngen_R10_L12_PSORI_NAS	6	121792093	0.165738	6.62032e-06	138	Genus_Chryseobacterium_Antecubitalfossa_Moist_PopGen || id:GCST90133164-2	2	TRUE	0.137387	21.6604
rs1028134	T	C	T	C	-0.628993	0.0460369	0.891051	0.896186	FALSE	FALSE	FALSE	16	27117364	0.0540444	399474	0.394306	Other and unspecified psoriasis || id:finngen_R10_L12_PSORI_NAS	16	27128685	0.129623	2.12556e-06	257	Genus_Acinetobacter_Antecubitalfossa_Moist_KORAFF4 || id:GCST90133165-1	2	TRUE	0.0839304	23.3631
rs145093695	C	T	C	T	-0.606542	-0.0456183	0.866667	0.837374	FALSE	FALSE	FALSE	6	131325769	0.0443214	399474	0.303358	Other and unspecified psoriasis || id:finngen_R10_L12_PSORI_NAS	6	131646909	0.130782	5.6504e-06	255	Genus_Acinetobacter_Antecubitalfossa_Moist_KORAFF4 || id:GCST90133165-1	2	TRUE	0.0777883	21.3405
rs6027039	C	T	C	T	-0.428276	-0.0184725	0.730189	0.721029	FALSE	FALSE	FALSE	20	38649915	0.0363236	399474	0.611066	Other and unspecified psoriasis || id:finngen_R10_L12_PSORI_NAS	20	37278558	0.0918919	5.01426e-06	265	Genus_Acinetobacter_Antecubitalfossa_Moist_KORAFF4 || id:GCST90133165-1	2	TRUE	0.0757589	21.5578
rs7138651	G	A	G	A	0.456525	-0.0404559	0.709924	0.805158	FALSE	FALSE	FALSE	12	81859836	0.0412759	399474	0.327021	Other and unspecified psoriasis || id:finngen_R10_L12_PSORI_NAS	12	82253615	0.0937787	1.95714e-06	262	Genus_Acinetobacter_Antecubitalfossa_Moist_KORAFF4 || id:GCST90133165-1	2	TRUE	0.0829494	23.5176
rs72978489	A	T	A	T	0.833633	0.027073	0.94186	0.967067	FALSE	TRUE	FALSE	4	157090718	0.0916728	399474	0.767749	Other and unspecified psoriasis || id:finngen_R10_L12_PSORI_NAS	4	158011870	0.177532	4.33649e-06	258	Genus_Acinetobacter_Antecubitalfossa_Moist_KORAFF4 || id:GCST90133165-1	2	TRUE	0.0787338	21.8784
rs1026059	A	G	A	G	0.487648	0.0123082	0.608374	0.655465	FALSE	FALSE	FALSE	12	127312430	0.0344001	399474	0.720497	Other and unspecified psoriasis || id:finngen_R10_L12_PSORI_NAS	12	127796975	0.0972471	1.16494e-06	203	Genus_Acinetobacter_Antecubitalfossa_Moist_PopGen || id:GCST90133165-2	2	TRUE	0.110217	24.8977
rs10411016	G	T	G	T	0.426591	0.00780579	0.541872	0.537342	FALSE	FALSE	FALSE	19	7680157	0.0328149	399474	0.811979	Other and unspecified psoriasis || id:finngen_R10_L12_PSORI_NAS	19	7745043	0.0926989	7.408e-06	203	Genus_Acinetobacter_Antecubitalfossa_Moist_PopGen || id:GCST90133165-2	2	TRUE	0.0944674	20.9688
rs1045502	G	A	G	A	-0.807112	-0.0390013	0.923645	0.870519	FALSE	FALSE	FALSE	11	252818	0.0485584	399474	0.421869	Other and unspecified psoriasis || id:finngen_R10_L12_PSORI_NAS	11	252818	0.177664	9.56004e-06	203	Genus_Acinetobacter_Antecubitalfossa_Moist_PopGen || id:GCST90133165-2	2	TRUE	0.0922828	20.4346
rs116626252	G	T	G	T	-0.702901	0.0386229	0.884236	0.900061	FALSE	FALSE	FALSE	2	115566882	0.0546094	399474	0.479407	Other and unspecified psoriasis || id:finngen_R10_L12_PSORI_NAS	2	116324458	0.152812	7.47656e-06	203	Genus_Acinetobacter_Antecubitalfossa_Moist_PopGen || id:GCST90133165-2	2	TRUE	0.0943886	20.9495
rs1588687	A	G	A	G	0.493178	0.0478547	0.704433	0.778869	FALSE	FALSE	FALSE	12	17288543	0.0391774	399474	0.221901	Other and unspecified psoriasis || id:finngen_R10_L12_PSORI_NAS	12	17441477	0.107499	7.8779e-06	203	Genus_Acinetobacter_Antecubitalfossa_Moist_PopGen || id:GCST90133165-2	2	TRUE	0.0939409	20.8398
rs3012557	A	G	A	G	-0.502324	-0.0118444	0.665025	0.611442	FALSE	FALSE	FALSE	6	73862086	0.0334123	399474	0.72297	Other and unspecified psoriasis || id:finngen_R10_L12_PSORI_NAS	6	74571797	0.107426	5.35897e-06	203	Genus_Acinetobacter_Antecubitalfossa_Moist_PopGen || id:GCST90133165-2	2	TRUE	0.0972366	21.6497
rs6832067	T	C	T	C	0.466514	0.0166782	0.593596	0.529174	FALSE	FALSE	FALSE	4	186402766	0.032789	399474	0.610995	Other and unspecified psoriasis || id:finngen_R10_L12_PSORI_NAS	4	187323920	0.097513	3.31931e-06	203	Genus_Acinetobacter_Antecubitalfossa_Moist_PopGen || id:GCST90133165-2	2	TRUE	0.101324	22.6623
rs7084649	T	C	T	C	-0.845772	-0.11416	0.933498	0.952941	FALSE	FALSE	FALSE	10	95411774	0.0773887	399474	0.140172	Other and unspecified psoriasis || id:finngen_R10_L12_PSORI_NAS	10	97171531	0.17982	4.74929e-06	203	Genus_Acinetobacter_Antecubitalfossa_Moist_PopGen || id:GCST90133165-2	2	TRUE	0.0982682	21.9044
rs10132025	G	A	G	A	-0.617809	0.0199394	0.828652	0.847042	FALSE	FALSE	FALSE	14	33323423	0.0456416	399474	0.662206	Other and unspecified psoriasis || id:finngen_R10_L12_PSORI_NAS	14	33792629	0.133178	6.8107e-06	178	Genus_Paracoccus_Antecubitalfossa_Moist_KORAFF4 || id:GCST90133166-1	2	TRUE	0.107859	21.2783
rs118128871	A	C	A	C	-0.957354	0.0774169	0.936416	0.964228	FALSE	FALSE	FALSE	8	64955211	0.088159	399474	0.379861	Other and unspecified psoriasis || id:finngen_R10_L12_PSORI_NAS	8	65867446	0.204565	5.81229e-06	173	Genus_Paracoccus_Antecubitalfossa_Moist_KORAFF4 || id:GCST90133166-1	2	TRUE	0.112374	21.6487
rs1991250	T	C	T	C	-0.482753	-0.013514	0.641618	0.640834	FALSE	FALSE	FALSE	15	59947613	0.0339138	399474	0.690276	Other and unspecified psoriasis || id:finngen_R10_L12_PSORI_NAS	15	60239812	0.10437	7.35012e-06	173	Genus_Paracoccus_Antecubitalfossa_Moist_KORAFF4 || id:GCST90133166-1	2	TRUE	0.110057	21.1471
rs2176664	C	T	C	T	-0.52228	0.0386237	0.716667	0.614879	FALSE	FALSE	FALSE	17	12616554	0.0334783	399474	0.248626	Other and unspecified psoriasis || id:finngen_R10_L12_PSORI_NAS	17	12519871	0.113884	8.49046e-06	180	Genus_Paracoccus_Antecubitalfossa_Moist_KORAFF4 || id:GCST90133166-1	2	TRUE	0.10462	20.7983
rs2767625	A	G	A	G	0.558512	0.113906	0.535928	0.366522	FALSE	FALSE	FALSE	10	29969685	0.0333531	399474	0.000637441	Other and unspecified psoriasis || id:finngen_R10_L12_PSORI_NAS	10	30258614	0.109799	9.81757e-07	167	Genus_Paracoccus_Antecubitalfossa_Moist_KORAFF4 || id:GCST90133166-1	2	TRUE	0.134151	25.5643
rs759572	C	T	C	T	0.521608	0.0928062	0.636111	0.523954	FALSE	FALSE	FALSE	12	97089257	0.0324852	399474	0.00427839	Other and unspecified psoriasis || id:finngen_R10_L12_PSORI_NAS	12	97483035	0.110784	5.00675e-06	180	Genus_Paracoccus_Antecubitalfossa_Moist_KORAFF4 || id:GCST90133166-1	2	TRUE	0.109653	21.922
rs113280186	A	C	A	C	-0.662469	0.00397338	0.872283	0.887933	FALSE	FALSE	FALSE	9	18218509	0.0520265	399474	0.939123	Other and unspecified psoriasis || id:finngen_R10_L12_PSORI_NAS	9	18218507	0.141997	5.95156e-06	184	Genus_Paracoccus_Antecubitalfossa_Moist_PopGen || id:GCST90133166-2	2	TRUE	0.10578	21.5292
rs11711418	G	A	G	A	-0.453469	0.0108707	0.535326	0.524613	FALSE	FALSE	FALSE	3	8498999	0.0326952	399474	0.739522	Other and unspecified psoriasis || id:finngen_R10_L12_PSORI_NAS	3	8540685	0.0994445	9.36987e-06	184	Genus_Paracoccus_Antecubitalfossa_Moist_PopGen || id:GCST90133166-2	2	TRUE	0.101535	20.5678
rs12537030	A	G	A	G	0.72322	0.0302792	0.869565	0.877708	FALSE	FALSE	FALSE	7	116191853	0.0496418	399474	0.541892	Other and unspecified psoriasis || id:finngen_R10_L12_PSORI_NAS	7	115831907	0.151734	3.82582e-06	184	Genus_Paracoccus_Antecubitalfossa_Moist_PopGen || id:GCST90133166-2	2	TRUE	0.1099	22.4714
rs1565556	C	T	C	T	-0.511289	0.0129868	0.722826	0.7161	FALSE	FALSE	FALSE	3	70547534	0.0361932	399474	0.719731	Other and unspecified psoriasis || id:finngen_R10_L12_PSORI_NAS	3	70596685	0.105329	2.59106e-06	184	Genus_Paracoccus_Antecubitalfossa_Moist_PopGen || id:GCST90133166-2	2	TRUE	0.113523	23.3071
rs35978580	G	A	G	A	-0.67742	0.0354192	0.861413	0.808061	FALSE	FALSE	FALSE	15	80737220	0.0411515	399474	0.389403	Other and unspecified psoriasis || id:finngen_R10_L12_PSORI_NAS	15	81029561	0.141851	3.67365e-06	184	Genus_Paracoccus_Antecubitalfossa_Moist_PopGen || id:GCST90133166-2	2	TRUE	0.110278	22.5582
rs453604	A	G	A	G	-0.639573	-0.0319997	0.820652	0.788317	FALSE	FALSE	FALSE	1	40344186	0.0399896	399474	0.423595	Other and unspecified psoriasis || id:finngen_R10_L12_PSORI_NAS	1	40809858	0.127676	1.28594e-06	184	Genus_Paracoccus_Antecubitalfossa_Moist_PopGen || id:GCST90133166-2	2	TRUE	0.120012	24.8209
rs7582082	A	C	A	C	0.479833	-0.0080166	0.57337	0.521302	FALSE	FALSE	FALSE	2	138221758	0.032726	399474	0.806486	Other and unspecified psoriasis || id:finngen_R10_L12_PSORI_NAS	2	138979328	0.0981613	2.22519e-06	184	Genus_Paracoccus_Antecubitalfossa_Moist_PopGen || id:GCST90133166-2	2	TRUE	0.114936	23.6348
rs7914010	G	C	G	C	0.492084	-0.0154232	0.600543	0.617581	FALSE	TRUE	FALSE	10	88100671	0.0336084	399474	0.6463	Other and unspecified psoriasis || id:finngen_R10_L12_PSORI_NAS	10	89860428	0.102809	3.50233e-06	184	Genus_Paracoccus_Antecubitalfossa_Moist_PopGen || id:GCST90133166-2	2	TRUE	0.110722	22.6604
rs9394726	G	A	G	A	-0.868284	0.0561724	0.915761	0.895759	FALSE	FALSE	FALSE	6	40742640	0.0533448	399474	0.292338	Other and unspecified psoriasis || id:finngen_R10_L12_PSORI_NAS	6	40710379	0.168678	6.80178e-07	184	Genus_Paracoccus_Antecubitalfossa_Moist_PopGen || id:GCST90133166-2	2	TRUE	0.125881	26.2096
rs10433290	G	A	G	A	-0.613774	0.0165631	0.828804	0.770132	FALSE	FALSE	FALSE	22	17545891	0.0388684	399474	0.670011	Other and unspecified psoriasis || id:finngen_R10_L12_PSORI_NAS	22	18025580	0.125404	2.16432e-06	184	Genus_Rothia_Antecubitalfossa_Moist_PopGen || id:GCST90133167-2	2	TRUE	0.115193	23.6946
rs11044406	G	A	G	A	-0.943457	0.142108	0.940217	0.909811	FALSE	FALSE	FALSE	12	19083553	0.0572486	399474	0.0130536	Other and unspecified psoriasis || id:finngen_R10_L12_PSORI_NAS	12	19236487	0.203148	6.52471e-06	184	Genus_Rothia_Antecubitalfossa_Moist_PopGen || id:GCST90133167-2	2	TRUE	0.104921	21.334
rs1563054	T	C	T	C	0.576221	0.0535402	0.758152	0.763951	FALSE	FALSE	FALSE	11	44796080	0.0383996	399474	0.16323	Other and unspecified psoriasis || id:finngen_R10_L12_PSORI_NAS	11	44817630	0.118736	2.6054e-06	184	Genus_Rothia_Antecubitalfossa_Moist_PopGen || id:GCST90133167-2	2	TRUE	0.113472	23.2953
rs8074279	C	T	C	T	0.468643	-0.00685457	0.619565	0.728806	FALSE	FALSE	FALSE	17	61717266	0.0365971	399474	0.851427	Other and unspecified psoriasis || id:finngen_R10_L12_PSORI_NAS	17	59794627	0.100347	5.82728e-06	184	Genus_Rothia_Antecubitalfossa_Moist_PopGen || id:GCST90133167-2	2	TRUE	0.105977	21.5741
rs9820287	C	T	C	T	-0.558929	0.0169734	0.798913	0.821168	FALSE	FALSE	FALSE	3	133165906	0.0425178	399474	0.689741	Other and unspecified psoriasis || id:finngen_R10_L12_PSORI_NAS	3	132884750	0.11888	5.08253e-06	184	Genus_Rothia_Antecubitalfossa_Moist_PopGen || id:GCST90133167-2	2	TRUE	0.107253	21.8651
rs12440581	G	A	G	A	0.422764	-0.0144197	0.53373	0.557143	FALSE	FALSE	FALSE	15	33656462	0.0327956	399474	0.660166	Other and unspecified psoriasis || id:finngen_R10_L12_PSORI_NAS	15	33948663	0.087947	2.64622e-06	252	Genus_Staphylococcus_Forehead_Sebaceous_PopGen || id:GCST90133199-1	2	TRUE	0.0839947	22.9242
rs12622075	T	C	T	C	0.492211	-0.0237961	0.77381	0.769402	FALSE	FALSE	FALSE	2	179259177	0.0386535	399474	0.538141	Other and unspecified psoriasis || id:finngen_R10_L12_PSORI_NAS	2	180123904	0.106381	5.96361e-06	252	Genus_Staphylococcus_Forehead_Sebaceous_PopGen || id:GCST90133199-1	2	TRUE	0.0783007	21.2381
rs2144125	G	A	G	A	0.7163	0.0166735	0.920635	0.878852	FALSE	FALSE	FALSE	20	8693359	0.0497559	399474	0.737544	Other and unspecified psoriasis || id:finngen_R10_L12_PSORI_NAS	20	8674006	0.157623	8.58374e-06	252	Genus_Staphylococcus_Forehead_Sebaceous_PopGen || id:GCST90133199-1	2	TRUE	0.0757426	20.4874
rs2443768	A	C	A	C	-0.591699	-0.0282796	0.871032	0.920981	FALSE	FALSE	FALSE	5	21701728	0.060227	399474	0.638677	Other and unspecified psoriasis || id:finngen_R10_L12_PSORI_NAS	5	21701837	0.128874	6.98169e-06	252	Genus_Staphylococcus_Forehead_Sebaceous_PopGen || id:GCST90133199-1	2	TRUE	0.077194	20.9129
rs2463117	T	C	T	C	0.56371	0.0160638	0.829365	0.831572	FALSE	FALSE	FALSE	14	61528955	0.0438557	399474	0.714151	Other and unspecified psoriasis || id:finngen_R10_L12_PSORI_NAS	14	61995673	0.117997	3.03033e-06	252	Genus_Staphylococcus_Forehead_Sebaceous_PopGen || id:GCST90133199-1	2	TRUE	0.0830462	22.6419
rs2973139	T	C	T	C	-0.571799	0.00593825	0.825397	0.791807	FALSE	FALSE	FALSE	5	153169261	0.0400582	399474	0.882153	Other and unspecified psoriasis || id:finngen_R10_L12_PSORI_NAS	5	152548821	0.113586	9.19222e-07	252	Genus_Staphylococcus_Forehead_Sebaceous_PopGen || id:GCST90133199-1	2	TRUE	0.0913741	25.1407
rs4665554	C	T	C	T	-0.437931	0.061862	0.583333	0.493016	FALSE	FALSE	FALSE	2	23127619	0.0327983	399474	0.0592762	Other and unspecified psoriasis || id:finngen_R10_L12_PSORI_NAS	2	23350490	0.085642	6.29529e-07	252	Genus_Staphylococcus_Forehead_Sebaceous_PopGen || id:GCST90133199-1	2	TRUE	0.0940072	25.9404
rs9762321	T	G	T	G	0.465675	0.0581724	0.714286	0.66704	FALSE	FALSE	FALSE	4	179986596	0.0347763	399474	0.0943735	Other and unspecified psoriasis || id:finngen_R10_L12_PSORI_NAS	4	180907749	0.0974505	3.01329e-06	252	Genus_Staphylococcus_Forehead_Sebaceous_PopGen || id:GCST90133199-1	2	TRUE	0.0830856	22.6536
rs112162072	A	G	A	G	0.740482	0.0909433	0.943548	0.916894	FALSE	FALSE	FALSE	7	20601415	0.0591456	399474	0.124142	Other and unspecified psoriasis || id:finngen_R10_L12_PSORI_NAS	7	20641038	0.16096	6.16808e-06	310	Genus_Staphylococcus_Retroauricularfold_Sebaceous_KORAFF4 || id:GCST90133199-2	2	TRUE	0.0639073	21.0272
rs1283671	C	T	C	T	0.552612	-0.0256405	0.873016	0.895315	FALSE	FALSE	FALSE	8	107421459	0.0534085	399474	0.631168	Other and unspecified psoriasis || id:finngen_R10_L12_PSORI_NAS	8	108433687	0.116536	3.21998e-06	315	Genus_Staphylococcus_Retroauricularfold_Sebaceous_KORAFF4 || id:GCST90133199-2	2	TRUE	0.0666287	22.3435
rs142690890	C	T	C	T	0.765806	-0.10682	0.942857	0.927793	FALSE	FALSE	FALSE	13	23310276	0.0631007	399474	0.0904836	Other and unspecified psoriasis || id:finngen_R10_L12_PSORI_NAS	13	23884415	0.161926	3.41247e-06	315	Genus_Staphylococcus_Retroauricularfold_Sebaceous_KORAFF4 || id:GCST90133199-2	2	TRUE	0.066298	22.2247
rs2013210	A	G	A	G	-0.37162	-0.00636664	0.68254	0.69845	FALSE	FALSE	FALSE	18	59479263	0.0354969	399474	0.857657	Other and unspecified psoriasis || id:finngen_R10_L12_PSORI_NAS	18	57146495	0.0823968	9.17334e-06	315	Genus_Staphylococcus_Retroauricularfold_Sebaceous_KORAFF4 || id:GCST90133199-2	2	TRUE	0.0606583	20.2121
rs4959153	A	G	A	G	-0.427495	-0.0327708	0.72293	0.808137	FALSE	FALSE	FALSE	6	1723371	0.0413709	399474	0.428289	Other and unspecified psoriasis || id:finngen_R10_L12_PSORI_NAS	6	1723605	0.0894124	2.6903e-06	314	Genus_Staphylococcus_Retroauricularfold_Sebaceous_KORAFF4 || id:GCST90133199-2	2	TRUE	0.0678604	22.7138
rs61975175	A	G	A	G	0.653722	-0.00683203	0.914013	0.930891	FALSE	FALSE	FALSE	13	105829077	0.0640341	399474	0.915032	Other and unspecified psoriasis || id:finngen_R10_L12_PSORI_NAS	13	106481426	0.140864	5.11659e-06	314	Genus_Staphylococcus_Retroauricularfold_Sebaceous_KORAFF4 || id:GCST90133199-2	2	TRUE	0.064187	21.3999
rs62138459	T	C	T	C	-0.497753	-0.0716748	0.832797	0.797096	FALSE	FALSE	FALSE	2	47357596	0.0405406	399474	0.0770655	Other and unspecified psoriasis || id:finngen_R10_L12_PSORI_NAS	2	47584735	0.101008	1.35796e-06	311	Genus_Staphylococcus_Retroauricularfold_Sebaceous_KORAFF4 || id:GCST90133199-2	2	TRUE	0.0724278	24.1277
rs62275583	C	T	C	T	-0.683464	0.0515911	0.916667	0.874191	FALSE	FALSE	FALSE	3	153201322	0.0494874	399474	0.297175	Other and unspecified psoriasis || id:finngen_R10_L12_PSORI_NAS	3	152919111	0.147221	5.12913e-06	306	Genus_Staphylococcus_Retroauricularfold_Sebaceous_KORAFF4 || id:GCST90133199-2	2	TRUE	0.0657976	21.4113
rs73167292	C	T	C	T	0.786664	0.0201714	0.92381	0.905198	FALSE	FALSE	FALSE	3	172371155	0.0555644	399474	0.716584	Other and unspecified psoriasis || id:finngen_R10_L12_PSORI_NAS	3	172088945	0.147228	1.76192e-07	315	Genus_Staphylococcus_Retroauricularfold_Sebaceous_KORAFF4 || id:GCST90133199-2	2	TRUE	0.0831011	28.3681
rs74538992	A	G	A	G	0.682807	0.0770028	0.928797	0.95395	FALSE	FALSE	FALSE	5	126027010	0.0784347	399474	0.326226	Other and unspecified psoriasis || id:finngen_R10_L12_PSORI_NAS	5	125362703	0.149262	6.87874e-06	316	Genus_Staphylococcus_Retroauricularfold_Sebaceous_KORAFF4 || id:GCST90133199-2	2	TRUE	0.0621101	20.7941
rs74962111	G	A	G	A	-0.665159	-0.0464623	0.920886	0.970103	FALSE	FALSE	FALSE	12	73601526	0.0966786	399474	0.630811	Other and unspecified psoriasis || id:finngen_R10_L12_PSORI_NAS	12	73995306	0.139926	3.04726e-06	316	Genus_Staphylococcus_Retroauricularfold_Sebaceous_KORAFF4 || id:GCST90133199-2	2	TRUE	0.0667376	22.4542
rs10508687	T	C	T	C	0.949608	0.0429938	0.950397	0.946249	FALSE	FALSE	FALSE	10	25037008	0.0720035	399474	0.550436	Other and unspecified psoriasis || id:finngen_R10_L12_PSORI_NAS	10	25325937	0.194377	1.84475e-06	252	Genus_Propionibacterium_Forehead_Sebaceous_PopGen || id:GCST90133201-1	2	TRUE	0.0865166	23.6777
rs10847912	G	T	G	T	-0.418054	0.0119097	0.650794	0.621716	FALSE	FALSE	FALSE	12	129619009	0.0335627	399474	0.722702	Other and unspecified psoriasis || id:finngen_R10_L12_PSORI_NAS	12	130103554	0.0884505	3.81776e-06	252	Genus_Propionibacterium_Forehead_Sebaceous_PopGen || id:GCST90133201-1	2	TRUE	0.0814285	22.1617
rs1549112	C	T	C	T	-0.398624	0.0238739	0.56746	0.677011	FALSE	FALSE	FALSE	3	175369175	0.0349108	399474	0.494067	Other and unspecified psoriasis || id:finngen_R10_L12_PSORI_NAS	3	175086964	0.0848908	4.38405e-06	252	Genus_Propionibacterium_Forehead_Sebaceous_PopGen || id:GCST90133201-1	2	TRUE	0.0804591	21.8748
rs62086066	C	T	C	T	0.536485	-0.0422783	0.837302	0.872056	FALSE	FALSE	FALSE	18	9432178	0.0489577	399474	0.387824	Other and unspecified psoriasis || id:finngen_R10_L12_PSORI_NAS	18	9432176	0.116144	6.17261e-06	252	Genus_Propionibacterium_Forehead_Sebaceous_PopGen || id:GCST90133201-1	2	TRUE	0.0780589	21.167
rs9849313	T	C	T	C	0.449495	0.00705187	0.686508	0.772815	FALSE	FALSE	FALSE	3	29788384	0.0389302	399474	0.856257	Other and unspecified psoriasis || id:finngen_R10_L12_PSORI_NAS	3	29829875	0.0941435	3.06877e-06	252	Genus_Propionibacterium_Forehead_Sebaceous_PopGen || id:GCST90133201-1	2	TRUE	0.0829579	22.6156
rs1016631	C	G	C	G	0.503772	0.0133302	0.846645	0.828108	FALSE	TRUE	FALSE	21	21874511	0.0434333	399474	0.758911	Other and unspecified psoriasis || id:finngen_R10_L12_PSORI_NAS	21	23246831	0.109138	5.73242e-06	313	Genus_Propionibacterium_Retroauricularfold_Sebaceous_KORAFF4 || id:GCST90133201-2	2	TRUE	0.0637337	21.1705
rs12155690	C	T	C	T	0.536922	0.00838141	0.826667	0.827719	FALSE	FALSE	FALSE	8	107135804	0.0433041	399474	0.84653	Other and unspecified psoriasis || id:finngen_R10_L12_PSORI_NAS	8	108148032	0.10558	6.4961e-07	300	Genus_Propionibacterium_Retroauricularfold_Sebaceous_KORAFF4 || id:GCST90133201-2	2	TRUE	0.0793638	25.6892
rs13006272	T	C	T	C	0.461005	0.0675316	0.824921	0.792418	FALSE	FALSE	FALSE	2	106207196	0.0401227	399474	0.0923507	Other and unspecified psoriasis || id:finngen_R10_L12_PSORI_NAS	2	106823652	0.0993556	5.11849e-06	317	Genus_Propionibacterium_Retroauricularfold_Sebaceous_KORAFF4 || id:GCST90133201-2	2	TRUE	0.063596	21.3933
rs13320213	C	T	C	T	0.536934	-0.015783	0.835962	0.778576	FALSE	FALSE	FALSE	3	168161920	0.0394644	399474	0.689208	Other and unspecified psoriasis || id:finngen_R10_L12_PSORI_NAS	3	167879708	0.108521	1.22439e-06	317	Genus_Propionibacterium_Retroauricularfold_Sebaceous_KORAFF4 || id:GCST90133201-2	2	TRUE	0.0716888	24.3259
rs141801863	C	T	C	T	0.700061	0.0403308	0.928571	0.955826	FALSE	FALSE	FALSE	11	134600669	0.0793669	399474	0.611343	Other and unspecified psoriasis || id:finngen_R10_L12_PSORI_NAS	11	134470563	0.154847	8.8095e-06	308	Genus_Propionibacterium_Retroauricularfold_Sebaceous_KORAFF4 || id:GCST90133201-2	2	TRUE	0.0622319	20.3067
rs211830	A	G	A	G	0.392817	-0.0502722	0.498423	0.546931	FALSE	FALSE	FALSE	20	39851808	0.0326922	399474	0.124111	Other and unspecified psoriasis || id:finngen_R10_L12_PSORI_NAS	20	38480450	0.078895	1.05476e-06	317	Genus_Propionibacterium_Retroauricularfold_Sebaceous_KORAFF4 || id:GCST90133201-2	2	TRUE	0.0725306	24.6338
rs2277868	T	C	T	C	0.39607	-0.0200819	0.735016	0.746027	FALSE	FALSE	FALSE	20	17699899	0.037506	399474	0.592352	Other and unspecified psoriasis || id:finngen_R10_L12_PSORI_NAS	20	17680544	0.0837485	3.40501e-06	317	Genus_Propionibacterium_Retroauricularfold_Sebaceous_KORAFF4 || id:GCST90133201-2	2	TRUE	0.0659054	22.2249
rs2698569	C	T	C	T	0.793764	0.00470375	0.935127	0.927579	FALSE	FALSE	FALSE	11	18437833	0.0626845	399474	0.940184	Other and unspecified psoriasis || id:finngen_R10_L12_PSORI_NAS	11	18459380	0.153544	4.18332e-07	316	Genus_Propionibacterium_Retroauricularfold_Sebaceous_KORAFF4 || id:GCST90133201-2	2	TRUE	0.077978	26.5559
rs36117378	C	G	C	G	0.603202	0.0819979	0.876271	0.917455	FALSE	TRUE	FALSE	8	72344361	0.0597352	399474	0.169849	Other and unspecified psoriasis || id:finngen_R10_L12_PSORI_NAS	8	73256596	0.11835	6.20567e-07	295	Genus_Propionibacterium_Retroauricularfold_Sebaceous_KORAFF4 || id:GCST90133201-2	2	TRUE	0.0809314	25.801
rs73370168	A	G	A	G	0.777925	0.101284	0.940895	0.945699	FALSE	FALSE	FALSE	10	122100324	0.0720831	399474	0.159993	Other and unspecified psoriasis || id:finngen_R10_L12_PSORI_NAS	10	123859839	0.16504	3.67834e-06	313	Genus_Propionibacterium_Retroauricularfold_Sebaceous_KORAFF4 || id:GCST90133201-2	2	TRUE	0.066278	22.0756
rs75590953	C	T	C	T	0.458714	-0.0757705	0.823052	0.8389	FALSE	FALSE	FALSE	16	79876212	0.0443311	399474	0.0874158	Other and unspecified psoriasis || id:finngen_R10_L12_PSORI_NAS	16	79910109	0.101095	8.18914e-06	308	Genus_Propionibacterium_Retroauricularfold_Sebaceous_KORAFF4 || id:GCST90133201-2	2	TRUE	0.0626577	20.4549
rs75666428	A	G	A	G	0.798376	-0.124971	0.9375	0.952566	FALSE	FALSE	FALSE	15	84012650	0.0772175	399474	0.10557	Other and unspecified psoriasis || id:finngen_R10_L12_PSORI_NAS	15	84681402	0.153076	3.35742e-07	312	Genus_Propionibacterium_Retroauricularfold_Sebaceous_KORAFF4 || id:GCST90133201-2	2	TRUE	0.0801942	27.0277
rs7656419	G	T	G	T	0.521765	0.00670985	0.8367	0.884072	FALSE	FALSE	FALSE	4	189777963	0.0507707	399474	0.894858	Other and unspecified psoriasis || id:finngen_R10_L12_PSORI_NAS	4	190699117	0.109772	3.13426e-06	297	Genus_Propionibacterium_Retroauricularfold_Sebaceous_KORAFF4 || id:GCST90133201-2	2	TRUE	0.0706917	22.4404
rs79565510	A	T	A	T	0.892609	-0.151812	0.94127	0.97826	FALSE	TRUE	FALSE	12	67985845	0.112122	399474	0.175739	Other and unspecified psoriasis || id:finngen_R10_L12_PSORI_NAS	12	68379625	0.157842	3.51287e-08	315	Genus_Propionibacterium_Retroauricularfold_Sebaceous_KORAFF4 || id:GCST90133201-2	2	TRUE	0.0921664	31.7768
rs8039423	G	A	G	A	0.402059	-0.0137459	0.749191	0.820926	FALSE	FALSE	FALSE	15	54158175	0.0425112	399474	0.746432	Other and unspecified psoriasis || id:finngen_R10_L12_PSORI_NAS	15	54450372	0.0885389	8.05095e-06	309	Genus_Propionibacterium_Retroauricularfold_Sebaceous_KORAFF4 || id:GCST90133201-2	2	TRUE	0.0625599	20.4876
rs1417689	T	C	T	C	-0.429214	0.000631436	0.696429	0.585283	FALSE	FALSE	FALSE	6	63126735	0.0331363	399474	0.984797	Other and unspecified psoriasis || id:finngen_R10_L12_PSORI_NAS	6	63836640	0.0934016	6.85792e-06	252	Genus_Corynebacterium_Forehead_Sebaceous_PopGen || id:GCST90133202-1	2	TRUE	0.0773196	20.9497
rs1521825	A	G	A	G	-0.431833	0.00744552	0.613095	0.675639	FALSE	FALSE	FALSE	8	83172197	0.0348182	399474	0.830672	Other and unspecified psoriasis || id:finngen_R10_L12_PSORI_NAS	8	84084432	0.0924111	4.8556e-06	252	Genus_Corynebacterium_Forehead_Sebaceous_PopGen || id:GCST90133202-1	2	TRUE	0.0797428	21.6632
rs7244378	G	A	G	A	0.571015	-0.0092561	0.80754	0.822499	FALSE	FALSE	FALSE	18	63435607	0.0426158	399474	0.828054	Other and unspecified psoriasis || id:finngen_R10_L12_PSORI_NAS	18	61102840	0.109377	3.75178e-07	252	Genus_Corynebacterium_Forehead_Sebaceous_PopGen || id:GCST90133202-1	2	TRUE	0.0975991	27.0387
rs75742406	G	A	G	A	0.491584	-0.0430747	0.765873	0.722252	FALSE	FALSE	FALSE	11	17048818	0.0363922	399474	0.236562	Other and unspecified psoriasis || id:finngen_R10_L12_PSORI_NAS	11	17070365	0.10171	2.34712e-06	252	Genus_Corynebacterium_Forehead_Sebaceous_PopGen || id:GCST90133202-1	2	TRUE	0.0848335	23.1743
rs78998127	T	A	T	A	0.675704	0.115587	0.906746	0.941602	FALSE	TRUE	FALSE	3	101611289	0.0696567	399474	0.0970398	Other and unspecified psoriasis || id:finngen_R10_L12_PSORI_NAS	3	101330133	0.14813	7.95983e-06	252	Genus_Corynebacterium_Forehead_Sebaceous_PopGen || id:GCST90133202-1	2	TRUE	0.0762729	20.6427
rs9887771	C	G	C	G	-0.469644	-0.0614383	0.775794	0.717096	FALSE	TRUE	FALSE	1	99811188	0.0361401	399474	0.0891313	Other and unspecified psoriasis || id:finngen_R10_L12_PSORI_NAS	1	100276744	0.103663	9.12111e-06	252	Genus_Corynebacterium_Forehead_Sebaceous_PopGen || id:GCST90133202-1	2	TRUE	0.0753158	20.3626
rs13050263	G	C	G	C	-0.464315	-0.00833867	0.743464	0.788992	FALSE	TRUE	FALSE	21	21292983	0.0400368	399474	0.835014	Other and unspecified psoriasis || id:finngen_R10_L12_PSORI_NAS	21	22665303	0.0873719	2.07572e-07	306	Genus_Corynebacterium_Retroauricularfold_Sebaceous_KORAFF4 || id:GCST90133202-2	2	TRUE	0.0844933	28.0566
rs16960676	C	T	C	T	-0.655785	0.0915212	0.91806	0.934968	FALSE	FALSE	FALSE	16	12786589	0.0664563	399474	0.168462	Other and unspecified psoriasis || id:finngen_R10_L12_PSORI_NAS	16	12880446	0.143977	7.66352e-06	299	Genus_Corynebacterium_Retroauricularfold_Sebaceous_KORAFF4 || id:GCST90133202-2	2	TRUE	0.064883	20.6073
rs28807761	G	A	G	A	-0.704745	0.0406423	0.92691	0.93323	FALSE	FALSE	FALSE	15	27396116	0.0648262	399474	0.530696	Other and unspecified psoriasis || id:finngen_R10_L12_PSORI_NAS	15	27641262	0.148021	3.00445e-06	301	Genus_Corynebacterium_Retroauricularfold_Sebaceous_KORAFF4 || id:GCST90133202-2	2	TRUE	0.0700352	22.5176
rs11235232	A	G	A	G	0.658933	0.0128434	0.793919	0.814702	FALSE	FALSE	FALSE	11	87615970	0.0421491	399474	0.760585	Other and unspecified psoriasis || id:finngen_R10_L12_PSORI_NAS	11	87326862	0.1408	6.49034e-06	148	Genus_Haemophilus_Dorsalforearm_Dry_PopGen || id:GCST90133219-1	2	TRUE	0.128909	21.6058
rs112384482	C	G	C	G	1.06141	-0.0366992	0.929054	0.890358	FALSE	TRUE	FALSE	2	24008950	0.0522919	399474	0.482795	Other and unspecified psoriasis || id:finngen_R10_L12_PSORI_NAS	2	24231820	0.218566	3.0456e-06	148	Genus_Haemophilus_Dorsalforearm_Dry_PopGen || id:GCST90133219-1	2	TRUE	0.137444	23.2643
rs149893292	G	A	G	A	-0.881281	0.0582098	0.908784	0.859844	FALSE	FALSE	FALSE	4	186248205	0.0472975	399474	0.218429	Other and unspecified psoriasis || id:finngen_R10_L12_PSORI_NAS	4	187169359	0.1903	7.98076e-06	148	Genus_Haemophilus_Dorsalforearm_Dry_PopGen || id:GCST90133219-1	2	TRUE	0.126566	21.1564
rs17562195	T	C	T	C	-1.41257	0.0180802	0.959459	0.924729	FALSE	FALSE	FALSE	1	197459299	0.0619211	399474	0.770295	Other and unspecified psoriasis || id:finngen_R10_L12_PSORI_NAS	1	197428429	0.277507	1.08496e-06	148	Genus_Haemophilus_Dorsalforearm_Dry_PopGen || id:GCST90133219-1	2	TRUE	0.148987	25.5603
rs2268390	C	T	C	T	0.642972	-0.114828	0.780405	0.771767	FALSE	FALSE	FALSE	12	109197472	0.0378917	399474	0.00244214	Other and unspecified psoriasis || id:finngen_R10_L12_PSORI_NAS	12	109635277	0.130334	2.17566e-06	148	Genus_Haemophilus_Dorsalforearm_Dry_PopGen || id:GCST90133219-1	2	TRUE	0.141218	24.0083
rs4705804	C	T	C	T	-0.57201	-0.02494	0.72973	0.698693	FALSE	FALSE	FALSE	5	113223073	0.0354561	399474	0.481805	Other and unspecified psoriasis || id:finngen_R10_L12_PSORI_NAS	5	112558770	0.124001	8.6098e-06	148	Genus_Haemophilus_Dorsalforearm_Dry_PopGen || id:GCST90133219-1	2	TRUE	0.125706	20.9918
rs6456465	A	G	A	G	0.831478	0.113308	0.875	0.850875	FALSE	FALSE	FALSE	6	22026688	0.0459338	399474	0.0136339	Other and unspecified psoriasis || id:finngen_R10_L12_PSORI_NAS	6	22026917	0.176909	5.95987e-06	148	Genus_Haemophilus_Dorsalforearm_Dry_PopGen || id:GCST90133219-1	2	TRUE	0.129873	21.7917
rs6765913	A	G	A	G	-0.637569	-0.00646083	0.831081	0.847526	FALSE	FALSE	FALSE	3	194473367	0.0454458	399474	0.886949	Other and unspecified psoriasis || id:finngen_R10_L12_PSORI_NAS	3	194194096	0.139221	9.903e-06	148	Genus_Haemophilus_Dorsalforearm_Dry_PopGen || id:GCST90133219-1	2	TRUE	0.124117	20.6889
rs7751	T	C	T	C	0.558338	-0.0168898	0.658784	0.711869	FALSE	FALSE	FALSE	22	17628665	0.0361375	399474	0.640231	Other and unspecified psoriasis || id:finngen_R10_L12_PSORI_NAS	22	18111431	0.120454	7.83786e-06	148	Genus_Haemophilus_Dorsalforearm_Dry_PopGen || id:GCST90133219-1	2	TRUE	0.126771	21.1956
rs10423922	T	A	T	A	-0.93297	0.00504598	0.915493	0.925914	FALSE	TRUE	FALSE	19	52500286	0.0620005	399474	0.935135	Other and unspecified psoriasis || id:finngen_R10_L12_PSORI_NAS	19	53003539	0.198939	6.42897e-06	142	Genus_Haemophilus_Volarforearm_Dry_PopGen || id:GCST90133219-2	2	TRUE	0.134112	21.6838
rs10484051	C	A	C	A	1.12672	0.00247276	0.933099	0.893914	FALSE	FALSE	FALSE	14	95502745	0.0531153	399474	0.962868	Other and unspecified psoriasis || id:finngen_R10_L12_PSORI_NAS	14	95969082	0.228015	2.18143e-06	142	Genus_Haemophilus_Volarforearm_Dry_PopGen || id:GCST90133219-2	2	TRUE	0.146725	24.0737
rs11209635	T	G	T	G	-1.00371	-0.0139701	0.901408	0.90569	FALSE	FALSE	FALSE	1	70548777	0.0557464	399474	0.802122	Other and unspecified psoriasis || id:finngen_R10_L12_PSORI_NAS	1	71014460	0.183999	2.15748e-07	142	Genus_Haemophilus_Volarforearm_Dry_PopGen || id:GCST90133219-2	2	TRUE	0.173249	29.3375
rs1123295	A	G	A	G	-0.504469	-0.0739767	0.552817	0.561878	FALSE	FALSE	FALSE	1	33444852	0.0328962	399474	0.0245262	Other and unspecified psoriasis || id:finngen_R10_L12_PSORI_NAS	1	33910453	0.108949	8.25323e-06	142	Genus_Haemophilus_Volarforearm_Dry_PopGen || id:GCST90133219-2	2	TRUE	0.131178	21.1378
rs11611443	C	A	C	A	-0.987741	-0.0131389	0.919014	0.939628	FALSE	FALSE	FALSE	12	1501858	0.068564	399474	0.848033	Other and unspecified psoriasis || id:finngen_R10_L12_PSORI_NAS	12	1611024	0.212524	7.67441e-06	142	Genus_Haemophilus_Volarforearm_Dry_PopGen || id:GCST90133219-2	2	TRUE	0.132033	21.2965
rs11894899	G	T	G	T	-0.797766	0.0204685	0.883803	0.845807	FALSE	FALSE	FALSE	2	1017608	0.045041	399474	0.649512	Other and unspecified psoriasis || id:finngen_R10_L12_PSORI_NAS	2	1013294	0.160009	1.79655e-06	142	Genus_Haemophilus_Volarforearm_Dry_PopGen || id:GCST90133219-2	2	TRUE	0.148975	24.5076
rs1204632	T	G	T	G	0.895515	-0.0542665	0.887324	0.9221	FALSE	FALSE	FALSE	20	22421780	0.0606615	399474	0.371012	Other and unspecified psoriasis || id:finngen_R10_L12_PSORI_NAS	20	22402418	0.186574	4.02585e-06	142	Genus_Haemophilus_Volarforearm_Dry_PopGen || id:GCST90133219-2	2	TRUE	0.139591	22.7133
rs12143770	T	C	T	C	0.531059	0.0270212	0.637324	0.615852	FALSE	FALSE	FALSE	1	18397443	0.0334867	399474	0.419712	Other and unspecified psoriasis || id:finngen_R10_L12_PSORI_NAS	1	18723937	0.114651	8.1963e-06	142	Genus_Haemophilus_Volarforearm_Dry_PopGen || id:GCST90133219-2	2	TRUE	0.13126	21.1529
rs1917949	T	C	T	C	-0.614193	0.0515098	0.75	0.788853	FALSE	FALSE	FALSE	2	234640696	0.0398308	399474	0.195936	Other and unspecified psoriasis || id:finngen_R10_L12_PSORI_NAS	2	235549340	0.132689	8.30488e-06	142	Genus_Haemophilus_Volarforearm_Dry_PopGen || id:GCST90133219-2	2	TRUE	0.131105	21.1242
rs202559	G	A	G	A	0.660291	0.0419367	0.799296	0.766475	FALSE	FALSE	FALSE	20	1781638	0.0387099	399474	0.278649	Other and unspecified psoriasis || id:finngen_R10_L12_PSORI_NAS	20	1762284	0.144027	9.99201e-06	142	Genus_Haemophilus_Volarforearm_Dry_PopGen || id:GCST90133219-2	2	TRUE	0.128928	20.7215
rs2076075	G	A	G	A	0.748718	0.086545	0.862676	0.880203	FALSE	FALSE	FALSE	1	186854152	0.0503923	399474	0.0859014	Other and unspecified psoriasis || id:finngen_R10_L12_PSORI_NAS	1	186823284	0.159068	5.97884e-06	142	Genus_Haemophilus_Volarforearm_Dry_PopGen || id:GCST90133219-2	2	TRUE	0.134964	21.8429
rs2496546	C	A	C	A	0.517021	0.00444643	0.619718	0.63224	FALSE	FALSE	FALSE	6	72124065	0.0338457	399474	0.89548	Other and unspecified psoriasis || id:finngen_R10_L12_PSORI_NAS	6	72833768	0.111692	8.29957e-06	142	Genus_Haemophilus_Volarforearm_Dry_PopGen || id:GCST90133219-2	2	TRUE	0.131113	21.1256
rs4072355	G	C	G	C	-0.793808	-0.0192704	0.820423	0.780944	FALSE	TRUE	FALSE	8	12737789	0.039522	399474	0.625842	Other and unspecified psoriasis || id:finngen_R10_L12_PSORI_NAS	8	12595298	0.146549	2.57588e-07	142	Genus_Haemophilus_Volarforearm_Dry_PopGen || id:GCST90133219-2	2	TRUE	0.17124	28.9271
rs4836877	A	C	A	C	-0.745611	0.0132226	0.823944	0.85171	FALSE	FALSE	FALSE	9	116843886	0.0457874	399474	0.772748	Other and unspecified psoriasis || id:finngen_R10_L12_PSORI_NAS	9	119606165	0.149003	1.65808e-06	142	Genus_Haemophilus_Volarforearm_Dry_PopGen || id:GCST90133219-2	2	TRUE	0.149904	24.6873
rs61882555	T	G	T	G	-0.668978	0.0563673	0.785211	0.796202	FALSE	FALSE	FALSE	11	79408195	0.0403491	399474	0.162416	Other and unspecified psoriasis || id:finngen_R10_L12_PSORI_NAS	11	79119239	0.138694	3.63755e-06	142	Genus_Haemophilus_Volarforearm_Dry_PopGen || id:GCST90133219-2	2	TRUE	0.140775	22.9375
rs7984030	T	C	T	C	-0.924438	-0.00559423	0.911972	0.904612	FALSE	FALSE	FALSE	13	44056284	0.0552315	399474	0.919323	Other and unspecified psoriasis || id:finngen_R10_L12_PSORI_NAS	13	44630420	0.186407	2.0178e-06	142	Genus_Haemophilus_Volarforearm_Dry_PopGen || id:GCST90133219-2	2	TRUE	0.147629	24.2478
rs111289765	C	T	C	T	0.408139	0.015166	0.662162	0.668493	FALSE	FALSE	FALSE	2	20402874	0.0345873	399474	0.661036	Other and unspecified psoriasis || id:finngen_R10_L12_PSORI_NAS	2	20602635	0.0849177	2.61815e-06	259	Genus_Staphylococcus_Dorsalforearm_Dry_PopGen || id:GCST90133223-1	2	TRUE	0.0818872	22.922
rs11206972	G	A	G	A	0.578449	0.0501378	0.841699	0.777872	FALSE	FALSE	FALSE	1	57100826	0.0394375	399474	0.203613	Other and unspecified psoriasis || id:finngen_R10_L12_PSORI_NAS	1	57566499	0.118411	1.82007e-06	259	Genus_Staphylococcus_Dorsalforearm_Dry_PopGen || id:GCST90133223-1	2	TRUE	0.0843657	23.6798
rs12206344	C	G	C	G	0.75434	-0.16071	0.920849	0.909354	FALSE	TRUE	FALSE	6	22245576	0.0541422	399474	0.00299454	Other and unspecified psoriasis || id:finngen_R10_L12_PSORI_NAS	6	22245805	0.159695	3.81533e-06	259	Genus_Staphylococcus_Dorsalforearm_Dry_PopGen || id:GCST90133223-1	2	TRUE	0.0793164	22.1404
rs12270027	G	A	G	A	0.477759	0.0760534	0.754826	0.822107	FALSE	FALSE	FALSE	11	129693528	0.0430046	399474	0.0769786	Other and unspecified psoriasis || id:finngen_R10_L12_PSORI_NAS	11	129563423	0.105144	8.50568e-06	259	Genus_Staphylococcus_Dorsalforearm_Dry_PopGen || id:GCST90133223-1	2	TRUE	0.0738306	20.487
rs12572683	A	G	A	G	-0.450042	-0.0224399	0.754826	0.690473	FALSE	FALSE	FALSE	10	7610458	0.0352735	399474	0.524667	Other and unspecified psoriasis || id:finngen_R10_L12_PSORI_NAS	10	7652421	0.0972715	5.89688e-06	259	Genus_Staphylococcus_Dorsalforearm_Dry_PopGen || id:GCST90133223-1	2	TRUE	0.0763391	21.2406
rs34323080	C	T	C	T	0.402286	0.00667448	0.683398	0.634719	FALSE	FALSE	FALSE	4	61844375	0.0338077	399474	0.843495	Other and unspecified psoriasis || id:finngen_R10_L12_PSORI_NAS	4	62710093	0.089077	9.60258e-06	259	Genus_Staphylococcus_Dorsalforearm_Dry_PopGen || id:GCST90133223-1	2	TRUE	0.0729993	20.2382
rs35541683	A	G	A	G	0.709757	0.0149583	0.916988	0.93098	FALSE	FALSE	FALSE	18	51667348	0.0647082	399474	0.817186	Other and unspecified psoriasis || id:finngen_R10_L12_PSORI_NAS	18	49193718	0.157376	9.86679e-06	259	Genus_Staphylococcus_Dorsalforearm_Dry_PopGen || id:GCST90133223-1	2	TRUE	0.0728132	20.1825
rs66498356	G	C	G	C	0.444924	-0.060791	0.675676	0.695896	FALSE	TRUE	FALSE	4	75935911	0.0353705	399474	0.0856702	Other and unspecified psoriasis || id:finngen_R10_L12_PSORI_NAS	4	76857064	0.0941521	3.78165e-06	259	Genus_Staphylococcus_Dorsalforearm_Dry_PopGen || id:GCST90133223-1	2	TRUE	0.0793769	22.1588
rs72695710	T	C	T	C	0.83742	0.087724	0.940154	0.88841	FALSE	FALSE	FALSE	4	165906118	0.0517769	399474	0.0902132	Other and unspecified psoriasis || id:finngen_R10_L12_PSORI_NAS	4	166827270	0.172081	1.98451e-06	259	Genus_Staphylococcus_Dorsalforearm_Dry_PopGen || id:GCST90133223-1	2	TRUE	0.0837765	23.4992
rs9592538	T	G	T	G	0.425857	-0.0306779	0.557915	0.536795	FALSE	FALSE	FALSE	13	67940392	0.0327617	399474	0.34907	Other and unspecified psoriasis || id:finngen_R10_L12_PSORI_NAS	13	68514524	0.0812362	3.31292e-07	259	Genus_Staphylococcus_Dorsalforearm_Dry_PopGen || id:GCST90133223-1	2	TRUE	0.0959251	27.2685
rs1539567	G	A	G	A	0.514454	-0.0332629	0.793173	0.873686	FALSE	FALSE	FALSE	9	127479887	0.0489495	399474	0.496799	Other and unspecified psoriasis || id:finngen_R10_L12_PSORI_NAS	9	130242166	0.110171	4.95738e-06	249	Genus_Staphylococcus_Volarforearm_Dry_PopGen || id:GCST90133223-2	2	TRUE	0.0805191	21.6298
rs1885482	T	A	T	A	0.596615	-0.0190716	0.831325	0.791869	FALSE	TRUE	FALSE	14	70013498	0.0400448	399474	0.63389	Other and unspecified psoriasis || id:finngen_R10_L12_PSORI_NAS	14	70480215	0.12004	1.25158e-06	249	Genus_Staphylococcus_Volarforearm_Dry_PopGen || id:GCST90133223-2	2	TRUE	0.0902516	24.5036
rs2560691	G	A	G	A	-0.523757	0.0772881	0.716867	0.759619	FALSE	FALSE	FALSE	5	116018886	0.0381722	399474	0.0428953	Other and unspecified psoriasis || id:finngen_R10_L12_PSORI_NAS	5	115354583	0.0974374	1.76891e-07	249	Genus_Staphylococcus_Volarforearm_Dry_PopGen || id:GCST90133223-2	2	TRUE	0.103975	28.6619
rs2832084	A	G	A	G	0.518166	-0.0131881	0.797189	0.784429	FALSE	FALSE	FALSE	21	28782476	0.0396664	399474	0.73953	Other and unspecified psoriasis || id:finngen_R10_L12_PSORI_NAS	21	30154798	0.113675	8.11652e-06	249	Genus_Staphylococcus_Volarforearm_Dry_PopGen || id:GCST90133223-2	2	TRUE	0.0770193	20.6112
rs2856330	T	C	T	C	0.653799	-0.0144603	0.889558	0.884609	FALSE	FALSE	FALSE	12	11789843	0.0527334	399474	0.78392	Other and unspecified psoriasis || id:finngen_R10_L12_PSORI_NAS	12	11942777	0.14074	5.52142e-06	249	Genus_Staphylococcus_Volarforearm_Dry_PopGen || id:GCST90133223-2	2	TRUE	0.0797547	21.4067
rs11579228	C	T	C	T	-0.514029	0.0527529	0.820463	0.84074	FALSE	FALSE	FALSE	1	211378536	0.0445949	399474	0.236835	Other and unspecified psoriasis || id:finngen_R10_L12_PSORI_NAS	1	211551878	0.112661	7.83167e-06	259	Genus_Corynebacterium_Dorsalforearm_Dry_PopGen || id:GCST90133224-1	2	TRUE	0.0743963	20.6566
rs1234358	C	T	C	T	-0.41987	-0.00709201	0.664093	0.770222	FALSE	FALSE	FALSE	7	150683943	0.0388469	399474	0.855141	Other and unspecified psoriasis || id:finngen_R10_L12_PSORI_NAS	7	150381031	0.0899336	4.88744e-06	259	Genus_Corynebacterium_Dorsalforearm_Dry_PopGen || id:GCST90133224-1	2	TRUE	0.0776236	21.6281
rs12436788	G	A	G	A	-0.635006	0.0270651	0.889961	0.884158	FALSE	FALSE	FALSE	14	48309571	0.0511432	399474	0.596666	Other and unspecified psoriasis || id:finngen_R10_L12_PSORI_NAS	14	48778774	0.130295	1.9197e-06	259	Genus_Corynebacterium_Dorsalforearm_Dry_PopGen || id:GCST90133224-1	2	TRUE	0.0840027	23.5685
rs13362349	A	G	A	G	-0.514554	-0.0466629	0.77027	0.674824	FALSE	FALSE	FALSE	5	71737765	0.0351964	399474	0.18491	Other and unspecified psoriasis || id:finngen_R10_L12_PSORI_NAS	5	71033592	0.106007	2.10214e-06	259	Genus_Corynebacterium_Dorsalforearm_Dry_PopGen || id:GCST90133224-1	2	TRUE	0.083384	23.3791
rs149821435	G	A	G	A	-0.564657	-0.063733	0.837838	0.846783	FALSE	FALSE	FALSE	8	102511288	0.0453061	399474	0.15951	Other and unspecified psoriasis || id:finngen_R10_L12_PSORI_NAS	8	103523516	0.115964	1.95897e-06	259	Genus_Corynebacterium_Dorsalforearm_Dry_PopGen || id:GCST90133224-1	2	TRUE	0.0838647	23.5263
rs17375837	A	G	A	G	-0.874612	-0.0707452	0.942085	0.955222	FALSE	FALSE	FALSE	3	123946165	0.0791683	399474	0.371534	Other and unspecified psoriasis || id:finngen_R10_L12_PSORI_NAS	3	123665012	0.187344	4.89161e-06	259	Genus_Corynebacterium_Dorsalforearm_Dry_PopGen || id:GCST90133224-1	2	TRUE	0.0776178	21.6264
rs17617684	G	T	G	T	-0.415187	-0.0182385	0.604247	0.589474	FALSE	FALSE	FALSE	17	14230033	0.0330111	399474	0.580608	Other and unspecified psoriasis || id:finngen_R10_L12_PSORI_NAS	17	14133350	0.0893321	5.36888e-06	259	Genus_Corynebacterium_Dorsalforearm_Dry_PopGen || id:GCST90133224-1	2	TRUE	0.076981	21.4341
rs6774189	A	G	A	G	0.767721	0.157239	0.928571	0.937883	FALSE	FALSE	FALSE	3	46551040	0.0677758	399474	0.0203418	Other and unspecified psoriasis || id:finngen_R10_L12_PSORI_NAS	3	46592530	0.161197	3.19639e-06	259	Genus_Corynebacterium_Dorsalforearm_Dry_PopGen || id:GCST90133224-1	2	TRUE	0.0805253	22.5074
rs7028802	C	T	C	T	0.630452	0.0232876	0.888031	0.920576	FALSE	FALSE	FALSE	9	390228	0.0605782	399474	0.700666	Other and unspecified psoriasis || id:finngen_R10_L12_PSORI_NAS	9	390228	0.135098	4.932e-06	259	Genus_Corynebacterium_Dorsalforearm_Dry_PopGen || id:GCST90133224-1	2	TRUE	0.0775615	21.6094
rs72826444	C	T	C	T	0.83598	0.0521624	0.938224	0.923759	FALSE	FALSE	FALSE	17	51123012	0.0618688	399474	0.399165	Other and unspecified psoriasis || id:finngen_R10_L12_PSORI_NAS	17	49200373	0.182455	7.19424e-06	259	Genus_Corynebacterium_Dorsalforearm_Dry_PopGen || id:GCST90133224-1	2	TRUE	0.0749777	20.8312
rs1100150	A	G	A	G	0.649269	0.0170071	0.888	0.84372	FALSE	FALSE	FALSE	7	12398078	0.0448542	399474	0.704567	Other and unspecified psoriasis || id:finngen_R10_L12_PSORI_NAS	7	12437704	0.139833	5.56727e-06	250	Genus_Corynebacterium_Volarforearm_Dry_PopGen || id:GCST90133224-2	2	TRUE	0.0793895	21.3864
rs11059855	C	T	C	T	-0.420798	0.0213818	0.694	0.732409	FALSE	FALSE	FALSE	12	128725565	0.0369319	399474	0.562622	Other and unspecified psoriasis || id:finngen_R10_L12_PSORI_NAS	12	129210110	0.0931672	9.72498e-06	250	Genus_Corynebacterium_Volarforearm_Dry_PopGen || id:GCST90133224-2	2	TRUE	0.0754423	20.2364
rs12873717	G	A	G	A	0.511774	0.026083	0.76	0.713586	FALSE	FALSE	FALSE	13	110569482	0.0360672	399474	0.46957	Other and unspecified psoriasis || id:finngen_R10_L12_PSORI_NAS	13	111221829	0.104374	1.70575e-06	250	Genus_Corynebacterium_Volarforearm_Dry_PopGen || id:GCST90133224-2	2	TRUE	0.0877306	23.8495
rs340202	A	C	A	C	0.505236	0.00515683	0.72	0.676263	FALSE	FALSE	FALSE	4	85432643	0.0349257	399474	0.882618	Other and unspecified psoriasis || id:finngen_R10_L12_PSORI_NAS	4	86353796	0.102393	1.4764e-06	250	Genus_Corynebacterium_Volarforearm_Dry_PopGen || id:GCST90133224-2	2	TRUE	0.0887457	24.1524
rs3847320	G	A	G	A	0.448337	0.0557241	0.73	0.690631	FALSE	FALSE	FALSE	9	134041630	0.0352855	399474	0.114283	Other and unspecified psoriasis || id:finngen_R10_L12_PSORI_NAS	9	136906752	0.0962566	5.2172e-06	250	Genus_Corynebacterium_Volarforearm_Dry_PopGen || id:GCST90133224-2	2	TRUE	0.0798485	21.5208
rs57778164	T	C	T	C	-0.507266	0.00550479	0.732	0.723282	FALSE	FALSE	FALSE	16	56643722	0.0364762	399474	0.880043	Other and unspecified psoriasis || id:finngen_R10_L12_PSORI_NAS	16	56677634	0.0972078	3.81465e-07	250	Genus_Corynebacterium_Volarforearm_Dry_PopGen || id:GCST90133224-2	2	TRUE	0.0982262	27.0135
rs6731937	T	C	T	C	-0.389835	0.0103548	0.574	0.550672	FALSE	FALSE	FALSE	2	120426644	0.0327416	399474	0.751806	Other and unspecified psoriasis || id:finngen_R10_L12_PSORI_NAS	2	121184220	0.0847002	6.66759e-06	250	Genus_Corynebacterium_Volarforearm_Dry_PopGen || id:GCST90133224-2	2	TRUE	0.0781141	21.0138
rs7238445	G	A	G	A	0.504547	-0.028591	0.794	0.738142	FALSE	FALSE	FALSE	18	52255174	0.0371723	399474	0.441806	Other and unspecified psoriasis || id:finngen_R10_L12_PSORI_NAS	18	49781544	0.110212	7.43129e-06	250	Genus_Corynebacterium_Volarforearm_Dry_PopGen || id:GCST90133224-2	2	TRUE	0.0773469	20.7901
rs73227985	G	A	G	A	-0.696605	-0.0673614	0.9	0.853606	FALSE	FALSE	FALSE	13	75818397	0.046193	399474	0.144769	Other and unspecified psoriasis || id:finngen_R10_L12_PSORI_NAS	13	76392533	0.152506	7.77409e-06	250	Genus_Corynebacterium_Volarforearm_Dry_PopGen || id:GCST90133224-2	2	TRUE	0.0770277	20.6971
rs8076452	C	T	C	T	-0.540331	-0.029296	0.832	0.831885	FALSE	FALSE	FALSE	17	17596340	0.0436101	399474	0.50173	Other and unspecified psoriasis || id:finngen_R10_L12_PSORI_NAS	17	17499654	0.118981	8.72875e-06	250	Genus_Corynebacterium_Volarforearm_Dry_PopGen || id:GCST90133224-2	2	TRUE	0.0762077	20.4586
rs876400	C	T	C	T	-0.501821	-0.0741294	0.682	0.740449	FALSE	FALSE	FALSE	9	78219983	0.0372258	399474	0.046443	Other and unspecified psoriasis || id:finngen_R10_L12_PSORI_NAS	9	80834899	0.0912914	9.58792e-08	250	Genus_Corynebacterium_Volarforearm_Dry_PopGen || id:GCST90133224-2	2	TRUE	0.107831	29.9743
rs10846578	C	T	C	T	0.522194	-0.00615433	0.666667	0.654078	FALSE	FALSE	FALSE	12	123915731	0.0344468	399474	0.858203	Other and unspecified psoriasis || id:finngen_R10_L12_PSORI_NAS	12	124400278	0.111864	6.23645e-06	168	Genus_Bacteroides_Dorsalforearm_Dry_PopGen || id:GCST90133229-1	2	TRUE	0.114818	21.5321
rs112990712	T	C	T	C	-0.816386	0.0265855	0.907738	0.888464	FALSE	FALSE	FALSE	1	163089055	0.0515851	399474	0.606294	Other and unspecified psoriasis || id:finngen_R10_L12_PSORI_NAS	1	163058845	0.171774	4.32578e-06	168	Genus_Bacteroides_Dorsalforearm_Dry_PopGen || id:GCST90133229-1	2	TRUE	0.118518	22.3191
rs1891661	A	G	A	G	0.541614	0.0214786	0.633929	0.629865	FALSE	FALSE	FALSE	1	210812668	0.0337729	399474	0.524795	Other and unspecified psoriasis || id:finngen_R10_L12_PSORI_NAS	1	210986010	0.10985	1.97543e-06	168	Genus_Bacteroides_Dorsalforearm_Dry_PopGen || id:GCST90133229-1	2	TRUE	0.126408	24.0201
rs34885890	G	A	G	A	-0.974744	0.0147051	0.925595	0.910394	FALSE	FALSE	FALSE	4	2387668	0.0569212	399474	0.796143	Other and unspecified psoriasis || id:finngen_R10_L12_PSORI_NAS	4	2389395	0.190885	8.92166e-07	168	Genus_Bacteroides_Dorsalforearm_Dry_PopGen || id:GCST90133229-1	2	TRUE	0.134359	25.7654
rs4492732	A	G	A	G	-1.08325	0.00026512	0.943452	0.939986	FALSE	FALSE	FALSE	10	120613346	0.0685794	399474	0.996915	Other and unspecified psoriasis || id:finngen_R10_L12_PSORI_NAS	10	122372858	0.226221	3.7001e-06	168	Genus_Bacteroides_Dorsalforearm_Dry_PopGen || id:GCST90133229-1	2	TRUE	0.120094	22.6566
rs55702239	G	A	G	A	-0.599683	-0.00698237	0.75	0.736873	FALSE	FALSE	FALSE	4	54191582	0.0370831	399474	0.85065	Other and unspecified psoriasis || id:finngen_R10_L12_PSORI_NAS	4	55057749	0.103672	3.53155e-08	168	Genus_Bacteroides_Dorsalforearm_Dry_PopGen || id:GCST90133229-1	2	TRUE	0.166085	33.061
rs567637	A	G	A	G	-0.50942	0.0607643	0.598214	0.570362	FALSE	FALSE	FALSE	16	84500760	0.0329634	399474	0.0652725	Other and unspecified psoriasis || id:finngen_R10_L12_PSORI_NAS	16	84534366	0.10774	4.81074e-06	168	Genus_Bacteroides_Dorsalforearm_Dry_PopGen || id:GCST90133229-1	2	TRUE	0.117444	22.0901
rs62043393	G	T	G	T	-1.02423	-0.0810596	0.940476	0.976266	FALSE	FALSE	FALSE	16	87004603	0.10703	399474	0.44884	Other and unspecified psoriasis || id:finngen_R10_L12_PSORI_NAS	16	87038209	0.222231	8.03886e-06	168	Genus_Bacteroides_Dorsalforearm_Dry_PopGen || id:GCST90133229-1	2	TRUE	0.112244	20.9884
rs6951622	C	G	C	G	-0.55053	-0.00912732	0.723214	0.676094	FALSE	TRUE	FALSE	7	148429882	0.0350223	399474	0.79439	Other and unspecified psoriasis || id:finngen_R10_L12_PSORI_NAS	7	148126974	0.116732	5.06879e-06	168	Genus_Bacteroides_Dorsalforearm_Dry_PopGen || id:GCST90133229-1	2	TRUE	0.116916	21.9775
rs73231219	T	C	T	C	0.735643	-0.0071114	0.857143	0.943349	FALSE	FALSE	FALSE	3	140470530	0.0702767	399474	0.919399	Other and unspecified psoriasis || id:finngen_R10_L12_PSORI_NAS	3	140189372	0.133959	1.47038e-07	168	Genus_Bacteroides_Dorsalforearm_Dry_PopGen || id:GCST90133229-1	2	TRUE	0.152188	29.7982
rs10786219	G	T	G	T	0.476433	-0.0543192	0.607735	0.674208	FALSE	FALSE	FALSE	10	95543030	0.0349385	399474	0.120015	Other and unspecified psoriasis || id:finngen_R10_L12_PSORI_NAS	10	97302787	0.103438	7.769e-06	181	Genus_Bacteroides_Volarforearm_Dry_PopGen || id:GCST90133229-2	2	TRUE	0.104914	20.9808
rs112758501	C	T	C	T	0.734544	-0.021728	0.900552	0.942112	FALSE	FALSE	FALSE	2	52244531	0.0708521	399474	0.759097	Other and unspecified psoriasis || id:finngen_R10_L12_PSORI_NAS	2	52471669	0.159241	7.54554e-06	181	Genus_Bacteroides_Volarforearm_Dry_PopGen || id:GCST90133229-2	2	TRUE	0.105191	21.0427
rs112882319	C	T	C	T	-0.885855	-0.0203552	0.917127	0.89052	FALSE	FALSE	FALSE	2	49198190	0.0520087	399474	0.695516	Other and unspecified psoriasis || id:finngen_R10_L12_PSORI_NAS	2	49425329	0.179412	1.80422e-06	181	Genus_Bacteroides_Volarforearm_Dry_PopGen || id:GCST90133229-2	2	TRUE	0.118704	24.11
rs11701158	G	A	G	A	-0.559623	0.0336686	0.734807	0.69837	FALSE	FALSE	FALSE	21	42941303	0.035682	399474	0.345387	Other and unspecified psoriasis || id:finngen_R10_L12_PSORI_NAS	21	44361413	0.108516	6.604e-07	181	Genus_Bacteroides_Volarforearm_Dry_PopGen || id:GCST90133229-2	2	TRUE	0.128111	26.3014
rs1391569	A	T	A	T	-0.526073	-0.0379152	0.767956	0.725246	FALSE	TRUE	FALSE	15	37708332	0.0364733	399474	0.298557	Other and unspecified psoriasis || id:finngen_R10_L12_PSORI_NAS	15	38000533	0.113031	6.31076e-06	181	Genus_Bacteroides_Volarforearm_Dry_PopGen || id:GCST90133229-2	2	TRUE	0.106886	21.4224
rs1429955	T	C	T	C	-0.476523	-0.0510037	0.588398	0.630735	FALSE	FALSE	FALSE	8	40504108	0.0337598	399474	0.130844	Other and unspecified psoriasis || id:finngen_R10_L12_PSORI_NAS	8	40361627	0.0996016	3.57471e-06	181	Genus_Bacteroides_Volarforearm_Dry_PopGen || id:GCST90133229-2	2	TRUE	0.112264	22.6365
rs145438026	C	T	C	T	-0.918342	0.107782	0.928177	0.967264	FALSE	FALSE	FALSE	2	156371743	0.0918877	399474	0.240805	Other and unspecified psoriasis || id:finngen_R10_L12_PSORI_NAS	2	157228255	0.199208	7.63777e-06	181	Genus_Bacteroides_Volarforearm_Dry_PopGen || id:GCST90133229-2	2	TRUE	0.105076	21.017
rs17004734	A	G	A	G	-0.705987	0.0212839	0.853591	0.858889	FALSE	FALSE	FALSE	21	45101543	0.0472853	399474	0.652625	Other and unspecified psoriasis || id:finngen_R10_L12_PSORI_NAS	21	46521458	0.141241	1.36932e-06	181	Genus_Bacteroides_Volarforearm_Dry_PopGen || id:GCST90133229-2	2	TRUE	0.121293	24.7084
rs1883628	C	T	C	T	-0.795622	-0.00975746	0.906077	0.929519	FALSE	FALSE	FALSE	6	1058079	0.0642045	399474	0.879207	Other and unspecified psoriasis || id:finngen_R10_L12_PSORI_NAS	6	1058314	0.172751	7.7823e-06	181	Genus_Bacteroides_Volarforearm_Dry_PopGen || id:GCST90133229-2	2	TRUE	0.104898	20.9772
rs283819	C	A	C	A	-0.543768	0.0287637	0.790055	0.813208	FALSE	FALSE	FALSE	2	79000117	0.0418825	399474	0.492227	Other and unspecified psoriasis || id:finngen_R10_L12_PSORI_NAS	2	79227243	0.115347	4.86238e-06	181	Genus_Bacteroides_Volarforearm_Dry_PopGen || id:GCST90133229-2	2	TRUE	0.109356	21.9781
rs342701	C	T	C	T	-0.56591	0.00739878	0.790055	0.783277	FALSE	FALSE	FALSE	13	91773603	0.0395657	399474	0.85166	Other and unspecified psoriasis || id:finngen_R10_L12_PSORI_NAS	13	92425857	0.121083	5.79905e-06	181	Genus_Bacteroides_Volarforearm_Dry_PopGen || id:GCST90133229-2	2	TRUE	0.107688	21.6024
rs34435660	C	T	C	T	-0.662063	0.0231536	0.859116	0.832262	FALSE	FALSE	FALSE	21	20340720	0.0436514	399474	0.59582	Other and unspecified psoriasis || id:finngen_R10_L12_PSORI_NAS	21	21713032	0.140355	4.80174e-06	181	Genus_Bacteroides_Volarforearm_Dry_PopGen || id:GCST90133229-2	2	TRUE	0.109475	22.0049
rs75565556	A	G	A	G	1.09046	-0.0686096	0.950276	0.980497	FALSE	FALSE	FALSE	18	69156817	0.118795	399474	0.56357	Other and unspecified psoriasis || id:finngen_R10_L12_PSORI_NAS	18	66824054	0.233101	5.69093e-06	181	Genus_Bacteroides_Volarforearm_Dry_PopGen || id:GCST90133229-2	2	TRUE	0.107866	21.6425
rs78751417	C	T	C	T	0.768527	-0.0633644	0.89779	0.928357	FALSE	FALSE	FALSE	6	43836565	0.0629939	399474	0.314473	Other and unspecified psoriasis || id:finngen_R10_L12_PSORI_NAS	6	43804302	0.167761	8.64489e-06	181	Genus_Bacteroides_Volarforearm_Dry_PopGen || id:GCST90133229-2	2	TRUE	0.1039	20.7544
rs8077283	T	C	T	C	-0.678809	-0.000912764	0.848066	0.857023	FALSE	FALSE	FALSE	17	10059955	0.0464051	399474	0.984307	Other and unspecified psoriasis || id:finngen_R10_L12_PSORI_NAS	17	9963272	0.144225	5.02655e-06	181	Genus_Bacteroides_Volarforearm_Dry_PopGen || id:GCST90133229-2	2	TRUE	0.109042	21.9072
rs10860026	G	A	G	A	0.745665	0.0031242	0.875723	0.87337	FALSE	FALSE	FALSE	12	96369471	0.049422	399474	0.949596	Other and unspecified psoriasis || id:finngen_R10_L12_PSORI_NAS	12	96763249	0.155184	3.36808e-06	173	Genus_Anaerococcus_Dorsalforearm_Dry_PopGen || id:GCST90133230-1	2	TRUE	0.117744	22.8214
rs10937638	T	C	T	C	-0.650538	-0.00479067	0.82948	0.798666	FALSE	FALSE	FALSE	4	5375515	0.040545	399474	0.905943	Other and unspecified psoriasis || id:finngen_R10_L12_PSORI_NAS	4	5377242	0.13674	4.14916e-06	173	Genus_Anaerococcus_Dorsalforearm_Dry_PopGen || id:GCST90133230-1	2	TRUE	0.115694	22.372
rs114158060	A	G	A	G	0.84523	-0.0262279	0.904624	0.94123	FALSE	FALSE	FALSE	6	89551396	0.0692005	399474	0.704678	Other and unspecified psoriasis || id:finngen_R10_L12_PSORI_NAS	6	90261115	0.181628	6.51113e-06	173	Genus_Anaerococcus_Dorsalforearm_Dry_PopGen || id:GCST90133230-1	2	TRUE	0.111254	21.4059
rs11818509	C	T	C	T	-0.76904	-0.00840666	0.884393	0.919531	FALSE	FALSE	FALSE	10	2837817	0.0596869	399474	0.887991	Other and unspecified psoriasis || id:finngen_R10_L12_PSORI_NAS	10	2880009	0.16385	5.47967e-06	173	Genus_Anaerococcus_Dorsalforearm_Dry_PopGen || id:GCST90133230-1	2	TRUE	0.112955	21.7749
rs12956696	C	G	C	G	-1.08454	-0.116007	0.942197	0.943541	FALSE	TRUE	FALSE	18	39054262	0.070539	399474	0.100058	Other and unspecified psoriasis || id:finngen_R10_L12_PSORI_NAS	18	36634226	0.221892	2.33583e-06	173	Genus_Anaerococcus_Dorsalforearm_Dry_PopGen || id:GCST90133230-1	2	TRUE	0.121334	23.6133
rs1403026	A	G	A	G	-0.740491	0.00688658	0.869942	0.923284	FALSE	FALSE	FALSE	3	149826153	0.0611729	399474	0.910367	Other and unspecified psoriasis || id:finngen_R10_L12_PSORI_NAS	3	149543940	0.1485	1.49988e-06	173	Genus_Anaerococcus_Dorsalforearm_Dry_PopGen || id:GCST90133230-1	2	TRUE	0.125666	24.5774
rs16875319	T	G	T	G	-0.792044	-0.0289077	0.872832	0.831956	FALSE	FALSE	FALSE	5	5319294	0.0442215	399474	0.513303	Other and unspecified psoriasis || id:finngen_R10_L12_PSORI_NAS	5	5319407	0.15263	5.92758e-07	173	Genus_Anaerococcus_Dorsalforearm_Dry_PopGen || id:GCST90133230-1	2	TRUE	0.134692	26.6176
rs1908208	A	C	A	C	-0.494847	-0.0533854	0.635838	0.556148	FALSE	FALSE	FALSE	16	19881414	0.032764	399474	0.103229	Other and unspecified psoriasis || id:finngen_R10_L12_PSORI_NAS	16	19892736	0.107648	8.30397e-06	173	Genus_Anaerococcus_Dorsalforearm_Dry_PopGen || id:GCST90133230-1	2	TRUE	0.108851	20.8871
rs2358910	G	T	G	T	-0.457761	0.0288549	0.523121	0.479788	FALSE	FALSE	FALSE	4	148753595	0.0326818	399474	0.377288	Other and unspecified psoriasis || id:finngen_R10_L12_PSORI_NAS	4	149674747	0.100504	9.93864e-06	173	Genus_Anaerococcus_Dorsalforearm_Dry_PopGen || id:GCST90133230-1	2	TRUE	0.107073	20.505
rs4318543	A	T	A	T	0.50086	-0.102522	0.699422	0.715415	FALSE	TRUE	FALSE	3	4912971	0.0354713	399474	0.0038492	Other and unspecified psoriasis || id:finngen_R10_L12_PSORI_NAS	3	4954656	0.108087	7.08846e-06	173	Genus_Anaerococcus_Dorsalforearm_Dry_PopGen || id:GCST90133230-1	2	TRUE	0.110415	21.2244
rs4997807	C	T	C	T	0.455842	0.0270218	0.578035	0.587835	FALSE	FALSE	FALSE	7	156365978	0.033146	399474	0.414937	Other and unspecified psoriasis || id:finngen_R10_L12_PSORI_NAS	7	156158672	0.098578	7.38901e-06	173	Genus_Anaerococcus_Dorsalforearm_Dry_PopGen || id:GCST90133230-1	2	TRUE	0.110005	21.1358
rs56214776	G	A	G	A	-0.688283	-0.0451699	0.869942	0.898931	FALSE	FALSE	FALSE	16	78011892	0.054004	399474	0.40292	Other and unspecified psoriasis || id:finngen_R10_L12_PSORI_NAS	16	78045789	0.149962	8.56161e-06	173	Genus_Anaerococcus_Dorsalforearm_Dry_PopGen || id:GCST90133230-1	2	TRUE	0.108549	20.822
rs6474615	T	C	T	C	-0.472202	0.00333306	0.65896	0.645528	FALSE	FALSE	FALSE	9	11024277	0.0340482	399474	0.922018	Other and unspecified psoriasis || id:finngen_R10_L12_PSORI_NAS	9	11024277	0.102863	8.52949e-06	173	Genus_Anaerococcus_Dorsalforearm_Dry_PopGen || id:GCST90133230-1	2	TRUE	0.108586	20.83
rs6586815	G	C	G	C	-0.751455	0.0820853	0.852601	0.853755	FALSE	TRUE	FALSE	8	16424002	0.0462106	399474	0.0756781	Other and unspecified psoriasis || id:finngen_R10_L12_PSORI_NAS	8	16281511	0.151133	1.59994e-06	173	Genus_Anaerococcus_Dorsalforearm_Dry_PopGen || id:GCST90133230-1	2	TRUE	0.125035	24.4364
rs73888313	C	T	C	T	-0.873208	-0.136807	0.924855	0.925154	FALSE	FALSE	FALSE	22	42453192	0.0618599	399474	0.0269967	Other and unspecified psoriasis || id:finngen_R10_L12_PSORI_NAS	22	42849198	0.191672	9.89277e-06	173	Genus_Anaerococcus_Dorsalforearm_Dry_PopGen || id:GCST90133230-1	2	TRUE	0.107119	20.5148
rs7908505	A	G	A	G	0.448603	0.0140961	0.638728	0.562069	FALSE	FALSE	FALSE	10	82921307	0.0329206	399474	0.668518	Other and unspecified psoriasis || id:finngen_R10_L12_PSORI_NAS	10	84681063	0.0976333	8.3792e-06	173	Genus_Anaerococcus_Dorsalforearm_Dry_PopGen || id:GCST90133230-1	2	TRUE	0.108762	20.8678
rs838553	G	C	G	C	-0.489965	0.0478896	0.644509	0.630983	FALSE	TRUE	FALSE	2	233513464	0.0337877	399474	0.156376	Other and unspecified psoriasis || id:finngen_R10_L12_PSORI_NAS	2	234422110	0.103765	4.84651e-06	173	Genus_Anaerococcus_Dorsalforearm_Dry_PopGen || id:GCST90133230-1	2	TRUE	0.114165	22.0382
rs9370504	A	G	A	G	-0.501065	0.01516	0.67052	0.667683	FALSE	FALSE	FALSE	6	56285233	0.0346883	399474	0.662087	Other and unspecified psoriasis || id:finngen_R10_L12_PSORI_NAS	6	56150031	0.106969	5.70591e-06	173	Genus_Anaerococcus_Dorsalforearm_Dry_PopGen || id:GCST90133230-1	2	TRUE	0.112556	21.6882
rs9484795	T	C	T	C	-0.741571	0.0081115	0.783237	0.793782	FALSE	FALSE	FALSE	6	143700903	0.0401731	399474	0.839984	Other and unspecified psoriasis || id:finngen_R10_L12_PSORI_NAS	6	144022040	0.128234	3.41412e-08	173	Genus_Anaerococcus_Dorsalforearm_Dry_PopGen || id:GCST90133230-1	2	TRUE	0.161994	33.0558
rs1965662	C	T	C	T	0.534579	0.0189913	0.751397	0.669131	FALSE	FALSE	FALSE	18	54818849	0.0345732	399474	0.582795	Other and unspecified psoriasis || id:finngen_R10_L12_PSORI_NAS	18	52486080	0.117279	9.59475e-06	179	Genus_Anaerococcus_Volarforearm_Dry_PopGen || id:GCST90133230-2	2	TRUE	0.104001	20.5449
rs6516034	G	A	G	A	0.481893	-0.0632928	0.539106	0.496412	FALSE	FALSE	FALSE	20	5433900	0.0328044	399474	0.0536809	Other and unspecified psoriasis || id:finngen_R10_L12_PSORI_NAS	20	5414546	0.104823	8.12105e-06	179	Genus_Anaerococcus_Volarforearm_Dry_PopGen || id:GCST90133230-2	2	TRUE	0.105601	20.8983
rs7307114	C	A	C	A	-0.599659	-0.0749508	0.804469	0.792495	FALSE	FALSE	FALSE	12	26701016	0.0401559	399474	0.0619726	Other and unspecified psoriasis || id:finngen_R10_L12_PSORI_NAS	12	26853949	0.124667	3.21459e-06	179	Genus_Anaerococcus_Volarforearm_Dry_PopGen || id:GCST90133230-2	2	TRUE	0.114461	22.8783
rs9310238	T	C	T	C	-0.444738	0.0435917	0.5	0.488953	FALSE	FALSE	FALSE	3	72259375	0.0326377	399474	0.181673	Other and unspecified psoriasis || id:finngen_R10_L12_PSORI_NAS	3	72308526	0.0950618	5.72279e-06	179	Genus_Anaerococcus_Volarforearm_Dry_PopGen || id:GCST90133230-2	2	TRUE	0.108954	21.643
rs11055251	A	C	A	C	0.54369	0.00804572	0.753061	0.629525	FALSE	FALSE	FALSE	12	13138092	0.0338278	399474	0.812003	Other and unspecified psoriasis || id:finngen_R10_L12_PSORI_NAS	12	13291026	0.10589	5.80034e-07	245	Genus_Enhydrobacter_Dorsalforearm_Dry_PopGen || id:GCST90133231-1	2	TRUE	0.0971498	26.1477
rs112065281	T	C	T	C	-0.506991	-0.0200746	0.834694	0.816759	FALSE	FALSE	FALSE	18	51646911	0.0421677	399474	0.634027	Other and unspecified psoriasis || id:finngen_R10_L12_PSORI_NAS	18	49173281	0.108922	5.33992e-06	245	Genus_Enhydrobacter_Dorsalforearm_Dry_PopGen || id:GCST90133231-1	2	TRUE	0.0812467	21.4888
rs11791149	T	C	T	C	-0.510922	0.0126205	0.816327	0.838633	FALSE	FALSE	FALSE	9	130629522	0.0444299	399474	0.776369	Other and unspecified psoriasis || id:finngen_R10_L12_PSORI_NAS	9	133504909	0.111485	7.33733e-06	245	Genus_Enhydrobacter_Dorsalforearm_Dry_PopGen || id:GCST90133231-1	2	TRUE	0.0789573	20.8314
rs434474	T	A	T	A	-0.454843	0.0329988	0.689796	0.696222	FALSE	TRUE	FALSE	1	4754057	0.0354232	399474	0.351564	Other and unspecified psoriasis || id:finngen_R10_L12_PSORI_NAS	1	4814117	0.0920145	1.43327e-06	245	Genus_Enhydrobacter_Dorsalforearm_Dry_PopGen || id:GCST90133231-1	2	TRUE	0.0906894	24.2354
rs434474	T	A	T	A	-0.454843	0.0329988	0.689796	0.696222	FALSE	TRUE	FALSE	1	4754057	0.0354232	399474	0.351564	Other and unspecified psoriasis || id:finngen_R10_L12_PSORI_NAS	1	4814117	0.0920145	1.43327e-06	245	Genus_Enhydrobacter_Dorsalforearm_Dry_PopGen || id:GCST90133231-1	2	TRUE	0.0906894	24.2354
rs55806473	A	T	A	T	-0.430967	-0.044251	0.691837	0.653591	FALSE	TRUE	FALSE	16	5409039	0.0343982	399474	0.198291	Other and unspecified psoriasis || id:finngen_R10_L12_PSORI_NAS	16	5459040	0.0847501	7.342e-07	245	Genus_Enhydrobacter_Dorsalforearm_Dry_PopGen || id:GCST90133231-1	2	TRUE	0.0954695	25.6476
rs62257654	T	C	T	C	-0.561559	-0.00176757	0.814286	0.818755	FALSE	FALSE	FALSE	3	4043892	0.0423563	399474	0.966713	Other and unspecified psoriasis || id:finngen_R10_L12_PSORI_NAS	3	4085576	0.108625	4.89642e-07	245	Genus_Enhydrobacter_Dorsalforearm_Dry_PopGen || id:GCST90133231-1	2	TRUE	0.0983564	26.5078
rs12117900	C	G	C	G	-0.678651	-0.0575997	0.896996	0.835766	FALSE	TRUE	FALSE	1	210432546	0.0439358	399474	0.189859	Other and unspecified psoriasis || id:finngen_R10_L12_PSORI_NAS	1	210605890	0.142493	3.37395e-06	233	Genus_Enhydrobacter_Volarforearm_Dry_PopGen || id:GCST90133231-2	2	TRUE	0.0887168	22.4887
rs12586414	G	T	G	T	-0.517588	0.00268115	0.798283	0.735462	FALSE	FALSE	FALSE	14	100837902	0.0369065	399474	0.942087	Other and unspecified psoriasis || id:finngen_R10_L12_PSORI_NAS	14	101304239	0.105467	1.74193e-06	233	Genus_Enhydrobacter_Volarforearm_Dry_PopGen || id:GCST90133231-2	2	TRUE	0.0936821	23.8775
rs12965141	G	C	G	C	-0.472953	0.0545384	0.770386	0.745005	FALSE	TRUE	FALSE	18	43815744	0.0375325	399474	0.146197	Other and unspecified psoriasis || id:finngen_R10_L12_PSORI_NAS	18	41395709	0.103732	8.32246e-06	233	Genus_Enhydrobacter_Volarforearm_Dry_PopGen || id:GCST90133231-2	2	TRUE	0.0819102	20.6094
rs1334751	T	C	T	C	0.595221	-0.000782289	0.839056	0.670906	FALSE	FALSE	FALSE	10	28728644	0.0348706	399474	0.982102	Other and unspecified psoriasis || id:finngen_R10_L12_PSORI_NAS	10	29017573	0.128047	5.62399e-06	233	Genus_Enhydrobacter_Volarforearm_Dry_PopGen || id:GCST90133231-2	2	TRUE	0.0848682	21.4227
rs1401283	G	A	G	A	-0.381361	0.0449906	0.630901	0.683996	FALSE	FALSE	FALSE	2	170278536	0.0358623	399474	0.209646	Other and unspecified psoriasis || id:finngen_R10_L12_PSORI_NAS	2	171135046	0.0829281	7.00509e-06	233	Genus_Enhydrobacter_Volarforearm_Dry_PopGen || id:GCST90133231-2	2	TRUE	0.0832114	20.9665
rs141500492	T	C	T	C	0.81967	-0.0556835	0.929185	0.933563	FALSE	FALSE	FALSE	2	38430056	0.0659506	399474	0.398491	Other and unspecified psoriasis || id:finngen_R10_L12_PSORI_NAS	2	38657198	0.178369	7.10865e-06	233	Genus_Enhydrobacter_Volarforearm_Dry_PopGen || id:GCST90133231-2	2	TRUE	0.0831007	20.9361
rs1425130	A	C	A	C	0.418714	-0.0150848	0.560086	0.628278	FALSE	FALSE	FALSE	7	37519127	0.0339129	399474	0.656457	Other and unspecified psoriasis || id:finngen_R10_L12_PSORI_NAS	7	37558730	0.0910778	7.04765e-06	233	Genus_Enhydrobacter_Volarforearm_Dry_PopGen || id:GCST90133231-2	2	TRUE	0.0831657	20.9539
rs1491121	T	A	T	A	-0.503535	-0.00927019	0.783262	0.762726	FALSE	TRUE	FALSE	9	106753141	0.038436	399474	0.809412	Other and unspecified psoriasis || id:finngen_R10_L12_PSORI_NAS	9	109515422	0.111068	9.3123e-06	233	Genus_Enhydrobacter_Volarforearm_Dry_PopGen || id:GCST90133231-2	2	TRUE	0.0810612	20.3769
rs6496260	A	C	A	C	-0.41171	-0.0223351	0.56867	0.540295	FALSE	FALSE	FALSE	15	97838255	0.0327262	399474	0.494934	Other and unspecified psoriasis || id:finngen_R10_L12_PSORI_NAS	15	98381485	0.0849929	2.33184e-06	233	Genus_Enhydrobacter_Volarforearm_Dry_PopGen || id:GCST90133231-2	2	TRUE	0.0914935	23.2635
rs9828670	G	A	G	A	-0.425327	0.0248859	0.579399	0.646802	FALSE	FALSE	FALSE	3	66666385	0.0342326	399474	0.467248	Other and unspecified psoriasis || id:finngen_R10_L12_PSORI_NAS	3	66716809	0.0856588	1.33254e-06	233	Genus_Enhydrobacter_Volarforearm_Dry_PopGen || id:GCST90133231-2	2	TRUE	0.0956896	24.4433
rs111743743	C	A	C	A	-0.855623	-0.0744655	0.929612	0.93689	FALSE	FALSE	FALSE	3	43818836	0.0667444	399474	0.264558	Other and unspecified psoriasis || id:finngen_R10_L12_PSORI_NAS	3	43860328	0.18766	8.83546e-06	206	Genus_Micrococcus_Dorsalforearm_Dry_PopGen || id:GCST90133232-1	2	TRUE	0.0916643	20.5866
rs11764256	A	G	A	G	-0.413861	0.00842378	0.558252	0.503366	FALSE	FALSE	FALSE	7	37701701	0.0325774	399474	0.795962	Other and unspecified psoriasis || id:finngen_R10_L12_PSORI_NAS	7	37741303	0.0904426	8.22596e-06	206	Genus_Micrococcus_Dorsalforearm_Dry_PopGen || id:GCST90133232-1	2	TRUE	0.0922685	20.7361
rs140949500	G	A	G	A	-0.882304	0.0411837	0.93932	0.943127	FALSE	FALSE	FALSE	3	101728461	0.0710914	399474	0.562381	Other and unspecified psoriasis || id:finngen_R10_L12_PSORI_NAS	3	101447305	0.191127	6.90255e-06	206	Genus_Micrococcus_Dorsalforearm_Dry_PopGen || id:GCST90133232-1	2	TRUE	0.0937503	21.1035
rs17084026	C	T	C	T	-0.647219	0.0665986	0.856796	0.896128	FALSE	FALSE	FALSE	13	64271111	0.0533023	399474	0.2115	Other and unspecified psoriasis || id:finngen_R10_L12_PSORI_NAS	13	64845243	0.123214	3.75534e-07	206	Genus_Micrococcus_Dorsalforearm_Dry_PopGen || id:GCST90133232-1	2	TRUE	0.11812	27.3241
rs2664121	T	G	T	G	-0.629771	-0.0111958	0.75	0.701633	FALSE	FALSE	FALSE	3	9122413	0.0357464	399474	0.754128	Other and unspecified psoriasis || id:finngen_R10_L12_PSORI_NAS	3	9164097	0.102627	4.31981e-09	206	Genus_Micrococcus_Dorsalforearm_Dry_PopGen || id:GCST90133232-1	2	TRUE	0.154549	37.2913
rs77505408	G	A	G	A	-0.982032	-0.00709342	0.949029	0.893398	FALSE	FALSE	FALSE	3	55564566	0.0537418	399474	0.894992	Other and unspecified psoriasis || id:finngen_R10_L12_PSORI_NAS	3	55598594	0.215739	9.12528e-06	206	Genus_Micrococcus_Dorsalforearm_Dry_PopGen || id:GCST90133232-1	2	TRUE	0.0913914	20.5191
rs10142830	G	A	G	A	0.525342	-0.0771443	0.704082	0.650789	FALSE	FALSE	FALSE	14	96251460	0.0343125	399474	0.0245578	Other and unspecified psoriasis || id:finngen_R10_L12_PSORI_NAS	14	96717797	0.108894	2.836e-06	196	Genus_Micrococcus_Volarforearm_Dry_PopGen || id:GCST90133232-2	2	TRUE	0.106141	23.0366
rs12477082	T	C	T	C	-0.616321	0.0145555	0.857143	0.83144	FALSE	FALSE	FALSE	2	55146800	0.0436183	399474	0.738605	Other and unspecified psoriasis || id:finngen_R10_L12_PSORI_NAS	2	55373936	0.129516	3.80045e-06	196	Genus_Micrococcus_Volarforearm_Dry_PopGen || id:GCST90133232-2	2	TRUE	0.103568	22.4135
rs142188220	C	T	C	T	-0.860869	0.0557506	0.936224	0.946572	FALSE	FALSE	FALSE	3	14915698	0.0726244	399474	0.442691	Other and unspecified psoriasis || id:finngen_R10_L12_PSORI_NAS	3	14957205	0.184171	5.51067e-06	196	Genus_Micrococcus_Volarforearm_Dry_PopGen || id:GCST90133232-2	2	TRUE	0.100294	21.6261
rs3782447	A	C	A	C	-0.480893	-0.000128574	0.632653	0.680142	FALSE	FALSE	FALSE	12	113875211	0.0349734	399474	0.997067	Other and unspecified psoriasis || id:finngen_R10_L12_PSORI_NAS	12	114313016	0.0980137	1.95953e-06	196	Genus_Micrococcus_Volarforearm_Dry_PopGen || id:GCST90133232-2	2	TRUE	0.109385	23.827
rs4768565	T	C	T	C	-1.07744	-0.029563	0.951531	0.873736	FALSE	FALSE	FALSE	12	39099256	0.0495008	399474	0.550359	Other and unspecified psoriasis || id:finngen_R10_L12_PSORI_NAS	12	39493058	0.225361	3.44189e-06	196	Genus_Micrococcus_Volarforearm_Dry_PopGen || id:GCST90133232-2	2	TRUE	0.10444	22.6242
rs6871719	A	G	A	G	-0.652051	0.0513949	0.854592	0.836584	FALSE	FALSE	FALSE	5	3872730	0.0447324	399474	0.250581	Other and unspecified psoriasis || id:finngen_R10_L12_PSORI_NAS	5	3872844	0.133882	2.30641e-06	196	Genus_Micrococcus_Volarforearm_Dry_PopGen || id:GCST90133232-2	2	TRUE	0.107956	23.478
rs7848343	C	T	C	T	-0.991752	-0.0825524	0.941327	0.905918	FALSE	FALSE	FALSE	9	16510626	0.0560101	399474	0.140513	Other and unspecified psoriasis || id:finngen_R10_L12_PSORI_NAS	9	16510624	0.207153	3.34242e-06	196	Genus_Micrococcus_Volarforearm_Dry_PopGen || id:GCST90133232-2	2	TRUE	0.104698	22.6866
rs8048962	T	C	T	C	0.433879	-0.0071056	0.487245	0.464489	FALSE	FALSE	FALSE	16	83052913	0.0328582	399474	0.828793	Other and unspecified psoriasis || id:finngen_R10_L12_PSORI_NAS	16	83086518	0.0932003	5.98664e-06	196	Genus_Micrococcus_Volarforearm_Dry_PopGen || id:GCST90133232-2	2	TRUE	0.0995634	21.451
rs944413	A	C	A	C	0.446211	0.0242416	0.548469	0.448975	FALSE	FALSE	FALSE	21	34022442	0.032791	399474	0.459739	Other and unspecified psoriasis || id:finngen_R10_L12_PSORI_NAS	21	35394743	0.0937939	3.822e-06	196	Genus_Micrococcus_Volarforearm_Dry_PopGen || id:GCST90133232-2	2	TRUE	0.103518	22.4015
rs10999373	G	A	G	A	-0.81079	0.0487916	0.916309	0.83885	FALSE	FALSE	FALSE	10	70525731	0.0444838	399474	0.272711	Other and unspecified psoriasis || id:finngen_R10_L12_PSORI_NAS	10	72285487	0.167429	2.34734e-06	233	Genus_Streptococcus_Dorsalforearm_Dry_PopGen || id:GCST90133234-1	2	TRUE	0.0914438	23.2495
rs11263700	G	A	G	A	-0.426762	0.0358475	0.633047	0.6286	FALSE	FALSE	FALSE	15	27044869	0.0337606	399474	0.28832	Other and unspecified psoriasis || id:finngen_R10_L12_PSORI_NAS	15	27290016	0.0933565	7.89898e-06	233	Genus_Streptococcus_Dorsalforearm_Dry_PopGen || id:GCST90133234-1	2	TRUE	0.0823047	20.7175
rs1468231	C	T	C	T	-0.424383	0.0141802	0.648069	0.73364	FALSE	FALSE	FALSE	4	104571665	0.0368886	399474	0.700679	Other and unspecified psoriasis || id:finngen_R10_L12_PSORI_NAS	4	105492822	0.0910433	5.3117e-06	233	Genus_Streptococcus_Dorsalforearm_Dry_PopGen || id:GCST90133234-1	2	TRUE	0.085299	21.5415
rs2183307	C	T	C	T	0.616703	-0.0719746	0.875536	0.909218	FALSE	FALSE	FALSE	20	857617	0.0568476	399474	0.205479	Other and unspecified psoriasis || id:finngen_R10_L12_PSORI_NAS	20	838260	0.136324	9.71646e-06	233	Genus_Streptococcus_Dorsalforearm_Dry_PopGen || id:GCST90133234-1	2	TRUE	0.08074	20.2891
rs2977806	T	C	T	C	-0.431465	-0.0174565	0.523605	0.490667	FALSE	FALSE	FALSE	8	6835446	0.0327044	399474	0.593502	Other and unspecified psoriasis || id:finngen_R10_L12_PSORI_NAS	8	6692968	0.0866973	1.26413e-06	233	Genus_Streptococcus_Dorsalforearm_Dry_PopGen || id:GCST90133234-1	2	TRUE	0.0960842	24.5548
rs55985964	A	G	A	G	-0.685423	-0.0497379	0.89485	0.913833	FALSE	FALSE	FALSE	8	32298837	0.0580759	399474	0.391761	Other and unspecified psoriasis || id:finngen_R10_L12_PSORI_NAS	8	32156353	0.150349	8.34046e-06	233	Genus_Streptococcus_Dorsalforearm_Dry_PopGen || id:GCST90133234-1	2	TRUE	0.0818939	20.6049
rs56865570	C	T	C	T	-0.682057	-0.0568851	0.888412	0.911013	FALSE	FALSE	FALSE	5	1654566	0.057099	399474	0.319127	Other and unspecified psoriasis || id:finngen_R10_L12_PSORI_NAS	5	1654681	0.143428	3.48711e-06	233	Genus_Streptococcus_Dorsalforearm_Dry_PopGen || id:GCST90133234-1	2	TRUE	0.0884686	22.4197
rs60368176	T	C	T	C	-0.419083	-0.0245169	0.665236	0.614993	FALSE	FALSE	FALSE	3	8206173	0.0334391	399474	0.463447	Other and unspecified psoriasis || id:finngen_R10_L12_PSORI_NAS	3	8247860	0.0898314	5.22091e-06	233	Genus_Streptococcus_Dorsalforearm_Dry_PopGen || id:GCST90133234-1	2	TRUE	0.0854289	21.5774
rs648161	A	G	A	G	-0.425907	0.0521613	0.624464	0.64855	FALSE	FALSE	FALSE	18	7042403	0.0344795	399474	0.130326	Other and unspecified psoriasis || id:finngen_R10_L12_PSORI_NAS	18	7042402	0.091468	5.4305e-06	233	Genus_Streptococcus_Dorsalforearm_Dry_PopGen || id:GCST90133234-1	2	TRUE	0.0851322	21.4955
rs7215354	G	A	G	A	-0.47275	-0.0449314	0.746781	0.720218	FALSE	FALSE	FALSE	17	50644879	0.0364732	399474	0.217986	Other and unspecified psoriasis || id:finngen_R10_L12_PSORI_NAS	17	48722240	0.103243	7.6369e-06	233	Genus_Streptococcus_Dorsalforearm_Dry_PopGen || id:GCST90133234-1	2	TRUE	0.0825595	20.7874
rs72808194	G	C	G	C	-0.7456	0.062157	0.916309	0.908652	FALSE	TRUE	FALSE	5	159918615	0.0563882	399474	0.270329	Other and unspecified psoriasis || id:finngen_R10_L12_PSORI_NAS	5	159345622	0.16334	8.1307e-06	233	Genus_Streptococcus_Dorsalforearm_Dry_PopGen || id:GCST90133234-1	2	TRUE	0.0820863	20.6576
rs957231	G	A	G	A	-0.638355	-0.0697464	0.845494	0.860654	FALSE	FALSE	FALSE	3	150999132	0.0472751	399474	0.140124	Other and unspecified psoriasis || id:finngen_R10_L12_PSORI_NAS	3	150716919	0.120305	2.62171e-07	233	Genus_Streptococcus_Dorsalforearm_Dry_PopGen || id:GCST90133234-1	2	TRUE	0.107809	27.9133
rs12460776	G	A	G	A	-0.876079	0.108	0.944444	0.930818	FALSE	FALSE	FALSE	19	54687475	0.0641967	399474	0.0925039	Other and unspecified psoriasis || id:finngen_R10_L12_PSORI_NAS	19	55198771	0.191748	7.9666e-06	234	Genus_Streptococcus_Volarforearm_Dry_PopGen || id:GCST90133234-2	2	TRUE	0.0819027	20.6965
rs16905575	T	G	T	G	-0.684837	0.0937083	0.90812	0.896782	FALSE	FALSE	FALSE	9	117384493	0.0538985	399474	0.0821032	Other and unspecified psoriasis || id:finngen_R10_L12_PSORI_NAS	9	120146772	0.142453	2.74843e-06	234	Genus_Streptococcus_Volarforearm_Dry_PopGen || id:GCST90133234-2	2	TRUE	0.0898898	22.9142
rs17384121	C	T	C	T	-0.810447	0.0717748	0.938034	0.900976	FALSE	FALSE	FALSE	9	118941150	0.0546965	399474	0.189439	Other and unspecified psoriasis || id:finngen_R10_L12_PSORI_NAS	9	121703428	0.177176	7.78234e-06	234	Genus_Streptococcus_Volarforearm_Dry_PopGen || id:GCST90133234-2	2	TRUE	0.0820787	20.745
rs28661929	G	T	G	T	-0.7494	-0.0132609	0.901709	0.927737	FALSE	FALSE	FALSE	15	35726433	0.0630913	399474	0.833522	Other and unspecified psoriasis || id:finngen_R10_L12_PSORI_NAS	15	36018634	0.157509	3.44137e-06	234	Genus_Streptococcus_Volarforearm_Dry_PopGen || id:GCST90133234-2	2	TRUE	0.0882056	22.4433
rs61942139	G	A	G	A	0.553676	0.0243547	0.83547	0.870287	FALSE	FALSE	FALSE	12	106269985	0.048799	399474	0.617722	Other and unspecified psoriasis || id:finngen_R10_L12_PSORI_NAS	12	106663763	0.12247	9.81956e-06	234	Genus_Streptococcus_Volarforearm_Dry_PopGen || id:GCST90133234-2	2	TRUE	0.0803289	20.2641
rs7222487	T	G	T	G	0.68131	0.020076	0.867521	0.873622	FALSE	FALSE	FALSE	17	879659	0.0489196	399474	0.681522	Other and unspecified psoriasis || id:finngen_R10_L12_PSORI_NAS	17	782899	0.135276	9.5279e-07	234	Genus_Streptococcus_Volarforearm_Dry_PopGen || id:GCST90133234-2	2	TRUE	0.0977995	25.1491
rs12893622	C	T	C	T	-1.10345	0.0269874	0.936364	0.921362	FALSE	FALSE	FALSE	14	52208926	0.0604585	399474	0.655324	Other and unspecified psoriasis || id:finngen_R10_L12_PSORI_NAS	14	52675644	0.215461	8.47476e-07	165	Genus_Chryseobacterium_Dorsalforearm_Dry_PopGen || id:GCST90133236-1	2	TRUE	0.137158	25.9105
rs13211056	A	G	A	G	-0.488296	-0.0655476	0.587879	0.605003	FALSE	FALSE	FALSE	6	20961640	0.0333177	399474	0.0491428	Other and unspecified psoriasis || id:finngen_R10_L12_PSORI_NAS	6	20961871	0.100176	2.57137e-06	165	Genus_Chryseobacterium_Dorsalforearm_Dry_PopGen || id:GCST90133236-1	2	TRUE	0.125872	23.4715
rs2012235	T	C	T	C	-0.524204	0.0217112	0.681818	0.655798	FALSE	FALSE	FALSE	1	68447072	0.0343455	399474	0.527294	Other and unspecified psoriasis || id:finngen_R10_L12_PSORI_NAS	1	68912755	0.11314	7.33033e-06	165	Genus_Chryseobacterium_Dorsalforearm_Dry_PopGen || id:GCST90133236-1	2	TRUE	0.115124	21.2065
rs3807302	T	C	T	C	0.489323	0.0235984	0.642424	0.722453	FALSE	FALSE	FALSE	7	129004803	0.0364114	399474	0.516917	Other and unspecified psoriasis || id:finngen_R10_L12_PSORI_NAS	7	128644857	0.104583	6.0309e-06	165	Genus_Chryseobacterium_Dorsalforearm_Dry_PopGen || id:GCST90133236-1	2	TRUE	0.117132	21.6256
rs665207	G	T	G	T	-0.744956	0.0871094	0.845455	0.83717	FALSE	FALSE	FALSE	18	22514315	0.0440748	399474	0.0481094	Other and unspecified psoriasis || id:finngen_R10_L12_PSORI_NAS	18	20094278	0.143346	5.99167e-07	165	Genus_Chryseobacterium_Dorsalforearm_Dry_PopGen || id:GCST90133236-1	2	TRUE	0.140661	26.6806
rs9381217	A	G	A	G	-0.904829	0.117478	0.927273	0.957041	FALSE	FALSE	FALSE	6	42761634	0.0804984	399474	0.144461	Other and unspecified psoriasis || id:finngen_R10_L12_PSORI_NAS	6	42729372	0.197125	8.80493e-06	165	Genus_Chryseobacterium_Dorsalforearm_Dry_PopGen || id:GCST90133236-1	2	TRUE	0.113234	20.814
rs2400118	A	G	A	G	0.51419	-0.00330065	0.722222	0.743149	FALSE	FALSE	FALSE	10	15106149	0.0371278	399474	0.929161	Other and unspecified psoriasis || id:finngen_R10_L12_PSORI_NAS	10	15148148	0.111925	8.76407e-06	162	Genus_Chryseobacterium_Volarforearm_Dry_PopGen || id:GCST90133236-2	2	TRUE	0.115263	20.8447
rs6555076	C	T	C	T	0.545129	-0.0580735	0.450617	0.547259	FALSE	FALSE	FALSE	5	2272499	0.032829	399474	0.0768989	Other and unspecified psoriasis || id:finngen_R10_L12_PSORI_NAS	5	2272613	0.110625	2.06075e-06	162	Genus_Chryseobacterium_Volarforearm_Dry_PopGen || id:GCST90133236-2	2	TRUE	0.130353	23.9826
rs6594434	G	A	G	A	-0.680321	-0.0815785	0.824074	0.868219	FALSE	FALSE	FALSE	5	110160435	0.0486177	399474	0.0933555	Other and unspecified psoriasis || id:finngen_R10_L12_PSORI_NAS	5	109496136	0.138535	2.22102e-06	162	Genus_Chryseobacterium_Volarforearm_Dry_PopGen || id:GCST90133236-2	2	TRUE	0.129576	23.8185
rs7302235	T	C	T	C	-0.547382	0.0633986	0.753086	0.787468	FALSE	FALSE	FALSE	12	47899055	0.0398284	399474	0.111431	Other and unspecified psoriasis || id:finngen_R10_L12_PSORI_NAS	12	48292838	0.116265	5.38648e-06	162	Genus_Chryseobacterium_Volarforearm_Dry_PopGen || id:GCST90133236-2	2	TRUE	0.120357	21.8919
rs7339361	C	T	C	T	-0.969383	0.0118603	0.938272	0.930476	FALSE	FALSE	FALSE	13	108851784	0.0646829	399474	0.854515	Other and unspecified psoriasis || id:finngen_R10_L12_PSORI_NAS	13	109504132	0.212009	9.6055e-06	162	Genus_Chryseobacterium_Volarforearm_Dry_PopGen || id:GCST90133236-2	2	TRUE	0.114301	20.6483
rs12540948	A	T	A	T	-0.893188	-0.103413	0.933921	0.96912	FALSE	TRUE	FALSE	7	12664197	0.0959941	399474	0.281353	Other and unspecified psoriasis || id:finngen_R10_L12_PSORI_NAS	7	12703822	0.186236	2.94483e-06	227	Genus_Acinetobacter_Dorsalforearm_Dry_PopGen || id:GCST90133237-1	2	TRUE	0.0920061	22.799
rs1959553	C	T	C	T	-0.414792	-0.0233284	0.601322	0.550588	FALSE	FALSE	FALSE	14	48724098	0.0327167	399474	0.475819	Other and unspecified psoriasis || id:finngen_R10_L12_PSORI_NAS	14	49193301	0.0898252	6.52354e-06	227	Genus_Acinetobacter_Dorsalforearm_Dry_PopGen || id:GCST90133237-1	2	TRUE	0.085871	21.1359
rs2031063	T	C	T	C	-0.45696	-0.00568225	0.689427	0.718899	FALSE	FALSE	FALSE	14	21534209	0.0374532	399474	0.879411	Other and unspecified psoriasis || id:finngen_R10_L12_PSORI_NAS	14	22002343	0.10101	9.82639e-06	227	Genus_Acinetobacter_Dorsalforearm_Dry_PopGen || id:GCST90133237-1	2	TRUE	0.0827022	20.2857
rs304020	T	C	T	C	-0.597734	-0.0414154	0.803965	0.798866	FALSE	FALSE	FALSE	3	4523544	0.0409175	399474	0.311458	Other and unspecified psoriasis || id:finngen_R10_L12_PSORI_NAS	3	4565228	0.114133	3.74036e-07	227	Genus_Acinetobacter_Dorsalforearm_Dry_PopGen || id:GCST90133237-1	2	TRUE	0.107803	27.1863
rs36125261	T	G	T	G	0.574782	0.01866	0.834802	0.855064	FALSE	FALSE	FALSE	4	136431847	0.0464409	399474	0.68783	Other and unspecified psoriasis || id:finngen_R10_L12_PSORI_NAS	4	137353002	0.120533	3.33204e-06	227	Genus_Acinetobacter_Dorsalforearm_Dry_PopGen || id:GCST90133237-1	2	TRUE	0.0910548	22.5397
rs3827962	T	C	T	C	-0.558491	-0.0458751	0.823789	0.812107	FALSE	FALSE	FALSE	20	20535376	0.0418146	399474	0.272595	Other and unspecified psoriasis || id:finngen_R10_L12_PSORI_NAS	20	20516020	0.117212	3.3905e-06	227	Genus_Acinetobacter_Dorsalforearm_Dry_PopGen || id:GCST90133237-1	2	TRUE	0.0909208	22.5032
rs62068856	G	A	G	A	0.519019	-0.0327016	0.801762	0.675668	FALSE	FALSE	FALSE	17	70900034	0.0348491	399474	0.34805	Other and unspecified psoriasis || id:finngen_R10_L12_PSORI_NAS	17	68896175	0.112098	6.18025e-06	227	Genus_Acinetobacter_Dorsalforearm_Dry_PopGen || id:GCST90133237-1	2	TRUE	0.0862887	21.2485
rs7259156	G	A	G	A	-0.86694	0.0141236	0.927313	0.861625	FALSE	FALSE	FALSE	19	10387790	0.0473063	399474	0.765278	Other and unspecified psoriasis || id:finngen_R10_L12_PSORI_NAS	19	10498466	0.178749	2.30361e-06	227	Genus_Acinetobacter_Dorsalforearm_Dry_PopGen || id:GCST90133237-1	2	TRUE	0.0938954	23.3157
rs75113394	G	T	G	T	-0.933056	0.0720602	0.947137	0.945324	FALSE	FALSE	FALSE	17	74117633	0.0720877	399474	0.317495	Other and unspecified psoriasis || id:finngen_R10_L12_PSORI_NAS	17	72113772	0.206168	9.751e-06	227	Genus_Acinetobacter_Dorsalforearm_Dry_PopGen || id:GCST90133237-1	2	TRUE	0.0827618	20.3016
rs76950018	C	T	C	T	-0.623869	0.102544	0.865639	0.886906	FALSE	FALSE	FALSE	3	82360196	0.0518907	399474	0.0481371	Other and unspecified psoriasis || id:finngen_R10_L12_PSORI_NAS	3	82409347	0.136918	8.52978e-06	227	Genus_Acinetobacter_Dorsalforearm_Dry_PopGen || id:GCST90133237-1	2	TRUE	0.0837975	20.5789
rs111677838	A	G	A	G	-0.892773	0.143977	0.933628	0.970524	FALSE	FALSE	FALSE	7	114995057	0.0966411	399474	0.136274	Other and unspecified psoriasis || id:finngen_R10_L12_PSORI_NAS	7	114635111	0.185779	2.82706e-06	226	Genus_Acinetobacter_Volarforearm_Dry_PopGen || id:GCST90133237-2	2	TRUE	0.0927103	22.8892
rs13404351	A	G	A	G	-0.639639	-0.0607507	0.873894	0.888671	FALSE	FALSE	FALSE	2	38231593	0.0521384	399474	0.243946	Other and unspecified psoriasis || id:finngen_R10_L12_PSORI_NAS	2	38458735	0.139352	7.38182e-06	226	Genus_Acinetobacter_Volarforearm_Dry_PopGen || id:GCST90133237-2	2	TRUE	0.0852758	20.8826
rs149780745	C	T	C	T	-0.71511	-0.0089671	0.915929	0.92614	FALSE	FALSE	FALSE	5	75097923	0.0621329	399474	0.885247	Other and unspecified psoriasis || id:finngen_R10_L12_PSORI_NAS	5	74393748	0.155093	6.73998e-06	226	Genus_Acinetobacter_Volarforearm_Dry_PopGen || id:GCST90133237-2	2	TRUE	0.0859819	21.0717
rs2405112	G	A	G	A	-0.517864	0.0631956	0.800885	0.702318	FALSE	FALSE	FALSE	4	135481558	0.0354985	399474	0.0750378	Other and unspecified psoriasis || id:finngen_R10_L12_PSORI_NAS	4	136402713	0.113672	8.57464e-06	226	Genus_Acinetobacter_Volarforearm_Dry_PopGen || id:GCST90133237-2	2	TRUE	0.0841125	20.5715
rs2780993	C	A	C	A	0.466854	0.00166665	0.75885	0.749938	FALSE	FALSE	FALSE	9	83573298	0.0377326	399474	0.964769	Other and unspecified psoriasis || id:finngen_R10_L12_PSORI_NAS	9	86188213	0.101136	6.58649e-06	226	Genus_Acinetobacter_Volarforearm_Dry_PopGen || id:GCST90133237-2	2	TRUE	0.0861607	21.1197
rs62109119	A	C	A	C	0.716067	-0.0492368	0.900442	0.880691	FALSE	FALSE	FALSE	19	13339561	0.0502154	399474	0.326833	Other and unspecified psoriasis || id:finngen_R10_L12_PSORI_NAS	19	13450375	0.154112	5.76291e-06	226	Genus_Acinetobacter_Volarforearm_Dry_PopGen || id:GCST90133237-2	2	TRUE	0.0871969	21.3979
rs73162649	T	G	T	G	0.690314	-0.0297902	0.896018	0.908428	FALSE	FALSE	FALSE	12	129981163	0.0565465	399474	0.598314	Other and unspecified psoriasis || id:finngen_R10_L12_PSORI_NAS	12	130465708	0.147986	5.31442e-06	226	Genus_Acinetobacter_Volarforearm_Dry_PopGen || id:GCST90133237-2	2	TRUE	0.087825	21.5669
rs76548567	A	G	A	G	-0.742535	0.0290673	0.90708	0.906669	FALSE	FALSE	FALSE	11	21465183	0.0559581	399474	0.603448	Other and unspecified psoriasis || id:finngen_R10_L12_PSORI_NAS	11	21486729	0.153208	2.34642e-06	226	Genus_Acinetobacter_Volarforearm_Dry_PopGen || id:GCST90133237-2	2	TRUE	0.0941497	23.2815
rs11569020	A	G	A	G	-0.928615	0.0837238	0.930108	0.936081	FALSE	FALSE	FALSE	4	109981913	0.0660812	399474	0.205161	Other and unspecified psoriasis || id:finngen_R10_L12_PSORI_NAS	4	110903069	0.197451	5.01765e-06	186	Genus_Paracoccus_Dorsalforearm_Dry_PopGen || id:GCST90133238-1	2	TRUE	0.106278	21.8805
rs12583353	A	G	A	G	-0.720948	0.0628206	0.889785	0.851384	FALSE	FALSE	FALSE	13	37493438	0.0463363	399474	0.175178	Other and unspecified psoriasis || id:finngen_R10_L12_PSORI_NAS	13	38067575	0.156002	7.15289e-06	186	Genus_Paracoccus_Dorsalforearm_Dry_PopGen || id:GCST90133238-1	2	TRUE	0.102998	21.1278
rs17241022	G	A	G	A	-0.811424	0.0219025	0.895161	0.875031	FALSE	FALSE	FALSE	16	57920621	0.0494426	399474	0.657774	Other and unspecified psoriasis || id:finngen_R10_L12_PSORI_NAS	16	57954525	0.161806	1.24368e-06	186	Genus_Paracoccus_Dorsalforearm_Dry_PopGen || id:GCST90133238-1	2	TRUE	0.119102	24.8777
rs640184	G	A	G	A	-0.639823	0.0124009	0.857527	0.855371	FALSE	FALSE	FALSE	9	98354047	0.0462842	399474	0.788755	Other and unspecified psoriasis || id:finngen_R10_L12_PSORI_NAS	9	101116329	0.131723	2.53531e-06	186	Genus_Paracoccus_Dorsalforearm_Dry_PopGen || id:GCST90133238-1	2	TRUE	0.112569	23.3402
rs643106	T	A	T	A	-0.93612	0.0441518	0.932796	0.925333	FALSE	TRUE	FALSE	7	125148521	0.0617835	399474	0.474843	Other and unspecified psoriasis || id:finngen_R10_L12_PSORI_NAS	7	124788575	0.200937	6.08459e-06	186	Genus_Paracoccus_Dorsalforearm_Dry_PopGen || id:GCST90133238-1	2	TRUE	0.104495	21.4707
rs6996139	C	T	C	T	-0.483451	-0.0168218	0.629032	0.662857	FALSE	FALSE	FALSE	8	129543825	0.0345641	399474	0.626481	Other and unspecified psoriasis || id:finngen_R10_L12_PSORI_NAS	8	130556071	0.102039	4.30599e-06	186	Genus_Paracoccus_Dorsalforearm_Dry_PopGen || id:GCST90133238-1	2	TRUE	0.10769	22.2063
rs7117184	G	A	G	A	-0.767815	0.0614837	0.903226	0.930465	FALSE	FALSE	FALSE	11	88341550	0.0641763	399474	0.338041	Other and unspecified psoriasis || id:finngen_R10_L12_PSORI_NAS	11	88074718	0.162378	4.48627e-06	186	Genus_Paracoccus_Dorsalforearm_Dry_PopGen || id:GCST90133238-1	2	TRUE	0.107311	22.1189
rs73136542	G	A	G	A	-0.941252	-0.0726976	0.932796	0.960871	FALSE	FALSE	FALSE	2	8650680	0.0846897	399474	0.390672	Other and unspecified psoriasis || id:finngen_R10_L12_PSORI_NAS	2	8790810	0.200807	5.3729e-06	186	Genus_Paracoccus_Dorsalforearm_Dry_PopGen || id:GCST90133238-1	2	TRUE	0.105645	21.735
rs76013506	A	G	A	G	-0.686727	-0.0664151	0.841398	0.907404	FALSE	FALSE	FALSE	11	63691726	0.0563345	399474	0.238422	Other and unspecified psoriasis || id:finngen_R10_L12_PSORI_NAS	11	63459198	0.132916	6.16525e-07	186	Genus_Paracoccus_Dorsalforearm_Dry_PopGen || id:GCST90133238-1	2	TRUE	0.125505	26.407
rs10801363	T	A	T	A	0.504419	-0.0222793	0.610215	0.667373	FALSE	TRUE	FALSE	1	194953077	0.0346183	399474	0.519854	Other and unspecified psoriasis || id:finngen_R10_L12_PSORI_NAS	1	194922207	0.107522	5.28038e-06	186	Genus_Paracoccus_Volarforearm_Dry_PopGen || id:GCST90133238-2	2	TRUE	0.105806	21.7719
rs10986020	A	G	A	G	-0.931344	-0.00880405	0.922043	0.920209	FALSE	FALSE	FALSE	9	123449487	0.060516	399474	0.884329	Other and unspecified psoriasis || id:finngen_R10_L12_PSORI_NAS	9	126211766	0.18546	1.20445e-06	186	Genus_Paracoccus_Volarforearm_Dry_PopGen || id:GCST90133238-2	2	TRUE	0.119395	24.9473
rs12456652	A	C	A	C	-0.598046	0.0256674	0.846774	0.845848	FALSE	FALSE	FALSE	18	55582819	0.0451181	399474	0.56943	Other and unspecified psoriasis || id:finngen_R10_L12_PSORI_NAS	18	53250050	0.128972	6.68635e-06	186	Genus_Paracoccus_Volarforearm_Dry_PopGen || id:GCST90133238-2	2	TRUE	0.103623	21.2707
rs12583353	A	G	A	G	-0.941265	0.0628206	0.88172	0.851384	FALSE	FALSE	FALSE	13	37493438	0.0463363	399474	0.175178	Other and unspecified psoriasis || id:finngen_R10_L12_PSORI_NAS	13	38067575	0.143708	5.59157e-10	186	Genus_Paracoccus_Volarforearm_Dry_PopGen || id:GCST90133238-2	2	TRUE	0.187419	42.4391
rs12781740	C	T	C	T	-0.633722	-0.0909652	0.86828	0.808471	FALSE	FALSE	FALSE	10	62618207	0.041464	399474	0.0282475	Other and unspecified psoriasis || id:finngen_R10_L12_PSORI_NAS	10	64377967	0.136338	6.37069e-06	186	Genus_Paracoccus_Volarforearm_Dry_PopGen || id:GCST90133238-2	2	TRUE	0.10407	21.3733
rs45546031	C	T	C	T	-0.591108	0.00739763	0.827957	0.851372	FALSE	FALSE	FALSE	10	95290798	0.0456848	399474	0.871363	Other and unspecified psoriasis || id:finngen_R10_L12_PSORI_NAS	10	97050555	0.120885	2.19153e-06	186	Genus_Paracoccus_Volarforearm_Dry_PopGen || id:GCST90133238-2	2	TRUE	0.113909	23.6535
rs72752881	G	A	G	A	-0.736345	-0.0605769	0.876344	0.853374	FALSE	FALSE	FALSE	1	240602074	0.0461853	399474	0.189653	Other and unspecified psoriasis || id:finngen_R10_L12_PSORI_NAS	1	240765374	0.147783	1.44042e-06	186	Genus_Paracoccus_Volarforearm_Dry_PopGen || id:GCST90133238-2	2	TRUE	0.117758	24.5595
rs7512985	G	A	G	A	0.487232	-0.0156739	0.577957	0.614347	FALSE	FALSE	FALSE	1	181711957	0.0335027	399474	0.6399	Other and unspecified psoriasis || id:finngen_R10_L12_PSORI_NAS	1	181681093	0.100211	2.48242e-06	186	Genus_Paracoccus_Volarforearm_Dry_PopGen || id:GCST90133238-2	2	TRUE	0.112763	23.3855
rs7611260	C	T	C	T	-0.43698	0.0168589	0.620968	0.633907	FALSE	FALSE	FALSE	3	32983618	0.0340211	399474	0.620217	Other and unspecified psoriasis || id:finngen_R10_L12_PSORI_NAS	3	33025110	0.0955748	8.8422e-06	186	Genus_Paracoccus_Volarforearm_Dry_PopGen || id:GCST90133238-2	2	TRUE	0.101034	20.6796
rs77095324	G	A	G	A	-0.571266	0.0402135	0.795699	0.76098	FALSE	FALSE	FALSE	5	35446361	0.0383222	399474	0.294016	Other and unspecified psoriasis || id:finngen_R10_L12_PSORI_NAS	5	35446463	0.125099	9.05725e-06	186	Genus_Paracoccus_Volarforearm_Dry_PopGen || id:GCST90133238-2	2	TRUE	0.100811	20.6288
rs78808473	G	C	G	C	-0.764027	-0.0481196	0.895161	0.927429	FALSE	TRUE	FALSE	8	100618774	0.0630437	399474	0.4453	Other and unspecified psoriasis || id:finngen_R10_L12_PSORI_NAS	8	101631002	0.166995	8.72852e-06	186	Genus_Paracoccus_Volarforearm_Dry_PopGen || id:GCST90133238-2	2	TRUE	0.101154	20.7069
rs7976781	C	T	C	T	-0.589291	0.0230336	0.830645	0.779584	FALSE	FALSE	FALSE	12	104461852	0.0397277	399474	0.562058	Other and unspecified psoriasis || id:finngen_R10_L12_PSORI_NAS	12	104855630	0.126306	5.90718e-06	186	Genus_Paracoccus_Volarforearm_Dry_PopGen || id:GCST90133238-2	2	TRUE	0.104769	21.5336
rs10118880	A	G	A	G	-0.436452	0.0469465	0.667442	0.724203	FALSE	FALSE	FALSE	9	21559962	0.0365694	399474	0.199225	Other and unspecified psoriasis || id:finngen_R10_L12_PSORI_NAS	9	21559961	0.0947295	7.01819e-06	215	Genus_Finegoldia_Dorsalforearm_Dry_PopGen || id:GCST90133239-1	2	TRUE	0.0898612	21.0302
rs10226357	G	A	G	A	0.497015	0.125726	0.590698	0.684568	FALSE	FALSE	FALSE	7	886312	0.0354095	399474	0.000384326	Other and unspecified psoriasis || id:finngen_R10_L12_PSORI_NAS	7	925949	0.102672	2.48231e-06	215	Genus_Finegoldia_Dorsalforearm_Dry_PopGen || id:GCST90133239-1	2	TRUE	0.0982809	23.2155
rs11940551	T	G	T	G	0.724761	0.0265627	0.911628	0.883895	FALSE	FALSE	FALSE	4	27160856	0.050709	399474	0.6004	Other and unspecified psoriasis || id:finngen_R10_L12_PSORI_NAS	4	27162478	0.152079	3.48262e-06	215	Genus_Finegoldia_Dorsalforearm_Dry_PopGen || id:GCST90133239-1	2	TRUE	0.0955431	22.5004
rs1320110	G	C	G	C	-0.482034	-0.0110299	0.7	0.621638	FALSE	TRUE	FALSE	2	102935850	0.0337131	399474	0.743539	Other and unspecified psoriasis || id:finngen_R10_L12_PSORI_NAS	2	103552308	0.0970888	1.40724e-06	215	Genus_Finegoldia_Dorsalforearm_Dry_PopGen || id:GCST90133239-1	2	TRUE	0.102858	24.4207
rs4813706	A	G	A	G	-0.961994	-0.0071834	0.94186	0.883396	FALSE	FALSE	FALSE	20	4628351	0.0510007	399474	0.887989	Other and unspecified psoriasis || id:finngen_R10_L12_PSORI_NAS	20	4608997	0.20289	3.88118e-06	215	Genus_Finegoldia_Dorsalforearm_Dry_PopGen || id:GCST90133239-1	2	TRUE	0.0946658	22.2722
rs9355457	A	G	A	G	-0.610404	0.0167292	0.774419	0.776255	FALSE	FALSE	FALSE	6	164036224	0.0390121	399474	0.668055	Other and unspecified psoriasis || id:finngen_R10_L12_PSORI_NAS	6	164457256	0.111196	1.14098e-07	215	Genus_Finegoldia_Dorsalforearm_Dry_PopGen || id:GCST90133239-1	2	TRUE	0.122928	29.8534
rs10248630	G	T	G	T	0.453572	-0.0428038	0.567757	0.576977	FALSE	FALSE	FALSE	7	67650451	0.0329829	399474	0.194371	Other and unspecified psoriasis || id:finngen_R10_L12_PSORI_NAS	7	67115438	0.0945887	3.05863e-06	214	Genus_Finegoldia_Volarforearm_Dry_PopGen || id:GCST90133239-2	2	TRUE	0.0970235	22.7791
rs12132293	T	C	T	C	-0.763481	-0.0535338	0.913551	0.905891	FALSE	FALSE	FALSE	1	92417920	0.0559007	399474	0.338235	Other and unspecified psoriasis || id:finngen_R10_L12_PSORI_NAS	1	92883477	0.167317	8.53023e-06	214	Genus_Finegoldia_Volarforearm_Dry_PopGen || id:GCST90133239-2	2	TRUE	0.0886704	20.6271
rs12215511	C	A	C	A	-0.558268	0.0523223	0.808411	0.785557	FALSE	FALSE	FALSE	6	4878338	0.0397242	399474	0.187792	Other and unspecified psoriasis || id:finngen_R10_L12_PSORI_NAS	6	4878572	0.120612	6.40967e-06	214	Genus_Finegoldia_Volarforearm_Dry_PopGen || id:GCST90133239-2	2	TRUE	0.0910026	21.224
rs1223678	C	T	C	T	0.576003	0.0216713	0.827103	0.766133	FALSE	FALSE	FALSE	1	214220281	0.0384893	399474	0.573403	Other and unspecified psoriasis || id:finngen_R10_L12_PSORI_NAS	1	214393624	0.120397	3.21393e-06	214	Genus_Finegoldia_Volarforearm_Dry_PopGen || id:GCST90133239-2	2	TRUE	0.0966212	22.6745
rs16890598	C	T	C	T	-0.609106	-0.0200592	0.813084	0.833298	FALSE	FALSE	FALSE	4	14510088	0.0438891	399474	0.647641	Other and unspecified psoriasis || id:finngen_R10_L12_PSORI_NAS	4	14511712	0.124516	1.97416e-06	214	Genus_Finegoldia_Volarforearm_Dry_PopGen || id:GCST90133239-2	2	TRUE	0.100575	23.7061
rs413840	G	T	G	T	-0.760262	-0.0455699	0.906542	0.91981	FALSE	FALSE	FALSE	7	108143167	0.0600335	399474	0.447807	Other and unspecified psoriasis || id:finngen_R10_L12_PSORI_NAS	7	107783612	0.162197	4.95044e-06	214	Genus_Finegoldia_Volarforearm_Dry_PopGen || id:GCST90133239-2	2	TRUE	0.0931076	21.7653
rs58997504	G	T	G	T	-0.914028	-0.00273692	0.936916	0.911688	FALSE	FALSE	FALSE	2	212667523	0.0574493	399474	0.962003	Other and unspecified psoriasis || id:finngen_R10_L12_PSORI_NAS	2	213532247	0.196325	5.69154e-06	214	Genus_Finegoldia_Volarforearm_Dry_PopGen || id:GCST90133239-2	2	TRUE	0.0919712	21.4728
rs6020156	C	G	C	G	-0.754534	-0.0959256	0.89486	0.900324	FALSE	TRUE	FALSE	20	49971096	0.054529	399474	0.0785489	Other and unspecified psoriasis || id:finngen_R10_L12_PSORI_NAS	20	48587633	0.142609	3.02699e-07	214	Genus_Finegoldia_Volarforearm_Dry_PopGen || id:GCST90133239-2	2	TRUE	0.11568	27.7322
rs932047	G	T	G	T	-0.606661	0.0462061	0.864486	0.806388	FALSE	FALSE	FALSE	15	76957675	0.0413099	399474	0.263343	Other and unspecified psoriasis || id:finngen_R10_L12_PSORI_NAS	15	77250016	0.129345	4.8861e-06	214	Genus_Finegoldia_Volarforearm_Dry_PopGen || id:GCST90133239-2	2	TRUE	0.0932141	21.7928
rs112247259	C	T	C	T	0.510929	-0.0983611	0.76	0.871173	FALSE	FALSE	FALSE	6	146781301	0.0487304	399474	0.0435412	Other and unspecified psoriasis || id:finngen_R10_L12_PSORI_NAS	6	147102437	0.111899	8.72325e-06	200	Genus_Rothia_Dorsalforearm_Dry_PopGen || id:GCST90133240-1	2	TRUE	0.0944004	20.6397
rs2386584	T	G	T	G	0.462372	-0.0141973	0.5725	0.585542	FALSE	FALSE	FALSE	15	90996342	0.0330169	399474	0.667194	Other and unspecified psoriasis || id:finngen_R10_L12_PSORI_NAS	15	91539572	0.100648	7.72922e-06	200	Genus_Rothia_Dorsalforearm_Dry_PopGen || id:GCST90133240-1	2	TRUE	0.0954506	20.8935
rs2722313	G	A	G	A	-0.861561	0.0582279	0.9275	0.843759	FALSE	FALSE	FALSE	7	37862887	0.0450152	399474	0.195833	Other and unspecified psoriasis || id:finngen_R10_L12_PSORI_NAS	7	37902489	0.175551	1.92035e-06	200	Genus_Rothia_Dorsalforearm_Dry_PopGen || id:GCST90133240-1	2	TRUE	0.107485	23.8451
rs4000736	G	A	G	A	-0.46031	0.0305307	0.7	0.638559	FALSE	FALSE	FALSE	1	92501859	0.0338595	399474	0.367224	Other and unspecified psoriasis || id:finngen_R10_L12_PSORI_NAS	1	92967416	0.101197	9.39857e-06	200	Genus_Rothia_Dorsalforearm_Dry_PopGen || id:GCST90133240-1	2	TRUE	0.0937527	20.4834
rs4654254	A	G	A	G	-0.508742	0.107277	0.7475	0.785756	FALSE	FALSE	FALSE	1	246446974	0.0402996	399474	0.00776784	Other and unspecified psoriasis || id:finngen_R10_L12_PSORI_NAS	1	246610276	0.111885	9.46593e-06	200	Genus_Rothia_Dorsalforearm_Dry_PopGen || id:GCST90133240-1	2	TRUE	0.0936907	20.4685
rs56839549	A	G	A	G	-0.658742	-0.0437655	0.905	0.879006	FALSE	FALSE	FALSE	14	50812717	0.0499444	399474	0.380875	Other and unspecified psoriasis || id:finngen_R10_L12_PSORI_NAS	14	51279435	0.145174	9.85538e-06	200	Genus_Rothia_Dorsalforearm_Dry_PopGen || id:GCST90133240-1	2	TRUE	0.0933403	20.384
rs6027553	T	C	T	C	-0.465516	-0.00633456	0.6725	0.64525	FALSE	FALSE	FALSE	20	60368123	0.0340493	399474	0.852413	Other and unspecified psoriasis || id:finngen_R10_L12_PSORI_NAS	20	58943181	0.0967552	2.96738e-06	200	Genus_Rothia_Dorsalforearm_Dry_PopGen || id:GCST90133240-1	2	TRUE	0.103735	22.9169
rs9514997	A	G	A	G	0.583054	0.0263063	0.835	0.82261	FALSE	FALSE	FALSE	13	109159163	0.0427302	399474	0.538135	Other and unspecified psoriasis || id:finngen_R10_L12_PSORI_NAS	13	109811511	0.126443	7.17268e-06	200	Genus_Rothia_Dorsalforearm_Dry_PopGen || id:GCST90133240-1	2	TRUE	0.096099	21.0505
rs9901397	G	A	G	A	-0.46618	0.033613	0.615	0.580484	FALSE	FALSE	FALSE	17	14565848	0.0330238	399474	0.308753	Other and unspecified psoriasis || id:finngen_R10_L12_PSORI_NAS	17	14469165	0.101432	7.66165e-06	200	Genus_Rothia_Dorsalforearm_Dry_PopGen || id:GCST90133240-1	2	TRUE	0.0955269	20.912
rs1209	T	G	T	G	0.482444	0.0290846	0.594241	0.686679	FALSE	FALSE	FALSE	8	118193795	0.0352672	399474	0.409546	Other and unspecified psoriasis || id:finngen_R10_L12_PSORI_NAS	8	119206034	0.092764	5.13255e-07	191	Genus_Rothia_Volarforearm_Dry_PopGen || id:GCST90133240-2	2	TRUE	0.124046	26.7647
rs12279795	A	G	A	G	0.525157	0.00466327	0.730366	0.731046	FALSE	FALSE	FALSE	11	5985658	0.0368089	399474	0.899187	Other and unspecified psoriasis || id:finngen_R10_L12_PSORI_NAS	11	6006888	0.11347	6.83944e-06	191	Genus_Rothia_Volarforearm_Dry_PopGen || id:GCST90133240-2	2	TRUE	0.100838	21.1957
rs1369450	C	A	C	A	0.535759	-0.0210199	0.531414	0.528816	FALSE	FALSE	FALSE	8	130880476	0.0325869	399474	0.518902	Other and unspecified psoriasis || id:finngen_R10_L12_PSORI_NAS	8	131892722	0.1008	2.98489e-07	191	Genus_Rothia_Volarforearm_Dry_PopGen || id:GCST90133240-2	2	TRUE	0.128849	27.9544
rs2031959	T	G	T	G	-0.564889	0.0720139	0.790576	0.776381	FALSE	FALSE	FALSE	1	101246227	0.0391634	399474	0.0659432	Other and unspecified psoriasis || id:finngen_R10_L12_PSORI_NAS	1	101711783	0.117258	2.97445e-06	191	Genus_Rothia_Volarforearm_Dry_PopGen || id:GCST90133240-2	2	TRUE	0.108345	22.9653
rs6445168	C	T	C	T	0.53244	-0.0571007	0.746073	0.708649	FALSE	FALSE	FALSE	3	174432514	0.0358482	399474	0.111195	Other and unspecified psoriasis || id:finngen_R10_L12_PSORI_NAS	3	174150304	0.106336	1.26152e-06	191	Genus_Rothia_Volarforearm_Dry_PopGen || id:GCST90133240-2	2	TRUE	0.116034	24.8092
rs12369866	T	G	T	G	-0.702076	-0.0157864	0.875	0.928121	FALSE	FALSE	FALSE	12	89970087	0.0630616	399474	0.80233	Other and unspecified psoriasis || id:finngen_R10_L12_PSORI_NAS	12	90363864	0.139458	1.09158e-06	196	Genus_Kocuria_Dorsalforearm_Dry_PopGen || id:GCST90133241-1	2	TRUE	0.114501	25.0856
rs156472	T	G	T	G	0.498894	0.036267	0.581633	0.516726	FALSE	FALSE	FALSE	5	8738175	0.0329027	399474	0.270354	Other and unspecified psoriasis || id:finngen_R10_L12_PSORI_NAS	5	8738287	0.10298	2.58997e-06	196	Genus_Kocuria_Dorsalforearm_Dry_PopGen || id:GCST90133241-1	2	TRUE	0.106938	23.2302
rs7649275	A	G	A	G	0.626393	0.0489054	0.864796	0.91366	FALSE	FALSE	FALSE	3	53724676	0.0578221	399474	0.397669	Other and unspecified psoriasis || id:finngen_R10_L12_PSORI_NAS	3	53758703	0.134894	6.30175e-06	196	Genus_Kocuria_Dorsalforearm_Dry_PopGen || id:GCST90133241-1	2	TRUE	0.0991107	21.3428
rs10463984	G	A	G	A	-0.468649	0.0349009	0.634831	0.67182	FALSE	FALSE	FALSE	5	102541428	0.034721	399474	0.31481	Other and unspecified psoriasis || id:finngen_R10_L12_PSORI_NAS	5	101877132	0.102958	9.88845e-06	178	Genus_Kocuria_Volarforearm_Dry_PopGen || id:GCST90133241-2	2	TRUE	0.104265	20.4867
rs10513846	G	A	G	A	-0.683756	-0.00216328	0.848315	0.79912	FALSE	FALSE	FALSE	3	190313200	0.0410963	399474	0.958019	Other and unspecified psoriasis || id:finngen_R10_L12_PSORI_NAS	3	190030989	0.148938	8.37266e-06	178	Genus_Kocuria_Volarforearm_Dry_PopGen || id:GCST90133241-2	2	TRUE	0.10587	20.8394
rs12675846	G	A	G	A	-0.4841	0.0331885	0.662921	0.632119	FALSE	FALSE	FALSE	8	55934986	0.033908	399474	0.327688	Other and unspecified psoriasis || id:finngen_R10_L12_PSORI_NAS	8	56847545	0.103934	6.28001e-06	178	Genus_Kocuria_Volarforearm_Dry_PopGen || id:GCST90133241-2	2	TRUE	0.10864	21.4511
rs140375257	A	G	A	G	-0.856462	-0.0173588	0.924157	0.924297	FALSE	FALSE	FALSE	11	37207808	0.0612918	399474	0.777011	Other and unspecified psoriasis || id:finngen_R10_L12_PSORI_NAS	11	37229358	0.188005	9.73526e-06	178	Genus_Kocuria_Volarforearm_Dry_PopGen || id:GCST90133241-2	2	TRUE	0.104416	20.5198
rs2577903	A	G	A	G	-0.690154	-0.0296191	0.853933	0.824477	FALSE	FALSE	FALSE	8	64416956	0.043042	399474	0.491361	Other and unspecified psoriasis || id:finngen_R10_L12_PSORI_NAS	8	65329513	0.138762	1.55305e-06	178	Genus_Kocuria_Volarforearm_Dry_PopGen || id:GCST90133241-2	2	TRUE	0.122016	24.4591
rs2939848	C	T	C	T	-0.566564	-0.0426801	0.758427	0.752312	FALSE	FALSE	FALSE	15	90075849	0.0379082	399474	0.260217	Other and unspecified psoriasis || id:finngen_R10_L12_PSORI_NAS	15	90619081	0.118042	3.37898e-06	178	Genus_Kocuria_Volarforearm_Dry_PopGen || id:GCST90133241-2	2	TRUE	0.114591	22.7781
rs9944797	C	T	C	T	-0.531691	0.00855695	0.724719	0.687248	FALSE	FALSE	FALSE	18	14471770	0.0356181	399474	0.810143	Other and unspecified psoriasis || id:finngen_R10_L12_PSORI_NAS	18	14471769	0.115298	7.66689e-06	178	Genus_Kocuria_Volarforearm_Dry_PopGen || id:GCST90133241-2	2	TRUE	0.106719	21.0264
rs11619782	G	A	G	A	-0.762383	0.0149853	0.792	0.780367	FALSE	FALSE	FALSE	13	43030022	0.0392757	399474	0.702802	Other and unspecified psoriasis || id:finngen_R10_L12_PSORI_NAS	13	43604158	0.152957	2.0606e-06	125	Genus_Bacteroides_Antecubitalfossa_Moist_KORAFF4 || id:GCST90133291-1	2	TRUE	0.165795	24.4457
rs169074	A	T	A	T	-0.638267	-0.0126915	0.76	0.836397	FALSE	TRUE	FALSE	3	65874315	0.0442514	399474	0.774262	Other and unspecified psoriasis || id:finngen_R10_L12_PSORI_NAS	3	65859990	0.129337	2.5466e-06	125	Genus_Bacteroides_Antecubitalfossa_Moist_KORAFF4 || id:GCST90133291-1	2	TRUE	0.163058	23.9637
rs17032739	C	T	C	T	-0.858281	-0.0118697	0.884615	0.926493	FALSE	FALSE	FALSE	2	106272925	0.0625598	399474	0.849518	Other and unspecified psoriasis || id:finngen_R10_L12_PSORI_NAS	2	106889381	0.185616	9.07854e-06	130	Genus_Bacteroides_Antecubitalfossa_Moist_KORAFF4 || id:GCST90133291-1	2	TRUE	0.14124	21.0521
rs60838429	T	A	T	A	-1.13696	-0.0312972	0.937984	0.921942	FALSE	TRUE	FALSE	5	167926927	0.0609093	399474	0.60737	Other and unspecified psoriasis || id:finngen_R10_L12_PSORI_NAS	5	167353932	0.24545	8.83279e-06	129	Genus_Bacteroides_Antecubitalfossa_Moist_KORAFF4 || id:GCST90133291-1	2	TRUE	0.14261	21.124
rs61025394	G	A	G	A	-0.696151	-0.0372533	0.818548	0.732918	FALSE	FALSE	FALSE	6	7085584	0.0369164	399474	0.312914	Other and unspecified psoriasis || id:finngen_R10_L12_PSORI_NAS	6	7085817	0.149391	8.14172e-06	124	Genus_Bacteroides_Antecubitalfossa_Moist_KORAFF4 || id:GCST90133291-1	2	TRUE	0.149023	21.3647
rs6893166	G	T	G	T	1.07907	0.0138024	0.922481	0.892442	FALSE	FALSE	FALSE	5	143897836	0.0528526	399474	0.793979	Other and unspecified psoriasis || id:finngen_R10_L12_PSORI_NAS	5	143277401	0.225438	4.63663e-06	129	Genus_Bacteroides_Antecubitalfossa_Moist_KORAFF4 || id:GCST90133291-1	2	TRUE	0.150818	22.5557
rs737269	C	T	C	T	-0.759803	0.0210003	0.832	0.824629	FALSE	FALSE	FALSE	20	57047150	0.0428631	399474	0.624176	Other and unspecified psoriasis || id:finngen_R10_L12_PSORI_NAS	20	55622206	0.15672	3.68269e-06	125	Genus_Bacteroides_Antecubitalfossa_Moist_KORAFF4 || id:GCST90133291-1	2	TRUE	0.158275	23.1285
rs11067674	G	T	G	T	-1.13928	-0.0262199	0.952096	0.873518	FALSE	FALSE	FALSE	12	115605763	0.0491568	399474	0.593763	Other and unspecified psoriasis || id:finngen_R10_L12_PSORI_NAS	12	116043568	0.246003	7.33666e-06	167	Genus_Bacteroides_Antecubitalfossa_Moist_PopGen || id:GCST90133291-2	2	TRUE	0.113812	21.1907
rs12195413	G	A	G	A	-0.839351	0.00323769	0.91018	0.914406	FALSE	FALSE	FALSE	6	148225929	0.0583886	399474	0.955779	Other and unspecified psoriasis || id:finngen_R10_L12_PSORI_NAS	6	148547065	0.181404	7.46868e-06	167	Genus_Bacteroides_Antecubitalfossa_Moist_PopGen || id:GCST90133291-2	2	TRUE	0.11363	21.1525
rs472420	A	G	A	G	-0.76092	0.0623657	0.853293	0.887586	FALSE	FALSE	FALSE	11	130216443	0.0516698	399474	0.22743	Other and unspecified psoriasis || id:finngen_R10_L12_PSORI_NAS	11	130086338	0.153312	1.71473e-06	167	Genus_Bacteroides_Antecubitalfossa_Moist_PopGen || id:GCST90133291-2	2	TRUE	0.128545	24.3385
rs73053986	T	G	T	G	-0.572457	-0.00974156	0.658683	0.613623	FALSE	FALSE	FALSE	19	55748084	0.0334852	399474	0.771111	Other and unspecified psoriasis || id:finngen_R10_L12_PSORI_NAS	19	56259450	0.106539	2.59914e-07	167	Genus_Bacteroides_Antecubitalfossa_Moist_PopGen || id:GCST90133291-2	2	TRUE	0.1474	28.5256
rs74499983	C	G	C	G	-1.0168	-0.103793	0.946108	0.939309	FALSE	TRUE	FALSE	13	28959401	0.0683612	399474	0.128939	Other and unspecified psoriasis || id:finngen_R10_L12_PSORI_NAS	13	29533538	0.220258	7.8132e-06	167	Genus_Bacteroides_Antecubitalfossa_Moist_PopGen || id:GCST90133291-2	2	TRUE	0.11317	21.056
rs10887261	C	T	C	T	0.594577	0.037855	0.892405	0.874871	FALSE	FALSE	FALSE	10	84244513	0.0493779	399474	0.443296	Other and unspecified psoriasis || id:finngen_R10_L12_PSORI_NAS	10	86004269	0.130854	7.89023e-06	316	Genus_Staphylococcus_Antecubitalfossa_Moist_KORAFF4 || id:GCST90133293-1	2	TRUE	0.0613295	20.5157
rs113987257	A	G	A	G	0.660019	-0.0332989	0.916388	0.925263	FALSE	FALSE	FALSE	9	26350000	0.0623952	399474	0.593565	Other and unspecified psoriasis || id:finngen_R10_L12_PSORI_NAS	9	26349998	0.142847	5.71368e-06	299	Genus_Staphylococcus_Antecubitalfossa_Moist_KORAFF4 || id:GCST90133293-1	2	TRUE	0.066642	21.2059
rs11779071	G	C	G	C	-0.471313	-0.0348168	0.79288	0.771573	FALSE	TRUE	FALSE	8	22944485	0.0390611	399474	0.372746	Other and unspecified psoriasis || id:finngen_R10_L12_PSORI_NAS	8	22801998	0.096768	1.78518e-06	309	Genus_Staphylococcus_Antecubitalfossa_Moist_KORAFF4 || id:GCST90133293-1	2	TRUE	0.0712974	23.5687
rs12045182	G	A	G	A	0.374236	-0.0363216	0.539432	0.534583	FALSE	FALSE	FALSE	1	232406101	0.0326879	399474	0.266499	Other and unspecified psoriasis || id:finngen_R10_L12_PSORI_NAS	1	232541847	0.0824742	8.1025e-06	317	Genus_Staphylococcus_Antecubitalfossa_Moist_KORAFF4 || id:GCST90133293-1	2	TRUE	0.0609911	20.4601
rs12290684	G	C	G	C	0.685045	0.0280125	0.929022	0.958625	FALSE	TRUE	FALSE	11	86628032	0.0815279	399474	0.731151	Other and unspecified psoriasis || id:finngen_R10_L12_PSORI_NAS	11	86339074	0.145236	3.60616e-06	317	Genus_Staphylococcus_Antecubitalfossa_Moist_KORAFF4 || id:GCST90133293-1	2	TRUE	0.0655803	22.1076
rs2494995	A	C	A	C	0.559152	0.101349	0.830097	0.818338	FALSE	FALSE	FALSE	1	43556632	0.0421819	399474	0.0162757	Other and unspecified psoriasis || id:finngen_R10_L12_PSORI_NAS	1	44022303	0.103939	1.48264e-07	309	Genus_Staphylococcus_Antecubitalfossa_Moist_KORAFF4 || id:GCST90133293-1	2	TRUE	0.0856381	28.7533
rs643246	T	C	T	C	0.363698	0.0553169	0.5347	0.522009	FALSE	FALSE	FALSE	6	56399929	0.0326788	399474	0.0905045	Other and unspecified psoriasis || id:finngen_R10_L12_PSORI_NAS	6	56264727	0.0803639	8.54525e-06	317	Genus_Staphylococcus_Antecubitalfossa_Moist_KORAFF4 || id:GCST90133293-1	2	TRUE	0.0606891	20.3522
rs7255003	T	C	T	C	-0.533437	0.0652002	0.853312	0.873458	FALSE	FALSE	FALSE	19	51874382	0.0487743	399474	0.181296	Other and unspecified psoriasis || id:finngen_R10_L12_PSORI_NAS	19	52377635	0.112977	3.52635e-06	317	Genus_Staphylococcus_Antecubitalfossa_Moist_KORAFF4 || id:GCST90133293-1	2	TRUE	0.0657071	22.1534
rs10978947	G	A	G	A	0.696334	0.101576	0.916667	0.905443	FALSE	FALSE	FALSE	9	107624453	0.0562558	399474	0.070979	Other and unspecified psoriasis || id:finngen_R10_L12_PSORI_NAS	9	110386734	0.145654	2.94852e-06	258	Genus_Staphylococcus_Antecubitalfossa_Moist_PopGen || id:GCST90133293-2	2	TRUE	0.0813782	22.6783
rs12655553	A	G	A	G	0.474331	0.0131288	0.753876	0.775591	FALSE	FALSE	FALSE	5	169209636	0.0390437	399474	0.736675	Other and unspecified psoriasis || id:finngen_R10_L12_PSORI_NAS	5	168636640	0.102805	6.2524e-06	258	Genus_Staphylococcus_Antecubitalfossa_Moist_PopGen || id:GCST90133293-2	2	TRUE	0.076222	21.1229
rs1810081	A	C	A	C	-0.471502	0.00629452	0.790698	0.78882	FALSE	FALSE	FALSE	5	175568762	0.0400506	399474	0.875115	Other and unspecified psoriasis || id:finngen_R10_L12_PSORI_NAS	5	174995765	0.103936	8.80033e-06	258	Genus_Staphylococcus_Antecubitalfossa_Moist_PopGen || id:GCST90133293-2	2	TRUE	0.0738724	20.4198
rs1929699	T	C	T	C	-0.381115	-0.00433269	0.525194	0.581849	FALSE	FALSE	FALSE	10	120196028	0.0330423	399474	0.895676	Other and unspecified psoriasis || id:finngen_R10_L12_PSORI_NAS	10	121955540	0.0841813	9.15984e-06	258	Genus_Staphylococcus_Antecubitalfossa_Moist_PopGen || id:GCST90133293-2	2	TRUE	0.073597	20.3376
rs6772042	C	T	C	T	-0.506346	0.100525	0.765504	0.747828	FALSE	FALSE	FALSE	3	71372001	0.0381009	399474	0.0083301	Other and unspecified psoriasis || id:finngen_R10_L12_PSORI_NAS	3	71421152	0.0964791	3.22491e-07	258	Genus_Staphylococcus_Antecubitalfossa_Moist_PopGen || id:GCST90133293-2	2	TRUE	0.0964619	27.3306
rs72836640	T	C	T	C	0.567903	0.0549926	0.885659	0.869206	FALSE	FALSE	FALSE	17	40216894	0.0482592	399474	0.254484	Other and unspecified psoriasis || id:finngen_R10_L12_PSORI_NAS	17	38373146	0.125548	9.31836e-06	258	Genus_Staphylococcus_Antecubitalfossa_Moist_PopGen || id:GCST90133293-2	2	TRUE	0.073479	20.3024
rs74383656	G	A	G	A	0.759705	0.00136003	0.916667	0.915836	FALSE	FALSE	FALSE	4	123534463	0.0589389	399474	0.98159	Other and unspecified psoriasis || id:finngen_R10_L12_PSORI_NAS	4	124455618	0.161288	4.06103e-06	258	Genus_Staphylococcus_Antecubitalfossa_Moist_PopGen || id:GCST90133293-2	2	TRUE	0.079184	22.0143
rs78761638	G	A	G	A	0.700039	-0.040191	0.908915	0.909348	FALSE	FALSE	FALSE	1	91440545	0.0568447	399474	0.479547	Other and unspecified psoriasis || id:finngen_R10_L12_PSORI_NAS	1	91906102	0.141063	1.26996e-06	258	Genus_Staphylococcus_Antecubitalfossa_Moist_PopGen || id:GCST90133293-2	2	TRUE	0.0871375	24.4365
rs11025448	C	A	C	A	0.608709	0.0844547	0.890288	0.927415	FALSE	FALSE	FALSE	11	20224723	0.0628129	399474	0.178773	Other and unspecified psoriasis || id:finngen_R10_L12_PSORI_NAS	11	20246269	0.1327	6.82481e-06	278	Genus_Corynebacterium_Antecubitalfossa_Moist_KORAFF4 || id:GCST90133301-1	2	TRUE	0.0703638	20.8903
rs13134842	G	A	G	A	0.366546	0.0066211	0.542763	0.437231	FALSE	FALSE	FALSE	4	100600542	0.0329473	399474	0.84073	Other and unspecified psoriasis || id:finngen_R10_L12_PSORI_NAS	4	101521699	0.079958	6.67996e-06	304	Genus_Corynebacterium_Antecubitalfossa_Moist_KORAFF4 || id:GCST90133301-1	2	TRUE	0.0646589	20.8769
rs17091053	A	G	A	G	-0.778757	-0.0185415	0.944079	0.943222	FALSE	FALSE	FALSE	14	56127553	0.0705324	399474	0.792644	Other and unspecified psoriasis || id:finngen_R10_L12_PSORI_NAS	14	56594271	0.170154	6.90571e-06	304	Genus_Corynebacterium_Antecubitalfossa_Moist_KORAFF4 || id:GCST90133301-1	2	TRUE	0.0644629	20.8092
rs306635	T	G	T	G	-0.655388	0.0799789	0.90429	0.942391	FALSE	FALSE	FALSE	12	27467135	0.0696769	399474	0.251028	Other and unspecified psoriasis || id:finngen_R10_L12_PSORI_NAS	12	27620068	0.13219	1.1921e-06	303	Genus_Corynebacterium_Antecubitalfossa_Moist_KORAFF4 || id:GCST90133301-1	2	TRUE	0.0750382	24.4188
rs35994782	G	T	G	T	-0.551439	0.0318924	0.871237	0.797923	FALSE	FALSE	FALSE	3	107011760	0.0408618	399474	0.4351	Other and unspecified psoriasis || id:finngen_R10_L12_PSORI_NAS	3	106730607	0.121388	8.08289e-06	299	Genus_Corynebacterium_Antecubitalfossa_Moist_KORAFF4 || id:GCST90133301-1	2	TRUE	0.0645637	20.4989
rs7412359	G	A	G	A	-0.542931	0.0235495	0.887789	0.907913	FALSE	FALSE	FALSE	1	196863795	0.0571556	399474	0.680321	Other and unspecified psoriasis || id:finngen_R10_L12_PSORI_NAS	1	196832925	0.11833	6.56848e-06	303	Genus_Corynebacterium_Antecubitalfossa_Moist_KORAFF4 || id:GCST90133301-1	2	TRUE	0.0649652	20.9132
rs12455100	C	A	C	A	0.596853	-0.0471076	0.860465	0.811782	FALSE	FALSE	FALSE	18	67189995	0.0419738	399474	0.26173	Other and unspecified psoriasis || id:finngen_R10_L12_PSORI_NAS	18	64857232	0.124357	2.70599e-06	258	Genus_Corynebacterium_Antecubitalfossa_Moist_PopGen || id:GCST90133301-2	2	TRUE	0.081966	22.8568
rs13195974	G	A	G	A	0.410285	-0.0195271	0.589147	0.636065	FALSE	FALSE	FALSE	6	148313647	0.0338771	399474	0.564339	Other and unspecified psoriasis || id:finngen_R10_L12_PSORI_NAS	6	148634783	0.0858464	2.96818e-06	258	Genus_Corynebacterium_Antecubitalfossa_Moist_PopGen || id:GCST90133301-2	2	TRUE	0.0813327	22.6645
rs1548770	T	C	T	C	0.958658	0.0321975	0.947674	0.929059	FALSE	FALSE	FALSE	14	74219855	0.0641032	399474	0.615474	Other and unspecified psoriasis || id:finngen_R10_L12_PSORI_NAS	14	74686558	0.187056	5.86755e-07	258	Genus_Corynebacterium_Antecubitalfossa_Moist_PopGen || id:GCST90133301-2	2	TRUE	0.0923977	26.0619
rs1873242	T	C	T	C	0.434022	-0.00634926	0.507752	0.57959	FALSE	FALSE	FALSE	12	25368258	0.0331517	399474	0.848117	Other and unspecified psoriasis || id:finngen_R10_L12_PSORI_NAS	12	25521192	0.0884664	1.65433e-06	258	Genus_Corynebacterium_Antecubitalfossa_Moist_PopGen || id:GCST90133301-2	2	TRUE	0.0853318	23.8829
rs331602	C	T	C	T	0.489922	-0.0154794	0.777132	0.804078	FALSE	FALSE	FALSE	13	110555308	0.0413115	399474	0.707884	Other and unspecified psoriasis || id:finngen_R10_L12_PSORI_NAS	13	111207655	0.100347	1.84788e-06	258	Genus_Corynebacterium_Antecubitalfossa_Moist_PopGen || id:GCST90133301-2	2	TRUE	0.0845757	23.6517
rs3861473	T	C	T	C	0.422367	-0.00708666	0.686047	0.692464	FALSE	FALSE	FALSE	14	33305520	0.0352901	399474	0.840846	Other and unspecified psoriasis || id:finngen_R10_L12_PSORI_NAS	14	33774726	0.091087	5.6419e-06	258	Genus_Corynebacterium_Antecubitalfossa_Moist_PopGen || id:GCST90133301-2	2	TRUE	0.0769277	21.3347
rs4727933	T	C	T	C	-0.43541	0.0172587	0.5	0.520441	FALSE	FALSE	FALSE	7	121523674	0.0327111	399474	0.597771	Other and unspecified psoriasis || id:finngen_R10_L12_PSORI_NAS	7	121163728	0.09097	2.87457e-06	258	Genus_Corynebacterium_Antecubitalfossa_Moist_PopGen || id:GCST90133301-2	2	TRUE	0.0815522	22.7311
rs62228538	T	C	T	C	-0.678688	0.0201572	0.897287	0.947534	FALSE	FALSE	FALSE	3	25064628	0.0730386	399474	0.782562	Other and unspecified psoriasis || id:finngen_R10_L12_PSORI_NAS	3	25106119	0.145232	4.79901e-06	258	Genus_Corynebacterium_Antecubitalfossa_Moist_PopGen || id:GCST90133301-2	2	TRUE	0.0780385	21.6689
rs72877757	G	A	G	A	0.671747	0.0131492	0.885659	0.953096	FALSE	FALSE	FALSE	6	62547166	0.0766601	399474	0.863811	Other and unspecified psoriasis || id:finngen_R10_L12_PSORI_NAS	6	63257071	0.136507	1.5433e-06	258	Genus_Corynebacterium_Antecubitalfossa_Moist_PopGen || id:GCST90133301-2	2	TRUE	0.0858064	24.0282
rs13184329	G	A	G	A	-0.586449	0.054907	0.824895	0.82528	FALSE	FALSE	FALSE	5	58485148	0.0428236	399474	0.199785	Other and unspecified psoriasis || id:finngen_R10_L12_PSORI_NAS	5	57780975	0.116046	8.71517e-07	237	Genus_Enhydrobacter_Antecubitalfossa_Moist_KORAFF4 || id:GCST90133307-1	2	TRUE	0.0972761	25.3232
rs1380759	C	T	C	T	-0.411499	-0.00943542	0.649789	0.780315	FALSE	FALSE	FALSE	12	83756960	0.0394155	399474	0.810808	Other and unspecified psoriasis || id:finngen_R10_L12_PSORI_NAS	12	84150739	0.0890781	6.33909e-06	237	Genus_Enhydrobacter_Antecubitalfossa_Moist_KORAFF4 || id:GCST90133307-1	2	TRUE	0.0826046	21.16
rs2816456	A	G	A	G	0.417576	-0.00651281	0.607595	0.611555	FALSE	FALSE	FALSE	8	5991148	0.0335349	399474	0.846011	Other and unspecified psoriasis || id:finngen_R10_L12_PSORI_NAS	8	5848670	0.0914907	8.08751e-06	237	Genus_Enhydrobacter_Antecubitalfossa_Moist_KORAFF4 || id:GCST90133307-1	2	TRUE	0.0807943	20.6555
rs55979619	C	T	C	T	-0.570929	0.0338263	0.846983	0.917287	FALSE	FALSE	FALSE	12	115939584	0.0592656	399474	0.568164	Other and unspecified psoriasis || id:finngen_R10_L12_PSORI_NAS	12	116377389	0.12511	8.19222e-06	232	Genus_Enhydrobacter_Antecubitalfossa_Moist_KORAFF4 || id:GCST90133307-1	2	TRUE	0.082369	20.6454
rs6917797	A	G	A	G	-0.546826	0.00566407	0.824153	0.811092	FALSE	FALSE	FALSE	6	66482957	0.0417292	399474	0.892032	Other and unspecified psoriasis || id:finngen_R10_L12_PSORI_NAS	6	67192850	0.119158	7.26374e-06	236	Genus_Enhydrobacter_Antecubitalfossa_Moist_KORAFF4 || id:GCST90133307-1	2	TRUE	0.081925	20.8811
rs12447535	A	G	A	G	0.711953	0.00507494	0.896104	0.941848	FALSE	FALSE	FALSE	16	10584361	0.0698329	399474	0.942067	Other and unspecified psoriasis || id:finngen_R10_L12_PSORI_NAS	16	10678218	0.148703	3.02733e-06	231	Genus_Enhydrobacter_Antecubitalfossa_Moist_PopGen || id:GCST90133307-2	2	TRUE	0.0902734	22.724
rs12788198	G	C	G	C	0.725248	0.0536589	0.885281	0.895695	FALSE	TRUE	FALSE	11	22548259	0.0536839	399474	0.317536	Other and unspecified psoriasis || id:finngen_R10_L12_PSORI_NAS	11	22569805	0.139347	4.31825e-07	231	Genus_Enhydrobacter_Antecubitalfossa_Moist_PopGen || id:GCST90133307-2	2	TRUE	0.104956	26.8534
rs62140373	C	A	C	A	-0.6806	-0.0233972	0.91342	0.89099	FALSE	FALSE	FALSE	2	65022432	0.0524655	399474	0.655632	Other and unspecified psoriasis || id:finngen_R10_L12_PSORI_NAS	2	65249566	0.147251	6.34759e-06	231	Genus_Enhydrobacter_Antecubitalfossa_Moist_PopGen || id:GCST90133307-2	2	TRUE	0.0846525	21.1782
rs7919007	A	G	A	G	-0.4708	0.0182976	0.766234	0.763972	FALSE	FALSE	FALSE	10	23613094	0.0383631	399474	0.633393	Other and unspecified psoriasis || id:finngen_R10_L12_PSORI_NAS	10	23902023	0.103402	8.58749e-06	231	Genus_Enhydrobacter_Antecubitalfossa_Moist_PopGen || id:GCST90133307-2	2	TRUE	0.0823526	20.5512
rs10806229	C	A	C	A	-0.51008	-0.0259164	0.73399	0.698935	FALSE	FALSE	FALSE	6	81637672	0.0353909	399474	0.463993	Other and unspecified psoriasis || id:finngen_R10_L12_PSORI_NAS	6	82347389	0.106469	3.22053e-06	203	Genus_Micrococcus_Antecubitalfossa_Moist_KORAFF4 || id:GCST90133308-1	2	TRUE	0.101581	22.7264
rs11158204	C	T	C	T	0.611385	-0.00647482	0.770619	0.674809	FALSE	FALSE	FALSE	14	58377808	0.0347604	399474	0.852233	Other and unspecified psoriasis || id:finngen_R10_L12_PSORI_NAS	14	58844526	0.120115	8.50301e-07	194	Genus_Micrococcus_Antecubitalfossa_Moist_KORAFF4 || id:GCST90133308-1	2	TRUE	0.117813	25.6409
rs12222311	C	T	C	T	-0.765777	0.0151691	0.918719	0.907258	FALSE	FALSE	FALSE	11	80657217	0.0567114	399474	0.789102	Other and unspecified psoriasis || id:finngen_R10_L12_PSORI_NAS	11	80368261	0.166256	7.27654e-06	203	Genus_Micrococcus_Antecubitalfossa_Moist_KORAFF4 || id:GCST90133308-1	2	TRUE	0.0946207	21.0064
rs17093700	A	G	A	G	-0.517765	0.0363741	0.755	0.778703	FALSE	FALSE	FALSE	10	115876287	0.0391937	399474	0.353378	Other and unspecified psoriasis || id:finngen_R10_L12_PSORI_NAS	10	117635798	0.10895	3.85995e-06	200	Genus_Micrococcus_Antecubitalfossa_Moist_KORAFF4 || id:GCST90133308-1	2	TRUE	0.101464	22.3585
rs2055438	C	T	C	T	0.516538	-0.00418337	0.770936	0.699669	FALSE	FALSE	FALSE	5	82666969	0.0358468	399474	0.907097	Other and unspecified psoriasis || id:finngen_R10_L12_PSORI_NAS	5	81962788	0.113169	8.71796e-06	203	Genus_Micrococcus_Antecubitalfossa_Moist_KORAFF4 || id:GCST90133308-1	2	TRUE	0.093073	20.6275
rs35571573	C	T	C	T	-0.982347	-0.0859427	0.945545	0.896287	FALSE	FALSE	FALSE	4	29034219	0.0538764	399474	0.110671	Other and unspecified psoriasis || id:finngen_R10_L12_PSORI_NAS	4	29035841	0.198865	1.64814e-06	202	Genus_Micrococcus_Antecubitalfossa_Moist_KORAFF4 || id:GCST90133308-1	2	TRUE	0.10778	24.1598
rs492613	C	T	C	T	-0.789913	0.0444363	0.926108	0.879869	FALSE	FALSE	FALSE	13	26238185	0.0499798	399474	0.373957	Other and unspecified psoriasis || id:finngen_R10_L12_PSORI_NAS	13	26812322	0.172025	7.73779e-06	203	Genus_Micrococcus_Antecubitalfossa_Moist_KORAFF4 || id:GCST90133308-1	2	TRUE	0.0940945	20.8775
rs6493601	C	G	C	G	0.439218	-0.00937845	0.590206	0.645346	FALSE	TRUE	FALSE	15	52962935	0.0340655	399474	0.783082	Other and unspecified psoriasis || id:finngen_R10_L12_PSORI_NAS	15	53255132	0.0967354	9.89598e-06	194	Genus_Micrococcus_Antecubitalfossa_Moist_KORAFF4 || id:GCST90133308-1	2	TRUE	0.096057	20.4028
rs6719161	T	C	T	C	0.479327	0.0250028	0.619792	0.597188	FALSE	FALSE	FALSE	2	125635957	0.0332911	399474	0.452632	Other and unspecified psoriasis || id:finngen_R10_L12_PSORI_NAS	2	126393534	0.101653	4.66022e-06	192	Genus_Micrococcus_Antecubitalfossa_Moist_KORAFF4 || id:GCST90133308-1	2	TRUE	0.103786	22.0029
rs72784039	A	C	A	C	-0.624962	0.0128025	0.828283	0.810289	FALSE	FALSE	FALSE	5	118956584	0.0416224	399474	0.758396	Other and unspecified psoriasis || id:finngen_R10_L12_PSORI_NAS	5	118292279	0.126251	1.59433e-06	198	Genus_Micrococcus_Antecubitalfossa_Moist_KORAFF4 || id:GCST90133308-1	2	TRUE	0.110128	24.2564
rs72784256	C	T	C	T	-0.602782	0.0272104	0.812834	0.833722	FALSE	FALSE	FALSE	10	24562839	0.0440589	399474	0.536845	Other and unspecified psoriasis || id:finngen_R10_L12_PSORI_NAS	10	24851768	0.125208	3.06129e-06	187	Genus_Micrococcus_Antecubitalfossa_Moist_KORAFF4 || id:GCST90133308-1	2	TRUE	0.110274	22.9292
rs7395655	T	C	T	C	-0.429342	0.0393758	0.5	0.561311	FALSE	FALSE	FALSE	11	18645519	0.0329178	399474	0.231624	Other and unspecified psoriasis || id:finngen_R10_L12_PSORI_NAS	11	18667066	0.0915335	5.0273e-06	203	Genus_Micrococcus_Antecubitalfossa_Moist_KORAFF4 || id:GCST90133308-1	2	TRUE	0.0977824	21.7844
rs77411065	T	C	T	C	-0.702937	-0.0196905	0.898515	0.881382	FALSE	FALSE	FALSE	16	11739661	0.0502538	399474	0.695191	Other and unspecified psoriasis || id:finngen_R10_L12_PSORI_NAS	16	11833517	0.154833	9.70575e-06	202	Genus_Micrococcus_Antecubitalfossa_Moist_KORAFF4 || id:GCST90133308-1	2	TRUE	0.092589	20.4073
rs77649192	G	A	G	A	-0.832495	-0.0327359	0.91206	0.887316	FALSE	FALSE	FALSE	6	827999	0.0516127	399474	0.525911	Other and unspecified psoriasis || id:finngen_R10_L12_PSORI_NAS	6	827999	0.16702	1.35791e-06	199	Genus_Micrococcus_Antecubitalfossa_Moist_KORAFF4 || id:GCST90133308-1	2	TRUE	0.110989	24.5946
rs860049	A	G	A	G	0.605354	-0.0541941	0.841398	0.789298	FALSE	FALSE	FALSE	3	196664444	0.0402614	399474	0.178285	Other and unspecified psoriasis || id:finngen_R10_L12_PSORI_NAS	3	196391315	0.130375	6.5102e-06	186	Genus_Micrococcus_Antecubitalfossa_Moist_KORAFF4 || id:GCST90133308-1	2	TRUE	0.10387	21.3273
rs11031254	T	C	T	C	-0.53653	-0.00366174	0.686224	0.702617	FALSE	FALSE	FALSE	11	30971328	0.0357134	399474	0.918335	Other and unspecified psoriasis || id:finngen_R10_L12_PSORI_NAS	11	30992875	0.109241	1.91498e-06	196	Genus_Micrococcus_Antecubitalfossa_Moist_PopGen || id:GCST90133308-2	2	TRUE	0.109586	23.8763
rs112193157	G	A	G	A	-0.944418	-0.0994212	0.933673	0.937549	FALSE	FALSE	FALSE	18	50157167	0.0674008	399474	0.140192	Other and unspecified psoriasis || id:finngen_R10_L12_PSORI_NAS	18	47683537	0.195265	2.68425e-06	196	Genus_Micrococcus_Antecubitalfossa_Moist_PopGen || id:GCST90133308-2	2	TRUE	0.106624	23.1539
rs12028060	C	T	C	T	-0.520398	-0.0117197	0.696429	0.762595	FALSE	FALSE	FALSE	1	241707708	0.0385526	399474	0.761134	Other and unspecified psoriasis || id:finngen_R10_L12_PSORI_NAS	1	241871010	0.110556	4.77188e-06	196	Genus_Micrococcus_Antecubitalfossa_Moist_PopGen || id:GCST90133308-2	2	TRUE	0.101563	21.9306
rs13025632	T	C	T	C	-0.569477	0.0529768	0.788265	0.820851	FALSE	FALSE	FALSE	2	233222032	0.0429584	399474	0.217496	Other and unspecified psoriasis || id:finngen_R10_L12_PSORI_NAS	2	234130678	0.122406	6.06463e-06	196	Genus_Micrococcus_Antecubitalfossa_Moist_PopGen || id:GCST90133308-2	2	TRUE	0.0994492	21.4237
rs2930631	C	T	C	T	-0.661722	0.0270782	0.844388	0.852781	FALSE	FALSE	FALSE	15	25690474	0.0458444	399474	0.554752	Other and unspecified psoriasis || id:finngen_R10_L12_PSORI_NAS	15	25935621	0.130412	9.08048e-07	196	Genus_Micrococcus_Antecubitalfossa_Moist_PopGen || id:GCST90133308-2	2	TRUE	0.116107	25.4836
rs7081286	C	T	C	T	-0.423937	-0.0403636	0.563776	0.662353	FALSE	FALSE	FALSE	10	61871901	0.034541	399474	0.242577	Other and unspecified psoriasis || id:finngen_R10_L12_PSORI_NAS	10	63631660	0.0923977	8.01339e-06	196	Genus_Micrococcus_Antecubitalfossa_Moist_PopGen || id:GCST90133308-2	2	TRUE	0.0969881	20.8366
rs75650848	T	C	T	C	-0.831696	-0.219421	0.913265	0.97377	FALSE	FALSE	FALSE	10	107704657	0.101826	399474	0.0311738	Other and unspecified psoriasis || id:finngen_R10_L12_PSORI_NAS	10	109464415	0.16865	1.74837e-06	196	Genus_Micrococcus_Antecubitalfossa_Moist_PopGen || id:GCST90133308-2	2	TRUE	0.110384	24.0715
rs10908733	T	A	T	A	-0.636085	-0.0632168	0.895582	0.860895	FALSE	TRUE	FALSE	1	159534264	0.0469522	399474	0.178171	Other and unspecified psoriasis || id:finngen_R10_L12_PSORI_NAS	1	159504054	0.140053	8.72745e-06	249	Genus_Streptococcus_Antecubitalfossa_Moist_KORAFF4 || id:GCST90133309-1	2	TRUE	0.0765036	20.4618
rs11119610	C	G	C	G	-0.404399	-0.0219867	0.623016	0.632703	FALSE	TRUE	FALSE	1	210824026	0.0339377	399474	0.517078	Other and unspecified psoriasis || id:finngen_R10_L12_PSORI_NAS	1	210997368	0.0855828	3.83824e-06	252	Genus_Streptococcus_Antecubitalfossa_Moist_KORAFF4 || id:GCST90133309-1	2	TRUE	0.081391	22.1506
rs11177899	T	G	T	G	0.49936	-0.0698977	0.804	0.883418	FALSE	FALSE	FALSE	12	69847593	0.0508441	399474	0.16921	Other and unspecified psoriasis || id:finngen_R10_L12_PSORI_NAS	12	70241373	0.110577	9.75205e-06	250	Genus_Streptococcus_Antecubitalfossa_Moist_KORAFF4 || id:GCST90133309-1	2	TRUE	0.0754226	20.2307
rs116139915	T	C	T	C	-0.815592	0.0983805	0.927419	0.870126	FALSE	FALSE	FALSE	9	4787922	0.0486257	399474	0.0430507	Other and unspecified psoriasis || id:finngen_R10_L12_PSORI_NAS	9	4787922	0.160324	7.21451e-07	248	Genus_Streptococcus_Antecubitalfossa_Moist_KORAFF4 || id:GCST90133309-1	2	TRUE	0.0944914	25.6705
rs1370396	C	A	C	A	0.431655	0.0330158	0.719368	0.761736	FALSE	FALSE	FALSE	15	59832064	0.0383461	399474	0.389242	Other and unspecified psoriasis || id:finngen_R10_L12_PSORI_NAS	15	60124263	0.0926483	5.15706e-06	253	Genus_Streptococcus_Antecubitalfossa_Moist_KORAFF4 || id:GCST90133309-1	2	TRUE	0.0790187	21.5354
rs165614	A	C	A	C	-0.489596	-0.0349943	0.792181	0.802934	FALSE	FALSE	FALSE	22	20581386	0.0409672	399474	0.392992	Other and unspecified psoriasis || id:finngen_R10_L12_PSORI_NAS	22	20935673	0.106334	6.69993e-06	243	Genus_Streptococcus_Antecubitalfossa_Moist_KORAFF4 || id:GCST90133309-1	2	TRUE	0.0802423	21.0255
rs1952634	T	C	T	C	0.797111	0.0511486	0.936759	0.938427	FALSE	FALSE	FALSE	9	24534501	0.0680696	399474	0.452403	Other and unspecified psoriasis || id:finngen_R10_L12_PSORI_NAS	9	24534499	0.168803	3.88497e-06	253	Genus_Streptococcus_Antecubitalfossa_Moist_KORAFF4 || id:GCST90133309-1	2	TRUE	0.0809974	22.1222
rs2055943	C	A	C	A	-0.446849	0.0991558	0.703187	0.804809	FALSE	FALSE	FALSE	4	46965262	0.0412431	399474	0.0162088	Other and unspecified psoriasis || id:finngen_R10_L12_PSORI_NAS	4	46967279	0.0966155	6.02393e-06	251	Genus_Streptococcus_Antecubitalfossa_Moist_KORAFF4 || id:GCST90133309-1	2	TRUE	0.0785299	21.2204
rs2904413	G	A	G	A	-0.39296	0.0342093	0.511858	0.483597	FALSE	FALSE	FALSE	15	79244098	0.0327172	399474	0.295743	Other and unspecified psoriasis || id:finngen_R10_L12_PSORI_NAS	15	79536440	0.0817426	2.63767e-06	253	Genus_Streptococcus_Antecubitalfossa_Moist_KORAFF4 || id:GCST90133309-1	2	TRUE	0.0836987	22.9274
rs71641023	A	C	A	C	-0.930854	0.0486492	0.933198	0.914158	FALSE	FALSE	FALSE	5	94689342	0.0585502	399474	0.406033	Other and unspecified psoriasis || id:finngen_R10_L12_PSORI_NAS	5	94025047	0.164223	4.04246e-08	247	Genus_Streptococcus_Antecubitalfossa_Moist_KORAFF4 || id:GCST90133309-1	2	TRUE	0.115104	31.8686
rs11762959	A	G	A	G	0.472064	0.0281218	0.531401	0.52325	FALSE	FALSE	FALSE	7	57301973	0.0326355	399474	0.388856	Other and unspecified psoriasis || id:finngen_R10_L12_PSORI_NAS	7	57369680	0.0928814	8.37308e-07	207	Genus_Streptococcus_Antecubitalfossa_Moist_PopGen || id:GCST90133309-2	2	TRUE	0.110944	25.5816
rs198196	A	G	A	G	-0.508445	-0.0400518	0.751208	0.80719	FALSE	FALSE	FALSE	16	24116422	0.0414013	399474	0.333343	Other and unspecified psoriasis || id:finngen_R10_L12_PSORI_NAS	16	24127743	0.105762	2.95421e-06	207	Genus_Streptococcus_Antecubitalfossa_Moist_PopGen || id:GCST90133309-2	2	TRUE	0.100436	22.8881
rs6597674	G	A	G	A	-0.503908	-0.0515966	0.743961	0.734897	FALSE	FALSE	FALSE	9	131062557	0.036998	399474	0.163142	Other and unspecified psoriasis || id:finngen_R10_L12_PSORI_NAS	9	133937944	0.104441	2.73198e-06	207	Genus_Streptococcus_Antecubitalfossa_Moist_PopGen || id:GCST90133309-2	2	TRUE	0.10109	23.0539
rs7741846	G	A	G	A	-0.437819	-0.0038612	0.60628	0.578644	FALSE	FALSE	FALSE	6	132614922	0.0330017	399474	0.90686	Other and unspecified psoriasis || id:finngen_R10_L12_PSORI_NAS	6	132936061	0.0905596	2.61415e-06	207	Genus_Streptococcus_Antecubitalfossa_Moist_PopGen || id:GCST90133309-2	2	TRUE	0.101459	23.1475
rs7777658	C	T	C	T	-0.862069	-0.0528719	0.917874	0.917532	FALSE	FALSE	FALSE	7	19662932	0.0594042	399474	0.373446	Other and unspecified psoriasis || id:finngen_R10_L12_PSORI_NAS	7	19702555	0.164306	3.84997e-07	207	Genus_Streptococcus_Antecubitalfossa_Moist_PopGen || id:GCST90133309-2	2	TRUE	0.117377	27.2623
rs9392171	C	T	C	T	-0.577249	0.0622975	0.826087	0.795994	FALSE	FALSE	FALSE	6	7663412	0.040453	399474	0.123561	Other and unspecified psoriasis || id:finngen_R10_L12_PSORI_NAS	6	7663645	0.121072	3.52787e-06	207	Genus_Streptococcus_Antecubitalfossa_Moist_PopGen || id:GCST90133309-2	2	TRUE	0.0989501	22.5124
rs9994801	A	G	A	G	0.432942	-0.0242175	0.524155	0.511491	FALSE	FALSE	FALSE	4	90910362	0.0327167	399474	0.459167	Other and unspecified psoriasis || id:finngen_R10_L12_PSORI_NAS	4	91831513	0.094146	7.43619e-06	207	Genus_Streptococcus_Antecubitalfossa_Moist_PopGen || id:GCST90133309-2	2	TRUE	0.0926916	20.943
rs11646200	G	A	G	A	0.667922	0.120177	0.702899	0.819123	FALSE	FALSE	FALSE	16	84302146	0.183638	397665	0.51284	Generalized pustular psoriasis || id:finngen_R10_L12_PSORI_PUSTGEN	16	84335752	0.130705	1.06832e-06	138	Genus_Chryseobacterium_Antecubitalfossa_Moist_KORAFF4 || id:GCST90133164-1	2	TRUE	0.159119	25.735
rs12515495	A	G	A	G	-0.621405	-0.0571075	0.704225	0.628397	FALSE	FALSE	FALSE	5	115984410	0.146039	397665	0.695766	Generalized pustular psoriasis || id:finngen_R10_L12_PSORI_PUSTGEN	5	115320107	0.117256	4.40912e-07	142	Genus_Chryseobacterium_Antecubitalfossa_Moist_KORAFF4 || id:GCST90133164-1	2	TRUE	0.165126	27.69
rs1426471	C	T	C	T	0.765605	0.225893	0.855634	0.875886	FALSE	FALSE	FALSE	7	136257651	0.212381	397665	0.287501	Generalized pustular psoriasis || id:finngen_R10_L12_PSORI_PUSTGEN	7	135942399	0.160728	4.70421e-06	142	Genus_Chryseobacterium_Antecubitalfossa_Moist_KORAFF4 || id:GCST90133164-1	2	TRUE	0.137771	22.3699
rs1496033	T	C	T	C	-0.582204	0.099771	0.625	0.545241	FALSE	FALSE	FALSE	6	147350697	0.141653	397665	0.481226	Generalized pustular psoriasis || id:finngen_R10_L12_PSORI_PUSTGEN	6	147671833	0.120958	3.84634e-06	140	Genus_Chryseobacterium_Antecubitalfossa_Moist_KORAFF4 || id:GCST90133164-1	2	TRUE	0.141987	22.8367
rs1569814	T	C	T	C	-0.699088	-0.140128	0.822695	0.7252	FALSE	FALSE	FALSE	20	15637185	0.157308	397665	0.373041	Generalized pustular psoriasis || id:finngen_R10_L12_PSORI_PUSTGEN	20	15617830	0.147986	5.59279e-06	141	Genus_Chryseobacterium_Antecubitalfossa_Moist_KORAFF4 || id:GCST90133164-1	2	TRUE	0.136645	21.9997
rs35079835	T	C	T	C	-0.968924	-0.171509	0.912409	0.913057	FALSE	FALSE	FALSE	1	84767500	0.25251	397665	0.497001	Generalized pustular psoriasis || id:finngen_R10_L12_PSORI_PUSTGEN	1	85233183	0.210286	9.32118e-06	137	Genus_Chryseobacterium_Antecubitalfossa_Moist_KORAFF4 || id:GCST90133164-1	2	TRUE	0.134174	20.9205
rs67293833	A	C	A	C	-1.44357	0.141947	0.957447	0.898392	FALSE	FALSE	FALSE	15	60050655	0.233517	397665	0.543278	Generalized pustular psoriasis || id:finngen_R10_L12_PSORI_PUSTGEN	15	60342854	0.273282	4.80967e-07	141	Genus_Chryseobacterium_Antecubitalfossa_Moist_KORAFF4 || id:GCST90133164-1	2	TRUE	0.165202	27.5073
rs7152314	C	T	C	T	-0.991937	0.22488	0.919014	0.916918	FALSE	FALSE	FALSE	14	55709294	0.257512	397665	0.38251	Generalized pustular psoriasis || id:finngen_R10_L12_PSORI_PUSTGEN	14	56176012	0.211239	6.26616e-06	142	Genus_Chryseobacterium_Antecubitalfossa_Moist_KORAFF4 || id:GCST90133164-1	2	TRUE	0.134413	21.74
rs74132009	T	G	T	G	-0.904896	-0.153879	0.910714	0.935121	FALSE	FALSE	FALSE	10	51420462	0.285621	397665	0.590057	Generalized pustular psoriasis || id:finngen_R10_L12_PSORI_PUSTGEN	10	53180222	0.196121	8.9317e-06	140	Genus_Chryseobacterium_Antecubitalfossa_Moist_KORAFF4 || id:GCST90133164-1	2	TRUE	0.131991	20.9845
rs79777996	C	T	C	T	-1.11713	0.229386	0.938462	0.930417	FALSE	FALSE	FALSE	5	105657094	0.279185	397665	0.41129	Generalized pustular psoriasis || id:finngen_R10_L12_PSORI_PUSTGEN	5	104992795	0.239871	7.9108e-06	130	Genus_Chryseobacterium_Antecubitalfossa_Moist_KORAFF4 || id:GCST90133164-1	2	TRUE	0.142987	21.356
rs79778624	A	G	A	G	-1.0081	0.147528	0.929078	0.965461	FALSE	FALSE	FALSE	3	61078195	0.387427	397665	0.703359	Generalized pustular psoriasis || id:finngen_R10_L12_PSORI_PUSTGEN	3	61063868	0.211638	4.73253e-06	141	Genus_Chryseobacterium_Antecubitalfossa_Moist_KORAFF4 || id:GCST90133164-1	2	TRUE	0.138612	22.3674
rs11643968	G	A	G	A	-0.666472	-0.176808	0.818841	0.712569	FALSE	FALSE	FALSE	16	84258409	0.155056	397665	0.254169	Generalized pustular psoriasis || id:finngen_R10_L12_PSORI_PUSTGEN	16	84292015	0.142171	6.6302e-06	138	Genus_Chryseobacterium_Antecubitalfossa_Moist_PopGen || id:GCST90133164-2	2	TRUE	0.137369	21.6572
rs11742607	A	G	A	G	-0.593827	0.00685286	0.746377	0.786789	FALSE	FALSE	FALSE	5	173539048	0.171989	397665	0.968217	Generalized pustular psoriasis || id:finngen_R10_L12_PSORI_PUSTGEN	5	172966051	0.127046	7.02367e-06	138	Genus_Chryseobacterium_Antecubitalfossa_Moist_PopGen || id:GCST90133164-2	2	TRUE	0.136675	21.5305
rs1350519	G	A	G	A	-0.644135	-0.164278	0.75	0.733976	FALSE	FALSE	FALSE	12	75187221	0.159581	397665	0.303277	Generalized pustular psoriasis || id:finngen_R10_L12_PSORI_PUSTGEN	12	75581001	0.138013	7.22974e-06	138	Genus_Chryseobacterium_Antecubitalfossa_Moist_PopGen || id:GCST90133164-2	2	TRUE	0.136327	21.467
rs28794896	G	A	G	A	-1.16864	-0.11909	0.945652	0.945795	FALSE	FALSE	FALSE	18	3144150	0.313974	397665	0.704468	Generalized pustular psoriasis || id:finngen_R10_L12_PSORI_PUSTGEN	18	3144148	0.252015	8.1964e-06	138	Genus_Chryseobacterium_Antecubitalfossa_Moist_PopGen || id:GCST90133164-2	2	TRUE	0.134815	21.1919
rs3779412	T	C	T	C	-0.95953	-0.104538	0.902174	0.895223	FALSE	FALSE	FALSE	7	74210798	0.230894	397665	0.650726	Generalized pustular psoriasis || id:finngen_R10_L12_PSORI_PUSTGEN	7	73625128	0.177393	2.76913e-07	138	Genus_Chryseobacterium_Antecubitalfossa_Moist_PopGen || id:GCST90133164-2	2	TRUE	0.174928	28.834
rs4614053	T	C	T	C	0.546075	-0.258268	0.550725	0.546583	FALSE	FALSE	FALSE	9	8726343	0.141277	397665	0.0675367	Generalized pustular psoriasis || id:finngen_R10_L12_PSORI_PUSTGEN	9	8726343	0.110212	2.11522e-06	138	Genus_Chryseobacterium_Antecubitalfossa_Moist_PopGen || id:GCST90133164-2	2	TRUE	0.15103	24.194
rs58092190	C	T	C	T	-0.816789	-0.0323268	0.894928	0.913694	FALSE	FALSE	FALSE	13	26860278	0.252876	397665	0.898278	Generalized pustular psoriasis || id:finngen_R10_L12_PSORI_PUSTGEN	13	27434415	0.177887	9.9072e-06	138	Genus_Chryseobacterium_Antecubitalfossa_Moist_PopGen || id:GCST90133164-2	2	TRUE	0.132529	20.7775
rs6842379	T	C	T	C	0.534112	-0.195786	0.496377	0.574217	FALSE	FALSE	FALSE	4	79685589	0.143582	397665	0.1727	Generalized pustular psoriasis || id:finngen_R10_L12_PSORI_PUSTGEN	4	80606743	0.106652	1.67653e-06	138	Genus_Chryseobacterium_Antecubitalfossa_Moist_PopGen || id:GCST90133164-2	2	TRUE	0.153789	24.7164
rs75794610	C	A	C	A	-1.14969	0.0941382	0.934783	0.956942	FALSE	FALSE	FALSE	3	12087576	0.34434	397665	0.784556	Generalized pustular psoriasis || id:finngen_R10_L12_PSORI_PUSTGEN	3	12129076	0.230452	1.82285e-06	138	Genus_Chryseobacterium_Antecubitalfossa_Moist_PopGen || id:GCST90133164-2	2	TRUE	0.152796	24.5281
rs7605658	C	T	C	T	-0.577245	0.158542	0.550725	0.568743	FALSE	FALSE	FALSE	2	45183783	0.14245	397665	0.265722	Generalized pustular psoriasis || id:finngen_R10_L12_PSORI_PUSTGEN	2	45410922	0.113037	1.08474e-06	138	Genus_Chryseobacterium_Antecubitalfossa_Moist_PopGen || id:GCST90133164-2	2	TRUE	0.158939	25.7004
rs9490285	T	C	T	C	0.77701	0.501398	0.851449	0.883183	FALSE	FALSE	FALSE	6	121470947	0.220666	397665	0.0230744	Generalized pustular psoriasis || id:finngen_R10_L12_PSORI_PUSTGEN	6	121792093	0.165738	6.62032e-06	138	Genus_Chryseobacterium_Antecubitalfossa_Moist_PopGen || id:GCST90133164-2	2	TRUE	0.137387	21.6604
rs1028134	T	C	T	C	-0.628993	-0.422293	0.891051	0.896151	FALSE	FALSE	FALSE	16	27117364	0.233498	397665	0.0705212	Generalized pustular psoriasis || id:finngen_R10_L12_PSORI_PUSTGEN	16	27128685	0.129623	2.12556e-06	257	Genus_Acinetobacter_Antecubitalfossa_Moist_KORAFF4 || id:GCST90133165-1	2	TRUE	0.0839304	23.3631
rs145093695	C	T	C	T	-0.606542	0.110455	0.866667	0.837405	FALSE	FALSE	FALSE	6	131325769	0.191009	397665	0.563081	Generalized pustular psoriasis || id:finngen_R10_L12_PSORI_PUSTGEN	6	131646909	0.130782	5.6504e-06	255	Genus_Acinetobacter_Antecubitalfossa_Moist_KORAFF4 || id:GCST90133165-1	2	TRUE	0.0777883	21.3405
rs6027039	C	T	C	T	-0.428276	0.0352159	0.730189	0.721053	FALSE	FALSE	FALSE	20	38649915	0.157022	397665	0.822544	Generalized pustular psoriasis || id:finngen_R10_L12_PSORI_PUSTGEN	20	37278558	0.0918919	5.01426e-06	265	Genus_Acinetobacter_Antecubitalfossa_Moist_KORAFF4 || id:GCST90133165-1	2	TRUE	0.0757589	21.5578
rs7138651	G	A	G	A	0.456525	0.196413	0.709924	0.805196	FALSE	FALSE	FALSE	12	81859836	0.178963	397665	0.272419	Generalized pustular psoriasis || id:finngen_R10_L12_PSORI_PUSTGEN	12	82253615	0.0937787	1.95714e-06	262	Genus_Acinetobacter_Antecubitalfossa_Moist_KORAFF4 || id:GCST90133165-1	2	TRUE	0.0829494	23.5176
rs72978489	A	T	A	T	0.833633	-0.713517	0.94186	0.967056	FALSE	TRUE	FALSE	4	157090718	0.392475	397665	0.0690653	Generalized pustular psoriasis || id:finngen_R10_L12_PSORI_PUSTGEN	4	158011870	0.177532	4.33649e-06	258	Genus_Acinetobacter_Antecubitalfossa_Moist_KORAFF4 || id:GCST90133165-1	2	TRUE	0.0787338	21.8784
rs1026059	A	G	A	G	0.487648	0.0202003	0.608374	0.655449	FALSE	FALSE	FALSE	12	127312430	0.149121	397665	0.892246	Generalized pustular psoriasis || id:finngen_R10_L12_PSORI_PUSTGEN	12	127796975	0.0972471	1.16494e-06	203	Genus_Acinetobacter_Antecubitalfossa_Moist_PopGen || id:GCST90133165-2	2	TRUE	0.110217	24.8977
rs10411016	G	T	G	T	0.426591	0.208168	0.541872	0.537344	FALSE	FALSE	FALSE	19	7680157	0.142093	397665	0.142919	Generalized pustular psoriasis || id:finngen_R10_L12_PSORI_PUSTGEN	19	7745043	0.0926989	7.408e-06	203	Genus_Acinetobacter_Antecubitalfossa_Moist_PopGen || id:GCST90133165-2	2	TRUE	0.0944674	20.9688
rs1045502	G	A	G	A	-0.807112	0.0141431	0.923645	0.870543	FALSE	FALSE	FALSE	11	252818	0.209231	397665	0.946108	Generalized pustular psoriasis || id:finngen_R10_L12_PSORI_PUSTGEN	11	252818	0.177664	9.56004e-06	203	Genus_Acinetobacter_Antecubitalfossa_Moist_PopGen || id:GCST90133165-2	2	TRUE	0.0922828	20.4346
rs116626252	G	T	G	T	-0.702901	-0.103886	0.884236	0.900038	FALSE	FALSE	FALSE	2	115566882	0.234676	397665	0.657999	Generalized pustular psoriasis || id:finngen_R10_L12_PSORI_PUSTGEN	2	116324458	0.152812	7.47656e-06	203	Genus_Acinetobacter_Antecubitalfossa_Moist_PopGen || id:GCST90133165-2	2	TRUE	0.0943886	20.9495
rs1588687	A	G	A	G	0.493178	-0.0331938	0.704433	0.778838	FALSE	FALSE	FALSE	12	17288543	0.168709	397665	0.844022	Generalized pustular psoriasis || id:finngen_R10_L12_PSORI_PUSTGEN	12	17441477	0.107499	7.8779e-06	203	Genus_Acinetobacter_Antecubitalfossa_Moist_PopGen || id:GCST90133165-2	2	TRUE	0.0939409	20.8398
rs3012557	A	G	A	G	-0.502324	-0.197771	0.665025	0.611439	FALSE	FALSE	FALSE	6	73862086	0.14413	397665	0.170009	Generalized pustular psoriasis || id:finngen_R10_L12_PSORI_PUSTGEN	6	74571797	0.107426	5.35897e-06	203	Genus_Acinetobacter_Antecubitalfossa_Moist_PopGen || id:GCST90133165-2	2	TRUE	0.0972366	21.6497
rs6832067	T	C	T	C	0.466514	-0.170782	0.593596	0.529143	FALSE	FALSE	FALSE	4	186402766	0.141739	397665	0.228241	Generalized pustular psoriasis || id:finngen_R10_L12_PSORI_PUSTGEN	4	187323920	0.097513	3.31931e-06	203	Genus_Acinetobacter_Antecubitalfossa_Moist_PopGen || id:GCST90133165-2	2	TRUE	0.101324	22.6623
rs7084649	T	C	T	C	-0.845772	0.249831	0.933498	0.952968	FALSE	FALSE	FALSE	10	95411774	0.33696	397665	0.458435	Generalized pustular psoriasis || id:finngen_R10_L12_PSORI_PUSTGEN	10	97171531	0.17982	4.74929e-06	203	Genus_Acinetobacter_Antecubitalfossa_Moist_PopGen || id:GCST90133165-2	2	TRUE	0.0982682	21.9044
rs10132025	G	A	G	A	-0.617809	-0.0191548	0.828652	0.847025	FALSE	FALSE	FALSE	14	33323423	0.197081	397665	0.922574	Generalized pustular psoriasis || id:finngen_R10_L12_PSORI_PUSTGEN	14	33792629	0.133178	6.8107e-06	178	Genus_Paracoccus_Antecubitalfossa_Moist_KORAFF4 || id:GCST90133166-1	2	TRUE	0.107859	21.2783
rs118128871	A	C	A	C	-0.957354	-0.11799	0.936416	0.964214	FALSE	FALSE	FALSE	8	64955211	0.381314	397665	0.756995	Generalized pustular psoriasis || id:finngen_R10_L12_PSORI_PUSTGEN	8	65867446	0.204565	5.81229e-06	173	Genus_Paracoccus_Antecubitalfossa_Moist_KORAFF4 || id:GCST90133166-1	2	TRUE	0.112374	21.6487
rs1991250	T	C	T	C	-0.482753	0.0277701	0.641618	0.64086	FALSE	FALSE	FALSE	15	59947613	0.146499	397665	0.849656	Generalized pustular psoriasis || id:finngen_R10_L12_PSORI_PUSTGEN	15	60239812	0.10437	7.35012e-06	173	Genus_Paracoccus_Antecubitalfossa_Moist_KORAFF4 || id:GCST90133166-1	2	TRUE	0.110057	21.1471
rs2176664	C	T	C	T	-0.52228	-0.107768	0.716667	0.614835	FALSE	FALSE	FALSE	17	12616554	0.14461	397665	0.456131	Generalized pustular psoriasis || id:finngen_R10_L12_PSORI_PUSTGEN	17	12519871	0.113884	8.49046e-06	180	Genus_Paracoccus_Antecubitalfossa_Moist_KORAFF4 || id:GCST90133166-1	2	TRUE	0.10462	20.7983
rs2767625	A	G	A	G	0.558512	0.0212747	0.535928	0.366389	FALSE	FALSE	FALSE	10	29969685	0.14715	397665	0.885044	Generalized pustular psoriasis || id:finngen_R10_L12_PSORI_PUSTGEN	10	30258614	0.109799	9.81757e-07	167	Genus_Paracoccus_Antecubitalfossa_Moist_KORAFF4 || id:GCST90133166-1	2	TRUE	0.134151	25.5643
rs759572	C	T	C	T	0.521608	0.0316411	0.636111	0.523849	FALSE	FALSE	FALSE	12	97089257	0.141315	397665	0.822831	Generalized pustular psoriasis || id:finngen_R10_L12_PSORI_PUSTGEN	12	97483035	0.110784	5.00675e-06	180	Genus_Paracoccus_Antecubitalfossa_Moist_KORAFF4 || id:GCST90133166-1	2	TRUE	0.109653	21.922
rs113280186	A	C	A	C	-0.662469	-0.38751	0.872283	0.887917	FALSE	FALSE	FALSE	9	18218509	0.221749	397665	0.0805471	Generalized pustular psoriasis || id:finngen_R10_L12_PSORI_PUSTGEN	9	18218507	0.141997	5.95156e-06	184	Genus_Paracoccus_Antecubitalfossa_Moist_PopGen || id:GCST90133166-2	2	TRUE	0.10578	21.5292
rs11711418	G	A	G	A	-0.453469	0.314119	0.535326	0.52461	FALSE	FALSE	FALSE	3	8498999	0.141205	397665	0.0261108	Generalized pustular psoriasis || id:finngen_R10_L12_PSORI_PUSTGEN	3	8540685	0.0994445	9.36987e-06	184	Genus_Paracoccus_Antecubitalfossa_Moist_PopGen || id:GCST90133166-2	2	TRUE	0.101535	20.5678
rs12537030	A	G	A	G	0.72322	0.0938767	0.869565	0.877696	FALSE	FALSE	FALSE	7	116191853	0.213105	397665	0.659563	Generalized pustular psoriasis || id:finngen_R10_L12_PSORI_PUSTGEN	7	115831907	0.151734	3.82582e-06	184	Genus_Paracoccus_Antecubitalfossa_Moist_PopGen || id:GCST90133166-2	2	TRUE	0.1099	22.4714
rs1565556	C	T	C	T	-0.511289	0.113984	0.722826	0.716088	FALSE	FALSE	FALSE	3	70547534	0.156496	397665	0.4664	Generalized pustular psoriasis || id:finngen_R10_L12_PSORI_PUSTGEN	3	70596685	0.105329	2.59106e-06	184	Genus_Paracoccus_Antecubitalfossa_Moist_PopGen || id:GCST90133166-2	2	TRUE	0.113523	23.3071
rs35978580	G	A	G	A	-0.67742	0.232022	0.861413	0.808049	FALSE	FALSE	FALSE	15	80737220	0.178302	397665	0.193161	Generalized pustular psoriasis || id:finngen_R10_L12_PSORI_PUSTGEN	15	81029561	0.141851	3.67365e-06	184	Genus_Paracoccus_Antecubitalfossa_Moist_PopGen || id:GCST90133166-2	2	TRUE	0.110278	22.5582
rs453604	A	G	A	G	-0.639573	-0.137228	0.820652	0.788332	FALSE	FALSE	FALSE	1	40344186	0.172711	397665	0.426873	Generalized pustular psoriasis || id:finngen_R10_L12_PSORI_PUSTGEN	1	40809858	0.127676	1.28594e-06	184	Genus_Paracoccus_Antecubitalfossa_Moist_PopGen || id:GCST90133166-2	2	TRUE	0.120012	24.8209
rs7582082	A	C	A	C	0.479833	0.0238832	0.57337	0.521311	FALSE	FALSE	FALSE	2	138221758	0.141374	397665	0.865847	Generalized pustular psoriasis || id:finngen_R10_L12_PSORI_PUSTGEN	2	138979328	0.0981613	2.22519e-06	184	Genus_Paracoccus_Antecubitalfossa_Moist_PopGen || id:GCST90133166-2	2	TRUE	0.114936	23.6348
rs7914010	G	C	G	C	0.492084	-0.0150048	0.600543	0.617592	FALSE	TRUE	FALSE	10	88100671	0.145592	397665	0.917914	Generalized pustular psoriasis || id:finngen_R10_L12_PSORI_PUSTGEN	10	89860428	0.102809	3.50233e-06	184	Genus_Paracoccus_Antecubitalfossa_Moist_PopGen || id:GCST90133166-2	2	TRUE	0.110722	22.6604
rs9394726	G	A	G	A	-0.868284	0.373731	0.915761	0.895741	FALSE	FALSE	FALSE	6	40742640	0.2301	397665	0.10433	Generalized pustular psoriasis || id:finngen_R10_L12_PSORI_PUSTGEN	6	40710379	0.168678	6.80178e-07	184	Genus_Paracoccus_Antecubitalfossa_Moist_PopGen || id:GCST90133166-2	2	TRUE	0.125881	26.2096
rs10433290	G	A	G	A	-0.613774	0.244658	0.828804	0.770125	FALSE	FALSE	FALSE	22	17545891	0.168459	397665	0.146411	Generalized pustular psoriasis || id:finngen_R10_L12_PSORI_PUSTGEN	22	18025580	0.125404	2.16432e-06	184	Genus_Rothia_Antecubitalfossa_Moist_PopGen || id:GCST90133167-2	2	TRUE	0.115193	23.6946
rs11044406	G	A	G	A	-0.943457	-0.0251231	0.940217	0.909761	FALSE	FALSE	FALSE	12	19083553	0.245874	397665	0.918615	Generalized pustular psoriasis || id:finngen_R10_L12_PSORI_PUSTGEN	12	19236487	0.203148	6.52471e-06	184	Genus_Rothia_Antecubitalfossa_Moist_PopGen || id:GCST90133167-2	2	TRUE	0.104921	21.334
rs1563054	T	C	T	C	0.576221	0.108853	0.758152	0.763907	FALSE	FALSE	FALSE	11	44796080	0.16645	397665	0.513131	Generalized pustular psoriasis || id:finngen_R10_L12_PSORI_PUSTGEN	11	44817630	0.118736	2.6054e-06	184	Genus_Rothia_Antecubitalfossa_Moist_PopGen || id:GCST90133167-2	2	TRUE	0.113472	23.2953
rs8074279	C	T	C	T	0.468643	-0.00420805	0.619565	0.728819	FALSE	FALSE	FALSE	17	61717266	0.157987	397665	0.97875	Generalized pustular psoriasis || id:finngen_R10_L12_PSORI_PUSTGEN	17	59794627	0.100347	5.82728e-06	184	Genus_Rothia_Antecubitalfossa_Moist_PopGen || id:GCST90133167-2	2	TRUE	0.105977	21.5741
rs9820287	C	T	C	T	-0.558929	-0.0364192	0.798913	0.821155	FALSE	FALSE	FALSE	3	133165906	0.18451	397665	0.843527	Generalized pustular psoriasis || id:finngen_R10_L12_PSORI_PUSTGEN	3	132884750	0.11888	5.08253e-06	184	Genus_Rothia_Antecubitalfossa_Moist_PopGen || id:GCST90133167-2	2	TRUE	0.107253	21.8651
rs12440581	G	A	G	A	0.422764	0.00338784	0.53373	0.557164	FALSE	FALSE	FALSE	15	33656462	0.1422	397665	0.980993	Generalized pustular psoriasis || id:finngen_R10_L12_PSORI_PUSTGEN	15	33948663	0.087947	2.64622e-06	252	Genus_Staphylococcus_Forehead_Sebaceous_PopGen || id:GCST90133199-1	2	TRUE	0.0839947	22.9242
rs12622075	T	C	T	C	0.492211	-0.404477	0.77381	0.769391	FALSE	FALSE	FALSE	2	179259177	0.139336	397665	0.00369735	Generalized pustular psoriasis || id:finngen_R10_L12_PSORI_PUSTGEN	2	180123904	0.106381	5.96361e-06	252	Genus_Staphylococcus_Forehead_Sebaceous_PopGen || id:GCST90133199-1	2	TRUE	0.0783007	21.2381
rs2144125	G	A	G	A	0.7163	0.00374335	0.920635	0.878849	FALSE	FALSE	FALSE	20	8693359	0.21387	397665	0.986035	Generalized pustular psoriasis || id:finngen_R10_L12_PSORI_PUSTGEN	20	8674006	0.157623	8.58374e-06	252	Genus_Staphylococcus_Forehead_Sebaceous_PopGen || id:GCST90133199-1	2	TRUE	0.0757426	20.4874
rs2443768	A	C	A	C	-0.591699	-0.228801	0.871032	0.920989	FALSE	FALSE	FALSE	5	21701728	0.263146	397665	0.384585	Generalized pustular psoriasis || id:finngen_R10_L12_PSORI_PUSTGEN	5	21701837	0.128874	6.98169e-06	252	Genus_Staphylococcus_Forehead_Sebaceous_PopGen || id:GCST90133199-1	2	TRUE	0.077194	20.9129
rs2463117	T	C	T	C	0.56371	-0.189785	0.829365	0.831545	FALSE	FALSE	FALSE	14	61528955	0.189295	397665	0.31606	Generalized pustular psoriasis || id:finngen_R10_L12_PSORI_PUSTGEN	14	61995673	0.117997	3.03033e-06	252	Genus_Staphylococcus_Forehead_Sebaceous_PopGen || id:GCST90133199-1	2	TRUE	0.0830462	22.6419
rs2973139	T	C	T	C	-0.571799	0.101876	0.825397	0.791807	FALSE	FALSE	FALSE	5	153169261	0.172219	397665	0.554151	Generalized pustular psoriasis || id:finngen_R10_L12_PSORI_PUSTGEN	5	152548821	0.113586	9.19222e-07	252	Genus_Staphylococcus_Forehead_Sebaceous_PopGen || id:GCST90133199-1	2	TRUE	0.0913741	25.1407
rs4665554	C	T	C	T	-0.437931	-0.0828407	0.583333	0.492932	FALSE	FALSE	FALSE	2	23127619	0.14129	397665	0.557663	Generalized pustular psoriasis || id:finngen_R10_L12_PSORI_PUSTGEN	2	23350490	0.085642	6.29529e-07	252	Genus_Staphylococcus_Forehead_Sebaceous_PopGen || id:GCST90133199-1	2	TRUE	0.0940072	25.9404
rs9762321	T	G	T	G	0.465675	0.0156328	0.714286	0.666974	FALSE	FALSE	FALSE	4	179986596	0.150534	397665	0.917289	Generalized pustular psoriasis || id:finngen_R10_L12_PSORI_PUSTGEN	4	180907749	0.0974505	3.01329e-06	252	Genus_Staphylococcus_Forehead_Sebaceous_PopGen || id:GCST90133199-1	2	TRUE	0.0830856	22.6536
rs112162072	A	G	A	G	0.740482	-0.614505	0.943548	0.916851	FALSE	FALSE	FALSE	7	20601415	0.257357	397665	0.0169516	Generalized pustular psoriasis || id:finngen_R10_L12_PSORI_PUSTGEN	7	20641038	0.16096	6.16808e-06	310	Genus_Staphylococcus_Retroauricularfold_Sebaceous_KORAFF4 || id:GCST90133199-2	2	TRUE	0.0639073	21.0272
rs1283671	C	T	C	T	0.552612	-0.221713	0.873016	0.895316	FALSE	FALSE	FALSE	8	107421459	0.230652	397665	0.336429	Generalized pustular psoriasis || id:finngen_R10_L12_PSORI_PUSTGEN	8	108433687	0.116536	3.21998e-06	315	Genus_Staphylococcus_Retroauricularfold_Sebaceous_KORAFF4 || id:GCST90133199-2	2	TRUE	0.0666287	22.3435
rs142690890	C	T	C	T	0.765806	-0.255979	0.942857	0.927825	FALSE	FALSE	FALSE	13	23310276	0.273499	397665	0.349303	Generalized pustular psoriasis || id:finngen_R10_L12_PSORI_PUSTGEN	13	23884415	0.161926	3.41247e-06	315	Genus_Staphylococcus_Retroauricularfold_Sebaceous_KORAFF4 || id:GCST90133199-2	2	TRUE	0.066298	22.2247
rs2013210	A	G	A	G	-0.37162	-0.0550467	0.68254	0.698447	FALSE	FALSE	FALSE	18	59479263	0.153199	397665	0.71936	Generalized pustular psoriasis || id:finngen_R10_L12_PSORI_PUSTGEN	18	57146495	0.0823968	9.17334e-06	315	Genus_Staphylococcus_Retroauricularfold_Sebaceous_KORAFF4 || id:GCST90133199-2	2	TRUE	0.0606583	20.2121
rs4959153	A	G	A	G	-0.427495	0.19813	0.72293	0.80817	FALSE	FALSE	FALSE	6	1723371	0.179537	397665	0.269783	Generalized pustular psoriasis || id:finngen_R10_L12_PSORI_PUSTGEN	6	1723605	0.0894124	2.6903e-06	314	Genus_Staphylococcus_Retroauricularfold_Sebaceous_KORAFF4 || id:GCST90133199-2	2	TRUE	0.0678604	22.7138
rs61975175	A	G	A	G	0.653722	0.160121	0.914013	0.930897	FALSE	FALSE	FALSE	13	105829077	0.276521	397665	0.562551	Generalized pustular psoriasis || id:finngen_R10_L12_PSORI_PUSTGEN	13	106481426	0.140864	5.11659e-06	314	Genus_Staphylococcus_Retroauricularfold_Sebaceous_KORAFF4 || id:GCST90133199-2	2	TRUE	0.064187	21.3999
rs62138459	T	C	T	C	-0.497753	0.139179	0.832797	0.797161	FALSE	FALSE	FALSE	2	47357596	0.175758	397665	0.428431	Generalized pustular psoriasis || id:finngen_R10_L12_PSORI_PUSTGEN	2	47584735	0.101008	1.35796e-06	311	Genus_Staphylococcus_Retroauricularfold_Sebaceous_KORAFF4 || id:GCST90133199-2	2	TRUE	0.0724278	24.1277
rs62275583	C	T	C	T	-0.683464	0.0648515	0.916667	0.87416	FALSE	FALSE	FALSE	3	153201322	0.21176	397665	0.759415	Generalized pustular psoriasis || id:finngen_R10_L12_PSORI_PUSTGEN	3	152919111	0.147221	5.12913e-06	306	Genus_Staphylococcus_Retroauricularfold_Sebaceous_KORAFF4 || id:GCST90133199-2	2	TRUE	0.0657976	21.4113
rs73167292	C	T	C	T	0.786664	-0.0358174	0.92381	0.905193	FALSE	FALSE	FALSE	3	172371155	0.242179	397665	0.882425	Generalized pustular psoriasis || id:finngen_R10_L12_PSORI_PUSTGEN	3	172088945	0.147228	1.76192e-07	315	Genus_Staphylococcus_Retroauricularfold_Sebaceous_KORAFF4 || id:GCST90133199-2	2	TRUE	0.0831011	28.3681
rs74538992	A	G	A	G	0.682807	0.213704	0.928797	0.953933	FALSE	FALSE	FALSE	5	126027010	0.345118	397665	0.535772	Generalized pustular psoriasis || id:finngen_R10_L12_PSORI_PUSTGEN	5	125362703	0.149262	6.87874e-06	316	Genus_Staphylococcus_Retroauricularfold_Sebaceous_KORAFF4 || id:GCST90133199-2	2	TRUE	0.0621101	20.7941
rs74962111	G	A	G	A	-0.665159	-0.364918	0.920886	0.970105	FALSE	FALSE	FALSE	12	73601526	0.419744	397665	0.384638	Generalized pustular psoriasis || id:finngen_R10_L12_PSORI_PUSTGEN	12	73995306	0.139926	3.04726e-06	316	Genus_Staphylococcus_Retroauricularfold_Sebaceous_KORAFF4 || id:GCST90133199-2	2	TRUE	0.0667376	22.4542
rs10508687	T	C	T	C	0.949608	-0.474979	0.950397	0.946233	FALSE	FALSE	FALSE	10	25037008	0.309383	397665	0.124724	Generalized pustular psoriasis || id:finngen_R10_L12_PSORI_PUSTGEN	10	25325937	0.194377	1.84475e-06	252	Genus_Propionibacterium_Forehead_Sebaceous_PopGen || id:GCST90133201-1	2	TRUE	0.0865166	23.6777
rs10847912	G	T	G	T	-0.418054	0.324181	0.650794	0.621728	FALSE	FALSE	FALSE	12	129619009	0.145265	397665	0.0256383	Generalized pustular psoriasis || id:finngen_R10_L12_PSORI_PUSTGEN	12	130103554	0.0884505	3.81776e-06	252	Genus_Propionibacterium_Forehead_Sebaceous_PopGen || id:GCST90133201-1	2	TRUE	0.0814285	22.1617
rs1549112	C	T	C	T	-0.398624	-0.0632922	0.56746	0.676985	FALSE	FALSE	FALSE	3	175369175	0.151033	397665	0.67517	Generalized pustular psoriasis || id:finngen_R10_L12_PSORI_PUSTGEN	3	175086964	0.0848908	4.38405e-06	252	Genus_Propionibacterium_Forehead_Sebaceous_PopGen || id:GCST90133201-1	2	TRUE	0.0804591	21.8748
rs62086066	C	T	C	T	0.536485	0.201292	0.837302	0.872087	FALSE	FALSE	FALSE	18	9432178	0.212076	397665	0.342545	Generalized pustular psoriasis || id:finngen_R10_L12_PSORI_PUSTGEN	18	9432176	0.116144	6.17261e-06	252	Genus_Propionibacterium_Forehead_Sebaceous_PopGen || id:GCST90133201-1	2	TRUE	0.0780589	21.167
rs9849313	T	C	T	C	0.449495	-0.202093	0.686508	0.772808	FALSE	FALSE	FALSE	3	29788384	0.167751	397665	0.228313	Generalized pustular psoriasis || id:finngen_R10_L12_PSORI_PUSTGEN	3	29829875	0.0941435	3.06877e-06	252	Genus_Propionibacterium_Forehead_Sebaceous_PopGen || id:GCST90133201-1	2	TRUE	0.0829579	22.6156
rs1016631	C	G	C	G	0.503772	-0.233816	0.846645	0.828089	FALSE	TRUE	FALSE	21	21874511	0.186393	397665	0.209687	Generalized pustular psoriasis || id:finngen_R10_L12_PSORI_PUSTGEN	21	23246831	0.109138	5.73242e-06	313	Genus_Propionibacterium_Retroauricularfold_Sebaceous_KORAFF4 || id:GCST90133201-2	2	TRUE	0.0637337	21.1705
rs12155690	C	T	C	T	0.536922	0.259167	0.826667	0.827724	FALSE	FALSE	FALSE	8	107135804	0.186608	397665	0.164885	Generalized pustular psoriasis || id:finngen_R10_L12_PSORI_PUSTGEN	8	108148032	0.10558	6.4961e-07	300	Genus_Propionibacterium_Retroauricularfold_Sebaceous_KORAFF4 || id:GCST90133201-2	2	TRUE	0.0793638	25.6892
rs13006272	T	C	T	C	0.461005	0.0362576	0.824921	0.792368	FALSE	FALSE	FALSE	2	106207196	0.173231	397665	0.834213	Generalized pustular psoriasis || id:finngen_R10_L12_PSORI_PUSTGEN	2	106823652	0.0993556	5.11849e-06	317	Genus_Propionibacterium_Retroauricularfold_Sebaceous_KORAFF4 || id:GCST90133201-2	2	TRUE	0.063596	21.3933
rs13320213	C	T	C	T	0.536934	-0.00630758	0.835962	0.778586	FALSE	FALSE	FALSE	3	168161920	0.169419	397665	0.970301	Generalized pustular psoriasis || id:finngen_R10_L12_PSORI_PUSTGEN	3	167879708	0.108521	1.22439e-06	317	Genus_Propionibacterium_Retroauricularfold_Sebaceous_KORAFF4 || id:GCST90133201-2	2	TRUE	0.0716888	24.3259
rs141801863	C	T	C	T	0.700061	-0.13263	0.928571	0.955818	FALSE	FALSE	FALSE	11	134600669	0.344196	397665	0.69999	Generalized pustular psoriasis || id:finngen_R10_L12_PSORI_PUSTGEN	11	134470563	0.154847	8.8095e-06	308	Genus_Propionibacterium_Retroauricularfold_Sebaceous_KORAFF4 || id:GCST90133201-2	2	TRUE	0.0622319	20.3067
rs211830	A	G	A	G	0.392817	0.0527691	0.498423	0.546993	FALSE	FALSE	FALSE	20	39851808	0.141156	397665	0.708528	Generalized pustular psoriasis || id:finngen_R10_L12_PSORI_PUSTGEN	20	38480450	0.078895	1.05476e-06	317	Genus_Propionibacterium_Retroauricularfold_Sebaceous_KORAFF4 || id:GCST90133201-2	2	TRUE	0.0725306	24.6338
rs2277868	T	C	T	C	0.39607	-0.0836634	0.735016	0.746035	FALSE	FALSE	FALSE	20	17699899	0.162448	397665	0.606542	Generalized pustular psoriasis || id:finngen_R10_L12_PSORI_PUSTGEN	20	17680544	0.0837485	3.40501e-06	317	Genus_Propionibacterium_Retroauricularfold_Sebaceous_KORAFF4 || id:GCST90133201-2	2	TRUE	0.0659054	22.2249
rs2698569	C	T	C	T	0.793764	-0.507967	0.935127	0.927572	FALSE	FALSE	FALSE	11	18437833	0.274994	397665	0.0647187	Generalized pustular psoriasis || id:finngen_R10_L12_PSORI_PUSTGEN	11	18459380	0.153544	4.18332e-07	316	Genus_Propionibacterium_Retroauricularfold_Sebaceous_KORAFF4 || id:GCST90133201-2	2	TRUE	0.077978	26.5559
rs36117378	C	G	C	G	0.603202	0.298982	0.876271	0.917433	FALSE	TRUE	FALSE	8	72344361	0.259956	397665	0.250092	Generalized pustular psoriasis || id:finngen_R10_L12_PSORI_PUSTGEN	8	73256596	0.11835	6.20567e-07	295	Genus_Propionibacterium_Retroauricularfold_Sebaceous_KORAFF4 || id:GCST90133201-2	2	TRUE	0.0809314	25.801
rs73370168	A	G	A	G	0.777925	0.26256	0.940895	0.945676	FALSE	FALSE	FALSE	10	122100324	0.3142	397665	0.403353	Generalized pustular psoriasis || id:finngen_R10_L12_PSORI_PUSTGEN	10	123859839	0.16504	3.67834e-06	313	Genus_Propionibacterium_Retroauricularfold_Sebaceous_KORAFF4 || id:GCST90133201-2	2	TRUE	0.066278	22.0756
rs75590953	C	T	C	T	0.458714	0.241343	0.823052	0.838958	FALSE	FALSE	FALSE	16	79876212	0.191163	397665	0.206771	Generalized pustular psoriasis || id:finngen_R10_L12_PSORI_PUSTGEN	16	79910109	0.101095	8.18914e-06	308	Genus_Propionibacterium_Retroauricularfold_Sebaceous_KORAFF4 || id:GCST90133201-2	2	TRUE	0.0626577	20.4549
rs75666428	A	G	A	G	0.798376	-0.338388	0.9375	0.952588	FALSE	FALSE	FALSE	15	84012650	0.336703	397665	0.314895	Generalized pustular psoriasis || id:finngen_R10_L12_PSORI_PUSTGEN	15	84681402	0.153076	3.35742e-07	312	Genus_Propionibacterium_Retroauricularfold_Sebaceous_KORAFF4 || id:GCST90133201-2	2	TRUE	0.0801942	27.0277
rs7656419	G	T	G	T	0.521765	0.24926	0.8367	0.884081	FALSE	FALSE	FALSE	4	189777963	0.222725	397665	0.263081	Generalized pustular psoriasis || id:finngen_R10_L12_PSORI_PUSTGEN	4	190699117	0.109772	3.13426e-06	297	Genus_Propionibacterium_Retroauricularfold_Sebaceous_KORAFF4 || id:GCST90133201-2	2	TRUE	0.0706917	22.4404
rs79565510	A	T	A	T	0.892609	-0.665518	0.94127	0.978272	FALSE	TRUE	FALSE	12	67985845	0.492551	397665	0.176642	Generalized pustular psoriasis || id:finngen_R10_L12_PSORI_PUSTGEN	12	68379625	0.157842	3.51287e-08	315	Genus_Propionibacterium_Retroauricularfold_Sebaceous_KORAFF4 || id:GCST90133201-2	2	TRUE	0.0921664	31.7768
rs8039423	G	A	G	A	0.402059	-0.120596	0.749191	0.820932	FALSE	FALSE	FALSE	15	54158175	0.185644	397665	0.515945	Generalized pustular psoriasis || id:finngen_R10_L12_PSORI_PUSTGEN	15	54450372	0.0885389	8.05095e-06	309	Genus_Propionibacterium_Retroauricularfold_Sebaceous_KORAFF4 || id:GCST90133201-2	2	TRUE	0.0625599	20.4876
rs1417689	T	C	T	C	-0.429214	0.130208	0.696429	0.585292	FALSE	FALSE	FALSE	6	63126735	0.143227	397665	0.363297	Generalized pustular psoriasis || id:finngen_R10_L12_PSORI_PUSTGEN	6	63836640	0.0934016	6.85792e-06	252	Genus_Corynebacterium_Forehead_Sebaceous_PopGen || id:GCST90133202-1	2	TRUE	0.0773196	20.9497
rs1521825	A	G	A	G	-0.431833	0.0108042	0.613095	0.675635	FALSE	FALSE	FALSE	8	83172197	0.150612	397665	0.942812	Generalized pustular psoriasis || id:finngen_R10_L12_PSORI_PUSTGEN	8	84084432	0.0924111	4.8556e-06	252	Genus_Corynebacterium_Forehead_Sebaceous_PopGen || id:GCST90133202-1	2	TRUE	0.0797428	21.6632
rs7244378	G	A	G	A	0.571015	0.163862	0.80754	0.822515	FALSE	FALSE	FALSE	18	63435607	0.183782	397665	0.372603	Generalized pustular psoriasis || id:finngen_R10_L12_PSORI_PUSTGEN	18	61102840	0.109377	3.75178e-07	252	Genus_Corynebacterium_Forehead_Sebaceous_PopGen || id:GCST90133202-1	2	TRUE	0.0975991	27.0387
rs75742406	G	A	G	A	0.491584	0.082212	0.765873	0.722296	FALSE	FALSE	FALSE	11	17048818	0.157261	397665	0.601132	Generalized pustular psoriasis || id:finngen_R10_L12_PSORI_PUSTGEN	11	17070365	0.10171	2.34712e-06	252	Genus_Corynebacterium_Forehead_Sebaceous_PopGen || id:GCST90133202-1	2	TRUE	0.0848335	23.1743
rs78998127	T	A	T	A	0.675704	0.0478662	0.906746	0.941573	FALSE	TRUE	FALSE	3	101611289	0.303918	397665	0.874853	Generalized pustular psoriasis || id:finngen_R10_L12_PSORI_PUSTGEN	3	101330133	0.14813	7.95983e-06	252	Genus_Corynebacterium_Forehead_Sebaceous_PopGen || id:GCST90133202-1	2	TRUE	0.0762729	20.6427
rs9887771	C	G	C	G	-0.469644	-0.0161706	0.775794	0.717156	FALSE	TRUE	FALSE	1	99811188	0.15592	397665	0.917399	Generalized pustular psoriasis || id:finngen_R10_L12_PSORI_PUSTGEN	1	100276744	0.103663	9.12111e-06	252	Genus_Corynebacterium_Forehead_Sebaceous_PopGen || id:GCST90133202-1	2	TRUE	0.0753158	20.3626
rs13050263	G	C	G	C	-0.464315	0.0172884	0.743464	0.788994	FALSE	TRUE	FALSE	21	21292983	0.173024	397665	0.920409	Generalized pustular psoriasis || id:finngen_R10_L12_PSORI_PUSTGEN	21	22665303	0.0873719	2.07572e-07	306	Genus_Corynebacterium_Retroauricularfold_Sebaceous_KORAFF4 || id:GCST90133202-2	2	TRUE	0.0844933	28.0566
rs16960676	C	T	C	T	-0.655785	-0.00428423	0.91806	0.934942	FALSE	FALSE	FALSE	16	12786589	0.289376	397665	0.988188	Generalized pustular psoriasis || id:finngen_R10_L12_PSORI_PUSTGEN	16	12880446	0.143977	7.66352e-06	299	Genus_Corynebacterium_Retroauricularfold_Sebaceous_KORAFF4 || id:GCST90133202-2	2	TRUE	0.064883	20.6073
rs28807761	G	A	G	A	-0.704745	-0.0900127	0.92691	0.933221	FALSE	FALSE	FALSE	15	27396116	0.277489	397665	0.745648	Generalized pustular psoriasis || id:finngen_R10_L12_PSORI_PUSTGEN	15	27641262	0.148021	3.00445e-06	301	Genus_Corynebacterium_Retroauricularfold_Sebaceous_KORAFF4 || id:GCST90133202-2	2	TRUE	0.0700352	22.5176
rs11235232	A	G	A	G	0.658933	0.144972	0.793919	0.814697	FALSE	FALSE	FALSE	11	87615970	0.181418	397665	0.42423	Generalized pustular psoriasis || id:finngen_R10_L12_PSORI_PUSTGEN	11	87326862	0.1408	6.49034e-06	148	Genus_Haemophilus_Dorsalforearm_Dry_PopGen || id:GCST90133219-1	2	TRUE	0.128909	21.6058
rs112384482	C	G	C	G	1.06141	-0.220242	0.929054	0.890366	FALSE	TRUE	FALSE	2	24008950	0.22504	397665	0.327739	Generalized pustular psoriasis || id:finngen_R10_L12_PSORI_PUSTGEN	2	24231820	0.218566	3.0456e-06	148	Genus_Haemophilus_Dorsalforearm_Dry_PopGen || id:GCST90133219-1	2	TRUE	0.137444	23.2643
rs149893292	G	A	G	A	-0.881281	-0.353827	0.908784	0.859791	FALSE	FALSE	FALSE	4	186248205	0.205064	397665	0.0844462	Generalized pustular psoriasis || id:finngen_R10_L12_PSORI_PUSTGEN	4	187169359	0.1903	7.98076e-06	148	Genus_Haemophilus_Dorsalforearm_Dry_PopGen || id:GCST90133219-1	2	TRUE	0.126566	21.1564
rs17562195	T	C	T	C	-1.41257	-0.121915	0.959459	0.924717	FALSE	FALSE	FALSE	1	197459299	0.265184	397665	0.645706	Generalized pustular psoriasis || id:finngen_R10_L12_PSORI_PUSTGEN	1	197428429	0.277507	1.08496e-06	148	Genus_Haemophilus_Dorsalforearm_Dry_PopGen || id:GCST90133219-1	2	TRUE	0.148987	25.5603
rs2268390	C	T	C	T	0.642972	-0.174003	0.780405	0.771855	FALSE	FALSE	FALSE	12	109197472	0.167635	397665	0.299275	Generalized pustular psoriasis || id:finngen_R10_L12_PSORI_PUSTGEN	12	109635277	0.130334	2.17566e-06	148	Genus_Haemophilus_Dorsalforearm_Dry_PopGen || id:GCST90133219-1	2	TRUE	0.141218	24.0083
rs4705804	C	T	C	T	-0.57201	-0.0892057	0.72973	0.698719	FALSE	FALSE	FALSE	5	113223073	0.153973	397665	0.562348	Generalized pustular psoriasis || id:finngen_R10_L12_PSORI_PUSTGEN	5	112558770	0.124001	8.6098e-06	148	Genus_Haemophilus_Dorsalforearm_Dry_PopGen || id:GCST90133219-1	2	TRUE	0.125706	20.9918
rs6456465	A	G	A	G	0.831478	0.0605397	0.875	0.850811	FALSE	FALSE	FALSE	6	22026688	0.199862	397665	0.76196	Generalized pustular psoriasis || id:finngen_R10_L12_PSORI_PUSTGEN	6	22026917	0.176909	5.95987e-06	148	Genus_Haemophilus_Dorsalforearm_Dry_PopGen || id:GCST90133219-1	2	TRUE	0.129873	21.7917
rs6765913	A	G	A	G	-0.637569	0.157996	0.831081	0.847539	FALSE	FALSE	FALSE	3	194473367	0.197384	397665	0.423449	Generalized pustular psoriasis || id:finngen_R10_L12_PSORI_PUSTGEN	3	194194096	0.139221	9.903e-06	148	Genus_Haemophilus_Dorsalforearm_Dry_PopGen || id:GCST90133219-1	2	TRUE	0.124117	20.6889
rs7751	T	C	T	C	0.558338	0.208416	0.658784	0.711885	FALSE	FALSE	FALSE	22	17628665	0.156883	397665	0.18402	Generalized pustular psoriasis || id:finngen_R10_L12_PSORI_PUSTGEN	22	18111431	0.120454	7.83786e-06	148	Genus_Haemophilus_Dorsalforearm_Dry_PopGen || id:GCST90133219-1	2	TRUE	0.126771	21.1956
rs10423922	T	A	T	A	-0.93297	0.223482	0.915493	0.925921	FALSE	TRUE	FALSE	19	52500286	0.268049	397665	0.404428	Generalized pustular psoriasis || id:finngen_R10_L12_PSORI_PUSTGEN	19	53003539	0.198939	6.42897e-06	142	Genus_Haemophilus_Volarforearm_Dry_PopGen || id:GCST90133219-2	2	TRUE	0.134112	21.6838
rs10484051	C	A	C	A	1.12672	0.0965494	0.933099	0.893916	FALSE	FALSE	FALSE	14	95502745	0.22701	397665	0.670612	Generalized pustular psoriasis || id:finngen_R10_L12_PSORI_PUSTGEN	14	95969082	0.228015	2.18143e-06	142	Genus_Haemophilus_Volarforearm_Dry_PopGen || id:GCST90133219-2	2	TRUE	0.146725	24.0737
rs11209635	T	G	T	G	-1.00371	0.00285699	0.901408	0.905694	FALSE	FALSE	FALSE	1	70548777	0.241795	397665	0.990573	Generalized pustular psoriasis || id:finngen_R10_L12_PSORI_PUSTGEN	1	71014460	0.183999	2.15748e-07	142	Genus_Haemophilus_Volarforearm_Dry_PopGen || id:GCST90133219-2	2	TRUE	0.173249	29.3375
rs1123295	A	G	A	G	-0.504469	-0.0508611	0.552817	0.561956	FALSE	FALSE	FALSE	1	33444852	0.142475	397665	0.721106	Generalized pustular psoriasis || id:finngen_R10_L12_PSORI_PUSTGEN	1	33910453	0.108949	8.25323e-06	142	Genus_Haemophilus_Volarforearm_Dry_PopGen || id:GCST90133219-2	2	TRUE	0.131178	21.1378
rs11611443	C	A	C	A	-0.987741	0.26707	0.919014	0.939637	FALSE	FALSE	FALSE	12	1501858	0.294117	397665	0.363857	Generalized pustular psoriasis || id:finngen_R10_L12_PSORI_PUSTGEN	12	1611024	0.212524	7.67441e-06	142	Genus_Haemophilus_Volarforearm_Dry_PopGen || id:GCST90133219-2	2	TRUE	0.132033	21.2965
rs11894899	G	T	G	T	-0.797766	0.0181682	0.883803	0.845802	FALSE	FALSE	FALSE	2	1017608	0.194419	397665	0.925547	Generalized pustular psoriasis || id:finngen_R10_L12_PSORI_PUSTGEN	2	1013294	0.160009	1.79655e-06	142	Genus_Haemophilus_Volarforearm_Dry_PopGen || id:GCST90133219-2	2	TRUE	0.148975	24.5076
rs1204632	T	G	T	G	0.895515	-0.118297	0.887324	0.92212	FALSE	FALSE	FALSE	20	22421780	0.266387	397665	0.656986	Generalized pustular psoriasis || id:finngen_R10_L12_PSORI_PUSTGEN	20	22402418	0.186574	4.02585e-06	142	Genus_Haemophilus_Volarforearm_Dry_PopGen || id:GCST90133219-2	2	TRUE	0.139591	22.7133
rs12143770	T	C	T	C	0.531059	-0.0236379	0.637324	0.615822	FALSE	FALSE	FALSE	1	18397443	0.145154	397665	0.870639	Generalized pustular psoriasis || id:finngen_R10_L12_PSORI_PUSTGEN	1	18723937	0.114651	8.1963e-06	142	Genus_Haemophilus_Volarforearm_Dry_PopGen || id:GCST90133219-2	2	TRUE	0.13126	21.1529
rs1917949	T	C	T	C	-0.614193	0.278816	0.75	0.78883	FALSE	FALSE	FALSE	2	234640696	0.173544	397665	0.108142	Generalized pustular psoriasis || id:finngen_R10_L12_PSORI_PUSTGEN	2	235549340	0.132689	8.30488e-06	142	Genus_Haemophilus_Volarforearm_Dry_PopGen || id:GCST90133219-2	2	TRUE	0.131105	21.1242
rs202559	G	A	G	A	0.660291	0.0231168	0.799296	0.766443	FALSE	FALSE	FALSE	20	1781638	0.1673	397665	0.890102	Generalized pustular psoriasis || id:finngen_R10_L12_PSORI_PUSTGEN	20	1762284	0.144027	9.99201e-06	142	Genus_Haemophilus_Volarforearm_Dry_PopGen || id:GCST90133219-2	2	TRUE	0.128928	20.7215
rs2076075	G	A	G	A	0.748718	-0.479973	0.862676	0.880146	FALSE	FALSE	FALSE	1	186854152	0.21862	397665	0.02813	Generalized pustular psoriasis || id:finngen_R10_L12_PSORI_PUSTGEN	1	186823284	0.159068	5.97884e-06	142	Genus_Haemophilus_Volarforearm_Dry_PopGen || id:GCST90133219-2	2	TRUE	0.134964	21.8429
rs2496546	C	A	C	A	0.517021	-0.126817	0.619718	0.632238	FALSE	FALSE	FALSE	6	72124065	0.146671	397665	0.387241	Generalized pustular psoriasis || id:finngen_R10_L12_PSORI_PUSTGEN	6	72833768	0.111692	8.29957e-06	142	Genus_Haemophilus_Volarforearm_Dry_PopGen || id:GCST90133219-2	2	TRUE	0.131113	21.1256
rs4072355	G	C	G	C	-0.793808	-0.128968	0.820423	0.780955	FALSE	TRUE	FALSE	8	12737789	0.170248	397665	0.448734	Generalized pustular psoriasis || id:finngen_R10_L12_PSORI_PUSTGEN	8	12595298	0.146549	2.57588e-07	142	Genus_Haemophilus_Volarforearm_Dry_PopGen || id:GCST90133219-2	2	TRUE	0.17124	28.9271
rs4836877	A	C	A	C	-0.745611	-0.399888	0.823944	0.85169	FALSE	FALSE	FALSE	9	116843886	0.198078	397665	0.0435031	Generalized pustular psoriasis || id:finngen_R10_L12_PSORI_PUSTGEN	9	119606165	0.149003	1.65808e-06	142	Genus_Haemophilus_Volarforearm_Dry_PopGen || id:GCST90133219-2	2	TRUE	0.149904	24.6873
rs61882555	T	G	T	G	-0.668978	-0.0878295	0.785211	0.796159	FALSE	FALSE	FALSE	11	79408195	0.174178	397665	0.614084	Generalized pustular psoriasis || id:finngen_R10_L12_PSORI_PUSTGEN	11	79119239	0.138694	3.63755e-06	142	Genus_Haemophilus_Volarforearm_Dry_PopGen || id:GCST90133219-2	2	TRUE	0.140775	22.9375
rs7984030	T	C	T	C	-0.924438	-0.133596	0.911972	0.904613	FALSE	FALSE	FALSE	13	44056284	0.23698	397665	0.572928	Generalized pustular psoriasis || id:finngen_R10_L12_PSORI_PUSTGEN	13	44630420	0.186407	2.0178e-06	142	Genus_Haemophilus_Volarforearm_Dry_PopGen || id:GCST90133219-2	2	TRUE	0.147629	24.2478
rs111289765	C	T	C	T	0.408139	-0.308848	0.662162	0.668457	FALSE	FALSE	FALSE	2	20402874	0.130956	397665	0.0183535	Generalized pustular psoriasis || id:finngen_R10_L12_PSORI_PUSTGEN	2	20602635	0.0849177	2.61815e-06	259	Genus_Staphylococcus_Dorsalforearm_Dry_PopGen || id:GCST90133223-1	2	TRUE	0.0818872	22.922
rs11206972	G	A	G	A	0.578449	0.105148	0.841699	0.77783	FALSE	FALSE	FALSE	1	57100826	0.169827	397665	0.535816	Generalized pustular psoriasis || id:finngen_R10_L12_PSORI_PUSTGEN	1	57566499	0.118411	1.82007e-06	259	Genus_Staphylococcus_Dorsalforearm_Dry_PopGen || id:GCST90133223-1	2	TRUE	0.0843657	23.6798
rs12206344	C	G	C	G	0.75434	0.301877	0.920849	0.909431	FALSE	TRUE	FALSE	6	22245576	0.249072	397665	0.225509	Generalized pustular psoriasis || id:finngen_R10_L12_PSORI_PUSTGEN	6	22245805	0.159695	3.81533e-06	259	Genus_Staphylococcus_Dorsalforearm_Dry_PopGen || id:GCST90133223-1	2	TRUE	0.0793164	22.1404
rs12270027	G	A	G	A	0.477759	-0.0331017	0.754826	0.822051	FALSE	FALSE	FALSE	11	129693528	0.185479	397665	0.858357	Generalized pustular psoriasis || id:finngen_R10_L12_PSORI_PUSTGEN	11	129563423	0.105144	8.50568e-06	259	Genus_Staphylococcus_Dorsalforearm_Dry_PopGen || id:GCST90133223-1	2	TRUE	0.0738306	20.487
rs12572683	A	G	A	G	-0.450042	-0.0514464	0.754826	0.690493	FALSE	FALSE	FALSE	10	7610458	0.152701	397665	0.736185	Generalized pustular psoriasis || id:finngen_R10_L12_PSORI_PUSTGEN	10	7652421	0.0972715	5.89688e-06	259	Genus_Staphylococcus_Dorsalforearm_Dry_PopGen || id:GCST90133223-1	2	TRUE	0.0763391	21.2406
rs34323080	C	T	C	T	0.402286	-0.257725	0.683398	0.634701	FALSE	FALSE	FALSE	4	61844375	0.145701	397665	0.0769166	Generalized pustular psoriasis || id:finngen_R10_L12_PSORI_PUSTGEN	4	62710093	0.089077	9.60258e-06	259	Genus_Staphylococcus_Dorsalforearm_Dry_PopGen || id:GCST90133223-1	2	TRUE	0.0729993	20.2382
rs35541683	A	G	A	G	0.709757	0.102124	0.916988	0.930976	FALSE	FALSE	FALSE	18	51667348	0.279714	397665	0.715035	Generalized pustular psoriasis || id:finngen_R10_L12_PSORI_PUSTGEN	18	49193718	0.157376	9.86679e-06	259	Genus_Staphylococcus_Dorsalforearm_Dry_PopGen || id:GCST90133223-1	2	TRUE	0.0728132	20.1825
rs66498356	G	C	G	C	0.444924	-0.0636706	0.675676	0.695958	FALSE	TRUE	FALSE	4	75935911	0.153316	397665	0.67793	Generalized pustular psoriasis || id:finngen_R10_L12_PSORI_PUSTGEN	4	76857064	0.0941521	3.78165e-06	259	Genus_Staphylococcus_Dorsalforearm_Dry_PopGen || id:GCST90133223-1	2	TRUE	0.0793769	22.1588
rs72695710	T	C	T	C	0.83742	0.428333	0.940154	0.888382	FALSE	FALSE	FALSE	4	165906118	0.223497	397665	0.0553006	Generalized pustular psoriasis || id:finngen_R10_L12_PSORI_PUSTGEN	4	166827270	0.172081	1.98451e-06	259	Genus_Staphylococcus_Dorsalforearm_Dry_PopGen || id:GCST90133223-1	2	TRUE	0.0837765	23.4992
rs9592538	T	G	T	G	0.425857	0.0852654	0.557915	0.536837	FALSE	FALSE	FALSE	13	67940392	0.141534	397665	0.546882	Generalized pustular psoriasis || id:finngen_R10_L12_PSORI_PUSTGEN	13	68514524	0.0812362	3.31292e-07	259	Genus_Staphylococcus_Dorsalforearm_Dry_PopGen || id:GCST90133223-1	2	TRUE	0.0959251	27.2685
rs1539567	G	A	G	A	0.514454	-0.436882	0.793173	0.873687	FALSE	FALSE	FALSE	9	127479887	0.170752	397665	0.0105102	Generalized pustular psoriasis || id:finngen_R10_L12_PSORI_PUSTGEN	9	130242166	0.110171	4.95738e-06	249	Genus_Staphylococcus_Volarforearm_Dry_PopGen || id:GCST90133223-2	2	TRUE	0.0805191	21.6298
rs1885482	T	A	T	A	0.596615	-0.110277	0.831325	0.791875	FALSE	TRUE	FALSE	14	70013498	0.173002	397665	0.523845	Generalized pustular psoriasis || id:finngen_R10_L12_PSORI_PUSTGEN	14	70480215	0.12004	1.25158e-06	249	Genus_Staphylococcus_Volarforearm_Dry_PopGen || id:GCST90133223-2	2	TRUE	0.0902516	24.5036
rs2560691	G	A	G	A	-0.523757	0.10091	0.716867	0.75956	FALSE	FALSE	FALSE	5	116018886	0.163848	397665	0.537979	Generalized pustular psoriasis || id:finngen_R10_L12_PSORI_PUSTGEN	5	115354583	0.0974374	1.76891e-07	249	Genus_Staphylococcus_Volarforearm_Dry_PopGen || id:GCST90133223-2	2	TRUE	0.103975	28.6619
rs2832084	A	G	A	G	0.518166	-0.00707781	0.797189	0.784437	FALSE	FALSE	FALSE	21	28782476	0.171657	397665	0.967111	Generalized pustular psoriasis || id:finngen_R10_L12_PSORI_PUSTGEN	21	30154798	0.113675	8.11652e-06	249	Genus_Staphylococcus_Volarforearm_Dry_PopGen || id:GCST90133223-2	2	TRUE	0.0770193	20.6112
rs2856330	T	C	T	C	0.653799	-0.401733	0.889558	0.884612	FALSE	FALSE	FALSE	12	11789843	0.227575	397665	0.0775175	Generalized pustular psoriasis || id:finngen_R10_L12_PSORI_PUSTGEN	12	11942777	0.14074	5.52142e-06	249	Genus_Staphylococcus_Volarforearm_Dry_PopGen || id:GCST90133223-2	2	TRUE	0.0797547	21.4067
rs11579228	C	T	C	T	-0.514029	-0.0634101	0.820463	0.840705	FALSE	FALSE	FALSE	1	211378536	0.193602	397665	0.743269	Generalized pustular psoriasis || id:finngen_R10_L12_PSORI_PUSTGEN	1	211551878	0.112661	7.83167e-06	259	Genus_Corynebacterium_Dorsalforearm_Dry_PopGen || id:GCST90133224-1	2	TRUE	0.0743963	20.6566
rs1234358	C	T	C	T	-0.41987	0.393079	0.664093	0.770253	FALSE	FALSE	FALSE	7	150683943	0.168299	397665	0.0195124	Generalized pustular psoriasis || id:finngen_R10_L12_PSORI_PUSTGEN	7	150381031	0.0899336	4.88744e-06	259	Genus_Corynebacterium_Dorsalforearm_Dry_PopGen || id:GCST90133224-1	2	TRUE	0.0776236	21.6281
rs12436788	G	A	G	A	-0.635006	0.0552561	0.889961	0.88414	FALSE	FALSE	FALSE	14	48309571	0.222291	397665	0.80369	Generalized pustular psoriasis || id:finngen_R10_L12_PSORI_PUSTGEN	14	48778774	0.130295	1.9197e-06	259	Genus_Corynebacterium_Dorsalforearm_Dry_PopGen || id:GCST90133224-1	2	TRUE	0.0840027	23.5685
rs13362349	A	G	A	G	-0.514554	0.140658	0.77027	0.67487	FALSE	FALSE	FALSE	5	71737765	0.15136	397665	0.352739	Generalized pustular psoriasis || id:finngen_R10_L12_PSORI_PUSTGEN	5	71033592	0.106007	2.10214e-06	259	Genus_Corynebacterium_Dorsalforearm_Dry_PopGen || id:GCST90133224-1	2	TRUE	0.083384	23.3791
rs149821435	G	A	G	A	-0.564657	-0.0332082	0.837838	0.84682	FALSE	FALSE	FALSE	8	102511288	0.194878	397665	0.864691	Generalized pustular psoriasis || id:finngen_R10_L12_PSORI_PUSTGEN	8	103523516	0.115964	1.95897e-06	259	Genus_Corynebacterium_Dorsalforearm_Dry_PopGen || id:GCST90133224-1	2	TRUE	0.0838647	23.5263
rs17375837	A	G	A	G	-0.874612	-0.359299	0.942085	0.955233	FALSE	FALSE	FALSE	3	123946165	0.343536	397665	0.295615	Generalized pustular psoriasis || id:finngen_R10_L12_PSORI_PUSTGEN	3	123665012	0.187344	4.89161e-06	259	Genus_Corynebacterium_Dorsalforearm_Dry_PopGen || id:GCST90133224-1	2	TRUE	0.0776178	21.6264
rs17617684	G	T	G	T	-0.415187	0.111512	0.604247	0.589506	FALSE	FALSE	FALSE	17	14230033	0.142767	397665	0.434757	Generalized pustular psoriasis || id:finngen_R10_L12_PSORI_PUSTGEN	17	14133350	0.0893321	5.36888e-06	259	Genus_Corynebacterium_Dorsalforearm_Dry_PopGen || id:GCST90133224-1	2	TRUE	0.076981	21.4341
rs6774189	A	G	A	G	0.767721	0.0246255	0.928571	0.937842	FALSE	FALSE	FALSE	3	46551040	0.297146	397665	0.933952	Generalized pustular psoriasis || id:finngen_R10_L12_PSORI_PUSTGEN	3	46592530	0.161197	3.19639e-06	259	Genus_Corynebacterium_Dorsalforearm_Dry_PopGen || id:GCST90133224-1	2	TRUE	0.0805253	22.5074
rs7028802	C	T	C	T	0.630452	0.228989	0.888031	0.920567	FALSE	FALSE	FALSE	9	390228	0.258831	397665	0.376316	Generalized pustular psoriasis || id:finngen_R10_L12_PSORI_PUSTGEN	9	390228	0.135098	4.932e-06	259	Genus_Corynebacterium_Dorsalforearm_Dry_PopGen || id:GCST90133224-1	2	TRUE	0.0775615	21.6094
rs72826444	C	T	C	T	0.83598	-0.0430667	0.938224	0.92374	FALSE	FALSE	FALSE	17	51123012	0.263781	397665	0.870308	Generalized pustular psoriasis || id:finngen_R10_L12_PSORI_PUSTGEN	17	49200373	0.182455	7.19424e-06	259	Genus_Corynebacterium_Dorsalforearm_Dry_PopGen || id:GCST90133224-1	2	TRUE	0.0749777	20.8312
rs1100150	A	G	A	G	0.649269	0.013848	0.888	0.843713	FALSE	FALSE	FALSE	7	12398078	0.19527	397665	0.943464	Generalized pustular psoriasis || id:finngen_R10_L12_PSORI_PUSTGEN	7	12437704	0.139833	5.56727e-06	250	Genus_Corynebacterium_Volarforearm_Dry_PopGen || id:GCST90133224-2	2	TRUE	0.0793895	21.3864
rs11059855	C	T	C	T	-0.420798	0.103551	0.694	0.732391	FALSE	FALSE	FALSE	12	128725565	0.159405	397665	0.515946	Generalized pustular psoriasis || id:finngen_R10_L12_PSORI_PUSTGEN	12	129210110	0.0931672	9.72498e-06	250	Genus_Corynebacterium_Volarforearm_Dry_PopGen || id:GCST90133224-2	2	TRUE	0.0754423	20.2364
rs12873717	G	A	G	A	0.511774	-0.0395086	0.76	0.713551	FALSE	FALSE	FALSE	13	110569482	0.156619	397665	0.800841	Generalized pustular psoriasis || id:finngen_R10_L12_PSORI_PUSTGEN	13	111221829	0.104374	1.70575e-06	250	Genus_Corynebacterium_Volarforearm_Dry_PopGen || id:GCST90133224-2	2	TRUE	0.0877306	23.8495
rs340202	A	C	A	C	0.505236	-0.111036	0.72	0.676249	FALSE	FALSE	FALSE	4	85432643	0.150783	397665	0.461491	Generalized pustular psoriasis || id:finngen_R10_L12_PSORI_PUSTGEN	4	86353796	0.102393	1.4764e-06	250	Genus_Corynebacterium_Volarforearm_Dry_PopGen || id:GCST90133224-2	2	TRUE	0.0887457	24.1524
rs3847320	G	A	G	A	0.448337	0.0148676	0.73	0.690585	FALSE	FALSE	FALSE	9	134041630	0.151997	397665	0.922079	Generalized pustular psoriasis || id:finngen_R10_L12_PSORI_PUSTGEN	9	136906752	0.0962566	5.2172e-06	250	Genus_Corynebacterium_Volarforearm_Dry_PopGen || id:GCST90133224-2	2	TRUE	0.0798485	21.5208
rs57778164	T	C	T	C	-0.507266	0.0792309	0.732	0.723278	FALSE	FALSE	FALSE	16	56643722	0.157652	397665	0.615268	Generalized pustular psoriasis || id:finngen_R10_L12_PSORI_PUSTGEN	16	56677634	0.0972078	3.81465e-07	250	Genus_Corynebacterium_Volarforearm_Dry_PopGen || id:GCST90133224-2	2	TRUE	0.0982262	27.0135
rs6731937	T	C	T	C	-0.389835	0.080449	0.574	0.550669	FALSE	FALSE	FALSE	2	120426644	0.141398	397665	0.569386	Generalized pustular psoriasis || id:finngen_R10_L12_PSORI_PUSTGEN	2	121184220	0.0847002	6.66759e-06	250	Genus_Corynebacterium_Volarforearm_Dry_PopGen || id:GCST90133224-2	2	TRUE	0.0781141	21.0138
rs7238445	G	A	G	A	0.504547	-0.135116	0.794	0.738159	FALSE	FALSE	FALSE	18	52255174	0.160698	397665	0.400455	Generalized pustular psoriasis || id:finngen_R10_L12_PSORI_PUSTGEN	18	49781544	0.110212	7.43129e-06	250	Genus_Corynebacterium_Volarforearm_Dry_PopGen || id:GCST90133224-2	2	TRUE	0.0773469	20.7901
rs73227985	G	A	G	A	-0.696605	-0.0275601	0.9	0.853651	FALSE	FALSE	FALSE	13	75818397	0.201322	397665	0.891113	Generalized pustular psoriasis || id:finngen_R10_L12_PSORI_PUSTGEN	13	76392533	0.152506	7.77409e-06	250	Genus_Corynebacterium_Volarforearm_Dry_PopGen || id:GCST90133224-2	2	TRUE	0.0770277	20.6971
rs8076452	C	T	C	T	-0.540331	0.0460983	0.832	0.831906	FALSE	FALSE	FALSE	17	17596340	0.187384	397665	0.805674	Generalized pustular psoriasis || id:finngen_R10_L12_PSORI_PUSTGEN	17	17499654	0.118981	8.72875e-06	250	Genus_Corynebacterium_Volarforearm_Dry_PopGen || id:GCST90133224-2	2	TRUE	0.0762077	20.4586
rs876400	C	T	C	T	-0.501821	0.025768	0.682	0.740519	FALSE	FALSE	FALSE	9	78219983	0.161443	397665	0.873188	Generalized pustular psoriasis || id:finngen_R10_L12_PSORI_PUSTGEN	9	80834899	0.0912914	9.58792e-08	250	Genus_Corynebacterium_Volarforearm_Dry_PopGen || id:GCST90133224-2	2	TRUE	0.107831	29.9743
rs10846578	C	T	C	T	0.522194	-0.0241322	0.666667	0.654089	FALSE	FALSE	FALSE	12	123915731	0.14871	397665	0.871088	Generalized pustular psoriasis || id:finngen_R10_L12_PSORI_PUSTGEN	12	124400278	0.111864	6.23645e-06	168	Genus_Bacteroides_Dorsalforearm_Dry_PopGen || id:GCST90133229-1	2	TRUE	0.114818	21.5321
rs112990712	T	C	T	C	-0.816386	-0.157955	0.907738	0.888452	FALSE	FALSE	FALSE	1	163089055	0.222501	397665	0.477761	Generalized pustular psoriasis || id:finngen_R10_L12_PSORI_PUSTGEN	1	163058845	0.171774	4.32578e-06	168	Genus_Bacteroides_Dorsalforearm_Dry_PopGen || id:GCST90133229-1	2	TRUE	0.118518	22.3191
rs1891661	A	G	A	G	0.541614	0.109678	0.633929	0.629847	FALSE	FALSE	FALSE	1	210812668	0.14587	397665	0.45212	Generalized pustular psoriasis || id:finngen_R10_L12_PSORI_PUSTGEN	1	210986010	0.10985	1.97543e-06	168	Genus_Bacteroides_Dorsalforearm_Dry_PopGen || id:GCST90133229-1	2	TRUE	0.126408	24.0201
rs34885890	G	A	G	A	-0.974744	0.331316	0.925595	0.910399	FALSE	FALSE	FALSE	4	2387668	0.244202	397665	0.174867	Generalized pustular psoriasis || id:finngen_R10_L12_PSORI_PUSTGEN	4	2389395	0.190885	8.92166e-07	168	Genus_Bacteroides_Dorsalforearm_Dry_PopGen || id:GCST90133229-1	2	TRUE	0.134359	25.7654
rs4492732	A	G	A	G	-1.08325	-0.00294108	0.943452	0.939987	FALSE	FALSE	FALSE	10	120613346	0.296727	397665	0.992092	Generalized pustular psoriasis || id:finngen_R10_L12_PSORI_PUSTGEN	10	122372858	0.226221	3.7001e-06	168	Genus_Bacteroides_Dorsalforearm_Dry_PopGen || id:GCST90133229-1	2	TRUE	0.120094	22.6566
rs55702239	G	A	G	A	-0.599683	0.283853	0.75	0.736891	FALSE	FALSE	FALSE	4	54191582	0.159978	397665	0.0760099	Generalized pustular psoriasis || id:finngen_R10_L12_PSORI_PUSTGEN	4	55057749	0.103672	3.53155e-08	168	Genus_Bacteroides_Dorsalforearm_Dry_PopGen || id:GCST90133229-1	2	TRUE	0.166085	33.061
rs567637	A	G	A	G	-0.50942	0.120852	0.598214	0.570292	FALSE	FALSE	FALSE	16	84500760	0.14207	397665	0.394964	Generalized pustular psoriasis || id:finngen_R10_L12_PSORI_PUSTGEN	16	84534366	0.10774	4.81074e-06	168	Genus_Bacteroides_Dorsalforearm_Dry_PopGen || id:GCST90133229-1	2	TRUE	0.117444	22.0901
rs62043393	G	T	G	T	-1.02423	0.392127	0.940476	0.976278	FALSE	FALSE	FALSE	16	87004603	0.463266	397665	0.397307	Generalized pustular psoriasis || id:finngen_R10_L12_PSORI_PUSTGEN	16	87038209	0.222231	8.03886e-06	168	Genus_Bacteroides_Dorsalforearm_Dry_PopGen || id:GCST90133229-1	2	TRUE	0.112244	20.9884
rs6951622	C	G	C	G	-0.55053	0.237311	0.723214	0.676104	FALSE	TRUE	FALSE	7	148429882	0.150828	397665	0.115629	Generalized pustular psoriasis || id:finngen_R10_L12_PSORI_PUSTGEN	7	148126974	0.116732	5.06879e-06	168	Genus_Bacteroides_Dorsalforearm_Dry_PopGen || id:GCST90133229-1	2	TRUE	0.116916	21.9775
rs73231219	T	C	T	C	0.735643	-0.0311497	0.857143	0.943352	FALSE	FALSE	FALSE	3	140470530	0.302527	397665	0.917991	Generalized pustular psoriasis || id:finngen_R10_L12_PSORI_PUSTGEN	3	140189372	0.133959	1.47038e-07	168	Genus_Bacteroides_Dorsalforearm_Dry_PopGen || id:GCST90133229-1	2	TRUE	0.152188	29.7982
rs10786219	G	T	G	T	0.476433	-0.0334362	0.607735	0.674263	FALSE	FALSE	FALSE	10	95543030	0.151216	397665	0.825003	Generalized pustular psoriasis || id:finngen_R10_L12_PSORI_PUSTGEN	10	97302787	0.103438	7.769e-06	181	Genus_Bacteroides_Volarforearm_Dry_PopGen || id:GCST90133229-2	2	TRUE	0.104914	20.9808
rs112758501	C	T	C	T	0.734544	0.22223	0.900552	0.942121	FALSE	FALSE	FALSE	2	52244531	0.308384	397665	0.471139	Generalized pustular psoriasis || id:finngen_R10_L12_PSORI_PUSTGEN	2	52471669	0.159241	7.54554e-06	181	Genus_Bacteroides_Volarforearm_Dry_PopGen || id:GCST90133229-2	2	TRUE	0.105191	21.0427
rs112882319	C	T	C	T	-0.885855	-0.330377	0.917127	0.890524	FALSE	FALSE	FALSE	2	49198190	0.224253	397665	0.140689	Generalized pustular psoriasis || id:finngen_R10_L12_PSORI_PUSTGEN	2	49425329	0.179412	1.80422e-06	181	Genus_Bacteroides_Volarforearm_Dry_PopGen || id:GCST90133229-2	2	TRUE	0.118704	24.11
rs11701158	G	A	G	A	-0.559623	-0.129785	0.734807	0.698331	FALSE	FALSE	FALSE	21	42941303	0.154021	397665	0.399426	Generalized pustular psoriasis || id:finngen_R10_L12_PSORI_PUSTGEN	21	44361413	0.108516	6.604e-07	181	Genus_Bacteroides_Volarforearm_Dry_PopGen || id:GCST90133229-2	2	TRUE	0.128111	26.3014
rs1391569	A	T	A	T	-0.526073	-0.271639	0.767956	0.725271	FALSE	TRUE	FALSE	15	37708332	0.158258	397665	0.0860835	Generalized pustular psoriasis || id:finngen_R10_L12_PSORI_PUSTGEN	15	38000533	0.113031	6.31076e-06	181	Genus_Bacteroides_Volarforearm_Dry_PopGen || id:GCST90133229-2	2	TRUE	0.106886	21.4224
rs1429955	T	C	T	C	-0.476523	0.00663268	0.588398	0.630791	FALSE	FALSE	FALSE	8	40504108	0.145803	397665	0.963716	Generalized pustular psoriasis || id:finngen_R10_L12_PSORI_PUSTGEN	8	40361627	0.0996016	3.57471e-06	181	Genus_Bacteroides_Volarforearm_Dry_PopGen || id:GCST90133229-2	2	TRUE	0.112264	22.6365
rs145438026	C	T	C	T	-0.918342	-0.0772138	0.928177	0.967247	FALSE	FALSE	FALSE	2	156371743	0.399266	397665	0.846654	Generalized pustular psoriasis || id:finngen_R10_L12_PSORI_PUSTGEN	2	157228255	0.199208	7.63777e-06	181	Genus_Bacteroides_Volarforearm_Dry_PopGen || id:GCST90133229-2	2	TRUE	0.105076	21.017
rs17004734	A	G	A	G	-0.705987	-0.173946	0.853591	0.858856	FALSE	FALSE	FALSE	21	45101543	0.20462	397665	0.395275	Generalized pustular psoriasis || id:finngen_R10_L12_PSORI_PUSTGEN	21	46521458	0.141241	1.36932e-06	181	Genus_Bacteroides_Volarforearm_Dry_PopGen || id:GCST90133229-2	2	TRUE	0.121293	24.7084
rs1883628	C	T	C	T	-0.795622	-0.0189218	0.906077	0.929518	FALSE	FALSE	FALSE	6	1058079	0.278751	397665	0.945881	Generalized pustular psoriasis || id:finngen_R10_L12_PSORI_PUSTGEN	6	1058314	0.172751	7.7823e-06	181	Genus_Bacteroides_Volarforearm_Dry_PopGen || id:GCST90133229-2	2	TRUE	0.104898	20.9772
rs283819	C	A	C	A	-0.543768	0.376502	0.790055	0.813201	FALSE	FALSE	FALSE	2	79000117	0.180992	397665	0.0375059	Generalized pustular psoriasis || id:finngen_R10_L12_PSORI_PUSTGEN	2	79227243	0.115347	4.86238e-06	181	Genus_Bacteroides_Volarforearm_Dry_PopGen || id:GCST90133229-2	2	TRUE	0.109356	21.9781
rs342701	C	T	C	T	-0.56591	0.0395611	0.790055	0.783274	FALSE	FALSE	FALSE	13	91773603	0.171629	397665	0.8177	Generalized pustular psoriasis || id:finngen_R10_L12_PSORI_PUSTGEN	13	92425857	0.121083	5.79905e-06	181	Genus_Bacteroides_Volarforearm_Dry_PopGen || id:GCST90133229-2	2	TRUE	0.107688	21.6024
rs34435660	C	T	C	T	-0.662063	-0.114587	0.859116	0.832242	FALSE	FALSE	FALSE	21	20340720	0.189545	397665	0.545486	Generalized pustular psoriasis || id:finngen_R10_L12_PSORI_PUSTGEN	21	21713032	0.140355	4.80174e-06	181	Genus_Bacteroides_Volarforearm_Dry_PopGen || id:GCST90133229-2	2	TRUE	0.109475	22.0049
rs75565556	A	G	A	G	1.09046	0.225371	0.950276	0.980503	FALSE	FALSE	FALSE	18	69156817	0.514378	397665	0.661284	Generalized pustular psoriasis || id:finngen_R10_L12_PSORI_PUSTGEN	18	66824054	0.233101	5.69093e-06	181	Genus_Bacteroides_Volarforearm_Dry_PopGen || id:GCST90133229-2	2	TRUE	0.107866	21.6425
rs78751417	C	T	C	T	0.768527	0.391071	0.89779	0.928385	FALSE	FALSE	FALSE	6	43836565	0.275416	397665	0.155629	Generalized pustular psoriasis || id:finngen_R10_L12_PSORI_PUSTGEN	6	43804302	0.167761	8.64489e-06	181	Genus_Bacteroides_Volarforearm_Dry_PopGen || id:GCST90133229-2	2	TRUE	0.1039	20.7544
rs8077283	T	C	T	C	-0.678809	-0.296161	0.848066	0.857016	FALSE	FALSE	FALSE	17	10059955	0.19992	397665	0.138501	Generalized pustular psoriasis || id:finngen_R10_L12_PSORI_PUSTGEN	17	9963272	0.144225	5.02655e-06	181	Genus_Bacteroides_Volarforearm_Dry_PopGen || id:GCST90133229-2	2	TRUE	0.109042	21.9072
rs10860026	G	A	G	A	0.745665	0.34816	0.875723	0.873374	FALSE	FALSE	FALSE	12	96369471	0.211224	397665	0.099291	Generalized pustular psoriasis || id:finngen_R10_L12_PSORI_PUSTGEN	12	96763249	0.155184	3.36808e-06	173	Genus_Anaerococcus_Dorsalforearm_Dry_PopGen || id:GCST90133230-1	2	TRUE	0.117744	22.8214
rs10937638	T	C	T	C	-0.650538	-0.0109263	0.82948	0.798669	FALSE	FALSE	FALSE	4	5375515	0.175487	397665	0.950354	Generalized pustular psoriasis || id:finngen_R10_L12_PSORI_PUSTGEN	4	5377242	0.13674	4.14916e-06	173	Genus_Anaerococcus_Dorsalforearm_Dry_PopGen || id:GCST90133230-1	2	TRUE	0.115694	22.372
rs114158060	A	G	A	G	0.84523	-0.616761	0.904624	0.941231	FALSE	FALSE	FALSE	6	89551396	0.298383	397665	0.0387329	Generalized pustular psoriasis || id:finngen_R10_L12_PSORI_PUSTGEN	6	90261115	0.181628	6.51113e-06	173	Genus_Anaerococcus_Dorsalforearm_Dry_PopGen || id:GCST90133230-1	2	TRUE	0.111254	21.4059
rs11818509	C	T	C	T	-0.76904	-0.386215	0.884393	0.91953	FALSE	FALSE	FALSE	10	2837817	0.25944	397665	0.136581	Generalized pustular psoriasis || id:finngen_R10_L12_PSORI_PUSTGEN	10	2880009	0.16385	5.47967e-06	173	Genus_Anaerococcus_Dorsalforearm_Dry_PopGen || id:GCST90133230-1	2	TRUE	0.112955	21.7749
rs12956696	C	G	C	G	-1.08454	-0.250496	0.942197	0.943568	FALSE	TRUE	FALSE	18	39054262	0.305715	397665	0.41257	Generalized pustular psoriasis || id:finngen_R10_L12_PSORI_PUSTGEN	18	36634226	0.221892	2.33583e-06	173	Genus_Anaerococcus_Dorsalforearm_Dry_PopGen || id:GCST90133230-1	2	TRUE	0.121334	23.6133
rs1403026	A	G	A	G	-0.740491	-0.0221943	0.869942	0.923284	FALSE	FALSE	FALSE	3	149826153	0.264445	397665	0.933114	Generalized pustular psoriasis || id:finngen_R10_L12_PSORI_PUSTGEN	3	149543940	0.1485	1.49988e-06	173	Genus_Anaerococcus_Dorsalforearm_Dry_PopGen || id:GCST90133230-1	2	TRUE	0.125666	24.5774
rs16875319	T	G	T	G	-0.792044	0.0560325	0.872832	0.831979	FALSE	FALSE	FALSE	5	5319294	0.191324	397665	0.769625	Generalized pustular psoriasis || id:finngen_R10_L12_PSORI_PUSTGEN	5	5319407	0.15263	5.92758e-07	173	Genus_Anaerococcus_Dorsalforearm_Dry_PopGen || id:GCST90133230-1	2	TRUE	0.134692	26.6176
rs1908208	A	C	A	C	-0.494847	-0.133447	0.635838	0.556193	FALSE	FALSE	FALSE	16	19881414	0.141828	397665	0.34675	Generalized pustular psoriasis || id:finngen_R10_L12_PSORI_PUSTGEN	16	19892736	0.107648	8.30397e-06	173	Genus_Anaerococcus_Dorsalforearm_Dry_PopGen || id:GCST90133230-1	2	TRUE	0.108851	20.8871
rs2358910	G	T	G	T	-0.457761	-0.0235615	0.523121	0.479752	FALSE	FALSE	FALSE	4	148753595	0.141335	397665	0.867601	Generalized pustular psoriasis || id:finngen_R10_L12_PSORI_PUSTGEN	4	149674747	0.100504	9.93864e-06	173	Genus_Anaerococcus_Dorsalforearm_Dry_PopGen || id:GCST90133230-1	2	TRUE	0.107073	20.505
rs4318543	A	T	A	T	0.50086	-0.187379	0.699422	0.715505	FALSE	TRUE	FALSE	3	4912971	0.15683	397665	0.232168	Generalized pustular psoriasis || id:finngen_R10_L12_PSORI_PUSTGEN	3	4954656	0.108087	7.08846e-06	173	Genus_Anaerococcus_Dorsalforearm_Dry_PopGen || id:GCST90133230-1	2	TRUE	0.110415	21.2244
rs4997807	C	T	C	T	0.455842	-0.19621	0.578035	0.58779	FALSE	FALSE	FALSE	7	156365978	0.143144	397665	0.170462	Generalized pustular psoriasis || id:finngen_R10_L12_PSORI_PUSTGEN	7	156158672	0.098578	7.38901e-06	173	Genus_Anaerococcus_Dorsalforearm_Dry_PopGen || id:GCST90133230-1	2	TRUE	0.110005	21.1358
rs56214776	G	A	G	A	-0.688283	0.134083	0.869942	0.898954	FALSE	FALSE	FALSE	16	78011892	0.233748	397665	0.566224	Generalized pustular psoriasis || id:finngen_R10_L12_PSORI_PUSTGEN	16	78045789	0.149962	8.56161e-06	173	Genus_Anaerococcus_Dorsalforearm_Dry_PopGen || id:GCST90133230-1	2	TRUE	0.108549	20.822
rs6474615	T	C	T	C	-0.472202	0.196046	0.65896	0.64554	FALSE	FALSE	FALSE	9	11024277	0.147181	397665	0.182858	Generalized pustular psoriasis || id:finngen_R10_L12_PSORI_PUSTGEN	9	11024277	0.102863	8.52949e-06	173	Genus_Anaerococcus_Dorsalforearm_Dry_PopGen || id:GCST90133230-1	2	TRUE	0.108586	20.83
rs6586815	G	C	G	C	-0.751455	0.235411	0.852601	0.853706	FALSE	TRUE	FALSE	8	16424002	0.196677	397665	0.231329	Generalized pustular psoriasis || id:finngen_R10_L12_PSORI_PUSTGEN	8	16281511	0.151133	1.59994e-06	173	Genus_Anaerococcus_Dorsalforearm_Dry_PopGen || id:GCST90133230-1	2	TRUE	0.125035	24.4364
rs73888313	C	T	C	T	-0.873208	0.0868883	0.924855	0.925202	FALSE	FALSE	FALSE	22	42453192	0.266764	397665	0.744643	Generalized pustular psoriasis || id:finngen_R10_L12_PSORI_PUSTGEN	22	42849198	0.191672	9.89277e-06	173	Genus_Anaerococcus_Dorsalforearm_Dry_PopGen || id:GCST90133230-1	2	TRUE	0.107119	20.5148
rs7908505	A	G	A	G	0.448603	-0.008446	0.638728	0.562043	FALSE	FALSE	FALSE	10	82921307	0.141899	397665	0.952537	Generalized pustular psoriasis || id:finngen_R10_L12_PSORI_PUSTGEN	10	84681063	0.0976333	8.3792e-06	173	Genus_Anaerococcus_Dorsalforearm_Dry_PopGen || id:GCST90133230-1	2	TRUE	0.108762	20.8678
rs838553	G	C	G	C	-0.489965	-0.245704	0.644509	0.630916	FALSE	TRUE	FALSE	2	233513464	0.145717	397665	0.0917635	Generalized pustular psoriasis || id:finngen_R10_L12_PSORI_PUSTGEN	2	234422110	0.103765	4.84651e-06	173	Genus_Anaerococcus_Dorsalforearm_Dry_PopGen || id:GCST90133230-1	2	TRUE	0.114165	22.0382
rs9370504	A	G	A	G	-0.501065	0.0257356	0.67052	0.667667	FALSE	FALSE	FALSE	6	56285233	0.150071	397665	0.863839	Generalized pustular psoriasis || id:finngen_R10_L12_PSORI_PUSTGEN	6	56150031	0.106969	5.70591e-06	173	Genus_Anaerococcus_Dorsalforearm_Dry_PopGen || id:GCST90133230-1	2	TRUE	0.112556	21.6882
rs9484795	T	C	T	C	-0.741571	0.037554	0.783237	0.793778	FALSE	FALSE	FALSE	6	143700903	0.174536	397665	0.829639	Generalized pustular psoriasis || id:finngen_R10_L12_PSORI_PUSTGEN	6	144022040	0.128234	3.41412e-08	173	Genus_Anaerococcus_Dorsalforearm_Dry_PopGen || id:GCST90133230-1	2	TRUE	0.161994	33.0558
rs1965662	C	T	C	T	0.534579	0.0403698	0.751397	0.669123	FALSE	FALSE	FALSE	18	54818849	0.150494	397665	0.788508	Generalized pustular psoriasis || id:finngen_R10_L12_PSORI_PUSTGEN	18	52486080	0.117279	9.59475e-06	179	Genus_Anaerococcus_Volarforearm_Dry_PopGen || id:GCST90133230-2	2	TRUE	0.104001	20.5449
rs2500288	C	T	C	T	-0.475425	0.154306	0.530726	0.612194	FALSE	FALSE	FALSE	1	3297538	0.144203	397665	0.284592	Generalized pustular psoriasis || id:finngen_R10_L12_PSORI_PUSTGEN	1	3214102	0.0974756	2.3835e-06	179	Genus_Anaerococcus_Volarforearm_Dry_PopGen || id:GCST90133230-2	2	TRUE	0.117308	23.523
rs6516034	G	A	G	A	0.481893	0.000879824	0.539106	0.496488	FALSE	FALSE	FALSE	20	5433900	0.142046	397665	0.995058	Generalized pustular psoriasis || id:finngen_R10_L12_PSORI_PUSTGEN	20	5414546	0.104823	8.12105e-06	179	Genus_Anaerococcus_Volarforearm_Dry_PopGen || id:GCST90133230-2	2	TRUE	0.105601	20.8983
rs7307114	C	A	C	A	-0.599659	-0.128673	0.804469	0.792549	FALSE	FALSE	FALSE	12	26701016	0.173717	397665	0.458872	Generalized pustular psoriasis || id:finngen_R10_L12_PSORI_PUSTGEN	12	26853949	0.124667	3.21459e-06	179	Genus_Anaerococcus_Volarforearm_Dry_PopGen || id:GCST90133230-2	2	TRUE	0.114461	22.8783
rs9310238	T	C	T	C	-0.444738	0.115275	0.5	0.488925	FALSE	FALSE	FALSE	3	72259375	0.141237	397665	0.414398	Generalized pustular psoriasis || id:finngen_R10_L12_PSORI_PUSTGEN	3	72308526	0.0950618	5.72279e-06	179	Genus_Anaerococcus_Volarforearm_Dry_PopGen || id:GCST90133230-2	2	TRUE	0.108954	21.643
rs11055251	A	C	A	C	0.54369	-0.237572	0.753061	0.629497	FALSE	FALSE	FALSE	12	13138092	0.145782	397665	0.103178	Generalized pustular psoriasis || id:finngen_R10_L12_PSORI_PUSTGEN	12	13291026	0.10589	5.80034e-07	245	Genus_Enhydrobacter_Dorsalforearm_Dry_PopGen || id:GCST90133231-1	2	TRUE	0.0971498	26.1477
rs112065281	T	C	T	C	-0.506991	-0.224572	0.834694	0.816772	FALSE	FALSE	FALSE	18	51646911	0.181631	397665	0.216302	Generalized pustular psoriasis || id:finngen_R10_L12_PSORI_PUSTGEN	18	49173281	0.108922	5.33992e-06	245	Genus_Enhydrobacter_Dorsalforearm_Dry_PopGen || id:GCST90133231-1	2	TRUE	0.0812467	21.4888
rs11791149	T	C	T	C	-0.510922	-0.0201229	0.816327	0.83862	FALSE	FALSE	FALSE	9	130629522	0.192248	397665	0.916636	Generalized pustular psoriasis || id:finngen_R10_L12_PSORI_PUSTGEN	9	133504909	0.111485	7.33733e-06	245	Genus_Enhydrobacter_Dorsalforearm_Dry_PopGen || id:GCST90133231-1	2	TRUE	0.0789573	20.8314
rs434474	T	A	T	A	-0.454843	-0.185145	0.689796	0.696185	FALSE	TRUE	FALSE	1	4754057	0.152806	397665	0.225651	Generalized pustular psoriasis || id:finngen_R10_L12_PSORI_PUSTGEN	1	4814117	0.0920145	1.43327e-06	245	Genus_Enhydrobacter_Dorsalforearm_Dry_PopGen || id:GCST90133231-1	2	TRUE	0.0906894	24.2354
rs434474	T	A	T	A	-0.454843	-0.185145	0.689796	0.696185	FALSE	TRUE	FALSE	1	4754057	0.152806	397665	0.225651	Generalized pustular psoriasis || id:finngen_R10_L12_PSORI_PUSTGEN	1	4814117	0.0920145	1.43327e-06	245	Genus_Enhydrobacter_Dorsalforearm_Dry_PopGen || id:GCST90133231-1	2	TRUE	0.0906894	24.2354
rs55806473	A	T	A	T	-0.430967	0.12844	0.691837	0.653648	FALSE	TRUE	FALSE	16	5409039	0.148113	397665	0.385844	Generalized pustular psoriasis || id:finngen_R10_L12_PSORI_PUSTGEN	16	5459040	0.0847501	7.342e-07	245	Genus_Enhydrobacter_Dorsalforearm_Dry_PopGen || id:GCST90133231-1	2	TRUE	0.0954695	25.6476
rs62257654	T	C	T	C	-0.561559	0.0149933	0.814286	0.818757	FALSE	FALSE	FALSE	3	4043892	0.182004	397665	0.934346	Generalized pustular psoriasis || id:finngen_R10_L12_PSORI_PUSTGEN	3	4085576	0.108625	4.89642e-07	245	Genus_Enhydrobacter_Dorsalforearm_Dry_PopGen || id:GCST90133231-1	2	TRUE	0.0983564	26.5078
rs12117900	C	G	C	G	-0.678651	0.0880137	0.896996	0.83581	FALSE	TRUE	FALSE	1	210432546	0.189108	397665	0.641635	Generalized pustular psoriasis || id:finngen_R10_L12_PSORI_PUSTGEN	1	210605890	0.142493	3.37395e-06	233	Genus_Enhydrobacter_Volarforearm_Dry_PopGen || id:GCST90133231-2	2	TRUE	0.0887168	22.4887
rs12586414	G	T	G	T	-0.517588	0.0307801	0.798283	0.735463	FALSE	FALSE	FALSE	14	100837902	0.158766	397665	0.846277	Generalized pustular psoriasis || id:finngen_R10_L12_PSORI_PUSTGEN	14	101304239	0.105467	1.74193e-06	233	Genus_Enhydrobacter_Volarforearm_Dry_PopGen || id:GCST90133231-2	2	TRUE	0.0936821	23.8775
rs12965141	G	C	G	C	-0.472953	-0.0249151	0.770386	0.74495	FALSE	TRUE	FALSE	18	43815744	0.160823	397665	0.876882	Generalized pustular psoriasis || id:finngen_R10_L12_PSORI_PUSTGEN	18	41395709	0.103732	8.32246e-06	233	Genus_Enhydrobacter_Volarforearm_Dry_PopGen || id:GCST90133231-2	2	TRUE	0.0819102	20.6094
rs1334751	T	C	T	C	0.595221	-0.121728	0.839056	0.670896	FALSE	FALSE	FALSE	10	28728644	0.150602	397665	0.418931	Generalized pustular psoriasis || id:finngen_R10_L12_PSORI_PUSTGEN	10	29017573	0.128047	5.62399e-06	233	Genus_Enhydrobacter_Volarforearm_Dry_PopGen || id:GCST90133231-2	2	TRUE	0.0848682	21.4227
rs1401283	G	A	G	A	-0.381361	-0.217663	0.630901	0.683944	FALSE	FALSE	FALSE	2	170278536	0.154789	397665	0.159668	Generalized pustular psoriasis || id:finngen_R10_L12_PSORI_PUSTGEN	2	171135046	0.0829281	7.00509e-06	233	Genus_Enhydrobacter_Volarforearm_Dry_PopGen || id:GCST90133231-2	2	TRUE	0.0832114	20.9665
rs141500492	T	C	T	C	0.81967	-0.385421	0.929185	0.933572	FALSE	FALSE	FALSE	2	38430056	0.284985	397665	0.176238	Generalized pustular psoriasis || id:finngen_R10_L12_PSORI_PUSTGEN	2	38657198	0.178369	7.10865e-06	233	Genus_Enhydrobacter_Volarforearm_Dry_PopGen || id:GCST90133231-2	2	TRUE	0.0831007	20.9361
rs1425130	A	C	A	C	0.418714	-0.184798	0.560086	0.628287	FALSE	FALSE	FALSE	7	37519127	0.146733	397665	0.207879	Generalized pustular psoriasis || id:finngen_R10_L12_PSORI_PUSTGEN	7	37558730	0.0910778	7.04765e-06	233	Genus_Enhydrobacter_Volarforearm_Dry_PopGen || id:GCST90133231-2	2	TRUE	0.0831657	20.9539
rs1491121	T	A	T	A	-0.503535	0.174466	0.783262	0.762737	FALSE	TRUE	FALSE	9	106753141	0.167158	397665	0.296615	Generalized pustular psoriasis || id:finngen_R10_L12_PSORI_PUSTGEN	9	109515422	0.111068	9.3123e-06	233	Genus_Enhydrobacter_Volarforearm_Dry_PopGen || id:GCST90133231-2	2	TRUE	0.0810612	20.3769
rs6496260	A	C	A	C	-0.41171	0.089323	0.56867	0.540324	FALSE	FALSE	FALSE	15	97838255	0.141067	397665	0.526606	Generalized pustular psoriasis || id:finngen_R10_L12_PSORI_PUSTGEN	15	98381485	0.0849929	2.33184e-06	233	Genus_Enhydrobacter_Volarforearm_Dry_PopGen || id:GCST90133231-2	2	TRUE	0.0914935	23.2635
rs9828670	G	A	G	A	-0.425327	-0.0813589	0.579399	0.646777	FALSE	FALSE	FALSE	3	66666385	0.148397	397665	0.583519	Generalized pustular psoriasis || id:finngen_R10_L12_PSORI_PUSTGEN	3	66716809	0.0856588	1.33254e-06	233	Genus_Enhydrobacter_Volarforearm_Dry_PopGen || id:GCST90133231-2	2	TRUE	0.0956896	24.4433
rs111743743	C	A	C	A	-0.855623	0.323796	0.929612	0.936917	FALSE	FALSE	FALSE	3	43818836	0.286774	397665	0.258858	Generalized pustular psoriasis || id:finngen_R10_L12_PSORI_PUSTGEN	3	43860328	0.18766	8.83546e-06	206	Genus_Micrococcus_Dorsalforearm_Dry_PopGen || id:GCST90133232-1	2	TRUE	0.0916643	20.5866
rs11764256	A	G	A	G	-0.413861	-0.0399284	0.558252	0.503358	FALSE	FALSE	FALSE	7	37701701	0.140761	397665	0.776671	Generalized pustular psoriasis || id:finngen_R10_L12_PSORI_PUSTGEN	7	37741303	0.0904426	8.22596e-06	206	Genus_Micrococcus_Dorsalforearm_Dry_PopGen || id:GCST90133232-1	2	TRUE	0.0922685	20.7361
rs140949500	G	A	G	A	-0.882304	0.306025	0.93932	0.943116	FALSE	FALSE	FALSE	3	101728461	0.307105	397665	0.319015	Generalized pustular psoriasis || id:finngen_R10_L12_PSORI_PUSTGEN	3	101447305	0.191127	6.90255e-06	206	Genus_Micrococcus_Dorsalforearm_Dry_PopGen || id:GCST90133232-1	2	TRUE	0.0937503	21.1035
rs17084026	C	T	C	T	-0.647219	0.412647	0.856796	0.896113	FALSE	FALSE	FALSE	13	64271111	0.23356	397665	0.0772663	Generalized pustular psoriasis || id:finngen_R10_L12_PSORI_PUSTGEN	13	64845243	0.123214	3.75534e-07	206	Genus_Micrococcus_Dorsalforearm_Dry_PopGen || id:GCST90133232-1	2	TRUE	0.11812	27.3241
rs2664121	T	G	T	G	-0.629771	-0.0624829	0.75	0.701637	FALSE	FALSE	FALSE	3	9122413	0.154789	397665	0.686458	Generalized pustular psoriasis || id:finngen_R10_L12_PSORI_PUSTGEN	3	9164097	0.102627	4.31981e-09	206	Genus_Micrococcus_Dorsalforearm_Dry_PopGen || id:GCST90133232-1	2	TRUE	0.154549	37.2913
rs77505408	G	A	G	A	-0.982032	0.0629587	0.949029	0.8934	FALSE	FALSE	FALSE	3	55564566	0.232607	397665	0.786647	Generalized pustular psoriasis || id:finngen_R10_L12_PSORI_PUSTGEN	3	55598594	0.215739	9.12528e-06	206	Genus_Micrococcus_Dorsalforearm_Dry_PopGen || id:GCST90133232-1	2	TRUE	0.0913914	20.5191
rs10142830	G	A	G	A	0.525342	0.0468883	0.704082	0.650872	FALSE	FALSE	FALSE	14	96251460	0.147483	397665	0.750544	Generalized pustular psoriasis || id:finngen_R10_L12_PSORI_PUSTGEN	14	96717797	0.108894	2.836e-06	196	Genus_Micrococcus_Volarforearm_Dry_PopGen || id:GCST90133232-2	2	TRUE	0.106141	23.0366
rs12477082	T	C	T	C	-0.616321	-0.0772723	0.857143	0.831429	FALSE	FALSE	FALSE	2	55146800	0.1885	397665	0.681855	Generalized pustular psoriasis || id:finngen_R10_L12_PSORI_PUSTGEN	2	55373936	0.129516	3.80045e-06	196	Genus_Micrococcus_Volarforearm_Dry_PopGen || id:GCST90133232-2	2	TRUE	0.103568	22.4135
rs142188220	C	T	C	T	-0.860869	0.000961627	0.936224	0.94656	FALSE	FALSE	FALSE	3	14915698	0.309711	397665	0.997523	Generalized pustular psoriasis || id:finngen_R10_L12_PSORI_PUSTGEN	3	14957205	0.184171	5.51067e-06	196	Genus_Micrococcus_Volarforearm_Dry_PopGen || id:GCST90133232-2	2	TRUE	0.100294	21.6261
rs3782447	A	C	A	C	-0.480893	0.160629	0.632653	0.680156	FALSE	FALSE	FALSE	12	113875211	0.151689	397665	0.28963	Generalized pustular psoriasis || id:finngen_R10_L12_PSORI_PUSTGEN	12	114313016	0.0980137	1.95953e-06	196	Genus_Micrococcus_Volarforearm_Dry_PopGen || id:GCST90133232-2	2	TRUE	0.109385	23.827
rs4768565	T	C	T	C	-1.07744	0.0270908	0.951531	0.873746	FALSE	FALSE	FALSE	12	39099256	0.21266	397665	0.898632	Generalized pustular psoriasis || id:finngen_R10_L12_PSORI_PUSTGEN	12	39493058	0.225361	3.44189e-06	196	Genus_Micrococcus_Volarforearm_Dry_PopGen || id:GCST90133232-2	2	TRUE	0.10444	22.6242
rs6871719	A	G	A	G	-0.652051	0.29886	0.854592	0.836556	FALSE	FALSE	FALSE	5	3872730	0.192752	397665	0.121024	Generalized pustular psoriasis || id:finngen_R10_L12_PSORI_PUSTGEN	5	3872844	0.133882	2.30641e-06	196	Genus_Micrococcus_Volarforearm_Dry_PopGen || id:GCST90133232-2	2	TRUE	0.107956	23.478
rs7848343	C	T	C	T	-0.991752	0.0778301	0.941327	0.90595	FALSE	FALSE	FALSE	9	16510626	0.238287	397665	0.743954	Generalized pustular psoriasis || id:finngen_R10_L12_PSORI_PUSTGEN	9	16510624	0.207153	3.34242e-06	196	Genus_Micrococcus_Volarforearm_Dry_PopGen || id:GCST90133232-2	2	TRUE	0.104698	22.6866
rs8048962	T	C	T	C	0.433879	-0.0521428	0.487245	0.464486	FALSE	FALSE	FALSE	16	83052913	0.141452	397665	0.712407	Generalized pustular psoriasis || id:finngen_R10_L12_PSORI_PUSTGEN	16	83086518	0.0932003	5.98664e-06	196	Genus_Micrococcus_Volarforearm_Dry_PopGen || id:GCST90133232-2	2	TRUE	0.0995634	21.451
rs944413	A	C	A	C	0.446211	-0.112487	0.548469	0.448938	FALSE	FALSE	FALSE	21	34022442	0.142011	397665	0.428301	Generalized pustular psoriasis || id:finngen_R10_L12_PSORI_PUSTGEN	21	35394743	0.0937939	3.822e-06	196	Genus_Micrococcus_Volarforearm_Dry_PopGen || id:GCST90133232-2	2	TRUE	0.103518	22.4015
rs10999373	G	A	G	A	-0.81079	0.137534	0.916309	0.838818	FALSE	FALSE	FALSE	10	70525731	0.190948	397665	0.47136	Generalized pustular psoriasis || id:finngen_R10_L12_PSORI_PUSTGEN	10	72285487	0.167429	2.34734e-06	233	Genus_Streptococcus_Dorsalforearm_Dry_PopGen || id:GCST90133234-1	2	TRUE	0.0914438	23.2495
rs11263700	G	A	G	A	-0.426762	-0.241258	0.633047	0.62854	FALSE	FALSE	FALSE	15	27044869	0.146265	397665	0.0990535	Generalized pustular psoriasis || id:finngen_R10_L12_PSORI_PUSTGEN	15	27290016	0.0933565	7.89898e-06	233	Genus_Streptococcus_Dorsalforearm_Dry_PopGen || id:GCST90133234-1	2	TRUE	0.0823047	20.7175
rs1468231	C	T	C	T	-0.424383	-0.0461958	0.648069	0.733623	FALSE	FALSE	FALSE	4	104571665	0.159594	397665	0.772231	Generalized pustular psoriasis || id:finngen_R10_L12_PSORI_PUSTGEN	4	105492822	0.0910433	5.3117e-06	233	Genus_Streptococcus_Dorsalforearm_Dry_PopGen || id:GCST90133234-1	2	TRUE	0.085299	21.5415
rs2183307	C	T	C	T	0.616703	-0.103858	0.875536	0.90924	FALSE	FALSE	FALSE	20	857617	0.245006	397665	0.671638	Generalized pustular psoriasis || id:finngen_R10_L12_PSORI_PUSTGEN	20	838260	0.136324	9.71646e-06	233	Genus_Streptococcus_Dorsalforearm_Dry_PopGen || id:GCST90133234-1	2	TRUE	0.08074	20.2891
rs2977806	T	C	T	C	-0.431465	0.0234041	0.523605	0.490693	FALSE	FALSE	FALSE	8	6835446	0.141611	397665	0.868731	Generalized pustular psoriasis || id:finngen_R10_L12_PSORI_PUSTGEN	8	6692968	0.0866973	1.26413e-06	233	Genus_Streptococcus_Dorsalforearm_Dry_PopGen || id:GCST90133234-1	2	TRUE	0.0960842	24.5548
rs55985964	A	G	A	G	-0.685423	-0.143587	0.89485	0.91385	FALSE	FALSE	FALSE	8	32298837	0.251105	397665	0.567444	Generalized pustular psoriasis || id:finngen_R10_L12_PSORI_PUSTGEN	8	32156353	0.150349	8.34046e-06	233	Genus_Streptococcus_Dorsalforearm_Dry_PopGen || id:GCST90133234-1	2	TRUE	0.0818939	20.6049
rs56865570	C	T	C	T	-0.682057	0.287542	0.888412	0.911044	FALSE	FALSE	FALSE	5	1654566	0.246374	397665	0.243171	Generalized pustular psoriasis || id:finngen_R10_L12_PSORI_PUSTGEN	5	1654681	0.143428	3.48711e-06	233	Genus_Streptococcus_Dorsalforearm_Dry_PopGen || id:GCST90133234-1	2	TRUE	0.0884686	22.4197
rs60368176	T	C	T	C	-0.419083	-0.273797	0.665236	0.615005	FALSE	FALSE	FALSE	3	8206173	0.144649	397665	0.0583795	Generalized pustular psoriasis || id:finngen_R10_L12_PSORI_PUSTGEN	3	8247860	0.0898314	5.22091e-06	233	Genus_Streptococcus_Dorsalforearm_Dry_PopGen || id:GCST90133234-1	2	TRUE	0.0854289	21.5774
rs648161	A	G	A	G	-0.425907	-0.191033	0.624464	0.648484	FALSE	FALSE	FALSE	18	7042403	0.149094	397665	0.200089	Generalized pustular psoriasis || id:finngen_R10_L12_PSORI_PUSTGEN	18	7042402	0.091468	5.4305e-06	233	Genus_Streptococcus_Dorsalforearm_Dry_PopGen || id:GCST90133234-1	2	TRUE	0.0851322	21.4955
rs7215354	G	A	G	A	-0.47275	0.258492	0.746781	0.720274	FALSE	FALSE	FALSE	17	50644879	0.158288	397665	0.102459	Generalized pustular psoriasis || id:finngen_R10_L12_PSORI_PUSTGEN	17	48722240	0.103243	7.6369e-06	233	Genus_Streptococcus_Dorsalforearm_Dry_PopGen || id:GCST90133234-1	2	TRUE	0.0825595	20.7874
rs72808194	G	C	G	C	-0.7456	0.318586	0.916309	0.908635	FALSE	TRUE	FALSE	5	159918615	0.244994	397665	0.19347	Generalized pustular psoriasis || id:finngen_R10_L12_PSORI_PUSTGEN	5	159345622	0.16334	8.1307e-06	233	Genus_Streptococcus_Dorsalforearm_Dry_PopGen || id:GCST90133234-1	2	TRUE	0.0820863	20.6576
rs957231	G	A	G	A	-0.638355	0.0171829	0.845494	0.86069	FALSE	FALSE	FALSE	3	150999132	0.204547	397665	0.933053	Generalized pustular psoriasis || id:finngen_R10_L12_PSORI_PUSTGEN	3	150716919	0.120305	2.62171e-07	233	Genus_Streptococcus_Dorsalforearm_Dry_PopGen || id:GCST90133234-1	2	TRUE	0.107809	27.9133
rs12460776	G	A	G	A	-0.876079	-0.231432	0.944444	0.930784	FALSE	FALSE	FALSE	19	54687475	0.27899	397665	0.406801	Generalized pustular psoriasis || id:finngen_R10_L12_PSORI_PUSTGEN	19	55198771	0.191748	7.9666e-06	234	Genus_Streptococcus_Volarforearm_Dry_PopGen || id:GCST90133234-2	2	TRUE	0.0819027	20.6965
rs16905575	T	G	T	G	-0.684837	-0.187195	0.90812	0.896732	FALSE	FALSE	FALSE	9	117384493	0.232945	397665	0.421628	Generalized pustular psoriasis || id:finngen_R10_L12_PSORI_PUSTGEN	9	120146772	0.142453	2.74843e-06	234	Genus_Streptococcus_Volarforearm_Dry_PopGen || id:GCST90133234-2	2	TRUE	0.0898898	22.9142
rs17384121	C	T	C	T	-0.810447	0.0535905	0.938034	0.900949	FALSE	FALSE	FALSE	9	118941150	0.237721	397665	0.821641	Generalized pustular psoriasis || id:finngen_R10_L12_PSORI_PUSTGEN	9	121703428	0.177176	7.78234e-06	234	Genus_Streptococcus_Volarforearm_Dry_PopGen || id:GCST90133234-2	2	TRUE	0.0820787	20.745
rs28661929	G	T	G	T	-0.7494	0.204776	0.901709	0.92775	FALSE	FALSE	FALSE	15	35726433	0.275676	397665	0.457594	Generalized pustular psoriasis || id:finngen_R10_L12_PSORI_PUSTGEN	15	36018634	0.157509	3.44137e-06	234	Genus_Streptococcus_Volarforearm_Dry_PopGen || id:GCST90133234-2	2	TRUE	0.0882056	22.4433
rs61942139	G	A	G	A	0.553676	0.0606917	0.83547	0.870274	FALSE	FALSE	FALSE	12	106269985	0.209427	397665	0.771971	Generalized pustular psoriasis || id:finngen_R10_L12_PSORI_PUSTGEN	12	106663763	0.12247	9.81956e-06	234	Genus_Streptococcus_Volarforearm_Dry_PopGen || id:GCST90133234-2	2	TRUE	0.0803289	20.2641
rs7222487	T	G	T	G	0.68131	0.0454148	0.867521	0.873616	FALSE	FALSE	FALSE	17	879659	0.209462	397665	0.828351	Generalized pustular psoriasis || id:finngen_R10_L12_PSORI_PUSTGEN	17	782899	0.135276	9.5279e-07	234	Genus_Streptococcus_Volarforearm_Dry_PopGen || id:GCST90133234-2	2	TRUE	0.0977995	25.1491
rs12893622	C	T	C	T	-1.10345	-0.447531	0.936364	0.921351	FALSE	FALSE	FALSE	14	52208926	0.264193	397665	0.0902734	Generalized pustular psoriasis || id:finngen_R10_L12_PSORI_PUSTGEN	14	52675644	0.215461	8.47476e-07	165	Genus_Chryseobacterium_Dorsalforearm_Dry_PopGen || id:GCST90133236-1	2	TRUE	0.137158	25.9105
rs13211056	A	G	A	G	-0.488296	0.113368	0.587879	0.605077	FALSE	FALSE	FALSE	6	20961640	0.143864	397665	0.430683	Generalized pustular psoriasis || id:finngen_R10_L12_PSORI_PUSTGEN	6	20961871	0.100176	2.57137e-06	165	Genus_Chryseobacterium_Dorsalforearm_Dry_PopGen || id:GCST90133236-1	2	TRUE	0.125872	23.4715
rs2012235	T	C	T	C	-0.524204	0.0575623	0.681818	0.655776	FALSE	FALSE	FALSE	1	68447072	0.149084	397665	0.699417	Generalized pustular psoriasis || id:finngen_R10_L12_PSORI_PUSTGEN	1	68912755	0.11314	7.33033e-06	165	Genus_Chryseobacterium_Dorsalforearm_Dry_PopGen || id:GCST90133236-1	2	TRUE	0.115124	21.2065
rs3807302	T	C	T	C	0.489323	0.00994381	0.642424	0.72243	FALSE	FALSE	FALSE	7	129004803	0.158078	397665	0.949843	Generalized pustular psoriasis || id:finngen_R10_L12_PSORI_PUSTGEN	7	128644857	0.104583	6.0309e-06	165	Genus_Chryseobacterium_Dorsalforearm_Dry_PopGen || id:GCST90133236-1	2	TRUE	0.117132	21.6256
rs665207	G	T	G	T	-0.744956	0.044057	0.845455	0.837114	FALSE	FALSE	FALSE	18	22514315	0.190232	397665	0.816851	Generalized pustular psoriasis || id:finngen_R10_L12_PSORI_PUSTGEN	18	20094278	0.143346	5.99167e-07	165	Genus_Chryseobacterium_Dorsalforearm_Dry_PopGen || id:GCST90133236-1	2	TRUE	0.140661	26.6806
rs9381217	A	G	A	G	-0.904829	0.0637882	0.927273	0.957019	FALSE	FALSE	FALSE	6	42761634	0.351253	397665	0.855895	Generalized pustular psoriasis || id:finngen_R10_L12_PSORI_PUSTGEN	6	42729372	0.197125	8.80493e-06	165	Genus_Chryseobacterium_Dorsalforearm_Dry_PopGen || id:GCST90133236-1	2	TRUE	0.113234	20.814
rs2400118	A	G	A	G	0.51419	0.100331	0.722222	0.743159	FALSE	FALSE	FALSE	10	15106149	0.160358	397665	0.531533	Generalized pustular psoriasis || id:finngen_R10_L12_PSORI_PUSTGEN	10	15148148	0.111925	8.76407e-06	162	Genus_Chryseobacterium_Volarforearm_Dry_PopGen || id:GCST90133236-2	2	TRUE	0.115263	20.8447
rs6555076	C	T	C	T	0.545129	0.177853	0.450617	0.547341	FALSE	FALSE	FALSE	5	2272499	0.142134	397665	0.210823	Generalized pustular psoriasis || id:finngen_R10_L12_PSORI_PUSTGEN	5	2272613	0.110625	2.06075e-06	162	Genus_Chryseobacterium_Volarforearm_Dry_PopGen || id:GCST90133236-2	2	TRUE	0.130353	23.9826
rs6594434	G	A	G	A	-0.680321	0.177352	0.824074	0.868268	FALSE	FALSE	FALSE	5	110160435	0.210829	397665	0.400228	Generalized pustular psoriasis || id:finngen_R10_L12_PSORI_PUSTGEN	5	109496136	0.138535	2.22102e-06	162	Genus_Chryseobacterium_Volarforearm_Dry_PopGen || id:GCST90133236-2	2	TRUE	0.129576	23.8185
rs7302235	T	C	T	C	-0.547382	0.0208648	0.753086	0.78742	FALSE	FALSE	FALSE	12	47899055	0.172745	397665	0.903863	Generalized pustular psoriasis || id:finngen_R10_L12_PSORI_PUSTGEN	12	48292838	0.116265	5.38648e-06	162	Genus_Chryseobacterium_Volarforearm_Dry_PopGen || id:GCST90133236-2	2	TRUE	0.120357	21.8919
rs7339361	C	T	C	T	-0.969383	-0.701456	0.938272	0.93046	FALSE	FALSE	FALSE	13	108851784	0.28173	397665	0.0127809	Generalized pustular psoriasis || id:finngen_R10_L12_PSORI_PUSTGEN	13	109504132	0.212009	9.6055e-06	162	Genus_Chryseobacterium_Volarforearm_Dry_PopGen || id:GCST90133236-2	2	TRUE	0.114301	20.6483
rs12540948	A	T	A	T	-0.893188	0.189774	0.933921	0.969133	FALSE	TRUE	FALSE	7	12664197	0.407631	397665	0.641534	Generalized pustular psoriasis || id:finngen_R10_L12_PSORI_PUSTGEN	7	12703822	0.186236	2.94483e-06	227	Genus_Acinetobacter_Dorsalforearm_Dry_PopGen || id:GCST90133237-1	2	TRUE	0.0920061	22.799
rs1959553	C	T	C	T	-0.414792	0.133623	0.601322	0.550617	FALSE	FALSE	FALSE	14	48724098	0.141998	397665	0.346693	Generalized pustular psoriasis || id:finngen_R10_L12_PSORI_PUSTGEN	14	49193301	0.0898252	6.52354e-06	227	Genus_Acinetobacter_Dorsalforearm_Dry_PopGen || id:GCST90133237-1	2	TRUE	0.085871	21.1359
rs2031063	T	C	T	C	-0.45696	-0.0988628	0.689427	0.718902	FALSE	FALSE	FALSE	14	21534209	0.161334	397665	0.54002	Generalized pustular psoriasis || id:finngen_R10_L12_PSORI_PUSTGEN	14	22002343	0.10101	9.82639e-06	227	Genus_Acinetobacter_Dorsalforearm_Dry_PopGen || id:GCST90133237-1	2	TRUE	0.0827022	20.2857
rs304020	T	C	T	C	-0.597734	-0.0139622	0.803965	0.798893	FALSE	FALSE	FALSE	3	4523544	0.175905	397665	0.936736	Generalized pustular psoriasis || id:finngen_R10_L12_PSORI_PUSTGEN	3	4565228	0.114133	3.74036e-07	227	Genus_Acinetobacter_Dorsalforearm_Dry_PopGen || id:GCST90133237-1	2	TRUE	0.107803	27.1863
rs36125261	T	G	T	G	0.574782	-0.2981	0.834802	0.855038	FALSE	FALSE	FALSE	4	136431847	0.199519	397665	0.13515	Generalized pustular psoriasis || id:finngen_R10_L12_PSORI_PUSTGEN	4	137353002	0.120533	3.33204e-06	227	Genus_Acinetobacter_Dorsalforearm_Dry_PopGen || id:GCST90133237-1	2	TRUE	0.0910548	22.5397
rs3827962	T	C	T	C	-0.558491	0.0861013	0.823789	0.81214	FALSE	FALSE	FALSE	20	20535376	0.180838	397665	0.633986	Generalized pustular psoriasis || id:finngen_R10_L12_PSORI_PUSTGEN	20	20516020	0.117212	3.3905e-06	227	Genus_Acinetobacter_Dorsalforearm_Dry_PopGen || id:GCST90133237-1	2	TRUE	0.0909208	22.5032
rs62068856	G	A	G	A	0.519019	0.115736	0.801762	0.675708	FALSE	FALSE	FALSE	17	70900034	0.150344	397665	0.441415	Generalized pustular psoriasis || id:finngen_R10_L12_PSORI_PUSTGEN	17	68896175	0.112098	6.18025e-06	227	Genus_Acinetobacter_Dorsalforearm_Dry_PopGen || id:GCST90133237-1	2	TRUE	0.0862887	21.2485
rs7259156	G	A	G	A	-0.86694	-0.152646	0.927313	0.861607	FALSE	FALSE	FALSE	19	10387790	0.203259	397665	0.452658	Generalized pustular psoriasis || id:finngen_R10_L12_PSORI_PUSTGEN	19	10498466	0.178749	2.30361e-06	227	Genus_Acinetobacter_Dorsalforearm_Dry_PopGen || id:GCST90133237-1	2	TRUE	0.0938954	23.3157
rs75113394	G	T	G	T	-0.933056	-0.107609	0.947137	0.945303	FALSE	FALSE	FALSE	17	74117633	0.311905	397665	0.730091	Generalized pustular psoriasis || id:finngen_R10_L12_PSORI_PUSTGEN	17	72113772	0.206168	9.751e-06	227	Genus_Acinetobacter_Dorsalforearm_Dry_PopGen || id:GCST90133237-1	2	TRUE	0.0827618	20.3016
rs76950018	C	T	C	T	-0.623869	0.46607	0.865639	0.886866	FALSE	FALSE	FALSE	3	82360196	0.225241	397665	0.0385265	Generalized pustular psoriasis || id:finngen_R10_L12_PSORI_PUSTGEN	3	82409347	0.136918	8.52978e-06	227	Genus_Acinetobacter_Dorsalforearm_Dry_PopGen || id:GCST90133237-1	2	TRUE	0.0837975	20.5789
rs111677838	A	G	A	G	-0.892773	0.215671	0.933628	0.970506	FALSE	FALSE	FALSE	7	114995057	0.403756	397665	0.593231	Generalized pustular psoriasis || id:finngen_R10_L12_PSORI_PUSTGEN	7	114635111	0.185779	2.82706e-06	226	Genus_Acinetobacter_Volarforearm_Dry_PopGen || id:GCST90133237-2	2	TRUE	0.0927103	22.8892
rs13404351	A	G	A	G	-0.639639	-0.0276626	0.873894	0.888695	FALSE	FALSE	FALSE	2	38231593	0.22276	397665	0.901172	Generalized pustular psoriasis || id:finngen_R10_L12_PSORI_PUSTGEN	2	38458735	0.139352	7.38182e-06	226	Genus_Acinetobacter_Volarforearm_Dry_PopGen || id:GCST90133237-2	2	TRUE	0.0852758	20.8826
rs149780745	C	T	C	T	-0.71511	-0.699741	0.915929	0.926134	FALSE	FALSE	FALSE	5	75097923	0.271881	397665	0.0100614	Generalized pustular psoriasis || id:finngen_R10_L12_PSORI_PUSTGEN	5	74393748	0.155093	6.73998e-06	226	Genus_Acinetobacter_Volarforearm_Dry_PopGen || id:GCST90133237-2	2	TRUE	0.0859819	21.0717
rs2405112	G	A	G	A	-0.517864	-0.19716	0.800885	0.702255	FALSE	FALSE	FALSE	4	135481558	0.153269	397665	0.198316	Generalized pustular psoriasis || id:finngen_R10_L12_PSORI_PUSTGEN	4	136402713	0.113672	8.57464e-06	226	Genus_Acinetobacter_Volarforearm_Dry_PopGen || id:GCST90133237-2	2	TRUE	0.0841125	20.5715
rs2780993	C	A	C	A	0.466854	-0.163356	0.75885	0.749923	FALSE	FALSE	FALSE	9	83573298	0.163107	397665	0.316572	Generalized pustular psoriasis || id:finngen_R10_L12_PSORI_PUSTGEN	9	86188213	0.101136	6.58649e-06	226	Genus_Acinetobacter_Volarforearm_Dry_PopGen || id:GCST90133237-2	2	TRUE	0.0861607	21.1197
rs62109119	A	C	A	C	0.716067	-0.414509	0.900442	0.880708	FALSE	FALSE	FALSE	19	13339561	0.218426	397665	0.0577338	Generalized pustular psoriasis || id:finngen_R10_L12_PSORI_PUSTGEN	19	13450375	0.154112	5.76291e-06	226	Genus_Acinetobacter_Volarforearm_Dry_PopGen || id:GCST90133237-2	2	TRUE	0.0871969	21.3979
rs73162649	T	G	T	G	0.690314	-0.387422	0.896018	0.908432	FALSE	FALSE	FALSE	12	129981163	0.244811	397665	0.113527	Generalized pustular psoriasis || id:finngen_R10_L12_PSORI_PUSTGEN	12	130465708	0.147986	5.31442e-06	226	Genus_Acinetobacter_Volarforearm_Dry_PopGen || id:GCST90133237-2	2	TRUE	0.087825	21.5669
rs76548567	A	G	A	G	-0.742535	-0.122464	0.90708	0.906654	FALSE	FALSE	FALSE	11	21465183	0.240099	397665	0.610011	Generalized pustular psoriasis || id:finngen_R10_L12_PSORI_PUSTGEN	11	21486729	0.153208	2.34642e-06	226	Genus_Acinetobacter_Volarforearm_Dry_PopGen || id:GCST90133237-2	2	TRUE	0.0941497	23.2815
rs11569020	A	G	A	G	-0.928615	-0.0874317	0.930108	0.936062	FALSE	FALSE	FALSE	4	109981913	0.287592	397665	0.761118	Generalized pustular psoriasis || id:finngen_R10_L12_PSORI_PUSTGEN	4	110903069	0.197451	5.01765e-06	186	Genus_Paracoccus_Dorsalforearm_Dry_PopGen || id:GCST90133238-1	2	TRUE	0.106278	21.8805
rs12583353	A	G	A	G	-0.720948	-0.00223218	0.889785	0.851336	FALSE	FALSE	FALSE	13	37493438	0.200056	397665	0.991098	Generalized pustular psoriasis || id:finngen_R10_L12_PSORI_PUSTGEN	13	38067575	0.156002	7.15289e-06	186	Genus_Paracoccus_Dorsalforearm_Dry_PopGen || id:GCST90133238-1	2	TRUE	0.102998	21.1278
rs17241022	G	A	G	A	-0.811424	-0.0870071	0.895161	0.875013	FALSE	FALSE	FALSE	16	57920621	0.213626	397665	0.683797	Generalized pustular psoriasis || id:finngen_R10_L12_PSORI_PUSTGEN	16	57954525	0.161806	1.24368e-06	186	Genus_Paracoccus_Dorsalforearm_Dry_PopGen || id:GCST90133238-1	2	TRUE	0.119102	24.8777
rs640184	G	A	G	A	-0.639823	-0.230261	0.857527	0.855359	FALSE	FALSE	FALSE	9	98354047	0.199533	397665	0.2485	Generalized pustular psoriasis || id:finngen_R10_L12_PSORI_PUSTGEN	9	101116329	0.131723	2.53531e-06	186	Genus_Paracoccus_Dorsalforearm_Dry_PopGen || id:GCST90133238-1	2	TRUE	0.112569	23.3402
rs643106	T	A	T	A	-0.93612	0.0713913	0.932796	0.925321	FALSE	TRUE	FALSE	7	125148521	0.267542	397665	0.789591	Generalized pustular psoriasis || id:finngen_R10_L12_PSORI_PUSTGEN	7	124788575	0.200937	6.08459e-06	186	Genus_Paracoccus_Dorsalforearm_Dry_PopGen || id:GCST90133238-1	2	TRUE	0.104495	21.4707
rs6996139	C	T	C	T	-0.483451	0.255468	0.629032	0.662891	FALSE	FALSE	FALSE	8	129543825	0.149771	397665	0.0880603	Generalized pustular psoriasis || id:finngen_R10_L12_PSORI_PUSTGEN	8	130556071	0.102039	4.30599e-06	186	Genus_Paracoccus_Dorsalforearm_Dry_PopGen || id:GCST90133238-1	2	TRUE	0.10769	22.2063
rs7117184	G	A	G	A	-0.767815	0.0927576	0.903226	0.930446	FALSE	FALSE	FALSE	11	88341550	0.274646	397665	0.735563	Generalized pustular psoriasis || id:finngen_R10_L12_PSORI_PUSTGEN	11	88074718	0.162378	4.48627e-06	186	Genus_Paracoccus_Dorsalforearm_Dry_PopGen || id:GCST90133238-1	2	TRUE	0.107311	22.1189
rs73136542	G	A	G	A	-0.941252	-0.26568	0.932796	0.960879	FALSE	FALSE	FALSE	2	8650680	0.368422	397665	0.47083	Generalized pustular psoriasis || id:finngen_R10_L12_PSORI_PUSTGEN	2	8790810	0.200807	5.3729e-06	186	Genus_Paracoccus_Dorsalforearm_Dry_PopGen || id:GCST90133238-1	2	TRUE	0.105645	21.735
rs76013506	A	G	A	G	-0.686727	-0.608827	0.841398	0.907418	FALSE	FALSE	FALSE	11	63691726	0.243709	397665	0.0124836	Generalized pustular psoriasis || id:finngen_R10_L12_PSORI_PUSTGEN	11	63459198	0.132916	6.16525e-07	186	Genus_Paracoccus_Dorsalforearm_Dry_PopGen || id:GCST90133238-1	2	TRUE	0.125505	26.407
rs10801363	T	A	T	A	0.504419	-0.0261786	0.610215	0.667397	FALSE	TRUE	FALSE	1	194953077	0.149622	397665	0.861107	Generalized pustular psoriasis || id:finngen_R10_L12_PSORI_PUSTGEN	1	194922207	0.107522	5.28038e-06	186	Genus_Paracoccus_Volarforearm_Dry_PopGen || id:GCST90133238-2	2	TRUE	0.105806	21.7719
rs10986020	A	G	A	G	-0.931344	0.338827	0.922043	0.920214	FALSE	FALSE	FALSE	9	123449487	0.259588	397665	0.191809	Generalized pustular psoriasis || id:finngen_R10_L12_PSORI_PUSTGEN	9	126211766	0.18546	1.20445e-06	186	Genus_Paracoccus_Volarforearm_Dry_PopGen || id:GCST90133238-2	2	TRUE	0.119395	24.9473
rs12456652	A	C	A	C	-0.598046	-0.347561	0.846774	0.845822	FALSE	FALSE	FALSE	18	55582819	0.195234	397665	0.0750378	Generalized pustular psoriasis || id:finngen_R10_L12_PSORI_PUSTGEN	18	53250050	0.128972	6.68635e-06	186	Genus_Paracoccus_Volarforearm_Dry_PopGen || id:GCST90133238-2	2	TRUE	0.103623	21.2707
rs12583353	A	G	A	G	-0.941265	-0.00223218	0.88172	0.851336	FALSE	FALSE	FALSE	13	37493438	0.200056	397665	0.991098	Generalized pustular psoriasis || id:finngen_R10_L12_PSORI_PUSTGEN	13	38067575	0.143708	5.59157e-10	186	Genus_Paracoccus_Volarforearm_Dry_PopGen || id:GCST90133238-2	2	TRUE	0.187419	42.4391
rs12781740	C	T	C	T	-0.633722	-0.114491	0.86828	0.808536	FALSE	FALSE	FALSE	10	62618207	0.179771	397665	0.524206	Generalized pustular psoriasis || id:finngen_R10_L12_PSORI_PUSTGEN	10	64377967	0.136338	6.37069e-06	186	Genus_Paracoccus_Volarforearm_Dry_PopGen || id:GCST90133238-2	2	TRUE	0.10407	21.3733
rs45546031	C	T	C	T	-0.591108	0.000649745	0.827957	0.851375	FALSE	FALSE	FALSE	10	95290798	0.199354	397665	0.997399	Generalized pustular psoriasis || id:finngen_R10_L12_PSORI_PUSTGEN	10	97050555	0.120885	2.19153e-06	186	Genus_Paracoccus_Volarforearm_Dry_PopGen || id:GCST90133238-2	2	TRUE	0.113909	23.6535
rs72752881	G	A	G	A	-0.736345	-0.4786	0.876344	0.853398	FALSE	FALSE	FALSE	1	240602074	0.199493	397665	0.0164361	Generalized pustular psoriasis || id:finngen_R10_L12_PSORI_PUSTGEN	1	240765374	0.147783	1.44042e-06	186	Genus_Paracoccus_Volarforearm_Dry_PopGen || id:GCST90133238-2	2	TRUE	0.117758	24.5595
rs7512985	G	A	G	A	0.487232	0.0400143	0.577957	0.614371	FALSE	FALSE	FALSE	1	181711957	0.144443	397665	0.781761	Generalized pustular psoriasis || id:finngen_R10_L12_PSORI_PUSTGEN	1	181681093	0.100211	2.48242e-06	186	Genus_Paracoccus_Volarforearm_Dry_PopGen || id:GCST90133238-2	2	TRUE	0.112763	23.3855
rs7611260	C	T	C	T	-0.43698	-0.206552	0.620968	0.633873	FALSE	FALSE	FALSE	3	32983618	0.146806	397665	0.159436	Generalized pustular psoriasis || id:finngen_R10_L12_PSORI_PUSTGEN	3	33025110	0.0955748	8.8422e-06	186	Genus_Paracoccus_Volarforearm_Dry_PopGen || id:GCST90133238-2	2	TRUE	0.101034	20.6796
[truncated: 2,811 more rows]

## Sheet: ST3
Supplement tabel 3: MR estimates for the association between skin microbiome and psoriasis and related disorders
[truncated: 2,388 more rows]

## Sheet: ST4
Supplement tabel 4: Heterogeneity test and horizontal pleiotropy test for skin microbiome on psoriasis and related disorders
[truncated: 478 more rows]
